# Supplementary material for: Disruption of the Aspergillus fumigatus RNA interference machinery alters the conidial transcriptome
Source: bioRxiv preprint, doi:10.1101/2022.07.28.501871, version 2 (2023-02-14)
Supplement: Dataset_S2 [file 501871_file10.xlsx]

## Sheet: Read_Counts
Gene	CEA17_0h_1	CEA17_0h_2	CEA17_0h_3	CEA17_24h_1	CEA17_24h_2	CEA17_24h_3	CEA17_48h_1	CEA17_48h_2	CEA17_48h_3	dclA_dclB_0h_1	dclA_dclB_0h_2	dclA_dclB_0h_3	dclA_dclB_24h_1	dclA_dclB_24h_2	dclA_dclB_24h_3	dclA_dclB_48h_1	dclA_dclB_48h_2	dclA_dclB_48h_3	ppdA_ppdB_0h_1	ppdA_ppdB_0h_2	ppdA_ppdB_0h_3	ppdA_ppdB_24h_1	ppdA_ppdB_24h_2	ppdA_ppdB_24h_3	ppdA_ppdB_48h_1	ppdA_ppdB_48h_2	ppdA_ppdB_48h_3	rrpA_rrpB_0h_1	rrpA_rrpB_0h_2	rrpA_rrpB_0h_3	rrpA_rrpB_24h_1	rrpA_rrpB_24h_2	rrpA_rrpB_24h_3	rrpA_rrpB_48h_1	rrpA_rrpB_48h_2	rrpA_rrpB_48h_3
AFUA_1G00100	3	0	0	6	7	4	5	3	2	0	0	0	1	5	8	5	4	1	0	2	0	2	2	2	3	0	6	0	0	0	6	3	2	9	2	1
AFUA_1G00110	2	3	0	9	10	3	12	10	4	0	0	0	22	7	9	5	5	4	0	0	0	13	14	4	4	4	6	0	0	0	6	28	1	12	4	8
AFUA_1G00120	0	0	0	0	0	0	0	0	0	0	0	0	0	0	0	0	0	0	0	0	0	0	0	0	0	0	0	0	0	0	0	0	0	0	0	0
AFUA_1G00130	0	0	0	0	0	0	0	0	0	0	0	0	0	0	0	0	0	0	0	0	0	0	0	0	0	0	0	0	0	0	0	0	0	0	0	0
AFUA_1G00150	9	21	13	1307	1571	1335	2544	1576	1299	23	15	9	1633	1428	1462	1739	1239	975	14	3	6	2121	1427	1687	1719	1053	1025	10	12	8	1104	1266	1216	1496	1134	445
AFUA_1G00160	0	0	0	0	0	0	1	1	2	0	0	0	0	0	0	1	0	1	0	0	0	0	0	0	0	0	0	0	0	0	0	1	0	2	0	0
AFUA_1G00170	0	0	0	0	4	0	1	3	0	0	0	0	4	0	0	3	0	0	0	0	1	2	0	0	0	9	0	0	0	0	0	0	0	5	2	0
AFUA_1G00180	0	0	0	0	0	0	0	0	0	0	0	0	0	0	0	0	0	0	0	0	0	0	0	0	0	0	0	0	0	0	0	0	0	0	0	0
AFUA_1G00200	0	0	0	5	0	0	12	6	2	0	0	0	4	3	1	8	7	6	2	0	0	0	3	0	7	4	8	3	2	1	10	3	2	4	15	9
AFUA_1G00210	0	1	0	0	0	0	0	0	0	0	0	0	0	0	0	0	0	0	0	0	1	0	0	0	0	0	0	0	0	0	0	0	0	0	0	0
AFUA_1G00220	0	0	0	0	0	0	0	0	0	0	0	0	0	0	0	0	0	0	0	0	0	0	0	0	0	0	0	0	0	0	0	0	0	0	0	0
AFUA_1G00230	0	2	0	0	0	0	0	0	0	0	0	0	0	0	0	0	0	0	0	0	0	0	0	0	0	0	0	0	1	0	0	0	0	0	0	0
AFUA_1G00250	0	0	0	0	0	0	0	0	0	0	0	0	0	0	0	0	0	0	0	0	0	0	0	0	0	0	0	0	0	0	0	0	0	0	0	0
AFUA_1G00270	0	0	0	0	0	0	0	0	0	0	0	0	0	0	0	0	0	0	0	0	0	0	0	0	0	0	0	0	0	0	0	0	0	0	0	0
AFUA_1G00280	0	0	0	0	0	0	0	0	0	0	0	0	0	0	0	0	0	0	1	0	0	0	0	0	0	0	0	0	0	0	0	0	0	0	0	0
AFUA_1G00310	0	0	0	0	0	0	0	0	0	0	0	0	0	0	0	0	0	0	0	0	0	0	0	0	0	0	0	0	0	0	0	0	0	0	0	0
AFUA_1G00320	0	0	0	0	0	0	0	0	0	0	0	0	0	0	0	0	0	0	0	0	0	0	0	0	0	0	0	0	0	0	0	0	0	0	0	0
AFUA_1G00330	0	0	0	0	0	0	0	0	0	0	0	0	0	0	0	0	0	0	0	0	0	0	0	0	0	0	0	0	0	0	0	0	0	0	0	0
AFUA_1G00340	0	0	0	0	0	0	0	0	0	0	0	0	0	0	0	0	0	0	0	0	0	0	0	0	0	0	0	0	0	0	0	0	0	0	0	0
AFUA_1G00350	10	5	8	1	0	1	5	3	1	1	2	6	0	2	0	4	1	0	2	1	3	5	0	0	3	5	0	1	7	2	1	1	1	1	1	0
AFUA_1G00400	0	0	0	0	0	0	0	0	0	0	0	0	0	0	0	0	0	0	0	0	0	0	0	0	0	0	0	0	0	0	0	0	0	0	0	0
AFUA_1G00420	13	14	22	64	69	36	4	14	47	17	7	4	63	60	20	11	46	27	19	9	15	60	48	41	46	4	57	8	11	13	55	85	36	33	29	28
AFUA_1G00440	658	472	425	8	17	14	180	116	80	528	463	380	43	43	17	117	98	59	648	304	551	44	22	20	197	158	46	348	378	294	26	17	15	138	83	15
AFUA_1G00450	713	707	999	70	82	17	718	674	689	466	543	661	51	49	25	843	657	540	2209	1227	2085	58	30	20	1088	644	333	1151	1033	819	39	54	14	445	388	150
AFUA_1G00470	39	35	64	51	36	58	89	80	102	43	40	25	48	49	63	83	96	92	49	42	60	67	46	70	113	100	61	39	48	51	40	64	55	92	78	30
AFUA_1G00480	2801	2243	3023	111	112	26	506	473	775	2195	1695	1527	59	66	50	730	636	640	3763	1713	3019	81	65	46	1136	669	367	2406	2726	2697	98	60	45	352	430	162
AFUA_1G00490	0	0	0	0	0	0	0	0	0	0	0	0	0	0	0	0	0	0	0	0	0	0	0	0	0	0	0	0	0	0	0	0	0	0	0	0
AFUA_1G00500	189	149	261	1810	2676	833	342	608	5024	138	119	154	2081	2004	1543	608	4192	8852	1544	1671	1740	2033	2629	1438	1510	722	9542	850	574	390	4646	3636	1418	517	10852	7753
AFUA_1G00510	7587	6420	7314	1669	2443	998	368	617	2114	4649	4551	3744	892	986	1346	321	1799	2604	4501	3803	3099	1020	1053	1208	955	407	4513	5007	6827	7275	2384	1012	1491	551	3779	2167
AFUA_1G00520	237	274	299	118	123	37	27	41	125	165	182	178	49	54	69	31	136	139	139	265	106	34	15	59	80	38	162	151	198	240	61	69	47	50	269	74
AFUA_1G00530	2721	2390	2754	844	1148	556	1346	1263	2943	2443	2288	2228	743	870	505	1370	2337	2746	1517	1194	1416	823	618	614	2637	2206	3436	2138	2405	2056	578	648	514	1165	2956	2174
AFUA_1G00550	6	2	13	201	263	169	450	281	225	4	0	13	154	153	189	252	193	180	13	7	4	160	157	233	260	288	190	4	14	5	138	163	169	317	324	116
AFUA_1G00560	20	7	9	451	506	623	2210	1749	1726	16	8	4	1142	889	593	1972	1624	1277	12	7	8	762	490	521	1350	917	1080	10	12	11	938	796	529	1295	1597	899
AFUA_1G00580	21	8	30	26	28	44	70	44	106	7	8	17	32	29	40	76	94	96	32	12	30	50	26	40	175	111	50	19	13	11	48	38	32	30	106	44
AFUA_1G00610	403	331	401	113	166	57	118	71	101	245	234	184	86	105	67	78	86	46	143	148	131	87	67	91	128	83	102	231	262	320	88	103	46	78	114	19
AFUA_1G00630	0	0	0	0	0	0	0	0	0	0	0	0	0	0	0	0	0	0	0	0	0	0	0	0	0	0	0	0	0	0	0	0	0	0	0	0
AFUA_1G00640	0	0	0	0	0	0	0	0	0	0	0	0	0	0	0	0	0	0	0	0	0	0	0	0	0	0	0	0	0	0	0	0	0	0	0	0
AFUA_1G00650	0	0	0	0	0	0	0	0	0	0	0	0	0	0	0	0	0	0	0	0	0	0	0	0	0	0	0	0	0	0	0	0	0	0	0	0
AFUA_1G00660	0	0	0	0	0	0	0	0	0	0	0	0	0	0	0	0	0	0	0	0	0	0	0	0	0	0	0	0	0	0	0	0	0	0	0	0
AFUA_1G00670	0	0	0	0	0	0	0	0	0	0	0	0	0	0	0	0	0	0	0	0	0	0	0	0	0	0	0	0	0	0	0	0	0	0	0	0
AFUA_1G00690	0	0	0	0	0	0	0	0	0	0	0	0	0	0	0	0	0	0	0	0	0	0	0	0	0	0	0	0	0	0	0	0	0	0	0	0
AFUA_1G00700	0	0	0	0	0	0	0	0	0	0	0	0	0	0	0	0	0	0	0	0	0	0	0	0	0	0	0	0	0	0	0	0	0	0	0	0
AFUA_1G00710	0	0	0	0	0	0	0	0	0	0	0	0	0	0	0	0	0	0	0	0	0	0	0	0	0	0	0	0	0	0	0	0	0	0	0	0
AFUA_1G00720	0	0	0	0	0	0	0	0	0	0	0	0	0	0	0	0	0	0	0	0	0	0	0	0	0	0	0	0	0	0	0	0	0	0	0	0
AFUA_1G00730	0	0	0	0	0	0	0	0	0	0	0	0	0	0	0	0	0	0	0	0	0	0	0	0	0	0	0	0	0	0	0	0	0	0	0	0
AFUA_1G00740	0	0	0	0	0	0	0	0	0	0	0	0	0	0	0	0	0	0	0	0	0	0	0	0	0	0	0	0	0	0	0	0	0	0	0	0
AFUA_1G00750	40	18	32	263	259	196	234	245	308	11	20	7	167	146	231	248	270	206	13	15	17	229	121	245	256	158	170	20	18	11	109	131	129	137	250	177
AFUA_1G00760	167	107	100	157	174	65	207	168	172	120	108	67	172	203	84	170	146	120	46	50	31	236	136	143	189	111	112	34	48	53	177	225	59	183	174	51
AFUA_1G00770	0	0	0	1	0	0	0	0	0	0	0	0	0	0	1	0	0	0	0	0	1	0	3	0	0	0	0	0	0	0	0	2	0	0	1	0
AFUA_1G00780	0	0	0	0	0	0	0	0	0	0	0	0	0	0	0	0	0	0	0	0	0	0	0	0	0	0	0	0	0	0	0	0	0	0	0	0
AFUA_1G00790	0	0	0	0	0	0	0	0	1	0	0	0	0	0	0	0	0	0	0	0	0	0	0	0	0	0	0	0	0	0	0	0	0	0	0	0
AFUA_1G00800	0	0	0	0	0	0	0	0	0	0	0	0	0	0	0	0	0	0	0	0	0	0	0	0	0	0	0	0	0	0	0	0	0	0	0	0
AFUA_1G00810	0	0	0	0	0	0	0	0	0	0	0	0	0	0	0	0	0	0	0	0	0	0	0	0	0	0	0	0	0	0	0	0	0	0	0	0
AFUA_1G00820	0	0	0	0	0	0	0	0	0	0	0	0	0	0	0	0	0	0	0	0	0	0	0	0	0	0	0	0	0	0	0	0	0	0	0	0
AFUA_1G00830	0	0	0	0	0	0	0	0	0	0	0	0	0	0	0	0	0	0	0	0	0	0	0	0	0	0	0	0	0	0	0	0	0	0	0	0
AFUA_1G00840	0	0	0	0	0	0	0	0	0	0	0	0	0	0	0	0	0	0	0	0	0	0	0	0	0	0	0	0	0	0	0	0	0	0	0	0
AFUA_1G00850	0	0	0	0	0	0	0	0	0	0	0	0	0	0	0	0	0	0	0	0	0	0	0	0	0	0	0	0	0	0	0	0	0	0	0	0
AFUA_1G00890	0	0	0	0	0	0	0	0	0	0	0	0	0	0	0	0	0	0	0	0	0	0	0	0	0	0	0	0	0	0	0	0	0	0	0	0
AFUA_1G00910	0	0	0	0	0	0	0	0	0	0	0	0	0	0	0	0	0	0	0	0	0	0	0	0	0	0	0	1	0	0	0	0	0	0	0	0
AFUA_1G00920	2	2	4	1	0	0	1	1	1	3	4	0	1	0	0	1	0	0	2	1	2	0	0	0	1	1	0	7	1	4	4	1	0	1	0	0
AFUA_1G00930	0	0	2	0	0	0	0	0	0	2	1	0	0	0	0	0	0	0	0	0	0	0	0	0	0	0	0	0	0	0	0	0	0	0	0	0
AFUA_1G00950	0	0	0	0	0	0	0	0	0	0	0	0	0	0	0	0	0	0	0	0	0	0	0	0	0	0	0	0	0	0	0	0	0	0	0	0
AFUA_1G00970	0	0	0	0	0	0	0	0	0	0	0	0	0	0	0	0	0	0	0	0	0	0	0	0	0	0	0	0	0	0	0	0	0	0	0	0
AFUA_1G00980	1	0	2	0	0	0	0	0	0	0	0	0	0	0	0	0	0	0	0	0	0	0	0	0	0	0	0	0	0	0	0	0	0	0	0	0
AFUA_1G00990	0	0	0	0	0	0	0	0	0	0	0	0	0	0	0	0	0	0	0	0	0	0	0	0	0	0	0	0	1	0	0	0	0	0	0	0
AFUA_1G01000	0	0	0	0	0	0	0	0	0	0	0	0	0	0	0	0	0	0	0	0	0	0	0	0	0	0	0	0	0	0	0	0	0	0	0	0
AFUA_1G01010	0	0	0	0	0	0	0	2	0	0	0	0	0	1	0	0	0	0	0	0	0	0	0	0	0	0	0	0	2	0	0	0	0	0	0	0
AFUA_1G01020	0	0	0	0	2	0	0	0	0	0	0	0	0	0	0	0	0	0	0	0	0	0	0	0	0	1	0	0	0	0	1	0	0	0	0	0
AFUA_1G01040	0	0	0	0	0	0	0	0	0	0	0	0	0	0	0	0	0	0	0	0	0	0	0	0	0	0	0	0	0	0	0	0	0	0	0	0
AFUA_1G01050	0	0	0	0	0	0	0	0	0	0	0	0	1	0	0	0	0	0	0	0	0	0	0	1	0	0	0	0	0	0	0	0	0	0	0	0
AFUA_1G01070	0	0	0	0	0	0	0	0	0	0	0	0	0	0	0	0	0	0	0	0	0	0	0	0	0	0	0	0	0	0	0	0	0	0	0	0
AFUA_1G01080	0	0	0	0	0	0	0	0	0	0	0	0	0	0	0	0	0	0	0	0	0	0	0	0	0	0	0	0	0	0	0	0	0	0	0	0
AFUA_1G01090	0	0	0	0	0	0	0	0	0	0	0	0	0	0	0	0	0	0	0	0	0	0	0	0	0	0	0	0	0	0	0	0	0	0	0	0
AFUA_1G01100	0	0	1	1	11	9	1	4	0	0	0	0	13	9	2	6	2	4	0	1	0	8	3	10	3	5	5	0	2	2	0	5	11	6	0	0
AFUA_1G01110	0	0	0	4	7	0	0	0	1	0	0	1	0	0	2	0	0	0	0	0	0	0	1	6	0	0	2	0	0	2	0	1	0	3	0	0
AFUA_1G01120	0	1	0	1	9	1	9	8	3	0	0	0	4	0	0	8	2	6	0	0	0	2	2	2	1	10	0	0	0	0	2	0	1	11	13	5
AFUA_1G01130	10	5	18	7	12	10	27	20	6	4	1	0	13	10	8	23	5	2	21	14	9	28	15	5	26	26	7	4	7	4	5	19	7	24	4	4
AFUA_1G01140	63	40	49	23	25	52	95	54	28	10	26	11	60	57	53	57	37	35	139	78	90	69	41	54	56	53	11	31	17	46	60	71	58	85	67	35
AFUA_1G01160	654	467	402	33	51	41	173	123	109	652	494	424	66	53	36	160	104	85	316	214	236	64	44	34	205	49	128	179	214	156	52	68	28	199	94	56
AFUA_1G01175	25942	22637	26470	20	14	0	5	8	36	25479	24813	23673	11	10	0	24	18	49	19122	24359	18575	39	24	1	3	5	26	19122	22328	18426	13	32	0	7	16	26
AFUA_1G01180	474	306	410	11	5	1	2	2	1	230	228	141	10	14	4	0	3	1	452	447	416	11	6	2	1	1	0	342	341	393	16	6	4	1	1	4
AFUA_1G01190	129	93	108	30	35	12	3	0	3	101	83	58	15	31	5	1	1	8	125	95	107	13	15	2	1	0	12	130	112	113	33	23	5	0	3	1
AFUA_1G01200	0	0	2	1	6	0	0	0	0	1	0	0	2	0	0	1	0	0	0	0	0	2	1	2	1	4	4	1	0	0	1	1	0	4	0	0
AFUA_1G01210	0	0	0	2	5	0	1	0	1	0	0	0	2	3	2	2	0	0	0	0	0	7	5	3	0	1	0	0	0	0	1	2	0	1	0	1
AFUA_1G01220	0	0	0	5	10	9	3	0	3	0	0	0	12	12	6	2	2	1	0	0	0	9	7	7	2	1	0	0	0	0	4	14	8	3	0	6
AFUA_1G01230	248	135	99	56	54	26	83	47	26	113	82	65	49	26	42	40	32	14	29	24	28	46	24	42	22	49	42	48	73	66	43	33	21	56	41	26
AFUA_1G01240	335	287	369	175	233	139	389	252	220	146	127	129	266	210	187	242	227	193	228	67	170	319	210	176	236	189	175	252	290	226	238	256	129	191	260	152
AFUA_1G01250	275	165	232	76	74	59	286	240	115	173	137	69	138	109	49	213	136	111	131	122	139	146	96	66	156	135	106	143	204	156	127	168	50	233	139	59
AFUA_1G01260	33	18	48	17	14	3	29	17	3	4	6	7	13	16	12	13	4	16	3	2	8	3	3	1	22	11	1	15	20	22	9	11	4	34	24	3
AFUA_1G01265	1	1	1	2	19	4	13	12	5	1	3	4	26	17	3	7	1	2	2	0	3	15	5	11	7	3	3	0	1	0	5	9	1	2	1	0
AFUA_1G01270	0	1	0	3	4	1	24	23	2	1	3	0	10	8	3	30	5	2	0	0	2	3	2	1	7	6	0	0	0	1	4	5	4	8	11	0
AFUA_1G01280	0	0	0	1	0	0	47	33	26	0	0	0	0	1	0	26	22	6	0	0	0	1	2	0	41	19	7	0	0	0	5	1	0	27	30	0
AFUA_1G01300	0	0	0	14	39	9	696	569	530	0	0	2	27	42	9	615	466	438	1	1	3	30	21	8	686	304	125	0	4	8	73	74	23	714	447	77
AFUA_1G01310	0	0	0	1	3	0	42	51	28	0	0	0	0	2	0	34	26	10	0	0	0	1	1	0	60	22	0	0	0	0	5	6	0	26	28	0
AFUA_1G01320	0	0	0	0	0	2	55	24	10	0	0	0	2	0	0	30	13	9	0	0	1	4	3	0	24	8	0	0	0	3	2	2	1	15	16	0
AFUA_1G01330	63	25	36	34	29	58	227	127	124	11	12	21	52	37	48	165	114	87	6	6	13	47	26	36	159	166	88	24	23	29	49	46	44	205	144	53
AFUA_1G01340	550	384	574	88	101	103	280	195	171	244	196	158	86	76	141	171	183	164	329	112	305	108	82	133	207	141	239	494	532	491	90	84	78	96	228	108
AFUA_1G01350	2549	2201	3442	1575	2064	1007	657	1586	5608	1846	2007	2025	2254	2631	1078	1348	4889	5670	2739	4167	3153	2465	1529	1175	3269	555	9323	4034	5013	4333	2774	4912	851	1807	7476	5028
AFUA_1G01360	2283	1801	2115	833	1321	714	1157	1711	2625	2349	2165	2129	936	1064	843	1767	3142	2748	1678	2114	1523	993	918	1040	2560	1146	3482	2008	2162	2195	1379	2009	745	2388	4344	2309
AFUA_1G01370	1017	733	851	538	560	299	657	674	812	793	808	630	213	270	289	654	886	618	394	342	311	253	188	307	1038	777	970	546	586	683	265	260	343	742	941	619
AFUA_1G01380	76	73	79	1376	1118	1003	2062	1895	2715	25	19	33	659	851	965	1852	2373	2326	213	171	224	668	343	939	2298	2195	1832	127	82	69	379	460	631	672	2713	1305
AFUA_1G01390	199	164	195	413	457	199	543	434	397	119	125	92	131	152	219	418	442	296	232	76	214	218	162	225	490	373	493	142	173	168	189	115	157	303	464	170
AFUA_1G01400	97	45	99	160	148	85	187	133	142	48	26	22	57	45	77	122	129	122	77	32	49	76	52	87	211	131	185	74	66	71	60	59	46	116	185	42
AFUA_1G01410	635	496	609	1137	818	251	648	474	769	374	230	198	247	271	288	483	723	420	470	398	422	287	238	198	817	637	608	335	353	505	431	342	286	225	929	268
AFUA_1G01420	0	1	0	5	0	1	1	4	6	0	0	0	0	0	0	2	12	0	2	0	0	1	0	0	12	2	7	1	2	3	3	0	0	0	9	0
AFUA_1G01430	2	0	0	45	28	27	62	35	45	1	3	0	40	46	32	46	24	21	0	0	0	17	31	28	45	61	78	0	3	0	48	43	28	66	77	79
AFUA_1G01440	0	5	0	5	5	16	24	17	1	0	0	0	3	2	9	18	8	0	0	2	0	6	8	2	11	21	10	0	0	0	13	5	5	27	18	0
AFUA_1G01450	3	4	7	123	124	89	87	73	88	4	4	1	91	76	77	75	61	17	0	0	0	105	100	127	95	41	190	1	0	2	112	126	95	138	73	67
AFUA_1G01460	16	10	17	9	16	9	49	32	25	19	24	8	15	14	22	22	10	10	33	24	30	16	7	16	16	19	14	26	17	13	48	22	16	20	15	15
AFUA_1G01480	245	180	161	8	15	1	0	0	1	182	115	112	4	7	0	0	2	7	108	71	87	14	9	0	0	0	0	88	128	146	12	11	0	0	2	0
AFUA_1G01490	46152	48529	59272	211	192	52	88	113	522	39878	53854	51273	181	136	47	381	307	724	31288	34573	30352	358	195	69	94	56	428	38991	56069	46378	155	182	65	66	258	217
AFUA_1G01500	4946	4293	3676	8	8	0	0	1	5	8848	7821	5358	4	3	2	0	0	2	1498	2134	1443	2	4	4	6	0	8	2326	2999	2930	8	5	5	1	4	0
AFUA_1G01520	7	3	6	7	2	0	5	3	1	0	0	4	5	10	1	7	3	6	5	2	8	4	3	2	6	2	5	2	0	11	6	0	4	0	4	2
AFUA_1G01530	0	1	0	528	589	832	456	407	323	0	0	0	923	1056	753	506	391	303	0	0	0	764	531	799	299	255	368	0	0	1	773	849	726	539	371	605
AFUA_1G01540	3	0	0	111	49	84	170	97	60	0	1	0	188	160	92	114	71	59	0	0	0	206	123	122	262	104	134	0	2	1	140	179	54	232	69	54
AFUA_1G01550	243	155	131	183	167	59	517	403	255	78	98	58	113	112	92	470	426	178	38	44	36	158	166	131	616	197	416	84	75	129	142	176	105	749	388	118
AFUA_1G01560	333	176	346	1107	849	769	1480	1370	1512	135	206	122	819	784	840	1500	1431	1178	175	168	231	800	506	772	1117	644	1348	162	183	272	746	795	596	839	1221	1050
AFUA_1G01570	209	93	124	151	127	167	177	165	135	99	65	63	216	167	163	141	93	91	225	107	170	212	152	230	114	75	76	114	56	129	199	254	165	136	148	44
AFUA_1G01580	93	54	115	57	26	49	96	87	80	55	32	35	85	53	37	89	75	59	78	102	75	71	68	42	101	115	32	97	88	153	105	102	36	113	68	30
AFUA_1G01590	720	507	833	492	371	347	787	505	565	260	252	209	532	485	377	572	516	390	774	374	749	646	430	349	956	916	304	653	791	1049	488	539	306	394	481	202
AFUA_1G01600	18893	17683	29597	5566	6632	5074	1050	1381	2080	13805	17993	21153	8380	8504	7343	1222	2558	2542	15776	15925	11077	13678	9972	7641	2029	906	2757	28383	35903	33162	11505	15577	6645	1565	2997	1449
AFUA_1G01610	3041	2374	3808	803	800	861	262	316	640	1111	1417	1257	1366	1240	1251	396	657	953	3397	2798	2759	1517	897	1285	415	171	623	3481	2941	3305	848	1635	1163	535	1101	324
AFUA_1G01620	44	83	109	279	220	161	51	57	98	37	31	34	79	115	199	59	91	72	110	128	126	108	52	198	87	20	180	86	83	112	145	105	178	69	130	244
AFUA_1G01630	33	25	24	754	645	331	847	622	1241	13	26	10	328	362	313	728	936	1036	40	37	22	286	270	328	661	380	1650	21	23	15	432	410	298	584	951	1126
AFUA_1G01640	31	30	32	1147	795	1940	2065	1698	2093	8	9	11	2012	1677	1867	2081	2030	1529	73	48	49	2511	1384	2381	1942	1183	1334	37	20	30	1529	2101	1768	1550	1746	1306
AFUA_1G01650	7	0	4	28	15	75	66	73	41	0	3	11	67	52	74	80	56	54	5	3	2	95	50	67	80	30	38	6	4	9	46	37	36	97	60	29
AFUA_1G01660	86	40	53	72	51	143	226	169	122	55	59	43	118	106	130	185	143	92	70	54	75	213	175	252	221	105	89	34	26	55	155	142	185	262	140	59
AFUA_1G01670	51	29	58	59	91	83	197	135	153	67	49	33	70	86	90	199	131	84	57	43	63	115	68	95	193	56	154	30	33	57	74	72	59	78	82	57
AFUA_1G01680	720	438	751	1293	1364	1545	3342	2162	2273	319	326	347	2017	2096	1588	2966	2088	1554	1048	1126	891	2493	1849	2077	3134	1597	1774	554	481	722	2018	2234	1705	2334	1866	1793
AFUA_1G01690	113	25	95	7613	6174	3797	7361	8238	18022	41	24	22	2968	4327	3829	14230	17329	16236	86	62	38	2544	1948	3020	12089	9578	16406	54	42	66	2402	2918	2004	3408	20892	15986
AFUA_1G01700	71	32	65	1176	1778	591	1471	1566	2213	38	27	15	665	641	696	2033	2614	2073	86	56	82	753	549	647	2235	1168	2358	56	39	45	529	548	416	1069	3791	2272
AFUA_1G01710	3	0	2	12	14	6	14	34	24	1	0	0	6	8	15	28	45	5	1	2	4	12	4	5	32	26	16	1	1	1	3	4	4	11	54	12
AFUA_1G01720	459	338	458	4624	4317	3319	5364	4664	6352	217	202	169	2401	2743	3619	4626	5538	5755	467	212	407	3166	2662	4087	4904	4835	6536	239	160	245	1952	2276	2961	3925	7901	4401
AFUA_1G01730	732	628	758	1075	1192	415	184	247	324	362	343	289	821	889	397	291	300	333	310	276	258	717	391	368	179	86	343	548	574	615	283	558	238	144	344	277
AFUA_1G01740	1792	1328	1997	1917	2166	2744	1935	1620	2359	862	726	567	3135	2638	2558	1801	1901	2208	1430	1084	1482	4338	2235	3414	2136	1976	2007	1163	893	1173	1974	2883	2679	1798	2409	1252
AFUA_1G01750	498	249	480	647	638	683	497	351	355	207	153	127	851	816	758	353	285	367	421	312	371	1092	631	934	317	219	326	306	217	254	656	824	753	333	389	222
AFUA_1G01760	687	696	1002	1409	1509	1871	5060	4173	4141	374	471	422	1474	1637	2016	4083	4076	3292	792	632	890	2302	1578	2037	4962	3148	2829	889	848	719	1645	1700	1429	2773	3315	2285
AFUA_1G01770	194	163	187	390	540	423	1376	940	1225	89	79	90	425	497	429	1179	1063	775	69	85	65	398	336	542	1063	625	1347	68	91	136	465	569	463	643	970	741
AFUA_1G01780	74	19	35	141	287	307	473	337	259	54	35	21	200	197	328	330	267	156	36	34	22	279	146	292	288	159	303	16	29	18	238	187	382	217	298	163
AFUA_1G01790	298	174	183	897	1101	1110	839	668	695	393	232	163	1220	1141	1124	763	652	526	201	161	166	1491	1010	1486	925	507	833	94	93	148	1315	1544	1288	739	778	347
AFUA_1G01812	119	94	112	466	661	684	493	453	322	84	45	63	1174	909	688	625	322	257	51	44	62	1034	596	730	273	120	579	55	56	79	709	937	486	451	390	506
AFUA_1G01820	130	72	87	8	25	6	25	12	12	43	47	38	14	14	8	10	4	1	44	25	31	20	29	8	12	20	25	24	47	48	17	8	12	33	15	1
AFUA_1G01830	180	134	182	299	306	194	217	174	222	99	102	85	292	283	218	233	170	183	99	103	89	300	168	259	232	230	254	148	167	199	193	241	180	176	311	149
AFUA_1G01850	2878	2470	2639	1323	1323	671	1271	1097	2591	3804	3541	2692	697	691	910	1250	2005	1844	1059	951	981	1036	788	918	2048	1171	4987	1842	2577	2488	735	821	681	1163	2359	2191
AFUA_1G01860	594	421	489	504	632	456	908	767	1104	570	513	427	392	420	554	874	1024	1000	226	224	222	502	317	676	891	639	1575	334	518	428	316	471	446	754	1283	730
AFUA_1G01870	1989	1816	2512	1115	1039	1486	1824	1435	1897	855	782	908	1272	1243	1420	1462	1402	1491	1809	1243	1622	1949	1287	1798	1535	1174	1497	1951	1549	1554	1272	1756	1465	1800	1858	1028
AFUA_1G01890	203	115	133	92	89	155	700	562	381	54	64	86	270	202	253	591	384	314	155	130	146	431	334	273	317	299	236	117	133	146	529	612	208	634	618	234
AFUA_1G01900	149	124	74	29	57	61	282	190	148	105	38	30	64	51	51	244	176	110	47	24	40	112	76	82	207	97	142	12	28	27	91	94	57	305	188	127
AFUA_1G01910	860	618	502	272	303	313	1164	907	718	601	500	309	331	240	285	949	619	432	289	204	300	387	226	394	1114	658	442	283	358	313	335	359	321	891	609	309
AFUA_1G01920	39	36	17	1613	1688	395	1263	1900	1817	32	19	23	369	627	400	2503	1910	1216	10	6	3	205	163	270	1363	468	2480	10	21	16	173	228	216	950	2051	1580
AFUA_1G01930	39	27	18	106	95	90	342	276	190	8	20	14	161	170	114	257	184	151	3	0	2	127	76	152	180	259	231	14	18	12	77	138	60	223	255	150
AFUA_1G01940	280	240	228	328	264	364	729	631	973	392	348	284	446	362	367	850	952	763	212	173	208	551	253	348	766	746	624	149	209	90	406	474	316	536	923	632
AFUA_1G01950	1809	1678	2106	695	892	435	2750	1628	1560	1276	1451	1701	698	752	488	1585	1373	1292	1715	1717	1732	1057	1139	596	2509	6046	1145	1300	1228	1157	1193	1337	519	2105	1429	782
AFUA_1G01960	6937	5004	5725	1954	1814	2463	2938	1939	1323	5919	5984	4433	1952	1764	2277	2196	1513	945	3240	2732	3261	1864	1141	2735	2312	4601	688	4080	5732	5647	1194	1678	1479	865	2953	322
AFUA_1G01970	2667	2361	3053	698	726	644	1072	798	615	2194	1950	1819	688	680	590	800	487	431	2050	1873	1954	751	511	709	660	831	512	1789	1835	1714	526	533	463	849	612	284
AFUA_1G01980	402	305	357	77	79	23	24	28	55	542	400	462	31	27	20	47	44	47	190	169	188	32	10	20	80	32	25	176	249	220	35	35	24	34	62	2
AFUA_1G01990	658	1006	1311	628	453	409	705	873	2367	137	130	117	543	471	495	1273	2049	1972	453	221	414	509	238	676	2204	2579	1617	272	306	362	164	447	458	346	2313	488
AFUA_1G02000	753	409	512	132	111	134	480	349	200	239	144	106	111	110	181	334	216	127	383	181	358	159	104	156	251	320	148	339	383	436	111	117	119	395	301	79
AFUA_1G02010	2015	1578	2255	1414	1756	1656	1749	1642	2460	1143	1024	945	1899	1683	1785	1804	1977	2017	1371	1007	1334	2679	1518	2031	2229	1334	1697	1351	1325	1863	1449	1907	1650	1224	2015	1116
AFUA_1G02020	2695	1623	2078	980	1270	920	859	780	724	1754	1202	864	900	912	988	675	701	411	1294	890	1336	1206	842	1062	645	694	507	1240	1355	1689	909	975	738	783	699	295
AFUA_1G02030	2243	2322	3486	4734	4352	4785	2663	2359	4413	1228	1099	1285	6151	5705	5287	2643	3343	4185	2837	1904	2679	8098	4500	6355	3704	3136	2997	2333	1855	1912	3305	5040	5181	1752	4513	2245
AFUA_1G02040	2042	2103	2387	961	1053	684	752	1282	2135	1841	2440	2855	550	614	992	1204	2328	2046	1979	2798	1732	513	392	973	1527	703	2299	2370	2998	1883	538	1023	705	1295	3224	1566
AFUA_1G02050	1226	914	1284	743	716	1014	1112	911	907	530	484	466	1014	881	969	840	858	706	1330	815	1118	1215	708	1221	819	621	675	1105	1001	982	660	904	834	756	918	382
AFUA_1G02060	1054	762	639	133	167	118	179	161	154	619	535	331	112	115	112	126	135	115	117	109	138	133	99	187	156	110	152	101	117	220	109	127	158	274	275	93
AFUA_1G02070	3022	2243	2589	6226	5707	7703	3672	3473	7098	2259	1878	1403	8283	8428	7949	3622	5331	7191	1420	1184	1298	9770	6811	9752	4484	3772	6044	786	852	1011	5938	7431	8370	3594	7227	4647
AFUA_1G02080	1041	665	682	514	592	536	1498	964	812	951	758	552	486	496	462	1014	802	697	533	304	338	624	525	586	1063	956	881	316	349	394	646	532	527	983	998	697
AFUA_1G02090	2747	2224	2241	1732	2406	963	744	754	1376	3557	2606	2195	974	982	929	725	982	1061	1097	1332	972	1275	1056	1041	800	919	1338	1234	1770	1750	1473	1474	828	804	1509	1156
AFUA_1G02100	415	314	360	391	479	193	743	537	360	215	236	178	258	310	212	575	437	243	318	199	239	306	227	210	540	569	246	188	185	229	247	349	142	451	550	118
AFUA_1G02110	1490	1035	1836	3425	4575	2714	1401	1145	2309	461	434	409	3888	4346	2840	1385	1741	2011	1511	824	1219	3378	2310	3442	2050	2233	2656	1143	925	1174	1557	2574	2455	774	2417	1584
AFUA_1G02120	2559	2100	2521	657	1071	489	1096	741	464	3218	2780	2452	378	503	648	628	460	245	1664	1520	1761	537	495	661	591	793	700	2299	2746	2171	609	552	732	619	964	268
AFUA_1G02130	6514	5750	8463	1152	1604	1657	1115	1135	1822	4608	5071	5240	1016	1026	1517	1039	1607	1342	5131	2305	4744	1378	830	1627	1531	1112	1776	7841	8839	7956	1255	1095	1368	580	1780	1206
AFUA_1G02140	4428	3524	5289	3290	5038	4359	1831	4143	7420	3502	3271	2624	3908	3594	5593	3520	8269	7119	2733	2037	2535	6657	3985	4736	5124	1614	11005	6325	8711	6936	3463	5160	2459	2529	7846	4253
AFUA_1G02150	1477	1355	1457	1845	1797	2554	2425	1986	2604	1155	1267	995	2401	2185	2797	2020	2349	2135	1121	917	924	2551	1433	2912	2414	2960	2407	1127	1326	1418	1403	2018	2330	1457	3108	1675
AFUA_1G02160	2404	1986	2526	560	689	653	799	714	1123	2265	1838	1501	454	450	743	735	988	776	1450	1031	1168	617	349	697	1164	1265	882	1285	1412	1690	286	420	562	403	1239	457
AFUA_1G02170	2377	1730	1906	881	1121	1007	2476	1778	1273	2349	1868	1418	1188	1080	1154	2146	1357	1126	1872	1447	1753	1608	1195	1255	1708	1620	1176	1689	1665	2020	1874	2106	926	2373	1641	800
AFUA_1G02180	786	698	975	368	419	391	655	442	415	217	203	191	432	352	370	443	427	302	516	389	520	520	276	383	409	296	347	719	735	820	267	399	306	412	403	221
AFUA_1G02190	5362	3864	5457	3317	3685	3940	4627	3660	4428	3286	2816	2433	4891	4494	3959	4012	4000	3722	4625	3163	4125	5788	3721	4633	3901	3714	3117	3814	3389	3222	3930	4881	3622	4037	4354	2783
AFUA_1G02200	623	720	1002	1181	1305	913	1524	1300	1751	176	202	245	1349	1404	791	1388	1543	1338	1797	1278	1502	1336	899	1027	1448	958	1545	918	662	658	714	1182	631	920	1658	954
AFUA_1G02210	580	808	1078	1062	1584	1077	746	729	1782	184	100	138	1402	1268	1027	958	1493	1668	1126	752	971	1491	704	1466	1725	1825	1535	476	348	402	398	1007	898	439	1761	1110
AFUA_1G02220	480	301	330	140	162	116	166	139	138	258	144	106	178	122	96	150	78	57	183	177	151	168	95	91	170	135	97	191	275	199	190	247	124	145	164	77
AFUA_1G02230	38	32	11	18	24	8	20	18	8	8	11	9	17	11	6	22	7	16	12	14	9	22	22	13	14	10	16	20	8	16	17	40	6	34	10	6
AFUA_1G02240	0	0	2	2	0	2	7	3	11	0	0	0	11	1	1	2	1	5	4	0	0	9	2	5	4	4	0	0	0	2	0	26	5	4	2	0
AFUA_1G02250	0	0	0	3	0	0	1	0	0	0	0	0	0	1	0	0	0	0	0	0	0	2	1	2	0	1	0	0	0	0	0	0	0	0	0	0
AFUA_1G02255	0	0	0	7	11	5	23	10	21	3	0	0	23	22	15	28	30	21	0	0	2	46	9	25	25	2	10	0	0	0	13	18	4	15	30	2
AFUA_1G02260	7	0	1	10	12	11	15	14	32	0	0	0	8	13	9	26	31	19	0	0	1	6	5	16	27	31	12	0	0	0	4	9	3	0	25	6
AFUA_1G02270	183	144	188	2774	3748	1986	2846	3657	3635	68	61	39	938	1373	2085	3033	2999	3031	159	104	162	919	585	1837	2562	2643	3906	145	138	167	665	835	1102	645	3337	2703
AFUA_1G02280	1633	1318	1670	509	733	583	761	710	992	1303	1293	853	478	386	489	802	1020	881	1466	692	1262	660	339	524	1138	816	781	1406	1507	1307	381	455	303	556	1071	612
AFUA_1G02290	477	350	428	10373	9052	41356	17185	16254	17252	482	444	294	29634	22985	35242	13077	14786	14027	228	342	239	34983	21760	54158	16329	10149	13375	299	370	355	25822	28732	39401	26120	15993	11867
AFUA_1G02300	7	7	4	1	6	9	2	9	7	1	4	0	3	2	1	1	4	4	0	1	3	12	8	3	5	2	0	1	1	5	8	6	1	6	4	1
AFUA_1G02310	0	0	1	53	79	56	311	205	175	0	0	0	213	140	46	81	104	80	0	0	0	346	204	112	206	164	45	0	1	0	145	316	85	411	181	55
AFUA_1G02320	289	219	236	215	211	162	575	475	365	287	292	262	423	311	182	264	323	317	111	125	113	555	432	296	447	452	228	155	176	226	349	570	214	842	542	238
AFUA_1G02330	1548	1395	1218	1968	2117	701	1194	1015	1903	1519	1183	964	1061	1340	790	1018	1388	1984	701	599	625	1200	1093	945	1598	2295	3953	697	851	787	1206	1163	722	846	2748	1862
AFUA_1G02340	1111	1054	1547	4612	5468	2794	3544	3409	9937	704	765	736	2116	2843	3059	3398	7075	10460	1083	637	818	2294	1915	3792	8560	10752	16842	915	985	932	1629	1630	2850	1679	11989	7386
AFUA_1G02360	1048	663	936	279	324	311	723	594	470	354	260	217	444	411	354	544	402	374	504	308	513	461	309	338	473	440	470	566	666	834	354	411	293	557	556	294
AFUA_1G02350	174	109	256	220	171	103	107	102	100	65	44	32	136	151	79	115	117	93	95	45	85	163	117	116	137	82	143	172	169	234	139	126	92	100	125	54
AFUA_1G02370	161	70	117	89	50	84	112	81	84	41	26	17	105	116	85	79	81	68	55	49	52	94	74	77	92	78	86	48	91	41	69	106	72	92	101	62
AFUA_1G02380	74	36	34	50	38	55	107	132	176	31	7	8	81	70	67	111	128	135	42	33	19	66	47	74	88	69	133	12	16	14	54	84	55	125	165	73
AFUA_1G02390	1628	821	977	363	395	535	385	305	260	442	198	180	373	332	375	257	247	176	357	261	362	579	327	545	263	384	256	550	580	682	354	415	429	300	407	115
AFUA_1G02400	598	458	566	908	854	685	1318	1038	1320	302	294	251	845	739	693	1121	1170	922	756	491	768	774	385	801	1438	990	832	400	406	372	332	641	508	609	1231	440
AFUA_1G02410	1079	919	1265	858	955	1829	1168	920	1156	459	437	376	1668	1542	1754	881	1053	968	2350	1416	2190	2356	1182	2119	1136	882	747	1147	920	689	989	1549	1645	953	1101	524
AFUA_1G02420	682	703	1050	392	382	610	636	477	586	401	551	741	682	583	636	505	585	448	2016	2132	1762	905	476	913	689	404	542	933	792	622	470	642	588	577	719	329
AFUA_1G02430	5227	3451	4069	1496	1833	1525	1614	1429	1992	4447	3934	2701	2067	2001	1603	1637	1949	1622	2303	2245	2149	2522	1630	1815	1887	1066	2074	2535	2991	3171	1685	2424	1376	1780	1930	1252
AFUA_1G02440	87	85	70	110	72	69	218	211	209	64	89	59	108	103	46	210	173	219	35	33	44	122	80	51	308	311	170	41	56	65	88	100	49	109	291	141
AFUA_1G02450	464	423	413	410	396	144	591	470	442	430	468	335	310	275	206	492	348	273	236	190	215	296	279	191	526	558	438	228	235	279	336	488	144	449	590	195
AFUA_1G02460	1955	1729	2421	805	1089	976	889	667	1462	859	653	601	550	647	977	708	1144	1039	1240	591	1042	719	438	1229	1437	1298	1184	899	959	1180	295	480	754	389	1325	614
AFUA_1G02480	605	582	663	138	177	93	215	129	129	410	375	351	101	99	106	112	95	55	655	374	571	213	133	183	112	202	115	325	457	436	192	212	100	173	190	74
AFUA_1G02490	10427	7167	8078	813	1063	505	669	563	872	6649	5504	3842	420	426	348	418	582	384	2567	2166	2563	639	412	498	756	615	615	4985	7050	6969	598	760	456	533	875	297
AFUA_1G02500	501	263	416	407	368	582	529	400	422	182	188	112	828	604	655	480	413	323	449	329	449	825	528	727	460	258	276	317	293	449	599	781	626	354	436	220
AFUA_1G02510	1009	786	1130	1675	2423	2429	3554	2525	1590	555	454	436	3399	2972	2582	2268	1635	1250	380	166	382	3462	2123	2600	1830	1069	1301	542	638	677	2055	2145	1998	1698	1663	926
AFUA_1G02520	2	0	3	16	13	3	7	4	4	0	0	0	15	4	5	3	1	4	0	0	0	11	10	6	6	5	4	0	0	0	10	8	4	8	6	0
AFUA_1G02530	579	410	594	519	474	187	412	357	295	347	388	355	408	413	232	415	284	243	350	375	332	500	400	251	544	365	314	434	465	713	397	437	235	471	310	185
AFUA_1G02540	2935	1995	2893	2599	3223	2841	3434	2713	2723	1782	1773	1344	3124	3057	3175	2736	2194	2067	1471	783	1356	3805	2526	3112	2406	1893	3134	1831	1922	2296	3086	2968	3023	2767	2899	2299
AFUA_1G02550	459	169	280	11194	10159	15728	7341	6907	10528	179	105	100	20707	18213	18715	7266	8016	10692	254	151	215	25550	15960	21447	7591	5814	5278	233	165	241	15440	20090	18473	8490	12151	4450
AFUA_1G02560	1864	1137	1414	449	622	925	369	289	371	1150	1074	887	957	710	1071	303	297	350	1327	1489	1276	714	450	983	249	219	325	1384	1516	1883	495	1005	972	381	457	225
AFUA_1G02570	4104	3080	4667	15678	33409	13881	3810	12616	30859	2604	2581	2219	14886	18059	17959	8189	26990	32037	3639	2448	3319	21086	15286	17876	20669	25169	46677	4737	5272	5130	16778	20607	12476	7497	42395	27128
AFUA_1G02580	218	227	285	3135	5346	3744	1837	2789	4298	166	150	95	2129	3354	4738	2082	3565	5035	343	339	292	2542	2090	5502	2703	4986	6263	234	271	215	2382	2835	3564	2676	8185	4486
AFUA_1G02590	557	770	971	1491	1964	1093	1131	1113	2390	263	226	239	771	941	1287	1477	1911	1952	836	568	824	848	530	1535	1958	2937	2417	508	417	443	368	661	805	594	2546	1254
AFUA_1G02600	3429	5434	8310	2473	2203	1465	5701	4775	3879	1937	2962	4076	2784	2414	1683	5252	3950	3242	5490	5345	5015	3328	1854	2269	5917	3738	1732	4502	4003	3111	2056	2728	1518	6980	3496	1097
AFUA_1G02610	359	358	592	1306	1339	902	2484	1993	2538	74	70	76	1591	1615	1112	2684	2397	2025	616	484	485	1731	747	1323	2839	2593	1255	266	255	259	718	1748	977	1723	2783	643
AFUA_1G02620	678	641	773	538	614	708	529	379	427	293	210	207	591	538	582	493	493	369	1251	900	1088	496	357	776	447	383	322	573	405	406	479	578	623	342	582	177
AFUA_1G02630	238	317	499	1070	1208	957	1212	1062	2283	40	39	32	1535	1228	1053	1449	1886	1743	390	208	287	1803	988	1589	2538	2113	1242	157	75	131	469	1363	966	815	2156	822
AFUA_1G02633	0	0	0	1	0	0	1	0	0	0	0	0	1	1	0	0	0	1	0	0	0	3	0	1	0	2	1	0	0	0	0	0	0	0	0	2
AFUA_1G02636	1	0	0	0	9	1	8	4	1	0	0	4	1	1	6	3	6	1	3	6	1	6	2	9	4	10	3	3	2	0	7	15	1	8	1	0
AFUA_1G02640	1238	853	1235	970	1121	764	1389	1157	1257	663	597	560	841	851	879	1145	1118	979	1550	979	1362	858	501	948	1166	701	1033	1180	982	1034	576	727	629	719	1185	572
AFUA_1G02650	760	455	564	211	270	191	452	282	220	438	310	211	182	207	227	295	273	143	278	194	239	273	167	253	285	203	190	276	285	294	217	262	197	329	352	49
AFUA_1G02660	12	6	8	80	117	37	21	10	20	3	0	4	129	82	32	16	9	12	5	3	3	107	42	52	12	7	22	0	3	2	43	83	28	13	20	2
AFUA_1G02670	2349	2024	2478	1870	1691	2845	2546	2227	2546	1567	1364	1315	2812	2360	2822	2342	2465	2285	2103	1669	1758	3827	2487	3568	2015	1791	1851	1402	1438	1582	2733	3232	2868	2437	2699	1260
AFUA_1G02680	1752	1385	2365	660	758	1028	631	480	1233	575	441	466	612	687	1105	566	1122	1017	1299	635	1202	703	390	1275	1151	1130	1028	1151	1117	1414	410	492	935	292	972	571
AFUA_1G02700	973	583	678	355	539	312	1413	1015	1142	585	397	262	314	394	392	1114	960	881	363	244	330	341	316	401	834	777	1421	403	460	505	384	346	286	964	1803	1040
AFUA_1G02710	4279	3196	4773	659	953	748	1538	1193	1523	2065	2145	1665	1032	1088	861	1266	1488	1353	3821	2892	3520	1294	854	914	1463	1450	1342	3592	3551	4015	958	1320	639	1145	1639	1131
AFUA_1G02720	477	393	423	1065	1199	449	993	701	704	202	177	118	608	613	476	735	671	478	348	191	238	513	310	556	646	700	655	282	252	317	431	542	499	687	672	349
AFUA_1G02730	2	1	0	281	290	244	63	61	147	0	1	3	466	412	227	82	134	156	0	1	0	242	171	210	68	86	222	3	1	0	169	318	263	42	155	88
AFUA_1G02740	0	0	0	5	7	0	2	3	2	0	0	0	7	6	3	0	1	0	0	0	0	6	2	3	1	2	1	0	0	0	4	9	3	2	10	13
AFUA_1G02750	0	0	0	5	7	2	1	2	0	0	0	0	1	2	0	2	2	0	0	0	0	5	1	0	0	0	0	0	0	0	0	7	1	0	0	2
AFUA_1G02760	319	244	508	2824	3345	1346	2385	2121	2718	173	139	197	1206	1292	1246	1894	2171	1938	489	153	397	1663	959	1155	2429	2333	2926	604	401	461	1072	992	1035	1159	2228	1844
AFUA_1G02770	2629	2052	2237	1542	1510	1164	5196	4899	5936	2719	2569	1614	1863	1906	1110	5172	4185	3290	1002	1075	1022	2668	2542	1482	6512	11748	9647	1652	1890	1921	4620	6029	848	5117	8329	7131
AFUA_1G02780	234	101	142	172	234	192	118	72	86	72	80	47	286	267	155	87	78	70	163	106	159	167	156	176	65	153	136	99	95	162	217	281	230	50	151	58
AFUA_1G02800	2633	1613	1891	1080	1380	945	2713	2038	1592	2183	1608	1111	1570	1376	1044	1994	1522	1079	1273	1001	1045	1421	961	1111	1906	2085	1345	1280	1439	1547	1661	2052	1047	2178	1844	793
AFUA_1G02810	520	544	751	589	736	442	710	572	760	283	306	268	523	610	533	573	575	493	950	811	1006	372	236	514	684	470	586	519	367	452	348	505	397	338	646	407
AFUA_1G02820	3409	2302	3240	8008	12759	5147	1113	1216	3970	2081	1816	1531	10660	12302	5403	2040	3200	3327	5630	4603	5298	3040	2599	423	591	753	783	3124	2372	1990	13766	18493	3064	517	3718	5254
AFUA_1G02830	8686	5484	8204	1318	1857	1599	1523	1316	1816	7718	7287	5875	1846	1760	1638	1367	1670	1791	2954	1833	2712	2211	1375	1691	1332	931	2117	5681	7060	7601	1820	2017	1462	1226	1917	1343
AFUA_1G02840	135	92	110	656	721	786	964	849	839	79	71	70	991	855	910	945	754	748	137	88	98	1185	673	937	894	502	567	104	104	131	776	907	737	649	868	376
AFUA_1G02850	1957	1078	1142	383	592	456	2316	1449	919	1883	1483	924	725	613	492	1569	1040	816	800	704	768	855	773	513	1491	1350	662	752	751	807	1369	1531	533	2036	1239	407
AFUA_1G02860	383	195	195	88	103	55	169	106	37	253	236	123	31	46	45	115	61	23	70	59	64	29	24	40	81	68	35	83	123	142	36	36	34	112	92	25
AFUA_1G02870	93	62	94	980	998	719	1560	1186	657	94	27	20	1364	1083	738	1136	590	454	53	38	105	997	508	851	803	561	840	82	80	70	682	741	589	794	818	676
AFUA_1G02880	195	74	124	314	356	872	1010	980	939	86	88	37	1189	768	731	993	942	777	161	139	193	1182	766	900	808	804	666	54	78	48	1044	1012	753	1134	1000	728
AFUA_1G02890	125	71	112	1367	1426	3346	1142	1037	1085	80	42	31	3714	3037	3541	1144	1140	1340	283	191	246	3522	2041	4805	740	758	589	85	72	112	1744	3020	3126	1287	1775	502
AFUA_1G02900	91	83	98	1032	1164	439	225	261	471	36	22	9	539	587	537	209	336	345	112	72	81	470	231	555	308	311	738	42	29	55	239	393	384	113	495	398
AFUA_1G02910	30	46	24	3854	4403	1964	1664	1417	2402	37	14	12	1663	2209	2176	1267	1600	1738	39	32	19	2052	1203	2482	1822	974	3664	12	9	8	1424	1383	1736	1286	1313	1773
AFUA_1G02920	268	182	232	618	728	518	542	408	525	125	84	69	641	552	471	459	531	374	219	106	184	640	342	540	580	271	523	118	132	103	352	312	408	364	410	234
AFUA_1G02930	147	87	146	934	1167	635	430	471	439	44	19	27	959	988	628	468	428	362	215	194	175	940	649	713	405	291	237	113	77	114	610	932	536	403	479	229
AFUA_1G02940	554	470	637	597	659	389	655	540	743	295	221	184	404	483	412	579	580	545	416	280	368	567	305	385	783	523	450	396	400	446	417	452	346	404	608	207
AFUA_1G02950	249	105	107	10348	12680	3423	6386	5742	7231	111	102	77	3719	4870	4714	6894	5961	5898	107	106	100	4582	3791	4992	6285	5590	8501	128	120	168	4472	5792	3428	4218	8564	4965
AFUA_1G02960	42	22	21	1162	1739	592	1117	1011	1001	23	17	7	440	534	832	1036	979	818	15	15	15	602	430	697	1049	741	1176	18	24	46	531	459	492	501	1125	450
AFUA_1G02970	123	70	93	6319	5168	3085	3700	3161	3915	46	59	36	1961	2284	3096	3198	4111	2964	86	72	83	3317	2432	3512	3086	1989	4225	92	78	127	3318	3827	2238	2085	3298	2894
AFUA_1G02980	2704	3113	4939	2246	2703	3967	2779	3682	4628	1728	2518	3234	4642	4532	4508	3402	4472	4305	4630	5481	4662	6522	4196	5955	3237	1951	6536	5217	4560	2943	5609	6305	4783	4656	6281	4942
AFUA_1G02985	572	424	430	709	570	1054	1107	1106	782	265	291	276	670	697	969	855	804	684	588	492	504	1038	672	1214	685	434	645	548	445	546	564	681	846	740	654	545
AFUA_1G02990	8372	7081	10494	2087	2523	1416	1500	1681	2728	5219	5869	5743	1496	1494	1647	1496	2612	2571	5756	4190	5061	2548	1634	1812	2085	1696	3366	8750	9782	9691	1546	1999	1524	1500	3228	1657
AFUA_1G03000	268	182	279	595	643	506	531	469	1013	147	180	158	563	475	520	694	947	686	450	357	474	589	298	585	1361	1144	777	411	265	385	238	504	385	295	1133	518
AFUA_1G03010	9670	7820	9483	1001	940	934	2099	1523	1590	10220	11325	9255	1143	1022	1147	1594	1383	1449	7515	5849	8229	1527	980	1349	1799	1207	1115	12645	15254	14013	906	1035	995	1275	1573	942
AFUA_1G03020	3539	2571	2931	976	1092	1164	657	570	574	5414	4851	4246	1187	1151	983	568	609	463	2640	2005	3366	1173	738	1298	490	459	543	3841	4813	3604	898	1337	1082	746	750	384
AFUA_1G03030	5674	4270	6805	2048	3132	2515	7884	6301	4522	3873	4890	4487	2414	2567	2655	5514	4309	3946	6512	4485	7587	3632	2599	2889	4675	3977	4066	10035	10455	9206	2679	3010	1980	3888	5311	2266
AFUA_1G03035	574	377	752	613	581	620	439	393	442	365	372	421	812	720	673	500	388	351	1299	1249	1126	769	505	791	422	197	448	791	559	634	556	711	659	392	659	369
AFUA_1G03040	4701	4695	6250	29270	34243	22027	17540	15732	27168	3097	3251	3601	18557	22288	24658	15691	20273	22534	5265	4721	4880	26497	24757	26502	16815	19453	43346	5316	4890	3260	36178	31525	26749	20918	31916	31762
AFUA_1G03050	1581	946	1433	7553	8790	3449	2392	3397	3568	920	625	520	1343	2130	4236	2704	3299	3300	1742	1139	1658	2360	2184	3911	2066	2124	5548	1265	1186	1218	1348	1520	2382	1190	4281	3410
AFUA_1G03060	1383	821	1215	1789	1768	2227	1940	1669	1925	482	384	341	2506	2461	2420	1841	1527	1824	882	896	843	3224	2019	2993	1468	1468	1554	790	770	925	2372	3008	2321	1874	1992	1452
AFUA_1G03070	5027	3445	5150	1614	1824	1612	1521	1288	1627	2443	2241	1822	1625	1748	1656	1296	1344	1348	2991	2256	2887	2005	1235	1829	1476	1181	1324	4084	4084	4871	1535	1603	1546	1002	1611	985
AFUA_1G03080	1288	855	1294	459	536	505	564	460	342	412	419	339	479	378	484	491	315	201	555	647	520	490	381	441	307	378	269	862	798	1547	485	607	408	444	465	227
AFUA_1G03090	31409	25759	44031	3793	5054	2748	1325	2379	8280	19678	28777	33375	4781	4779	3199	1933	6450	7559	28424	30476	31152	8112	7772	3180	5077	2134	16518	47554	47359	47341	11791	14335	2862	3038	8784	9119
AFUA_1G03100	2498	1898	2360	3264	2675	5297	2419	2384	3890	1815	1328	1237	5261	5110	5138	2697	3051	3573	2524	2345	2188	5490	3422	6275	2664	2140	2549	1415	1239	1328	4108	5557	4900	3027	4175	2914
AFUA_1G03110	5967	5017	5775	6526	6206	10702	3246	3352	4433	5894	4432	4702	12896	9947	8806	3047	3873	4664	7271	6481	5842	14181	8674	14351	3338	3481	2354	3499	3155	2824	7576	13157	10473	4818	5686	1752
AFUA_1G03120	412	238	279	427	464	554	639	536	730	272	293	270	796	633	554	681	672	644	154	110	135	860	543	740	681	385	841	100	141	213	594	667	617	588	751	524
AFUA_1G03130	1498	1123	1549	1260	991	1011	955	827	1494	1081	1253	931	1065	1208	1209	893	1143	1229	1782	1457	1851	1445	969	1407	1060	771	1673	1389	1049	1011	944	1025	1005	728	1465	916
AFUA_1G03140	1175	822	903	302	283	263	481	305	279	1072	1069	799	346	304	265	362	274	222	457	441	483	417	292	264	200	237	331	448	533	708	359	361	244	363	353	114
AFUA_1G03150	729	594	818	9963	9938	2123	490	1056	5573	1257	1555	1126	1616	2357	2504	1632	4516	4634	1165	1030	1389	2311	2173	1961	4483	5911	2907	539	586	638	2677	2936	1774	406	7814	1380
AFUA_1G03160	19	17	11	171	160	50	104	99	105	12	6	12	219	165	79	113	144	91	18	20	23	121	84	91	109	92	166	6	6	11	121	211	57	56	109	201
AFUA_1G03170	603	430	593	331	529	141	81	96	94	203	204	166	376	362	160	77	93	63	223	108	164	376	259	147	82	43	72	287	370	414	281	462	105	74	55	56
AFUA_1G03175	8	3	2	0	1	0	0	0	0	9	9	5	0	1	0	2	0	0	3	4	0	1	0	0	0	0	0	0	8	4	0	2	0	0	0	0
AFUA_1G03180	108	70	85	439	418	99	77	99	386	60	36	19	523	394	98	225	401	215	46	49	44	308	117	75	265	255	376	65	71	56	331	436	74	67	383	599
AFUA_1G03200	0	0	0	325	260	219	3	8	103	0	0	0	69	85	220	3	54	72	0	0	0	166	185	198	36	12	58	0	0	0	202	147	202	3	52	73
AFUA_1G03190	1	1	0	67	99	21	79	85	82	2	1	1	15	34	20	106	90	39	7	0	1	26	7	20	79	55	54	2	1	0	16	13	6	40	92	15
AFUA_1G03210	12	25	26	450	552	156	260	213	654	9	6	16	226	221	176	288	501	418	20	9	8	132	63	121	453	251	537	5	14	8	86	106	93	86	407	366
AFUA_1G03220	3	7	7	8	0	0	47	29	28	7	3	6	2	7	3	28	17	16	1	2	3	5	2	0	24	29	0	5	10	15	3	13	0	23	30	2
AFUA_1G03230	11	10	20	9	9	5	212	142	102	6	12	7	14	11	4	114	90	61	4	10	10	8	7	2	95	138	7	12	15	16	13	37	4	150	110	30
AFUA_1G03240	4	15	11	10	3	3	87	47	33	13	2	1	7	4	1	46	40	14	9	2	5	5	6	0	29	53	1	15	15	4	5	6	0	37	47	4
AFUA_1G03250	0	1	1	17	20	3	476	311	89	0	0	1	18	12	6	236	100	61	2	0	3	23	9	8	175	166	38	2	0	0	42	58	3	263	96	46
AFUA_1G03260	0	0	0	4	0	0	24	6	0	0	0	0	0	0	0	11	9	1	0	0	0	2	0	0	1	7	0	0	0	0	6	2	1	2	0	4
AFUA_1G03270	26	15	14	2	6	1	0	9	5	30	24	17	2	0	0	3	4	2	23	4	10	2	3	4	2	3	0	7	5	8	10	5	0	5	0	4
AFUA_1G03280	57	23	19	14	15	21	41	26	19	22	5	16	33	22	16	37	21	4	11	2	8	19	29	39	45	23	11	11	18	22	25	28	17	57	15	5
AFUA_1G03290	13	5	4	3	8	9	11	8	2	4	4	1	2	7	16	12	4	5	8	0	2	10	9	7	10	6	0	10	3	16	10	8	3	9	4	2
AFUA_1G03300	41	20	29	17	60	33	67	47	34	7	6	9	59	42	54	60	42	20	4	1	9	61	64	70	89	39	14	13	6	16	29	52	40	100	27	8
AFUA_1G03310	562	319	279	0	3	0	0	0	0	396	294	164	6	1	0	0	1	0	9	32	18	0	1	1	0	0	4	71	83	83	0	0	2	0	0	0
AFUA_1G03320	146	158	220	7	14	10	19	2	8	80	121	151	9	5	8	8	12	5	72	91	48	8	10	16	12	5	7	103	90	88	9	6	12	11	4	13
AFUA_1G03352	0	0	4	41	70	95	10	2	3	0	0	0	73	71	76	0	4	5	0	0	0	38	42	114	1	4	6	0	0	0	143	55	280	0	3	9
AFUA_1G03360	395	238	196	58	88	37	122	57	24	211	127	89	24	26	29	72	59	27	64	60	55	28	44	47	73	81	58	70	93	102	66	37	52	112	104	40
AFUA_1G03370	527	344	385	816	899	555	1706	1255	1535	407	324	187	1047	871	597	1433	1319	999	321	221	269	1082	677	750	1922	1382	1290	276	302	217	623	1069	481	1235	1679	675
AFUA_1G03380	4211	3508	4496	2721	3685	2509	4306	3526	3365	3386	3188	2831	2733	3024	2948	3765	3158	2796	3127	2096	2974	3509	2573	3140	3902	2296	3562	3262	3276	3169	2212	2114	2209	2841	3261	3137
AFUA_1G03390	3316	3442	4193	10755	8014	12999	3179	3026	6251	2666	2312	2384	17344	14406	11673	3091	4944	6866	3428	2751	2661	16545	10809	17685	4044	3837	4154	1946	1684	1577	9744	17330	12375	4205	7616	2843
AFUA_1G03400	1314	937	1236	3015	3107	2955	2864	2427	2557	881	565	549	3316	3025	3348	2381	2379	2412	1034	669	965	3741	2449	3706	2161	2047	1930	739	811	919	2553	3383	3046	2083	2516	1655
AFUA_1G03410	734	526	702	877	1115	941	453	378	446	500	519	387	1239	1058	854	402	421	384	752	654	641	1359	750	1104	446	450	336	621	590	716	744	1062	726	421	550	205
AFUA_1G03420	614	405	444	811	913	1001	924	671	698	502	455	290	1455	1154	972	790	664	552	424	279	345	1675	992	1313	872	690	546	212	279	283	913	1492	884	1085	773	307
AFUA_1G03430	928	689	965	400	379	494	830	628	616	399	399	275	587	486	522	627	512	427	1114	937	1030	770	466	723	681	504	323	682	539	565	487	653	512	712	511	173
AFUA_1G03440	685	473	542	849	675	830	1091	1159	1501	290	201	206	697	641	754	1100	1330	1126	780	542	704	896	594	892	1812	3028	1786	372	282	294	730	893	715	867	2115	778
AFUA_1G03450	657	546	634	573	644	808	1012	814	1019	279	236	218	909	669	690	856	1009	836	519	395	548	1260	674	779	1137	1261	994	406	347	406	686	871	597	789	1202	438
AFUA_1G03460	2516	1702	2518	652	597	795	884	759	976	1031	792	584	1012	958	925	720	762	778	906	662	645	1267	826	984	769	458	905	1181	1491	1540	955	1263	900	874	1119	596
AFUA_1G03470	4	0	1	41	41	20	20	13	14	0	0	3	63	44	25	35	28	18	2	1	2	51	15	43	20	12	9	1	0	0	26	32	14	28	21	8
AFUA_1G03480	2	5	1	43	58	29	20	28	37	0	1	1	40	53	41	17	38	13	3	7	6	70	26	52	51	14	50	5	2	1	34	28	25	39	19	12
AFUA_1G03490	757	727	737	796	915	801	1609	1207	830	758	811	701	775	846	858	914	794	667	770	415	672	882	589	956	974	817	825	788	932	709	640	779	718	889	1058	619
AFUA_1G03500	4640	3820	5708	2582	3281	3131	3529	2405	3012	2524	2406	2434	2314	2629	3226	2155	2694	2178	4970	3346	4551	3423	2276	3751	2626	2802	2492	3896	3826	4073	2065	1958	2862	1544	2746	1734
AFUA_1G03510	3415	2476	3145	6246	6784	9666	5833	5148	8125	3471	2733	2127	9753	9357	9868	5359	6262	7779	2778	2437	2598	11081	7394	10987	5732	5469	5648	1385	1225	1441	7840	10000	9604	6021	8725	5123
AFUA_1G03520	69	28	69	71	94	53	36	61	49	28	29	42	116	140	49	46	55	31	115	68	98	160	73	83	70	56	78	64	42	99	45	54	48	18	59	6
AFUA_1G03530	1160	716	908	335	396	122	325	215	218	406	264	249	236	245	134	314	254	181	396	259	351	319	252	213	397	221	310	522	560	615	357	281	156	267	320	107
AFUA_1G03540	2731	1973	2883	922	1065	817	962	748	1047	1888	1733	1343	879	883	840	737	936	806	1509	1122	1542	882	514	1021	974	624	857	2158	2401	2312	397	662	682	462	887	351
AFUA_1G03550	391	266	318	467	496	990	880	794	575	317	232	175	1338	1060	817	931	749	474	351	249	291	1444	850	1062	607	454	630	182	164	246	1015	1305	874	764	689	446
AFUA_1G03560	893	614	920	948	792	575	874	771	791	601	520	417	927	795	495	719	742	597	1520	1137	1503	1235	826	765	1063	1114	712	683	567	517	1042	1182	592	600	868	477
AFUA_1G03570	384	214	278	37	75	35	107	93	64	232	143	101	123	112	38	129	70	57	128	84	120	103	64	47	70	55	77	143	180	157	66	96	45	84	86	36
AFUA_1G03580	2736	3147	2889	106	273	79	39	38	38	4873	4823	4647	129	88	70	41	62	33	1699	2369	1514	72	48	89	50	19	63	2411	3705	2496	61	167	84	73	58	10
AFUA_1G03590	860	533	701	757	647	782	1220	896	911	483	404	370	914	715	859	1074	995	627	928	463	789	1000	506	877	1249	694	607	478	532	524	641	826	658	824	923	259
AFUA_1G03600	253	209	247	359	579	337	204	116	109	264	179	147	472	537	357	101	116	73	162	171	137	687	503	239	93	108	175	189	232	219	588	602	333	167	123	106
AFUA_1G03610	52	41	31	16466	22692	26553	1955	868	2182	26	38	18	14046	15051	27000	343	2253	2014	4	12	4	17161	15087	23522	945	969	6050	25	20	28	38640	27304	35529	587	2043	4301
AFUA_1G03620	1171	692	1097	603	742	639	3044	2147	1227	766	718	597	1332	1113	616	1832	1140	813	677	542	586	1385	777	832	1585	1583	478	633	501	625	1080	1340	566	2035	942	369
AFUA_1G03630	43	17	45	3089	3019	3411	3684	3128	3778	27	14	14	8005	6524	3919	1937	2474	2400	19	10	20	7866	4349	4561	2948	2027	2121	9	11	26	5819	8289	4388	3883	2091	2411
AFUA_1G03640	2952	2285	2643	647	706	602	804	649	899	2162	1536	1156	863	719	664	867	944	539	1219	1358	950	601	339	854	1134	1323	466	1425	1666	1835	318	684	630	556	1160	280
AFUA_1G03650	118	153	189	1656	4454	1366	825	573	962	61	31	17	917	1123	1438	644	841	621	87	33	71	1432	1031	1712	1053	1132	1235	68	52	65	1294	1123	1487	511	834	730
AFUA_1G03660	560	388	406	2946	4151	2432	2259	1457	1888	388	338	212	2544	3629	2239	1320	1494	1475	278	210	230	3496	3978	3372	2306	2369	1651	231	252	285	2181	3458	2626	1933	1745	644
AFUA_1G03670	1	0	3	7	25	5	12	8	8	0	0	0	7	7	6	15	9	3	0	0	0	6	4	8	10	4	0	0	0	4	1	1	7	6	9	0
AFUA_1G03680	3475	3165	4703	1301	926	2036	1608	1312	1482	1865	2471	2741	2405	1975	2099	1533	1461	1405	3318	3002	3244	3069	1909	2328	1356	804	1245	4049	4147	3622	2706	2897	2256	1536	1624	1143
AFUA_1G03690	204	177	196	206	227	389	46	42	82	187	159	145	359	276	382	51	45	34	99	123	96	414	287	440	55	61	83	106	156	147	536	501	426	22	87	24
AFUA_1G03700	444	357	453	183	225	156	148	99	122	199	210	129	148	122	148	107	116	92	189	206	253	196	91	169	152	102	182	283	285	443	73	115	104	161	115	123
AFUA_1G03710	7628	4853	5283	863	1044	861	681	592	656	6825	6869	3925	886	903	962	618	638	563	2347	1409	2017	1392	1017	984	676	648	658	2208	2641	3178	920	941	1095	568	1070	368
AFUA_1G03720	2117	1616	1911	2630	3018	4692	3169	2519	2304	2276	2131	1828	3333	3283	4349	2868	2446	2258	1850	2208	1690	4377	3569	5730	2340	2269	1790	1384	1286	1507	4851	4352	4606	3553	2748	1953
AFUA_1G03730	686	472	507	1081	1781	733	3641	2453	1747	631	631	397	776	918	927	2103	1726	1287	242	170	227	1055	922	892	2459	2538	1381	251	274	363	1041	1143	880	2667	2063	577
AFUA_1G03740	1256	1141	1435	1009	1041	1629	2659	2091	2326	784	729	758	2225	1702	1905	2244	2093	2078	1652	1204	1417	3213	1942	2312	2276	1371	1825	948	993	765	1975	2222	1666	2267	2247	1509
AFUA_1G03750	160	119	153	530	443	567	603	438	426	59	61	74	826	716	587	495	421	404	160	128	149	904	542	840	542	378	439	93	101	94	473	660	461	510	541	189
AFUA_1G03760	1251	1026	1836	1308	1338	1449	3064	1987	1602	623	595	894	1790	1546	1590	1910	1830	1301	2020	988	2042	2616	1490	1662	2334	1497	857	2129	1881	1869	1348	1604	1275	1608	1393	541
AFUA_1G03770	86	79	101	132	135	115	83	104	77	61	79	56	223	188	142	70	72	66	72	44	57	258	126	144	102	51	65	47	52	85	108	198	116	113	108	40
AFUA_1G03780	114	87	83	123	122	118	67	52	75	83	58	50	133	131	115	66	70	85	74	85	62	201	97	123	79	60	73	61	65	52	71	109	74	61	72	33
AFUA_1G03790	4037	3174	4033	1294	2432	1088	389	503	824	2992	2744	2104	875	930	1169	420	859	698	2121	1373	1917	1057	778	1602	550	304	1848	2727	3502	3519	544	739	786	380	1061	656
AFUA_1G03800	3799	2303	3682	1000	1310	1400	981	596	914	1945	1817	1359	856	1022	1403	549	906	701	4077	1885	3294	1052	796	1305	920	696	1066	4509	3389	4610	774	594	921	504	1028	431
AFUA_1G03810	1844	1293	1676	752	863	989	1016	709	736	1181	1189	1082	1259	1138	994	747	654	677	1393	1284	1132	1433	838	1344	647	502	693	1017	1179	1383	981	1401	834	914	895	556
AFUA_1G03820	1172	969	1564	661	652	561	1075	904	1436	468	379	351	638	615	613	1050	1303	966	1507	902	1345	670	347	673	1482	1052	903	816	602	1122	344	555	397	506	1042	471
AFUA_1G03830	1976	1597	2485	721	699	1009	843	704	718	1163	1157	1100	1086	944	762	723	701	517	1772	1648	1684	1166	795	1079	718	578	398	1697	1495	1521	828	1121	842	587	675	312
AFUA_1G03840	644	536	713	2190	2921	2492	2363	1986	2050	555	548	440	2482	2627	2426	1764	1970	1747	652	449	559	3080	1951	2838	1839	1557	1656	435	498	420	1778	2256	2049	1597	2164	919
AFUA_1G03860	736	637	911	164	134	266	571	360	389	385	333	223	309	208	248	435	439	307	915	531	911	471	304	274	533	297	230	476	446	592	307	352	211	396	384	106
AFUA_1G03870	182	196	320	116	170	237	247	221	159	159	175	101	280	260	311	213	177	142	315	295	274	359	228	296	148	110	60	279	310	172	278	313	250	220	229	118
AFUA_1G03880	629	619	789	595	694	512	940	750	752	448	532	506	800	657	505	746	535	578	940	795	887	840	636	558	704	591	669	872	868	681	1157	1385	553	932	793	781
AFUA_1G03890	910	649	849	2879	2959	2459	3732	3616	6582	525	516	355	2375	2612	2301	4649	6874	5009	682	536	482	3010	1741	2769	4172	2410	6698	542	579	643	1841	2467	2158	1860	5385	4586
AFUA_1G03910	107	96	150	635	685	727	1161	1179	1393	17	39	38	1133	983	806	1375	1486	1178	230	167	178	994	779	990	1209	640	768	153	105	91	751	1015	782	987	1311	902
AFUA_1G03920	1709	884	1271	1614	2449	1563	1111	1041	1269	814	472	340	2122	1917	1811	1147	1169	890	636	292	663	2418	1248	1932	1098	945	811	1053	1073	1518	1102	1778	1646	882	1283	546
AFUA_1G03930	791	668	867	1204	1192	1042	879	707	1405	574	481	415	823	904	1159	918	1227	1179	871	532	839	1104	615	1248	1493	1046	1083	752	779	721	551	731	894	401	1399	508
AFUA_1G03940	1902	1386	1915	2660	2645	2177	1751	1390	2440	796	699	639	2501	2408	2286	1837	1986	1956	1205	1021	1258	3333	2181	2722	1981	1328	2000	1167	1115	1379	2127	2712	2282	1218	2131	1158
AFUA_1G03950	400	265	342	5707	7424	4130	2921	2431	4921	206	159	141	5647	5853	4317	2877	4183	4317	284	148	241	3797	2499	4554	3162	4128	5474	216	242	227	2069	2778	3344	1151	4493	2852
AFUA_1G03960	4419	2972	4045	1112	1488	911	1045	886	1297	3025	3434	2759	1179	1172	1035	949	1246	1162	3399	4155	3028	1507	1125	1257	1000	699	1458	3150	3295	3739	1535	1805	1189	1073	1494	1186
AFUA_1G03970	4316	3852	5796	3928	3779	4811	3421	2714	3856	3059	3483	4846	4409	3763	4603	2855	3650	3304	4946	2913	4303	6720	3617	5099	4125	2950	3355	4804	4212	4320	2712	3320	4276	1868	3568	1964
AFUA_1G03992	811	558	592	1641	1333	995	828	807	1081	437	338	241	973	952	1043	872	1122	945	342	241	404	1105	677	1019	714	525	1005	381	457	474	964	1060	819	450	819	726
AFUA_1G04010	1130	728	809	584	452	584	555	388	346	794	683	587	590	514	532	375	396	306	450	470	445	629	301	563	358	327	293	437	553	403	410	595	468	404	443	166
AFUA_1G04020	1999	1312	1773	1379	1848	1443	1723	1434	1531	1171	976	819	1553	1524	1433	1400	1528	1346	1460	1543	1427	1805	1246	1890	1480	1090	1277	1461	1200	1255	1322	1841	1381	1309	1629	967
AFUA_1G04040	7470	7040	9000	13065	13664	20746	5798	5407	8133	6917	5332	5747	24972	21385	17843	5513	7054	8262	8005	7050	6662	27346	15754	25600	5851	6497	4575	4735	4432	3776	12826	22935	19425	7168	10660	3869
AFUA_1G04062	885	612	707	1539	1852	856	1319	1220	1374	413	337	219	1457	1321	880	1277	1384	942	419	370	317	1509	916	991	1460	1141	1216	379	360	379	1106	1541	742	1156	1450	412
AFUA_1G04070	6378	7163	8654	13258	13522	24966	16925	17234	20655	4361	3865	4026	30832	24518	22992	19503	20764	18511	7972	7810	6566	35515	17363	29209	18481	20787	11315	4598	4443	3751	18170	29685	23733	17352	24815	11337
AFUA_1G04080	1403	1175	1102	1132	1042	1601	1518	1099	1013	1443	1117	865	1604	1278	1596	1020	1062	891	979	988	914	2394	1258	1855	1107	875	653	1009	993	1036	1353	1665	1448	1121	967	381
AFUA_1G04090	219	104	207	233	284	334	224	182	222	50	55	40	241	251	307	186	249	186	110	128	100	265	140	382	169	106	259	124	165	198	184	281	273	156	229	105
AFUA_1G04100	27975	44020	59760	135	139	141	334	292	340	18674	26427	63704	233	190	138	334	264	223	118477	140060	106787	300	177	167	264	204	170	75319	54797	21473	288	412	127	326	273	96
AFUA_1G04110	1301	897	1178	201	246	302	678	466	343	672	613	514	312	238	330	388	326	302	652	196	669	480	216	219	465	347	259	725	874	1073	245	239	222	325	392	154
AFUA_1G04120	449	289	448	701	798	388	991	752	1834	240	179	112	766	1043	460	762	975	2333	170	174	154	738	676	536	1157	907	2118	164	208	231	667	875	459	1546	2534	1616
AFUA_1G04130	56	56	48	1500	1033	650	9112	6812	4615	74	71	105	2906	2335	888	8504	5287	3663	50	55	42	2184	1290	917	8872	2070	2610	65	68	122	1407	2208	366	11027	2751	2080
AFUA_1G04140	247	169	134	562	676	286	546	504	629	298	296	177	423	368	194	457	439	239	46	15	51	370	231	290	1133	293	503	78	116	134	238	353	195	548	761	156
AFUA_1G04150	311	211	207	5169	4206	3369	685	1276	5376	323	260	205	7821	5810	1377	1128	2448	1695	113	72	134	11007	4951	3762	5947	911	5295	150	191	180	3918	9218	2034	314	4438	1783
AFUA_1G04160	2644	1934	2296	1415	1312	362	10423	7165	6674	2416	2661	2150	550	573	239	6912	5988	5855	1230	1380	1377	637	375	315	7933	9160	2865	2554	2685	2141	867	1210	158	6356	10182	1326
AFUA_1G04170	131	75	109	235	234	198	355	265	231	34	48	48	112	123	174	198	145	135	85	50	88	196	95	209	281	238	162	86	91	134	128	152	176	185	213	180
AFUA_1G04190	1746	2016	2997	5450	8585	3980	4095	3528	8312	991	1257	1153	5626	4704	4807	4527	6586	7004	1722	1151	1551	6562	3371	5871	7716	7458	6741	1285	1222	1456	2114	4227	4022	2202	7637	4130
AFUA_1G04210	2029	1863	2531	1189	1598	1534	1740	1860	2734	1437	1219	1223	1269	1151	1590	1720	2482	2302	963	626	877	1897	1067	1776	2554	1518	2794	1390	1655	1491	1069	1273	1154	1232	2459	1434
AFUA_1G04220	458	416	395	358	281	222	131	189	300	324	284	172	251	275	240	192	205	214	310	303	226	244	144	293	225	137	303	175	171	184	146	217	169	144	225	121
AFUA_1G04230	1824	1482	1699	1114	1330	767	499	464	970	1244	1104	838	778	851	761	606	879	669	1369	1019	1219	796	450	1006	790	639	674	950	955	895	444	551	632	300	968	379
AFUA_1G04240	1016	1106	1523	916	1100	970	2108	1652	2582	450	399	409	877	881	1082	2063	2534	1879	1290	765	1088	1209	658	1297	3170	3262	1533	758	557	568	489	719	816	1265	2341	660
AFUA_1G04250	155	87	90	187	282	201	301	200	179	89	32	22	185	226	202	183	162	139	51	7	36	298	219	277	215	242	135	47	57	62	236	196	207	156	153	100
AFUA_1G04260	1107	766	817	2241	2740	1286	29356	19934	10457	774	626	446	2414	2342	1346	22618	13284	7890	408	240	346	2856	1470	1251	17861	14282	2277	427	587	627	2316	2574	1038	13892	8642	1287
AFUA_1G04270	2774	2368	2661	9097	9909	5154	3310	3853	6531	3231	2966	2481	2056	2796	6306	4136	5819	5691	1709	1304	1882	2737	2075	5966	4432	3099	10123	1983	2378	1707	1922	2421	3185	2618	6786	5899
AFUA_1G04280	2860	2481	3295	2210	1944	1735	1751	1539	2221	1264	1479	1499	1576	1893	1815	1593	1794	1709	3513	3226	3289	2237	1594	2557	1734	1353	2357	2488	2186	1827	1710	2108	1844	1346	2553	1604
AFUA_1G04290	1957	1189	1683	3438	4700	3162	3867	3264	3724	872	650	484	3275	3002	3377	3380	3851	3160	1127	560	884	3947	2493	4100	3421	2619	3352	984	1011	1397	2530	3267	3051	2646	3968	1745
AFUA_1G04300	118	90	114	1847	2282	1006	284	1134	5651	106	59	80	3052	2809	1128	1094	5304	8144	159	138	254	3260	1978	1248	2177	405	8016	102	105	273	2327	5142	743	1282	6625	4810
AFUA_1G04310	1596	1121	1084	811	1133	433	416	793	2288	1116	851	608	895	943	462	753	2169	3025	661	539	636	942	544	714	1059	648	3596	641	705	1067	720	1639	444	675	3003	2092
AFUA_1G04315	1248	1105	741	600	847	928	416	360	463	1638	1396	877	754	745	991	445	418	431	365	270	265	897	815	1025	413	483	498	231	266	506	1586	1309	1311	458	688	497
AFUA_1G04320	7193	5564	6782	13336	9772	18027	5080	5195	8648	6750	4799	4420	22762	20631	19196	5035	6822	8941	6049	6323	4924	26585	16251	24336	5795	5239	5612	3622	3668	3520	13275	22029	20410	6899	10945	4880
AFUA_1G04330	174	106	155	220	326	373	416	495	285	94	103	97	373	268	315	562	441	315	380	380	349	627	374	488	445	254	260	156	155	221	348	541	312	592	381	143
AFUA_1G04340	90	45	84	597	949	797	1012	801	958	18	17	19	762	627	738	940	1107	634	78	29	54	1130	637	862	1456	765	647	45	42	67	547	696	762	1110	853	424
AFUA_1G04350	63	44	58	366	285	231	394	310	404	31	22	18	460	418	284	409	365	306	32	16	30	467	300	309	320	196	399	35	33	50	389	550	267	456	374	357
AFUA_1G04360	1524	1250	1592	979	1249	1572	1597	1258	1483	926	979	954	1549	1357	1672	1158	1210	1153	1274	762	1230	2136	1176	1785	1282	778	1280	1048	1140	1334	996	1246	1224	1053	1248	801
AFUA_1G04370	156	232	274	787	773	755	449	475	1066	100	83	55	1024	1041	1049	536	831	1008	161	86	119	961	484	1279	1020	1111	691	60	69	89	241	596	931	308	1175	365
AFUA_1G04380	3962	2876	3558	1099	1510	752	730	652	1048	2808	2664	1699	766	961	794	686	963	668	1381	1408	1453	943	532	996	1066	735	1158	2468	3254	3437	687	918	548	615	1281	486
AFUA_1G04390	451	258	348	244	310	553	631	619	369	164	127	129	813	581	414	726	482	287	324	229	271	745	458	529	427	206	253	213	215	229	558	805	398	534	374	204
AFUA_1G04400	487	525	758	1128	1321	1277	723	695	1236	257	191	165	1300	1337	1101	715	1055	923	1059	936	733	1517	920	1644	1033	734	1063	518	334	325	773	1160	1229	701	1040	626
AFUA_1G04410	1136	935	1300	451	545	625	815	568	837	851	952	814	582	444	618	571	724	588	1369	777	1264	888	465	642	974	494	670	861	797	919	482	470	572	440	738	464
AFUA_1G04420	559	472	491	204	134	153	396	278	249	451	528	374	215	207	222	263	206	207	526	611	516	255	120	225	229	299	249	287	301	356	162	219	138	247	289	121
AFUA_1G04430	104	136	132	903	957	1157	4784	3246	2863	122	114	112	1962	1712	1517	2437	2229	2223	106	47	89	1929	1062	1991	3011	3638	2865	87	81	114	961	1447	728	3964	2547	1608
AFUA_1G04440	784	699	963	1290	1528	1048	2579	2350	3217	766	802	982	1296	1454	1054	2065	2673	3231	1111	1135	1246	1402	947	1190	2898	3282	4664	1087	1075	699	1062	1359	932	2130	5051	3910
AFUA_1G04450	2452	2259	3335	1446	2140	1858	888	1012	1354	1655	2350	2607	1782	1878	2216	921	1144	1184	3110	2679	3081	2409	1569	2080	916	427	1804	3395	3841	2623	2227	2215	2264	712	1521	1270
AFUA_1G04455	120	91	133	22	37	19	57	23	27	53	43	65	29	19	30	29	18	26	58	38	55	40	46	37	50	27	34	67	123	125	28	32	23	32	25	9
AFUA_1G04460	369	265	403	491	486	346	265	200	267	223	178	153	397	501	397	180	246	262	377	226	275	454	215	430	188	268	203	175	135	222	234	297	411	214	487	118
AFUA_1G04470	749	705	908	1051	1038	1496	912	890	1358	405	315	312	1588	1412	1407	940	1174	1195	1914	1213	1491	1987	1260	1815	1127	895	918	742	624	490	1132	1522	1513	818	1344	661
AFUA_1G04480	1384	1270	1871	1039	1469	1238	919	1066	1255	988	1119	1084	1135	1015	1335	919	1294	1214	2006	1791	1599	1316	829	1504	1189	571	1347	1846	1922	1660	665	1033	832	656	1351	656
AFUA_1G04490	6948	4780	6234	892	1605	1528	1868	1432	1128	4279	3653	2712	1393	1319	1391	1448	1152	1032	5629	4559	5014	2046	1373	1724	1195	941	1307	3888	4043	4990	1753	1914	1413	1672	1239	687
AFUA_1G04510	7012	4097	5827	283	407	203	359	220	319	4373	3928	2122	324	360	299	235	233	245	8761	5210	7233	456	300	380	387	329	334	5227	4270	5036	265	392	248	531	432	117
AFUA_1G04520	1287	1080	1444	839	857	910	955	782	681	654	753	533	831	669	797	813	757	637	1415	850	1083	1073	619	958	703	514	578	872	826	1098	519	737	678	555	724	329
AFUA_1G04530	2506	2757	3313	10319	9058	12772	3907	3772	6202	2173	1868	1848	17335	15317	13408	3532	4937	6911	3782	3104	2811	20217	11121	17486	4166	3719	3704	1708	1524	1109	9362	16338	15411	4629	7758	3087
AFUA_1G04540	695	425	676	2895	2912	2752	1543	1340	2761	229	107	96	3254	3521	3037	1569	2260	2941	272	272	277	4275	2617	3576	1856	1602	3097	364	327	520	2608	3785	2878	1435	3426	2112
AFUA_1G04550	726	509	729	4115	5432	2879	2137	1963	2291	290	335	334	4631	4575	2676	1951	2050	2203	456	536	400	5100	3626	3539	1657	1661	2225	451	413	512	4148	5303	3189	2347	3027	1551
AFUA_1G04560	1217	766	1049	1495	2004	3128	2431	2099	1694	520	541	370	4720	3877	3546	2232	1670	1316	823	588	856	4265	2362	3505	1659	1082	809	704	683	920	2401	3045	2829	1730	1715	629
AFUA_1G04570	601	338	454	343	424	310	445	285	403	161	109	111	385	443	378	326	337	226	152	87	128	404	277	495	431	278	222	252	250	282	302	415	338	297	314	89
AFUA_1G04575	300	253	314	1900	2453	3310	2971	2447	1914	166	160	111	2358	2587	3069	2298	1878	1817	253	140	228	1731	1265	4885	3062	1454	2352	174	198	206	1860	1760	3707	2476	2460	843
AFUA_1G04580	465	264	333	423	481	455	409	299	353	246	236	153	665	519	460	226	251	288	204	144	190	649	395	474	343	150	294	205	181	213	482	567	434	273	296	228
AFUA_1G04590	1572	967	1499	1010	1122	878	1786	1516	2091	705	787	539	1044	962	1063	1666	1787	1672	1747	1114	1813	952	670	910	1926	756	1471	1340	1125	1510	857	997	792	763	1750	991
AFUA_1G04600	1109	935	1144	1161	1337	832	1045	915	1409	864	757	487	1337	1259	1115	978	1139	1137	419	306	379	1555	893	1240	1204	1049	1335	577	731	828	763	1232	963	792	1662	534
AFUA_1G04610	2464	1806	2637	562	552	701	763	455	652	1334	1042	1147	732	766	667	588	617	540	1811	1821	1492	1139	791	915	746	552	489	2162	2071	2551	853	1095	708	521	561	357
AFUA_1G04620	2164	1573	1940	26398	29754	25783	26758	20674	35922	1598	1527	1000	26313	28626	29518	17569	24903	35078	1090	893	1008	42606	39218	41039	24927	46436	32483	1197	1360	1353	36042	35064	29419	27163	40125	17757
AFUA_1G04630	451	444	448	120	245	214	94	116	150	543	577	676	254	221	189	142	142	141	282	256	261	361	245	246	122	71	104	383	441	354	469	601	331	91	169	49
AFUA_1G04640	1823	1437	1857	4283	4822	1841	2289	2741	4216	1148	1227	1067	1808	1983	2232	2793	3362	3440	1189	895	1136	2376	1736	2087	3695	3097	3850	1457	1597	1650	1749	2022	1396	1564	3892	2755
AFUA_1G04660	6203	5175	5871	17312	17087	18303	5005	4626	8159	5537	4474	4038	23694	21787	15687	4329	6429	7992	6077	5315	4925	25735	16274	23253	5104	5633	6431	3083	2740	2770	13468	21600	19276	5790	10278	4537
AFUA_1G04670	12234	7965	11852	2368	2461	1999	3118	2635	2295	9959	9405	8270	2350	2178	2098	2385	2221	1804	9179	4206	9025	2716	1771	2065	2631	1837	1977	10675	10973	10780	2136	1982	1856	1889	1962	1147
AFUA_1G04680	13798	10172	12639	3412	4804	3331	1970	2517	4594	14745	13121	11336	3717	4390	3722	2391	4673	4222	7149	8662	7265	5185	3876	4282	3582	2693	6283	11254	12759	11640	4554	6642	3504	3111	5964	2787
AFUA_1G04690	630	491	600	551	806	789	869	625	549	479	490	543	1095	849	716	641	596	529	971	1072	906	1109	550	955	715	567	283	667	607	543	534	804	702	756	602	319
AFUA_1G04700	2413	1608	2147	2996	4514	2021	2327	1594	1764	1372	858	628	1935	2019	2095	1549	1294	1347	698	398	671	1874	1455	2284	1374	1244	2522	920	1043	1260	1728	1617	2060	1563	1930	1526
AFUA_1G04710	530	439	654	404	394	546	704	707	1072	382	330	329	680	557	539	802	968	865	951	671	786	564	360	623	1159	728	678	542	376	468	329	640	416	413	1007	449
AFUA_1G04720	910	619	664	6305	6471	2673	2306	2392	4178	596	599	374	1631	2366	2994	2926	3568	3218	634	537	746	1164	533	3143	2834	4640	3496	291	336	474	591	1076	1905	945	6111	1969
AFUA_1G04730	312	160	195	1363	1302	304	323	356	524	158	160	110	295	416	404	493	561	252	156	154	180	307	207	353	550	638	319	177	165	202	247	390	201	157	968	91
AFUA_1G04740	51	42	53	46	46	41	52	26	34	43	35	37	12	35	37	38	21	22	48	5	42	45	22	25	33	30	32	49	39	41	44	32	33	38	24	15
AFUA_1G04750	366	220	381	3522	3786	2089	7278	4572	4163	224	203	179	3052	4044	2423	4700	3440	3222	263	151	239	2772	2395	1903	4340	4075	2939	298	347	260	4188	3341	1615	2991	2705	1914
AFUA_1G04760	1118	619	803	1401	1409	800	1209	1214	1552	956	711	531	950	942	731	1590	1331	1136	778	690	737	954	650	765	1526	955	1150	521	421	622	897	1044	672	1407	1392	648
AFUA_1G04770	403	343	502	467	489	530	846	629	506	199	140	131	628	494	467	682	518	313	270	196	249	644	386	595	668	597	433	268	265	297	444	605	417	566	504	187
AFUA_1G04780	539	454	778	2200	1975	1577	4280	4001	3518	259	283	293	2005	1836	1442	3797	3282	2346	1287	1022	1074	3786	2762	1835	5124	6061	2955	1054	839	674	3108	3290	1238	3024	4518	2503
AFUA_1G04790	1894	1350	2072	1357	1365	984	2516	1589	1154	920	861	891	1289	1231	1029	1443	947	947	1907	554	1748	1357	701	971	1625	1062	889	1645	1517	1502	842	794	842	811	865	534
AFUA_1G04800	4414	3511	4582	1076	1015	904	1240	862	986	3622	2808	2353	1051	1015	950	925	865	760	3331	2786	2940	1363	925	1058	988	825	887	2901	3113	3271	1015	1119	788	797	1124	555
AFUA_1G04810	335	307	428	623	661	621	773	692	870	148	166	170	554	651	457	665	778	845	929	639	752	644	554	800	808	598	864	332	240	318	430	592	575	523	951	508
AFUA_1G04820	2887	1888	2793	1084	973	1440	1440	1220	1430	1962	1833	1505	1330	1263	1353	1331	1336	969	1436	1321	1431	1202	890	1641	1195	1222	837	1884	1752	2086	867	1171	1165	1107	1451	779
AFUA_1G04830	760	596	687	1064	1399	590	437	299	222	565	475	356	2007	1716	408	322	236	201	446	207	402	1956	904	387	288	224	315	541	520	572	956	1297	317	211	314	149
AFUA_1G04840	1163	1046	1440	2095	2088	1552	1075	1061	2711	617	500	449	1796	1720	1659	1166	2236	2263	819	500	811	2389	1271	2176	2472	2755	1977	771	769	844	790	1453	1420	738	2846	1040
AFUA_1G04850	3330	2317	3130	1311	1554	2575	1991	1773	1947	2463	1898	1697	2247	1979	2431	1874	2059	1903	2364	2366	2059	2892	1669	3218	1861	1543	1169	1909	2265	2226	1470	2130	2211	1716	2376	856
AFUA_1G04860	2223	1582	2003	3876	2753	1806	3383	3005	3768	1326	872	736	770	1074	1615	3073	4079	2769	937	694	814	775	591	1545	1768	2674	2575	901	1020	1250	814	894	1373	1358	3595	1420
AFUA_1G04870	85	71	64	583	792	1177	59	26	20	33	16	12	3318	2575	1043	31	52	22	59	31	50	1162	625	1296	14	30	19	57	62	66	593	903	1013	17	48	26
AFUA_1G04873	0	0	0	0	0	0	0	0	0	0	0	0	0	0	0	0	0	0	0	0	0	0	0	0	0	0	0	0	0	0	0	0	0	0	0	0
AFUA_1G04876	0	0	0	1	0	0	0	0	0	0	0	0	1	0	0	0	0	0	0	0	0	0	0	0	1	2	0	0	0	0	0	0	0	0	6	0
AFUA_1G04880	208	179	194	2670	2405	1958	3752	3132	3185	172	98	102	2171	2141	2164	2963	2828	2188	261	158	205	2178	1529	2311	3323	2375	2100	191	147	96	1523	1882	1640	2114	2633	1268
AFUA_1G04890	559	389	473	1681	1821	2511	1107	968	1246	496	328	350	2575	2324	2257	1000	1127	1271	595	334	561	2122	1473	2488	1017	684	847	318	311	285	1790	2236	2333	627	1246	828
AFUA_1G04895	5	1	4	2	4	0	0	0	3	0	2	1	0	0	0	1	1	1	4	0	1	6	3	1	0	0	0	0	0	3	0	1	0	0	0	0
AFUA_1G04900	2159	1351	1776	2223	3027	3528	1552	1466	1683	1495	1206	647	3978	3504	3589	1459	1540	1490	823	744	694	4511	2680	4395	1125	1329	1083	785	849	1093	2357	3739	3210	1739	2099	1266
AFUA_1G04910	1099	675	959	1476	1790	1181	2111	1633	1639	448	349	244	1177	1298	1063	1865	1739	1012	772	307	642	1038	626	1003	1827	1161	1514	547	502	728	858	796	799	696	1415	641
AFUA_1G04920	301	325	319	1315	1517	833	921	1081	926	271	314	244	743	803	854	987	977	745	83	51	82	1149	716	969	917	577	975	139	214	246	620	848	628	680	1669	522
AFUA_1G04930	2486	4495	5971	5268	5479	5059	7105	6473	8259	2311	3070	4520	3595	4314	5976	7618	8006	7630	3172	1831	2942	4061	2432	5806	9218	3942	8005	3730	4355	2644	2201	2735	4149	2511	7446	4438
AFUA_1G04940	19030	14258	16217	2801	2737	3625	3404	3054	2900	23426	21357	14976	4034	3851	4441	3243	2955	2585	8631	8388	7935	3981	2831	4963	2532	2587	2093	10179	12071	11894	4033	4616	4104	3383	3645	1476
AFUA_1G04950	5787	3912	4898	3460	5871	2760	3183	2688	3504	4887	3658	2681	3594	3165	3180	3041	3330	2870	3238	1610	2787	3548	1995	3189	3349	3010	2909	2457	2688	2813	2039	2907	2590	1922	3899	2037
AFUA_1G04960	193	141	188	1371	2622	1428	4371	2741	1489	104	93	76	1168	1122	1541	2268	1361	1144	91	55	65	1647	882	1504	2395	2315	1370	114	141	135	1348	869	1466	1974	1420	961
AFUA_1G04970	6502	5159	6743	2496	3333	3365	1797	2550	3707	5822	6560	5675	1868	2273	3213	1940	3449	3488	3166	2696	3188	2669	1962	3386	2238	1356	5588	5417	6561	6365	2460	2936	2772	1265	3932	3727
AFUA_1G04980	1148	872	1302	493	462	602	669	524	604	531	457	407	600	501	598	553	434	519	678	492	594	721	390	643	585	497	511	729	855	784	379	529	471	485	550	215
AFUA_1G04990	2124	2039	2820	2006	2089	2447	3392	2639	3252	1268	1548	1501	2913	2581	2660	2804	2990	2654	3860	2880	3250	3462	1735	2954	3996	2785	2422	2236	2013	1440	1649	2529	2290	2423	3426	1217
AFUA_1G05000	1117	721	907	1051	1323	1059	1048	911	966	840	780	630	1247	1327	1106	1031	950	920	828	708	719	1314	804	1505	870	818	1241	634	644	714	1094	1634	1127	1181	1279	862
AFUA_1G05010	529	363	500	594	566	173	363	389	421	504	478	417	222	229	201	406	429	328	608	378	436	188	202	225	273	292	457	273	292	404	199	295	146	207	409	262
AFUA_1G05020	434	460	559	782	676	966	100	85	169	285	273	238	2325	1633	868	68	109	99	184	229	171	1291	657	835	107	75	155	244	339	312	913	1504	939	49	112	110
AFUA_1G05040	1984	2485	3380	5863	7951	6591	8535	6073	9061	939	1151	1195	3597	5260	7751	4973	6899	8698	4732	2918	4162	6463	6589	9432	5570	13510	12552	2636	2100	2095	4833	4246	7679	6286	14146	12607
AFUA_1G05050	751	595	718	473	365	484	394	341	327	530	586	443	501	419	529	364	358	339	913	1121	815	490	447	529	212	370	289	482	553	580	434	496	408	420	655	310
AFUA_1G05060	2255	1625	2289	1824	1629	1924	1741	1632	2495	977	783	561	2158	2179	1899	1758	2191	1966	1052	721	852	2292	1512	2130	1843	1547	2210	1297	1155	1524	2082	2234	2036	1431	2402	1405
AFUA_1G05070	189	153	141	1078	1228	814	354	269	384	84	72	47	769	760	897	259	332	390	159	79	133	887	450	1057	275	333	340	103	70	130	376	748	617	245	470	207
AFUA_1G05080	1322	1594	1697	8467	6479	10250	2630	2696	5686	883	724	678	17506	13756	12255	2693	4206	6733	1213	958	966	16238	8872	15637	3750	2903	3248	718	663	654	7305	14193	13204	3016	7112	2522
AFUA_1G05100	338	224	310	612	642	976	1102	825	804	190	149	135	966	695	943	876	796	725	278	159	234	1317	721	1178	804	519	640	230	174	244	646	880	926	830	852	490
AFUA_1G05110	7728	6603	7886	1458	1787	1219	2138	1753	2307	8469	8622	6569	1053	1220	1407	1848	1939	1953	4206	2630	3626	1405	838	1704	2058	2024	2100	5075	6311	6310	744	1008	1234	1265	2352	1255
AFUA_1G05115	0	0	0	1	0	0	0	0	0	0	0	0	0	1	0	0	0	1	0	0	0	0	0	0	0	0	0	1	0	0	0	0	0	0	0	0
AFUA_1G05120	331	158	266	665	751	1011	932	728	819	66	69	37	1356	1209	1153	840	684	832	316	218	350	1424	757	1346	726	508	469	205	165	293	830	1239	1023	570	818	553
AFUA_1G05130	3946	3596	4313	22019	32374	9947	8621	11870	20366	3850	3847	3048	8693	10479	12541	13254	17989	15461	2640	980	2396	12397	9441	9561	17754	12367	20654	3067	3685	3551	8765	10049	6868	3714	19270	10792
AFUA_1G05140	190	139	128	261	301	184	230	220	230	174	148	101	116	117	194	274	270	85	57	24	59	209	129	184	476	296	257	61	96	103	78	108	106	205	331	93
AFUA_1G05150	285	314	541	381	358	447	335	287	699	64	31	39	699	583	586	380	519	727	274	182	219	878	375	781	584	341	542	160	161	175	263	518	501	264	721	322
AFUA_1G05160	2588	2258	3101	1393	1853	1536	1193	1175	1781	1444	1145	989	1205	1231	1514	1379	1755	1071	1611	1528	1414	1199	643	2016	1888	2015	1455	1407	1458	1421	530	983	1257	904	2180	525
AFUA_1G05170	298	242	295	1276	1371	492	529	527	1146	101	51	37	553	767	589	705	938	846	175	108	161	495	384	526	1005	838	1477	124	150	268	394	462	374	252	1194	580
AFUA_1G05180	347	282	411	467	516	402	365	255	386	105	82	88	417	405	373	309	332	282	445	304	415	427	209	519	278	161	406	238	225	216	227	400	370	246	341	259
AFUA_1G05190	867	763	1148	1914	1742	1764	2973	2771	2746	314	401	410	2184	2193	1951	2876	2672	2269	1921	1651	1561	2823	2088	2393	2598	1666	1962	997	794	966	2085	2658	1809	2636	2613	1264
AFUA_1G05200	2194	1937	3152	6736	5620	5563	4480	3874	7710	1375	1621	1505	6907	6174	6294	4334	5663	6609	4092	2487	3640	8976	5448	6822	6217	4504	5962	1978	1469	2104	4101	5579	5667	2546	7304	3713
AFUA_1G05210	1355	1167	1488	830	1054	1089	884	710	821	604	629	709	1286	1244	1078	620	867	765	1837	1000	1449	1573	871	1378	827	593	787	1001	996	805	952	1172	1033	582	852	483
AFUA_1G05220	6211	4719	4768	734	1127	843	715	666	826	5543	4527	3336	1098	1043	704	816	851	476	1764	2065	1573	1380	897	1117	986	450	830	2663	3574	3669	1189	1603	950	835	982	515
AFUA_1G05230	5136	5410	7362	2735	3441	1142	996	1387	3719	3241	3733	3152	1378	1356	1135	1741	3567	2378	2653	1863	2650	1521	969	1070	3465	2678	2726	5412	7919	7227	778	1147	864	444	2627	1283
AFUA_1G05240	2828	2369	3767	2478	2911	3107	3596	3121	4221	1760	1873	1414	2860	2905	3521	3165	3647	3106	1776	856	1790	4046	2696	4029	4115	3177	4659	3226	3336	3741	2492	2402	3054	2514	3724	2290
AFUA_1G05260	639	491	605	874	1300	817	1586	1056	967	437	336	276	739	749	791	970	988	670	332	220	262	1054	636	906	956	1189	974	285	367	408	747	724	742	900	1139	589
AFUA_1G05270	261	171	180	350	411	191	5165	3700	1941	199	163	97	357	433	239	4829	2278	1608	126	133	104	430	224	316	3264	2595	251	91	144	168	440	483	209	3081	1549	122
AFUA_1G05280	198	126	175	787	804	1291	850	767	1033	108	97	96	1170	977	1128	786	924	842	229	132	196	1924	1105	1544	905	429	726	143	178	148	1020	1224	994	881	792	676
AFUA_1G05290	47	35	41	519	782	330	1854	1602	1737	27	19	12	472	548	441	1488	1297	1591	23	17	38	711	479	507	2848	1430	1074	26	46	66	734	1187	627	2492	1825	444
AFUA_1G05300	603	484	532	552	711	350	607	501	676	384	279	202	560	486	386	614	622	428	615	419	613	640	337	486	880	604	419	551	591	706	298	437	282	326	621	139
AFUA_1G05310	406	496	857	980	1207	996	807	690	2348	114	71	84	1138	1070	1092	1025	1633	1559	435	212	418	1273	725	1342	2244	2023	1319	292	184	296	436	868	1076	458	1900	820
AFUA_1G05320	303	146	155	264	385	1006	1061	800	478	117	112	69	497	494	935	804	611	573	235	181	159	938	528	1189	550	706	456	74	64	87	549	544	921	1134	866	585
AFUA_1G05330	88	45	73	113	139	305	191	160	141	57	31	45	309	189	277	219	137	139	122	89	123	474	214	412	226	122	91	55	58	38	172	311	218	178	202	72
AFUA_1G05340	2382	2692	2936	7723	10306	9425	2833	3006	4419	1972	1517	1509	12021	9763	9540	2749	3692	5078	2746	2294	1987	11905	5992	13155	3103	2946	4112	1085	1168	929	4814	10604	9881	3941	5873	3416
AFUA_1G05350	698	597	592	126	152	179	312	289	338	702	646	583	247	202	145	364	252	269	637	613	509	197	132	192	229	180	288	674	732	771	191	263	205	415	483	259
AFUA_1G05360	1399	1025	1380	132	142	175	352	260	169	890	825	605	211	244	176	243	201	165	1540	980	1316	288	156	184	170	189	165	1125	1170	1246	243	253	169	222	278	111
AFUA_1G05370	640	781	1696	1335	2064	1319	2855	2154	3272	283	438	615	1448	1873	1306	2211	2598	2873	3389	1585	3336	2098	1753	1915	2336	1505	5143	1853	1288	1322	1402	1439	1405	1665	3079	3185
AFUA_1G05380	2866	2313	3291	503	623	421	1420	1301	1638	2915	3776	3065	525	681	593	1466	1441	1553	3311	2873	2863	765	625	634	1525	1168	1343	3715	3499	3600	757	929	420	1704	1853	1011
AFUA_1G05390	7422	8720	12320	25820	27366	31087	16636	17203	42719	2300	2085	2221	39705	40080	34636	20434	30558	40747	5230	4527	4511	50263	32482	42137	29822	29997	36517	4243	3754	5224	26350	36787	36226	20089	48059	24532
AFUA_1G05400	936	1117	1558	909	1377	1442	817	780	1780	172	212	218	1229	1294	1450	808	1330	1496	457	162	357	1820	1240	1864	1263	1318	1634	480	432	800	1013	1199	1626	676	2009	992
AFUA_1G05410	499	976	1388	777	877	837	794	761	2843	47	48	76	727	724	1038	1236	2433	2320	630	365	462	1176	713	1371	2618	2631	1631	325	204	244	341	730	892	407	2522	1084
AFUA_1G05420	3495	3238	4438	910	1177	1164	1222	1039	1392	1870	1888	1826	1185	987	1244	1046	1315	1276	1745	1259	1444	1762	875	1359	1493	1010	1196	2866	3740	3716	820	1062	890	818	1391	624
AFUA_1G05430	390	245	335	97	88	103	125	138	391	117	125	93	135	91	75	197	372	346	233	81	165	141	85	145	552	390	197	198	158	199	56	90	84	65	298	133
AFUA_1G05440	403	290	358	507	570	281	489	401	675	156	89	91	388	420	383	532	679	566	283	186	286	355	222	408	735	457	479	227	237	250	202	378	299	257	675	385
AFUA_1G05450	2218	1395	1657	477	508	1203	1941	1569	1069	2071	1613	1540	1165	930	1125	1778	1224	746	1259	1311	1180	1240	886	1499	1132	962	601	1236	1430	1320	1052	1305	1006	1888	1543	571
AFUA_1G05460	1704	1310	1674	485	592	529	796	633	455	1376	1380	983	983	751	516	767	440	380	1218	1462	1096	830	612	742	579	361	365	1019	1187	1086	784	942	442	817	494	257
AFUA_1G05470	2435	1805	2361	412	520	503	759	513	421	2253	1985	1624	796	572	471	559	441	362	1801	1059	1579	834	535	621	556	322	402	1519	1741	1502	570	813	424	568	453	240
AFUA_1G05490	9142	8167	11470	2956	3697	5128	6410	4238	4214	6382	7782	6779	4794	3980	4987	3963	3792	3008	9242	7519	9864	7540	4992	6771	4826	4567	3504	12260	13978	13528	5115	5281	5399	4401	4013	2171
AFUA_1G05500	1985	1956	2628	9191	7185	15219	3672	3691	5674	1426	1109	1109	19693	16876	13452	3818	5224	5840	2048	1935	1625	22920	12465	20818	4389	4371	3409	1006	823	1131	9397	17499	16204	5388	6748	2167
AFUA_1G05510	1524	1314	1855	897	1103	873	1282	914	1255	865	684	629	793	882	996	870	1102	945	986	688	882	1058	704	1073	1235	813	1075	924	980	1084	836	893	898	765	1208	612
AFUA_1G05520	226	166	174	300	292	515	388	293	243	111	83	71	704	546	557	293	209	173	143	113	113	892	445	687	274	209	180	79	87	137	685	715	565	405	192	132
AFUA_1G05530	1557	969	1219	588	528	436	787	531	536	710	419	326	525	543	519	593	463	394	897	624	996	439	272	493	496	331	547	722	739	961	324	462	374	425	680	344
AFUA_1G05540	3205	2516	2517	312	364	330	822	541	458	3340	3106	2203	285	307	357	462	434	325	1445	659	1558	438	315	348	712	290	511	1445	1860	1630	335	413	307	697	442	162
AFUA_1G05550	17	15	11	486	437	701	3835	2383	2220	18	13	7	1069	944	851	1963	1838	1578	16	5	6	1366	854	1066	2378	2139	2287	11	13	11	873	817	599	2007	2000	1362
AFUA_1G05560	4944	3898	4604	1231	1976	1281	1342	903	1355	3649	3561	2882	1276	1188	1160	957	1142	1008	3509	2608	3285	1684	1046	1474	1282	1247	1318	2812	3293	3124	987	1178	1202	755	1398	824
AFUA_1G05570	361	290	309	151	173	111	80	53	37	261	193	123	160	127	118	63	63	66	210	177	190	124	66	110	56	49	51	130	186	222	127	140	132	83	74	30
AFUA_1G05580	1061	682	1050	1007	1039	1441	1328	1090	948	511	361	369	2121	1760	1398	1094	853	854	533	331	392	2582	1586	1628	992	709	1143	467	504	597	1705	2124	1294	1309	1280	928
AFUA_1G05590	4235	3439	4002	438	732	679	830	842	965	3908	4019	3060	780	601	737	813	1002	786	1605	1673	1491	1191	819	735	983	592	684	2867	3952	4015	1202	1407	621	901	1076	437
AFUA_1G05595	1334	1207	1885	4640	6190	3610	3162	3142	3501	807	698	700	2636	3429	3717	2928	3020	2930	1271	686	1237	2487	1512	3586	2853	1754	4179	1333	1377	1218	1556	2083	2271	1020	3307	1617
AFUA_1G05600	12	7	7	58	74	66	38	42	47	11	4	6	78	47	57	39	42	29	5	2	4	92	54	87	48	33	58	3	5	1	36	45	61	33	67	20
AFUA_1G05603	0	0	0	1	0	0	0	1	1	1	0	0	1	0	1	0	0	0	2	0	0	1	3	8	0	0	14	1	0	0	3	0	0	0	1	4
AFUA_1G05606	0	0	2	5	17	0	0	2	2	0	0	0	3	2	0	2	1	0	0	3	1	5	0	3	1	2	22	0	0	0	5	3	0	0	0	0
AFUA_1G05610	2790	1794	2150	5133	4339	5324	3378	2900	3582	2151	1475	978	6860	5600	5108	3288	3442	3192	1740	1419	1668	7638	4208	5826	2733	1842	2920	1185	1220	1317	4230	6175	4364	2731	3391	2259
AFUA_1G05620	1715	1308	1900	3556	3151	2913	1811	1822	2788	697	561	386	3472	3020	3101	2192	2483	2348	1208	768	986	3532	2051	3130	1804	1525	1899	875	770	902	1977	2685	2847	1148	2943	1577
AFUA_1G05630	1821	1615	1989	12456	11323	17351	4423	4466	7630	1539	1230	1332	21769	18209	16273	4252	6472	8278	2831	2255	2282	21475	11419	21779	5271	4969	5151	1024	700	644	9427	18209	16869	5295	8984	4664
AFUA_1G05640	849	734	789	1372	1547	1487	1809	1586	1723	601	500	449	1612	1321	1467	1655	1786	1290	1109	804	949	2219	1208	1908	1844	1089	1385	579	488	448	1142	1476	1320	1335	1585	661
AFUA_1G05650	470	443	629	373	331	530	600	490	807	231	153	229	527	470	526	578	713	680	1235	805	1137	752	298	673	779	524	467	655	429	472	310	415	424	344	753	308
AFUA_1G05655	1531	1091	1590	728	769	595	852	727	794	901	655	570	816	745	665	772	892	526	1468	1125	1164	806	550	742	897	469	762	896	821	1164	595	776	573	685	885	396
AFUA_1G05660	462	381	416	387	369	365	814	792	832	326	278	202	458	436	395	806	809	791	1219	802	1180	390	186	542	849	546	532	458	285	331	161	340	324	511	920	355
AFUA_1G05670	77	63	73	230	224	129	210	190	255	66	58	49	242	268	128	231	286	151	115	76	83	206	167	116	223	230	340	88	64	97	323	302	99	103	339	144
AFUA_1G05680	177	158	209	3525	1588	1004	3501	3128	8675	129	86	127	446	547	1000	3684	8692	6496	227	80	218	848	501	774	5973	4879	5839	192	173	183	807	611	607	1615	5709	4286
AFUA_1G05690	928	667	970	1259	1696	2594	682	2391	4207	762	1069	967	1839	1709	2944	1748	4789	4127	1779	1716	1597	2256	1256	2552	2510	1122	5518	1440	1396	1395	1512	2432	1820	1452	5774	3432
AFUA_1G05700	2869	2360	3242	739	737	626	935	799	940	1858	1605	1313	672	639	617	888	811	728	2727	2234	2238	640	412	803	1068	744	781	2520	2169	2595	405	684	545	627	881	343
AFUA_1G05710	248	74	213	349	376	375	389	368	382	42	25	24	437	380	347	429	376	395	139	123	151	492	244	413	436	247	238	137	112	205	217	333	290	237	385	109
AFUA_1G05720	232	149	246	7362	7679	2285	480	549	3625	110	85	61	2997	3009	2788	692	2420	3485	268	123	222	3596	2350	2859	1588	1042	2148	94	89	92	2312	3287	1975	417	3069	1249
AFUA_1G05730	1127	820	1052	1888	2259	1517	1452	1172	1639	524	492	492	1533	1492	1494	1301	1527	1546	1552	1098	1262	2255	1473	1679	1507	1210	981	870	685	661	1644	2211	1295	1251	1588	1151
AFUA_1G05735	0	0	0	0	0	0	1	1	1	0	0	0	1	1	1	0	0	0	0	0	0	0	0	0	0	3	0	1	0	0	0	0	0	0	0	0
AFUA_1G05740	543	364	567	603	995	619	833	697	785	253	327	357	536	456	638	642	713	641	1035	577	951	658	404	784	926	487	653	622	566	768	353	511	557	607	673	357
AFUA_1G05745	3928	3062	3887	370	679	591	531	564	655	2700	2792	2217	753	662	583	711	670	625	2141	2582	1909	967	559	710	573	304	642	2575	3437	3400	628	950	572	501	631	344
AFUA_1G05750	396	232	339	123	195	309	308	224	178	208	194	155	195	156	275	208	237	181	557	181	494	332	167	310	218	127	92	423	379	380	118	161	210	116	193	51
AFUA_1G05760	698	417	516	317	376	352	574	461	464	414	318	271	533	396	445	489	479	352	709	962	675	537	315	499	468	287	326	544	527	547	253	461	331	417	457	150
AFUA_1G05770	69	27	62	8010	10072	4697	5365	8409	13229	42	38	18	4829	5248	5610	8848	13799	10777	66	42	68	5457	3898	4796	12512	7520	13482	62	51	90	3778	5477	2769	2966	16511	5805
AFUA_1G05780	5	2	3	135	98	69	48	34	40	0	0	0	66	69	70	38	30	34	3	2	0	89	43	62	32	11	57	4	6	1	36	42	42	43	33	16
AFUA_1G05790	13	4	9	5167	4503	6800	2383	2297	3105	3	7	3	14629	11087	8758	1573	2575	2501	6	8	2	15126	7839	10520	2390	1440	1706	7	4	1	9430	12279	11280	3847	2224	1787
AFUA_1G05800	3830	3779	5617	10312	9335	4229	5606	4335	7097	2200	2511	3626	4338	4641	5009	3832	5394	5745	5344	2845	4518	5452	3684	4780	5532	4361	7636	3919	2852	2256	4091	4321	3830	3288	5797	5229
AFUA_1G05810	1357	847	1291	923	1242	1142	1535	1208	1477	509	576	447	1066	1086	1209	1111	1336	1211	1132	829	1151	1465	960	1434	1444	658	1317	915	990	1163	925	983	1138	873	1397	818
AFUA_1G05820	1550	1042	1319	1670	1561	2126	1305	1056	1370	961	597	533	2279	2228	1846	1160	1244	1236	1502	1335	1255	2914	1977	2961	988	786	1118	808	637	670	1835	2434	2099	1687	1667	898
AFUA_1G05830	7420	6278	7540	2212	3192	2823	2180	1618	2390	6676	6650	5341	2071	2201	3163	1496	2069	2022	4555	3087	4631	3199	2264	3326	2069	1641	2836	6239	7554	6709	2407	2012	3166	1239	2662	1742
AFUA_1G05840	268	218	359	1010	1105	1347	778	706	822	126	152	223	1636	1407	1610	751	749	767	293	147	272	1881	950	1563	666	401	560	469	573	496	1118	1328	1603	596	834	457
AFUA_1G05850	895	829	1407	109	144	142	61	87	103	762	1304	1667	78	114	113	86	115	84	1868	2778	1851	151	160	177	71	67	104	1789	1808	1359	297	146	272	96	171	26
AFUA_1G05860	2160	1415	1855	157	211	130	58	64	120	1519	2393	2038	73	113	185	114	130	82	1554	2691	1394	129	98	229	149	62	225	1722	2096	2529	88	102	124	70	182	50
AFUA_1G05870	2384	1939	2307	1091	1802	1421	1023	1469	1795	1869	2112	1951	1235	1397	1788	1334	2046	1928	1268	1617	1232	1618	1255	2068	1323	970	3315	2135	2554	2905	1608	2213	1600	1411	3410	2295
AFUA_1G05880	62	65	46	35	50	13	40	17	18	50	29	25	23	22	29	15	20	22	27	16	13	28	16	35	24	20	25	15	29	23	29	31	24	32	32	15
AFUA_1G05890	60	36	43	32	54	23	56	29	32	59	39	29	24	34	26	36	31	17	29	36	19	25	31	29	30	28	23	36	37	42	16	26	16	46	39	6
AFUA_1G05900	1546	1552	2296	2055	2554	2147	3139	1846	2287	753	781	798	1495	1892	2509	1446	1662	1994	2497	1220	2226	2569	1978	2972	1961	2330	3059	1389	1116	1608	1629	1669	2506	1456	2816	2969
AFUA_1G05910	1175	1299	1621	196	350	491	910	779	473	1117	1776	2246	529	366	510	675	646	364	2125	2317	1843	641	385	437	631	631	304	1536	1573	1391	505	634	473	724	498	487
AFUA_1G05920	299	259	270	1555	1833	1620	959	773	1201	221	267	203	1696	1707	1811	735	879	1057	131	95	86	2136	1327	2175	628	653	1241	146	158	248	1568	1790	1904	672	1413	1134
AFUA_1G05930	1584	843	1250	1713	2127	2023	3479	2520	2014	668	649	449	2574	2307	2198	2724	2263	1554	965	750	813	3029	2007	2694	2662	1447	1476	813	759	1311	2005	2306	1944	2112	2034	764
AFUA_1G05940	545	376	482	554	710	518	676	482	573	493	461	376	544	612	490	477	528	465	449	383	338	537	334	679	598	466	550	285	249	298	270	589	392	815	655	233
AFUA_1G05950	10	1	9	612	975	1228	3550	2620	2904	2	1	17	788	1007	1311	2107	2506	2417	11	1	6	1188	835	1899	2887	2568	2236	9	9	4	640	878	1328	3419	2890	1388
AFUA_1G05960	138	96	177	450	451	1001	1561	1274	1077	42	82	67	1074	993	977	1472	1198	884	325	234	318	1621	974	1115	1240	600	639	191	138	167	1069	1377	792	927	993	543
AFUA_1G05970	1392	1462	1859	1858	2073	1927	4514	3347	3099	820	860	769	1970	1856	2081	3037	2688	2640	1408	886	1400	2292	1523	2096	2708	2927	2425	940	939	1329	1876	1970	1819	2484	3502	2032
AFUA_1G05980	898	654	701	488	569	1020	1882	1458	1384	719	699	563	1264	1061	1142	1560	1394	1254	582	432	536	1622	1061	1200	1408	795	1244	407	427	548	1397	1456	1003	1617	1503	701
AFUA_1G05990	3696	4181	4870	11433	9126	16748	4637	4259	7126	2832	2299	2633	22350	18263	16322	3890	5605	8585	5071	4311	4154	24642	13259	21755	4756	4534	4067	2687	2284	1857	9981	18119	17342	5293	8795	3027
AFUA_1G06000	58	60	35	235	253	142	235	186	140	31	40	28	174	165	152	180	126	148	57	45	46	190	134	145	243	225	127	45	54	54	182	217	158	358	216	87
AFUA_1G06020	94	38	54	5424	7169	5391	5907	4302	3542	40	51	27	4189	4924	6164	2975	3123	3029	97	45	105	7144	6075	6148	2539	2430	5138	87	90	76	11901	7307	8492	2345	3559	4884
AFUA_1G06030	1730	1186	1916	1757	1743	1880	1719	1461	1941	459	460	353	2138	1920	1701	1377	1785	1464	1525	949	1522	2493	1328	2108	1716	1134	1528	1107	945	1525	1292	1757	1748	1381	1763	1031
AFUA_1G06040	2459	1550	2032	3551	6196	1658	1510	2153	7992	1602	1173	792	2585	3548	1623	1870	5706	8854	881	460	835	2699	2541	1855	4177	3796	15551	990	1126	1544	2295	3000	1440	2989	11433	12567
AFUA_1G06050	2337	1887	2501	1406	1801	2271	3688	3015	2682	1552	1767	1561	2699	2409	2382	2903	3034	2671	1951	1565	1930	3927	2909	2640	3145	2764	2035	2031	2369	2228	3287	4041	2333	3050	2798	1975
AFUA_1G06060	4915	4629	5341	3820	4933	4253	4563	3727	3532	6324	6912	5079	3858	3804	5047	3495	3062	2842	2889	1604	2596	5580	3693	5083	3412	2602	3181	3358	4398	4001	4103	3823	4360	3053	3514	2347
AFUA_1G06071	2868	2067	3147	2323	2875	1952	1378	1449	2051	1815	1716	1430	1903	2169	2192	1465	2036	1654	2568	2121	2460	2332	1785	2420	1956	1371	2802	3181	3341	3459	2230	2519	2053	1143	2312	1726
AFUA_1G06080	501	424	890	2435	1885	1917	2520	2409	4289	163	303	423	1877	2208	1747	2843	3789	3523	1351	1301	1103	2265	1585	2142	3458	2482	3764	977	719	627	1677	2442	1728	1322	3969	2969
AFUA_1G06090	128	139	107	1528	1570	1722	2193	1807	1834	72	56	60	1838	1515	1820	1552	1698	1360	91	64	74	2272	1267	1888	2045	1627	1375	63	80	128	1526	1612	1608	1779	1817	803
AFUA_1G06100	6097	5718	6353	718	917	718	503	510	693	5442	4669	4002	905	831	531	578	534	463	2535	3499	2493	1196	708	846	627	439	333	3815	5332	5709	538	1382	502	511	799	258
AFUA_1G06110	617	427	806	1326	1348	2054	1164	1104	1483	288	459	509	1843	2091	2156	1095	1378	1338	1865	2346	1912	2830	2286	2527	1160	792	1405	1148	869	862	3196	3237	2515	1105	1722	853
AFUA_1G06120	0	0	3	9	25	6	3	1	5	4	1	0	7	18	9	0	2	4	8	9	8	15	12	8	0	5	0	4	0	1	7	14	11	0	1	0
AFUA_1G06130	0	1	1	16	19	3	49	23	14	0	0	2	33	2	6	30	11	19	0	0	0	14	16	16	27	44	12	0	2	0	7	10	3	22	24	0
AFUA_1G06140	0	0	0	22	22	17	34	38	14	0	0	0	22	18	6	14	8	12	0	3	1	10	7	6	19	23	5	3	0	0	16	17	6	39	3	12
AFUA_1G06150	24	18	28	539	752	383	1131	635	630	35	10	20	480	545	317	710	435	455	21	11	13	468	356	283	786	3909	478	21	15	14	530	545	311	848	657	609
AFUA_1G06160	35	16	28	365	363	218	471	331	356	32	5	12	216	209	223	352	398	208	25	13	26	233	100	134	552	332	233	14	19	22	187	168	93	103	231	122
AFUA_1G06170	5606	4861	6854	3738	4144	5509	4292	3332	3982	3311	3813	3831	5727	5452	5861	3137	3501	3617	8738	7284	8011	8498	5777	7331	3393	3567	3342	5602	5074	4868	6493	7165	5757	3809	4091	3055
AFUA_1G06180	4321	2606	3050	2243	2122	2025	2078	1714	2060	2499	1837	1210	2518	2363	2138	1828	1730	1553	2622	2186	2092	3231	2351	2491	1894	1907	1483	1905	2065	2619	2572	3145	2160	2072	2412	1164
AFUA_1G06190	448	811	970	2962	2997	1702	1357	1407	3904	84	75	77	2187	2004	1774	1687	3052	2958	272	98	238	1600	887	2065	3571	4462	3247	171	151	219	561	1324	1328	752	3725	1416
AFUA_1G06200	62	25	32	538	595	716	540	492	507	24	17	15	874	681	739	549	527	378	28	20	30	958	568	953	585	406	410	6	5	5	587	748	630	465	464	141
AFUA_1G06210	1377	838	973	2330	2598	3640	4701	3800	2937	798	528	376	5526	4413	3708	3984	3058	2822	1309	729	1143	5587	2922	4169	3458	2389	1873	669	595	709	3079	4026	3521	3015	3088	1380
AFUA_1G06220	134	226	269	361	270	380	269	272	1002	25	8	17	482	360	374	416	813	867	171	129	117	604	259	628	865	919	631	48	45	64	174	380	366	211	843	503
AFUA_1G06230	776	738	1294	1037	946	713	657	647	1722	158	117	96	853	835	739	874	1511	1267	1483	1361	1320	1251	645	1226	1920	1685	1355	695	538	599	312	737	645	456	1440	598
AFUA_1G06240	968	606	718	1377	1508	2770	2176	1986	1399	603	403	333	3198	2505	2592	2158	1667	1383	1065	959	963	4142	2480	3284	1448	1401	1090	439	387	429	2845	3509	2380	2273	1848	893
AFUA_1G06250	1023	575	643	538	759	773	656	439	473	385	328	242	738	606	645	397	385	369	324	245	294	1117	550	813	377	447	312	262	289	396	683	760	652	392	453	183
AFUA_1G06260	310	318	411	282	332	447	369	260	366	157	235	177	379	388	444	279	307	377	485	337	441	587	361	536	330	220	352	331	282	244	343	385	362	322	375	208
AFUA_1G06270	1672	1593	1601	237	218	252	285	228	186	1951	1726	1380	361	295	290	263	191	178	1173	1245	1028	434	257	299	195	196	155	813	1170	939	263	332	240	209	282	100
AFUA_1G06280	762	700	920	934	839	924	1518	1374	2108	281	263	280	1240	1109	992	1593	2013	1817	804	744	785	1309	819	1204	2025	2004	1196	553	554	515	923	1371	923	919	2040	847
AFUA_1G06290	787	836	1131	657	611	791	964	909	1793	261	221	203	775	754	777	1147	1613	1487	1149	461	1032	1088	602	863	1692	1926	1208	542	470	523	557	864	632	561	1685	594
AFUA_1G06300	1676	1442	1909	1608	1487	2679	1672	1399	1699	871	851	915	2923	2469	2392	1393	1565	1596	2134	1754	2148	3546	2163	3092	1556	1099	1199	1044	974	1229	2183	3092	2437	1577	1616	1020
AFUA_1G06310	1886	1899	2611	1936	2040	1940	2219	1817	2549	933	897	1006	2155	2145	2260	2109	2023	1902	2638	2054	2648	3047	1771	2454	1917	1485	1981	1654	1160	1315	1714	1918	1963	1566	2291	1433
AFUA_1G06320	1846	1525	1942	3131	3366	2139	2392	1933	2677	1161	1186	1038	3452	3391	1985	2115	2270	2245	1910	1400	1853	3020	1893	2446	2414	2193	2014	1284	1104	1332	2124	2771	2051	1715	2894	1328
AFUA_1G06330	1188	945	1103	3007	3911	4744	2794	2277	2400	967	840	574	4078	3564	4818	2048	2127	1988	852	499	824	7443	4240	5900	2196	2293	1520	817	906	921	3628	3712	4667	2437	3079	799
AFUA_1G06340	5040	5033	5594	9550	8880	18566	4733	4743	6690	4587	3544	3771	21238	17196	16020	4206	6514	7418	7392	7066	5754	23953	11947	23442	5155	5510	3552	2845	2452	2389	9702	18961	18522	5208	8073	2619
AFUA_1G06350	4179	2455	3828	3072	2553	2320	971	1025	1474	1603	1265	1138	2361	2398	2461	1478	1402	1146	2933	2710	2892	2231	1301	2091	1532	801	2265	7348	7611	7850	2120	2265	2198	1007	1950	2675
AFUA_1G06360	855	686	926	283	282	227	172	184	192	634	623	555	447	346	323	191	157	169	677	760	567	467	263	381	213	106	159	953	878	951	262	462	247	170	231	67
AFUA_1G06370	391	264	370	811	799	919	800	816	1099	99	82	49	1382	1203	940	1043	1050	920	399	256	267	1315	762	1322	982	661	928	178	172	251	676	1270	813	790	1211	531
AFUA_1G06380	828	595	959	1251	1586	578	834	721	1376	577	557	312	675	797	669	914	1202	934	1370	1017	1197	573	344	844	1250	1131	1170	953	785	970	361	594	485	520	1380	611
AFUA_1G06390	14140	17967	26274	53474	51023	77247	59154	56764	78248	5946	5325	6371	134274	105535	90165	67600	66722	73163	17250	14205	14914	140270	78113	110280	60457	56603	51410	13528	9337	12454	69439	111710	86548	43385	98693	39365
AFUA_1G06400	2645	2644	3671	3396	4649	3246	3165	4486	7135	2131	1964	1903	2195	2293	3751	4632	6415	5521	2004	867	1921	3510	2530	3787	7048	4421	6897	2326	2655	2820	2408	2498	2727	2214	6646	4033
AFUA_1G06410	1001	624	1074	3828	4008	2988	2864	4066	5413	278	237	214	1723	2422	3656	5049	4913	4615	1274	818	1108	2386	1608	3463	4730	3245	5533	995	732	1274	1942	2247	2461	1357	6126	3163
AFUA_1G06420	3599	2649	3843	1446	1757	1933	3818	3177	2783	1672	1876	1550	1758	1995	2029	3182	2715	2564	2866	2728	2609	2069	1722	2224	2215	2395	2707	2784	2651	3197	2095	2462	1702	3033	3443	2227
AFUA_1G06430	1199	778	1172	385	460	579	893	703	584	691	754	634	522	492	602	662	599	500	1122	725	1094	690	462	720	551	501	495	895	845	1052	456	611	524	751	712	355
AFUA_1G06440	765	508	701	465	664	415	672	552	385	322	364	259	441	444	524	410	390	319	629	616	573	641	511	559	507	455	569	499	452	708	679	532	641	506	585	251
AFUA_1G06450	33	26	38	323	395	194	274	189	258	47	35	27	167	240	187	287	213	241	111	90	74	173	242	267	267	190	326	66	65	89	247	236	257	226	302	201
AFUA_1G06460	305	289	453	407	448	600	544	515	701	86	110	131	523	595	512	516	653	656	538	330	466	605	351	699	655	563	527	266	187	325	362	464	593	348	761	521
AFUA_1G06470	3101	2287	3440	257	292	289	1269	1135	901	1987	2101	1601	473	464	298	1165	827	774	2091	1369	1998	1184	686	349	1218	764	473	3128	4016	3643	814	1060	222	1044	746	261
AFUA_1G06480	989	999	1199	400	423	104	617	429	543	555	567	455	457	546	181	348	352	465	542	451	402	372	279	132	285	434	439	827	961	1127	365	450	116	304	341	194
AFUA_1G06490	2769	1827	2596	1376	1986	854	1099	998	997	1368	1179	858	1172	1107	921	1139	1038	598	725	574	620	996	773	898	1127	870	878	1354	1433	2013	966	1547	752	874	1105	277
AFUA_1G06500	1559	1035	1405	1139	1332	1095	2039	1799	1788	990	901	649	1349	1238	1206	1813	1982	1445	948	868	888	1626	974	1403	1989	1475	1448	1139	1331	1289	1112	1531	1019	1947	2138	950
AFUA_1G06510	2226	1732	2029	679	992	793	1135	1194	857	1876	1957	1390	836	957	1142	1233	1219	943	1242	1398	1007	948	556	1069	825	616	692	1416	1561	1649	700	1178	746	1177	1444	312
AFUA_1G06520	1597	1439	2121	2093	2031	1961	1912	1829	3596	670	600	579	1574	1672	2136	1994	3085	2826	1361	910	1255	1987	1114	2426	2900	2700	3242	998	831	1095	841	1201	1398	823	3375	1298
AFUA_1G06530	1111	806	934	2830	4529	1840	1434	1187	2848	548	494	322	1442	1625	2054	1295	1888	2465	780	608	740	1633	981	2338	1457	1549	5178	506	515	505	1051	1214	1777	971	2774	2530
AFUA_1G06540	594	319	338	471	548	379	1100	724	723	501	218	222	385	459	366	839	662	555	245	137	210	379	295	398	766	751	542	165	153	208	363	376	301	737	907	259
AFUA_1G06550	232	163	217	405	490	195	291	194	214	140	110	119	298	231	187	187	179	133	156	96	158	310	258	231	265	246	220	133	95	141	239	277	168	197	204	103
AFUA_1G06560	8	4	9	48	84	58	99	48	38	9	6	2	38	56	89	47	42	27	3	1	4	65	61	49	51	46	49	7	3	7	40	49	60	53	59	18
AFUA_1G06570	960	928	1311	1723	1887	1517	1003	1029	1785	291	242	245	1447	1563	1610	1137	1319	1561	866	579	605	1832	1247	1987	1219	1227	1778	389	367	372	1035	1324	1403	805	1870	921
AFUA_1G06580	3427	3915	4032	114649	75509	59189	159197	142731	211292	3055	2583	3180	48889	59485	63477	153740	186594	180011	3125	2679	2080	64481	58815	73407	140147	164891	218165	3709	4446	3556	79643	90150	53080	112965	202725	198769
AFUA_1G06590	881	615	576	4179	4156	2769	13788	9296	6555	665	529	318	1864	2490	3117	8857	7234	4628	347	225	218	3403	2879	3303	8910	9060	6039	267	327	358	4748	4584	3086	11259	8304	3306
AFUA_1G06600	2116	2036	2927	2343	2828	1661	1910	1560	3724	1193	1158	1114	1818	1836	2214	2199	2868	2719	1664	1666	1567	2446	1580	2757	3212	3094	3167	1230	1032	1230	1005	1666	1907	897	3582	1829
AFUA_1G06610	1344	1126	1364	2408	2405	2385	1254	1151	2116	631	570	642	2573	2504	2421	1224	1647	1787	1391	954	1289	2956	1719	3160	1452	911	1894	927	792	770	1724	2304	2394	933	2018	1373
AFUA_1G06620	3075	2548	3126	3018	2479	3759	2356	2091	3023	2158	1568	1472	4543	4478	4385	2203	2619	3238	3020	2605	2354	5559	3370	5461	2541	2115	2560	2012	1742	1584	3542	4924	4151	2578	3885	1842
AFUA_1G06630	1732	1038	1630	1526	2381	986	1020	926	1182	976	663	453	1235	1341	1187	975	1137	899	858	559	699	1356	881	1356	1131	699	1469	795	845	921	821	1254	1061	805	1326	833
AFUA_1G06640	2234	2088	3625	167	258	88	962	642	250	1307	2154	2533	118	153	103	764	306	180	3091	3627	3345	200	107	131	549	573	95	4253	4041	3016	128	211	90	304	361	29
AFUA_1G06650	665	511	539	315	477	301	19411	11316	5223	612	608	411	673	773	300	11265	6598	4391	215	249	215	1235	696	390	13390	9588	483	312	457	552	1699	1918	241	12786	5269	192
AFUA_1G06660	10667	6489	7209	2054	1635	2254	2482	2252	2065	8452	6947	4753	2470	2360	2361	2173	1879	1793	4688	3960	4088	3386	2296	2537	1531	1242	1412	4511	4457	5733	2630	3128	2348	2081	2031	1194
AFUA_1G06670	10219	7162	9043	499	339	58	173	136	245	9228	8403	5888	223	251	84	185	229	148	6355	5108	7486	374	247	140	357	276	140	5061	3784	4033	326	183	50	88	55	19
AFUA_1G06680	3519	2025	2655	5424	5178	2991	3088	2918	3737	2530	2329	1919	2246	2283	3038	2924	3384	3060	1928	1237	1807	3094	2150	3241	2331	1711	4548	1494	1448	2009	2245	2244	2650	2142	3383	3901
AFUA_1G06690	2340	2004	3042	1939	1551	1487	1432	1446	2047	1763	1776	1873	783	940	1386	1444	1848	1544	2410	1962	2330	985	581	1379	1271	1300	1617	2077	1985	2148	617	736	931	522	1780	1315
AFUA_1G06700	3058	1961	3026	9779	6584	6171	15394	14028	23489	1811	1633	1349	5046	5026	5791	17411	24225	16272	1728	1268	1593	7294	4800	6730	24957	21559	19630	1673	1666	1931	5122	5511	4892	8822	20955	10019
AFUA_1G06710	1445	945	1165	2391	2188	3893	3470	2782	3091	694	447	442	4270	3400	3700	3081	3208	2624	1563	1149	1395	5818	3143	4753	3472	3092	1720	721	542	767	2780	3692	3755	2784	3352	1362
AFUA_1G06720	6425	4172	5196	1020	1098	1008	2699	1995	1658	5262	4612	3409	807	818	1107	1914	1637	1316	3169	2413	3441	758	535	1108	1839	1759	1333	4710	5722	4902	597	741	783	1240	1891	789
AFUA_1G06730	5022	3632	5014	169	212	130	86	83	133	4600	4792	4275	283	170	143	125	81	99	2152	2314	2328	197	90	152	130	54	92	4454	6247	5872	217	234	119	86	94	60
AFUA_1G06740	1609	1599	2216	773	1079	841	640	722	787	1159	1211	1121	709	964	926	547	777	679	1508	1889	1334	707	520	1075	605	427	1301	2137	2445	1985	739	816	686	756	1047	654
AFUA_1G06762	1984	1731	2179	1054	1309	709	958	1050	1455	1368	1337	968	906	821	869	1137	1495	1099	735	602	584	1299	760	840	1233	790	1523	1431	1968	2303	999	1152	580	829	1442	809
AFUA_1G06770	4458	4079	4136	15048	13970	22136	5399	5499	8482	4963	4043	4400	26943	23287	19186	4998	7356	9820	6357	5886	4527	29455	17184	28299	5980	6160	6387	1681	1391	1365	15439	25321	22668	7609	11810	5401
AFUA_1G06780	63	50	56	3845	4579	5007	2651	2151	2647	22	40	26	3957	4122	5136	2208	1986	2489	40	45	38	5308	3529	5176	1912	1866	2295	31	42	55	5824	4472	5990	1848	3012	1718
AFUA_1G06790	2244	1499	2218	1949	2152	3372	3371	2989	4094	1188	1068	921	3853	3194	3662	3234	3813	3209	1884	1135	1879	4891	2582	4102	3933	3246	1998	1674	1368	1709	1969	3111	3249	2228	4075	1259
AFUA_1G06800	99	37	51	203	194	142	602	414	355	23	26	22	244	209	125	593	310	296	121	93	99	352	210	230	464	317	250	73	47	62	205	302	140	478	339	154
AFUA_1G06810	282	205	352	1202	1102	2433	1125	809	1027	97	97	81	2088	1975	1894	866	843	839	483	315	437	3356	1650	2891	989	815	412	257	181	272	1327	1606	2509	718	952	328
AFUA_1G06820	16311	13593	16702	2403	3273	2473	2062	2096	2800	12974	13182	10937	2331	2387	2556	2096	2596	2510	10350	9250	9198	3268	2417	2765	2121	1587	3794	12099	15144	15176	3115	3321	2307	2482	3734	2499
AFUA_1G06830	5602	4855	5655	12142	10787	19312	5582	5400	8477	5013	4003	4250	23143	19744	18179	5220	7672	9778	7410	6143	5719	26117	13667	25173	6589	6205	5212	3336	3000	2865	11682	19500	19870	7164	10694	4907
AFUA_1G06840	893	767	946	825	1030	519	320	265	601	299	268	203	472	543	515	311	484	434	640	419	598	512	278	640	493	485	612	533	476	579	209	340	386	143	488	320
AFUA_1G06850	2549	2232	2500	503	654	1100	813	829	892	3179	3726	2944	922	832	1114	765	905	943	2308	2237	2201	1341	813	1421	954	572	820	2433	2802	2239	750	973	907	697	1127	657
AFUA_1G06860	3743	2571	3700	1307	1250	2068	2806	2286	2647	1774	1624	1397	2198	2106	2285	2394	2440	2405	2575	2151	2241	3643	2080	2538	2698	1593	1879	3385	3764	4107	2389	2695	2188	2175	2525	1536
AFUA_1G06870	112	93	97	162	194	140	89	116	192	110	80	48	250	181	183	129	183	184	111	77	115	276	145	221	170	188	125	59	61	66	111	195	226	63	182	88
AFUA_1G06880	121	107	167	195	184	207	107	89	238	115	77	45	181	202	253	107	178	213	163	75	156	332	134	271	204	137	169	85	97	85	101	151	208	42	216	89
AFUA_1G06890	553	327	519	1381	1133	1091	2188	1751	2094	183	250	154	1424	1277	1173	1970	2187	1776	451	291	422	1586	871	1462	2305	1572	1225	432	354	511	1014	1562	1039	1223	1843	723
AFUA_1G06900	1325	1217	1692	1928	1801	1530	1996	1509	1662	675	789	714	1487	1577	1749	1406	1416	1213	2093	940	1724	1572	1084	1500	1236	869	1311	1268	1150	1239	1223	1162	1261	969	1268	1191
AFUA_1G06910	113	36	117	277	313	121	473	359	340	34	17	36	164	165	149	395	321	261	51	46	41	185	122	175	342	339	259	79	23	68	105	160	113	401	318	185
AFUA_1G06920	2380	2396	3051	1730	2306	1902	2460	1876	1809	2217	2349	2258	1720	1581	1990	1591	1448	1735	3037	1495	2960	2431	1473	1884	1784	1546	3218	2843	2866	2378	1544	1308	1788	1585	1873	1868
AFUA_1G06930	40	22	31	266	326	382	863	746	342	24	28	8	533	350	366	704	440	361	29	7	30	617	296	415	356	230	260	7	10	30	400	385	320	571	495	189
AFUA_1G06940	540	375	510	4022	4063	4116	1363	1247	2155	149	133	87	5157	5256	4642	1837	2041	2064	465	264	342	5778	4004	4393	1864	1002	2255	185	140	214	5959	6099	4695	887	2022	1751
AFUA_1G06950	477	401	561	1288	1215	926	394	306	564	154	155	172	1146	1298	957	366	421	484	648	507	595	1463	968	1076	471	202	480	447	349	398	1226	1368	1029	276	454	229
AFUA_1G06960	1511	1513	2122	7317	7120	7391	2428	2189	4261	532	404	367	9653	9278	7104	2241	3040	4070	1610	1083	1352	12187	7172	9064	2834	2483	3334	877	651	807	6740	8651	8525	2371	4430	2967
AFUA_1G06970	284	205	417	604	337	406	947	897	1497	50	68	76	459	409	429	1134	1202	1208	578	456	535	517	337	579	1401	833	1057	251	226	155	365	407	383	504	1095	688
AFUA_1G06980	1237	1528	2494	1496	1414	1867	1175	1080	2365	336	336	331	1760	1977	2146	1195	1814	2311	1357	786	1051	2559	1642	2682	1689	1695	2193	702	599	666	1300	1651	1999	749	2445	1845
AFUA_1G07000	1959	1584	2369	458	606	687	626	734	1057	864	813	761	591	597	684	765	973	709	1189	1008	1018	726	423	879	1107	912	886	1627	1957	2085	411	569	486	578	1397	304
AFUA_1G07010	4212	4084	5700	1660	2099	1861	1667	1564	2743	2733	2874	3386	2087	2046	1931	1739	2607	2304	3744	2699	3350	2371	1330	2036	2444	1877	2290	3764	4345	3784	1241	2012	1634	1381	2735	1698
AFUA_1G07020	1393	897	1489	778	919	596	672	514	875	499	461	415	645	709	693	559	653	647	747	594	769	702	539	640	668	665	805	1016	977	1303	476	603	573	340	727	535
AFUA_1G07030	89	61	44	29	122	47	77	51	50	37	47	26	52	53	65	56	50	22	61	71	85	63	72	91	37	35	38	86	111	132	93	89	73	38	69	11
AFUA_1G07040	2689	1875	2641	909	1320	1172	420	576	1198	1342	1691	1958	1198	1254	1135	623	1096	1203	1875	2277	1486	1551	1205	1187	913	435	1387	2729	3042	3538	2434	2695	1358	716	1461	1129
AFUA_1G07050	3086	2226	3283	653	708	777	1034	748	934	1511	1547	1212	922	802	962	800	849	755	2964	1522	2591	1322	890	952	990	540	694	2517	2627	3523	805	898	773	832	799	526
AFUA_1G07070	1845	2337	3424	2175	2224	1432	1789	1756	3460	883	1232	1398	1400	1591	1548	1655	2840	3059	2360	1470	2165	1800	1311	1631	3546	3549	3777	2287	2230	2111	1544	1512	1322	1146	3062	2679
AFUA_1G07080	287	203	330	327	275	206	101	107	116	72	85	101	272	258	241	96	108	135	339	275	296	388	190	329	113	63	108	251	252	362	175	187	173	77	131	55
AFUA_1G07090	3593	2942	4342	5786	4756	4542	4627	4039	6069	1999	2161	2065	5773	4579	4987	4391	5243	4927	2845	1989	2680	7165	3741	4910	5643	3892	4596	3255	3340	3657	3269	5063	3740	3068	5158	2792
AFUA_1G07100	2124	2006	2578	1150	1519	1028	1687	1429	1724	1336	1307	1134	1107	1100	1126	1702	1661	1469	1187	1374	1048	1077	678	1171	1746	1316	1694	1468	1618	1655	1309	1403	1037	1531	2021	1295
AFUA_1G07110	144	76	109	5362	8862	2654	2428	2247	3511	64	34	24	3076	3756	3393	2321	3292	2815	115	33	62	3258	2143	3633	2262	1743	5026	50	39	50	2700	3628	2495	1509	3637	2801
AFUA_1G07130	689	366	544	1101	1403	1706	1121	1073	1141	417	210	162	1993	1816	1677	1353	1285	1114	303	259	303	2094	1296	1888	1026	835	1012	310	319	324	1587	2180	1507	990	1387	922
AFUA_1G07140	293	174	235	740	1047	836	312	268	417	136	79	72	845	798	808	195	399	322	198	53	177	670	362	940	317	249	285	123	102	161	333	530	820	190	447	119
AFUA_1G07150	2424	2106	2775	1456	1973	1540	2153	1647	1966	1603	1754	1829	1855	1644	1896	1943	1928	1570	3169	2404	2668	2518	1544	2058	2159	1176	1813	2708	2636	2329	1702	2095	1700	1516	2145	947
AFUA_1G07160	1095	916	1500	760	1011	1030	2063	1353	1532	613	572	635	979	799	1119	1251	1287	1217	1119	299	966	1401	704	1199	1928	1569	1057	812	902	930	783	850	994	1314	1529	739
AFUA_1G07170	1030	678	868	1192	1151	988	1190	956	808	504	364	286	1116	977	814	895	822	681	802	422	739	1187	712	996	1148	626	855	696	643	688	751	955	806	1035	834	409
AFUA_1G07180	1213	1002	1345	752	969	1216	1226	949	1082	583	503	424	1488	1151	1049	1094	1003	748	1019	883	840	1722	1014	1374	1025	699	834	731	632	861	1211	1711	933	1017	902	459
AFUA_1G07190	219	171	95	44	66	64	51	39	35	113	77	54	50	66	53	38	26	22	41	30	38	66	70	70	56	23	44	35	46	61	40	43	40	84	37	4
AFUA_1G07195	553	434	528	296	310	347	649	312	314	303	240	278	491	409	317	346	213	232	421	408	467	530	303	540	424	260	360	362	412	406	412	421	392	425	438	268
AFUA_1G07200	688	456	574	2103	2437	2055	5594	3458	2118	432	396	317	1836	1891	2283	3190	2046	1425	475	358	442	2103	1435	2493	2945	2813	1879	332	377	367	2266	1998	2433	3557	2481	1069
AFUA_1G07210	570	465	514	603	591	499	504	498	744	420	413	374	812	813	555	587	597	580	755	396	638	681	560	602	605	565	480	381	382	344	675	737	607	431	702	426
AFUA_1G07220	4967	3887	5284	4713	6135	8512	14666	8866	8854	3449	3450	2896	5137	5694	8883	8754	9080	6602	2974	1962	2667	7968	6405	8288	13242	11028	7786	3492	3901	3931	10445	5598	10960	8655	9338	4318
AFUA_1G07230	169	139	188	434	536	624	470	360	318	63	74	86	773	678	824	452	386	255	119	99	92	878	559	821	510	326	364	100	124	163	409	671	566	465	513	237
AFUA_1G07240	10447	8999	11647	1209	1738	749	1344	974	624	8454	8643	6698	819	1017	785	867	875	401	5870	4655	5329	1152	923	864	944	899	707	8048	10219	10625	1273	1228	845	1254	951	330
AFUA_1G07250	6327	4855	7054	2096	2765	2125	1329	1032	1905	4362	4668	4037	2395	2434	2283	1215	1534	1473	3998	3264	4338	2324	1397	2149	1460	905	1928	6600	7435	6826	1670	2079	1825	904	1572	1328
AFUA_1G07260	741	626	926	868	768	1090	1140	939	1391	308	318	396	1684	1285	1080	1007	1221	1199	1307	972	1191	1610	837	1244	1470	822	978	906	771	693	987	1490	961	862	1273	525
AFUA_1G07270	2174	1513	1747	520	810	570	622	722	1397	1036	874	543	753	815	541	887	1168	763	1028	1143	1163	575	437	726	1009	498	748	1327	1418	1760	387	668	557	773	1102	290
AFUA_1G07280	565	383	603	1405	2054	1768	774	484	920	270	297	267	1368	1801	1686	381	657	895	616	323	574	2222	1870	2537	449	603	1630	395	289	462	1358	1504	2136	766	1035	1715
AFUA_1G07300	1531	1129	1853	718	893	982	554	581	1126	548	673	614	1082	1003	966	613	1156	904	1192	1163	1146	1791	1191	1131	960	455	1072	1378	1280	1596	1262	1802	1036	612	1112	892
AFUA_1G07310	1695	1596	2240	540	811	663	635	627	1085	971	1244	1053	769	769	726	651	1010	1002	1476	1208	1215	781	576	819	961	583	1544	1710	1712	1915	621	730	539	508	1335	882
AFUA_1G07320	622	464	558	1134	1807	1159	540	452	564	344	292	202	1476	1238	1073	452	538	465	320	270	208	1642	817	1410	506	551	438	251	328	371	765	1332	1121	451	722	214
AFUA_1G07330	44	50	58	49	97	54	33	19	14	41	23	13	47	58	38	15	18	18	22	6	16	61	43	33	8	12	30	23	28	47	32	55	39	19	24	7
AFUA_1G07340	1357	1095	925	134	122	205	227	232	175	1057	885	521	236	219	194	172	140	134	581	493	542	281	134	255	210	166	122	628	709	522	167	261	169	167	168	89
AFUA_1G07350	10784	8767	9835	1138	1852	1198	999	1558	2811	10473	9785	7645	1755	1755	1386	1144	2976	2550	4496	4418	4037	2802	1785	1639	2300	979	3317	6538	8540	7676	2296	2638	1087	1678	3162	1590
AFUA_1G07360	1387	1460	1951	589	549	526	534	555	1147	1097	1296	1050	736	807	639	669	846	1025	1904	1555	1425	771	496	789	823	517	1109	1303	1322	1149	489	720	564	617	1205	720
AFUA_1G07370	86	69	82	31	47	48	8	9	17	62	50	35	54	60	31	12	13	11	27	17	14	129	91	137	14	10	29	32	41	76	36	61	63	18	27	4
AFUA_1G07380	2779	2730	3637	18642	26419	44216	10488	8776	7243	1793	2229	2107	32109	29387	52088	7700	7643	6556	2307	1292	2191	54851	31963	60902	8523	3522	6862	2577	2750	2495	23067	21598	50822	6498	8912	4103
AFUA_1G07400	77	39	48	407	756	1770	223	182	331	25	22	36	1086	1006	1440	219	333	362	248	164	175	1356	839	1712	389	177	326	98	95	61	1849	1299	2593	344	487	175
AFUA_1G07420	4895	4298	5663	747	1008	1055	1088	965	1087	3281	2794	2440	1052	995	991	828	1104	912	3866	2746	3643	1183	724	1249	1190	760	863	4662	5350	5399	953	975	982	880	1080	533
AFUA_1G07430	4833	4205	4806	3170	3213	5792	2369	2387	2712	4476	3969	3505	5862	5473	5964	2938	2872	2662	3314	3732	3011	6523	3330	7509	2436	2578	1716	4241	5050	5393	3284	6048	4535	2828	3901	1179
AFUA_1G07440	14108	15077	25987	32841	55326	35096	29187	17833	36756	8742	13031	16039	21365	31888	43422	12313	24553	34791	39924	28410	39543	46613	51772	56448	18662	61284	66082	41611	30589	24804	51146	38464	53462	21524	60880	67278
AFUA_1G07450	1802	1266	1531	3749	6644	3453	1606	1519	2629	604	375	272	4813	4892	4223	1934	2470	2155	1385	1019	1089	5136	3039	4500	3022	1713	1375	699	624	690	4174	4617	4360	1340	2480	986
AFUA_1G07470	14748	11167	13853	14980	18816	15734	32932	25606	26319	14149	10886	8638	15819	16439	16313	26531	26982	22919	11894	10015	11387	22251	19499	19090	26501	32876	17193	9948	10776	10668	29316	29105	17637	29793	32200	14240
AFUA_1G07480	536	337	554	11517	14218	12659	2082	1254	1865	191	258	257	12520	12424	12702	1208	1495	1670	942	602	842	20705	15426	11295	1302	1475	1532	441	300	382	31674	26111	21873	1720	2108	1135
AFUA_1G07490	1440	881	1158	1116	1481	1443	969	878	890	732	612	448	1190	1249	1172	727	919	768	693	344	542	1522	790	1488	851	687	674	637	829	934	749	803	1140	544	906	321
AFUA_1G07500	9033	9034	10507	532	846	1168	1916	1493	1124	9812	10926	10588	863	772	1178	1289	1248	869	7220	8172	7160	1196	771	1327	1386	1128	727	7004	9110	7188	1127	1236	1143	1846	1646	584
AFUA_1G07510	1807	1734	2231	1277	1308	711	1206	924	1179	1221	1399	1384	755	772	840	840	967	938	1025	947	888	653	421	737	802	937	847	952	1264	2032	545	755	801	402	1453	721
AFUA_1G07520	725	491	629	1380	1517	1153	1196	1163	1637	317	311	286	1997	1696	1209	1484	1436	1214	535	510	457	2182	1440	1610	1454	584	1482	485	441	608	1395	2005	1010	1105	1697	1170
AFUA_1G07530	1940	1602	2055	1989	2603	4599	2127	1809	2573	951	974	853	4867	3872	4176	1912	2310	2317	2041	1697	1769	6021	2886	5616	2536	2087	1379	1225	926	983	2400	3810	4255	1852	2793	878
AFUA_1G07540	1400	1204	1508	1835	1494	2615	2116	1701	1879	649	649	589	3259	2497	2426	1568	1591	1672	1802	1537	1637	4285	2370	3293	1825	1415	1369	747	751	823	2321	3284	2510	2015	1856	829
AFUA_1G07550	93	49	106	184	112	131	184	148	124	21	17	20	221	181	159	154	125	89	144	59	113	174	126	152	120	77	147	90	70	63	151	221	124	138	146	65
AFUA_1G07555	26	18	16	71	85	49	236	168	119	13	15	13	81	66	66	164	130	114	11	3	12	74	54	50	179	94	67	6	13	13	57	51	45	175	138	37
AFUA_1G07560	134	85	75	74	64	39	178	117	100	48	59	39	69	73	72	114	124	95	42	15	27	114	66	59	142	135	89	42	30	29	70	65	59	113	162	61
AFUA_1G07570	79	51	58	172	175	155	160	163	191	79	54	16	220	192	133	142	189	149	37	24	37	303	167	202	222	228	204	31	56	40	120	226	185	198	189	91
AFUA_1G07580	790	596	580	224	248	281	381	252	189	997	705	509	418	302	381	234	177	187	190	152	148	453	310	477	210	264	97	220	235	298	313	345	389	368	236	90
AFUA_1G07590	5390	4003	5724	1601	2146	1393	1308	1054	1234	3607	3208	2730	1551	1501	1427	1082	1237	884	2823	1842	2567	1918	1178	1656	1624	1011	809	3204	3497	4518	1034	1197	1181	841	1148	370
AFUA_1G07600	1165	653	932	404	457	445	454	396	358	801	571	330	722	471	407	451	312	269	804	664	752	696	339	552	467	294	174	564	480	576	261	587	358	355	298	75
AFUA_1G07610	3543	2438	2747	1460	1440	1061	1878	1634	1670	3455	2487	2054	1255	1179	1055	1429	1759	1132	2109	1817	1997	1574	1113	1275	2106	2369	1605	1785	1868	1839	1320	1663	848	1214	1986	657
AFUA_1G07620	438	428	432	380	449	286	414	321	194	363	404	278	397	344	288	266	219	120	472	439	428	553	343	377	219	278	172	251	301	338	356	487	269	294	302	96
AFUA_1G07625	1523	1366	1616	639	480	619	752	616	704	1069	1018	1064	770	568	470	623	574	446	1902	1832	1765	1004	648	615	823	590	713	1413	1418	1365	717	994	483	499	837	341
AFUA_1G07630	4174	3059	3776	4430	4880	2595	2691	2294	4430	2618	1903	1725	4816	4425	2493	2796	3626	2904	2023	1393	1607	4839	2719	3608	4878	5440	3409	1985	1872	1934	2014	3928	2568	1490	4639	1314
AFUA_1G07640	861	826	830	1053	1047	837	848	662	776	1374	1538	1620	964	885	909	674	663	545	514	496	460	1380	791	1140	999	824	762	492	620	464	696	989	875	753	851	334
AFUA_1G07650	3161	2082	2249	464	584	695	1139	814	490	3579	2930	1867	796	643	625	900	670	298	1405	1258	1336	886	492	718	723	606	487	1179	1290	1326	619	818	518	923	620	268
AFUA_1G07660	2253	1385	1615	605	769	576	1257	935	625	1589	1138	901	754	650	527	876	625	422	923	614	811	940	602	676	939	773	415	764	766	888	579	799	517	982	608	241
AFUA_1G07670	7098	6430	7655	1408	2196	1588	2718	2096	1897	6840	6669	5691	1561	1682	1668	1794	1845	1534	5305	3333	4806	2032	1345	1867	2314	1940	1715	5171	6649	6481	1467	1774	1468	1756	2088	979
AFUA_1G07680	2099	1521	2188	1011	1002	1105	1691	1246	1621	1467	1059	939	1340	1330	1160	1219	1283	1209	2664	2461	2489	1636	1112	1531	1370	1190	931	1604	1474	1345	1120	1535	1104	1146	1591	650
AFUA_1G07690	2005	1265	1207	3085	5599	1924	2562	1953	2344	2336	1680	1318	3058	2742	2070	2068	2114	1808	1049	1005	990	3380	2366	2670	2551	2008	2497	813	1005	974	2180	3428	2121	2590	2462	1723
AFUA_1G07700	1541	1066	1376	1631	2024	1799	7455	5447	3987	868	669	634	2095	2167	1891	4767	3694	3121	991	469	764	2975	2080	2226	4725	4548	3010	847	802	918	2310	2713	1668	4829	4139	2165
AFUA_1G07710	1647	1339	1587	943	1165	505	961	725	1128	1095	960	837	784	683	558	920	1036	664	1978	1391	1725	737	337	634	1402	1250	731	1137	930	985	368	667	451	605	1220	326
AFUA_1G07720	35847	26284	26538	3508	4100	4577	4850	3544	3476	41986	35369	22941	5017	4375	4441	3852	3684	2794	12839	9235	11876	6527	3865	5319	4848	3817	2751	15933	20118	20205	3593	4684	4049	3928	3807	1746
AFUA_1G07730	1748	1504	1957	827	1162	470	382	300	344	1065	1019	881	1025	1055	418	334	346	289	2475	2458	2261	1287	792	608	402	294	544	1732	1667	1692	605	1133	334	319	478	368
AFUA_1G07740	9748	7832	8268	1209	2834	1022	2165	1508	1300	10091	8564	5881	924	950	1124	1313	1354	912	5947	3473	5855	1118	708	1189	1686	1548	1516	5306	7137	6617	727	938	1054	1638	1436	821
AFUA_1G07750	5923	4321	5434	2418	2571	1918	7893	4550	3770	5226	4997	3608	1967	2484	2362	4210	3629	2904	6249	3718	5408	2497	2279	2646	4888	4269	4037	4429	4510	4036	3570	2826	2510	5621	3874	3778
AFUA_1G08760	4735	3641	4081	2027	2220	1897	2331	1798	2279	4553	3531	2467	2437	2227	1853	2097	2232	1751	2694	2524	2283	3022	1861	2428	2192	2065	1898	2111	2183	2382	2083	2743	1954	2134	2569	1278
AFUA_1G08765	2182	1503	2042	639	729	541	897	756	735	1399	1064	838	723	654	614	731	802	523	1195	886	1104	903	654	736	680	663	696	1305	1288	1336	740	805	532	775	772	481
AFUA_1G08770	1855	1402	1801	451	686	628	850	570	616	1159	1074	834	557	508	664	489	664	494	1315	357	1108	796	473	670	646	470	537	1104	1259	1431	523	430	621	383	527	402
AFUA_1G08790	10014	7590	8955	2377	2847	4317	4854	3778	3000	8199	7347	5691	4055	3196	3981	3395	2932	2375	4827	2677	4709	5427	3085	4135	2971	3377	1828	6192	7419	7981	3359	3823	3747	3034	3278	1394
AFUA_1G08795	4576	3334	3476	1582	1809	1265	2157	1623	1466	3823	3384	2104	1619	1597	1446	1579	1477	966	1935	1530	1804	2025	1242	1639	2226	1504	876	1922	2143	2441	1138	1500	1326	2025	1743	628
AFUA_1G08800	491	272	348	436	490	279	794	612	512	209	126	69	306	299	271	582	500	397	441	189	367	450	247	357	622	477	537	151	115	166	274	271	289	538	526	377
AFUA_1G08810	2447	2078	3409	4565	6225	2985	3041	2435	3061	1214	980	846	3727	4532	3170	2163	2575	2864	1204	853	1135	4841	3567	4416	2647	3249	4648	1425	1421	1701	1997	3261	3171	1966	3979	2449
AFUA_1G08812	17	11	42	12	3	4	26	17	21	6	4	6	8	3	2	42	19	5	7	25	9	5	4	13	29	31	11	16	11	11	2	8	3	15	28	3
AFUA_1G08814	0	0	0	1	0	0	0	0	0	0	0	0	0	6	1	0	0	0	0	0	0	0	0	0	2	2	0	0	0	0	0	2	0	0	0	0
AFUA_1G08816	0	0	0	0	1	3	0	0	0	0	0	0	1	0	0	2	0	0	0	0	0	0	1	0	0	0	0	0	0	0	0	0	0	0	0	0
AFUA_1G08818	0	0	0	0	0	0	0	0	0	0	0	0	0	0	2	0	0	0	0	0	0	0	0	0	0	0	0	0	0	0	0	0	0	0	0	0
AFUA_1G08822	1	0	5	1	3	0	2	3	0	1	0	1	0	1	0	0	1	0	0	0	0	2	0	5	0	0	0	0	2	0	0	3	0	0	0	0
AFUA_1G08820	2747	1992	2116	946	1311	941	729	591	441	2584	2315	1650	1069	913	878	504	511	283	1031	1177	859	1071	757	1200	569	485	445	1154	1397	1398	862	930	974	751	701	265
AFUA_1G08830	5553	3466	4445	1785	2715	1584	1657	1250	1730	3430	2553	1713	1739	1648	1486	1231	1478	1235	1952	1318	1640	1931	1370	1870	1547	1120	1673	2260	3008	3417	1744	1819	1717	1080	1610	1194
AFUA_1G08840	7022	4507	4654	1772	2156	3168	1753	1749	1673	6503	4705	3217	3566	2744	2936	1835	1832	1520	1612	1491	1412	3975	2504	3753	1429	1406	1314	2567	3162	3880	2688	3656	2777	1747	2082	1187
AFUA_1G08850	391	284	380	3762	3316	5423	3851	3192	3730	180	110	98	5542	5113	5382	3053	3254	3012	537	240	535	6767	3714	6324	3091	2634	2309	251	271	249	3272	4324	5026	3343	3700	1509
AFUA_1G08860	227	172	172	383	395	571	368	276	214	99	84	86	695	545	518	308	259	243	189	186	178	699	363	585	223	244	162	112	107	140	384	668	473	275	319	133
AFUA_1G08870	3335	2400	2942	1211	1314	1141	1740	1263	1520	2227	1991	1669	1300	1104	1195	1441	1468	1152	2789	1905	2219	1769	970	1416	1665	1480	1267	2091	1954	2245	915	1127	990	1007	1535	618
AFUA_1G08880	1932	1386	1499	1572	1661	3927	3681	3731	3309	2094	1428	1027	4467	3531	3607	4410	4061	3385	1338	1137	1300	4815	2913	4986	3149	2692	1591	987	859	1075	3340	4264	3313	3674	4502	1682
AFUA_1G08890	3069	2281	2249	415	515	419	887	631	396	3643	3107	2008	527	501	538	575	378	266	662	569	587	520	432	519	413	448	430	940	1138	1245	607	550	481	668	557	224
AFUA_1G08900	3350	2634	3885	1077	1548	1612	1826	1327	1448	1734	1907	1608	1398	1402	1549	1099	1389	1314	3813	2572	3599	2439	1780	1935	1495	1292	1061	3114	3307	2926	1683	1684	1656	1257	1656	818
AFUA_1G08910	1453	915	1044	643	743	511	945	670	560	688	604	481	658	563	473	616	526	348	906	524	747	803	529	639	696	573	574	788	744	706	502	608	428	787	593	252
AFUA_1G08920	1263	1311	1750	1846	2659	2014	3831	4424	4666	845	1004	1302	1832	2269	1957	3468	4030	3846	1908	1492	1891	2993	2092	2123	4598	4289	6450	1950	2039	1256	2124	2414	1491	2510	6116	3996
AFUA_1G08930	355	292	501	647	753	1565	1142	973	1180	275	353	419	1474	1205	1467	1211	1242	921	928	822	750	2040	1173	1980	1114	816	769	676	522	489	1100	1385	1450	879	1278	544
AFUA_1G08940	1172	1140	1379	1565	1674	1344	1652	1442	2186	793	860	878	1740	1419	1362	1419	1811	1859	1203	1227	1077	1669	986	1593	1640	992	1543	977	1028	1035	1056	1517	1074	1152	1794	1130
AFUA_1G08950	608	431	522	302	429	355	267	253	205	330	269	265	451	383	328	295	187	144	442	511	378	486	329	438	224	260	196	250	235	273	266	382	329	263	331	91
AFUA_1G08960	2042	1818	2163	1880	2206	2497	3562	2550	2779	1248	1178	1331	2729	2491	2487	2571	2518	2348	2673	1651	2283	3108	1895	2967	2495	3130	2266	1637	1346	1129	1871	2250	2237	2521	3217	1789
AFUA_1G08970	2555	2143	3212	766	1012	572	1014	754	1180	1553	1672	1664	576	543	613	827	1111	938	3174	1563	2952	716	330	701	1385	1222	798	3358	3690	2934	326	504	462	399	1039	598
AFUA_1G08980	1744	1334	1815	1325	1044	1363	1055	997	1572	1216	997	903	2094	1793	1702	1333	1337	1623	2317	1932	2166	2360	1328	1966	1469	916	1013	1667	1360	1018	1408	2122	1543	1153	1747	764
AFUA_1G08990	1055	626	866	581	571	302	687	488	455	629	516	441	550	512	367	545	392	341	588	462	501	518	382	408	577	414	571	468	499	653	370	471	313	513	645	270
AFUA_1G09000	549	321	512	415	385	402	586	533	743	268	218	199	458	425	417	572	586	693	504	218	562	462	339	358	790	440	676	457	424	310	278	357	313	426	680	453
AFUA_1G09010	2019	1479	2193	1946	1792	4935	4157	3898	3790	982	1178	1113	4943	3923	4806	4355	3779	3059	3824	3121	3123	6783	3383	5801	3699	3257	1955	1913	1652	1471	3418	4530	4290	3382	4216	1781
AFUA_1G09020	2130	1540	2046	1203	1106	1803	1129	999	1314	1054	955	658	1710	1679	1904	1014	1220	1266	3211	2069	3268	2755	1586	2234	1129	1012	986	1650	1437	1474	1460	1713	1910	955	1492	748
AFUA_1G09030	26852	16141	20570	2878	4045	9398	29397	22440	17096	23324	17375	12949	5071	4397	10815	24352	19372	14972	26867	19017	24780	11993	10143	9813	19777	16808	9901	21600	20908	18028	26768	20120	16111	28848	20745	9159
AFUA_1G09040	4894	3539	4710	1394	1739	1216	1132	963	1009	2682	2666	2044	1525	1417	1226	882	881	797	2909	2205	2940	2179	1500	1489	931	638	794	4195	4666	4646	1696	1955	1290	893	987	518
AFUA_1G09050	1465	1115	1410	1090	1214	1509	423	338	571	588	577	563	1581	1423	1466	372	470	570	801	690	712	1886	1283	1766	392	321	844	848	1050	1213	1287	1703	1418	383	838	874
AFUA_1G09060	10704	7532	10406	1251	1674	1045	2115	1598	1749	7777	8026	6902	1072	1145	1010	1572	1678	1212	8255	8529	8217	1264	926	1422	1836	1293	1844	10731	11893	13202	1075	1119	935	1199	1762	1057
AFUA_1G09070	1376	988	1342	945	834	1456	1077	836	866	622	614	381	1621	1324	1436	943	857	636	793	524	757	1970	987	1642	974	619	579	772	741	1084	936	1256	1090	780	640	392
AFUA_1G09080	921	644	925	3018	3433	1432	1553	1498	2006	438	464	353	2205	2432	1437	1748	1775	1343	624	379	572	1882	962	1262	1859	1182	1518	640	712	716	885	1271	871	583	1755	631
AFUA_1G09090	1382	1139	1696	593	544	542	435	512	664	622	757	638	643	629	565	451	684	552	1194	1539	987	620	454	619	579	367	755	1394	1576	1767	452	691	417	545	623	421
AFUA_1G09100	10581	9854	11027	11695	10410	16915	4664	4404	6790	10760	9636	10649	22321	18065	16968	4362	6073	7119	14043	13166	11089	25436	13328	23444	4884	4788	4063	6710	6048	4441	10547	19521	19418	5986	9474	3071
AFUA_1G09110	1274	858	1252	389	490	430	495	423	493	795	635	430	387	400	408	522	486	319	473	321	400	465	336	346	461	320	464	671	828	887	526	459	389	364	496	284
AFUA_1G09120	181	70	91	186	246	89	190	200	187	60	62	46	286	231	169	195	172	105	57	66	50	182	109	120	226	140	153	42	58	64	128	172	107	173	162	52
AFUA_1G09130	853	541	742	1463	1485	1318	964	715	759	377	302	233	1044	1013	1311	667	664	602	577	430	619	1463	728	1372	570	500	950	932	980	762	800	1061	1161	760	740	1133
AFUA_1G09140	1015	933	1262	885	771	743	2346	1608	1217	498	500	399	651	648	782	1179	1135	760	1161	868	970	999	737	1034	1337	1786	733	927	988	1150	1005	1045	827	1522	1073	628
AFUA_1G09150	1228	807	995	811	907	1014	813	722	878	443	319	251	935	875	985	600	818	631	1119	752	802	1242	668	1182	789	501	626	613	547	793	735	969	983	548	724	403
AFUA_1G09160	388	330	330	378	276	379	410	329	425	175	220	242	510	409	364	356	433	291	993	654	849	499	337	399	464	193	277	466	303	257	332	463	275	157	353	212
AFUA_1G09170	824	409	551	1112	1340	1458	1566	1386	1483	360	277	224	2028	1568	1608	1492	1530	1287	825	426	719	1688	912	1738	1689	850	990	457	325	394	972	1477	1252	1137	1432	582
AFUA_1G09180	1185	929	1321	787	741	1167	875	632	824	584	537	571	1367	1211	1245	620	708	771	1470	1353	1418	2240	1212	1603	754	456	566	837	573	799	1159	1457	1307	687	759	359
AFUA_1G09190	5046	3477	3540	911	1087	703	1155	947	996	5798	4986	3475	947	949	725	1087	931	831	3049	2357	2877	915	648	806	1178	676	1146	2371	2655	2600	824	1145	657	938	1117	588
AFUA_1G09200	626	839	1251	1031	1037	1119	725	709	2252	273	172	280	1040	1124	1395	963	1908	1858	1426	658	1365	1416	717	1580	1814	2321	1825	655	528	457	500	914	1130	485	2262	1083
AFUA_1G09210	1697	1378	2195	947	942	629	846	806	1545	1245	1346	1329	1036	890	1001	1020	1448	1179	2037	1643	1899	1444	668	1305	1825	1239	1065	1442	1182	1266	491	831	874	626	1508	611
AFUA_1G09220	2133	1749	2611	557	636	741	880	756	1096	1362	1333	1032	687	698	678	847	1024	746	1604	1369	1432	975	559	888	1138	881	831	1642	1936	1934	587	828	639	798	991	375
AFUA_1G09230	575	386	483	333	355	420	334	313	338	312	210	176	582	517	420	380	344	311	289	301	327	440	248	475	259	198	367	294	360	394	298	466	384	258	538	207
AFUA_1G09240	7217	5537	5742	612	840	680	1022	701	505	7673	7472	5333	645	542	571	568	531	333	3303	2659	3164	1007	581	673	602	483	487	3900	4660	4973	691	818	596	638	602	265
AFUA_1G09250	2590	1497	2295	1826	2322	1648	3808	2572	1861	1152	888	634	2480	2179	2050	2278	1601	1667	1721	1473	1719	2948	2251	2177	1736	1529	1643	1639	1545	1962	3106	3226	2210	3205	2156	1317
AFUA_1G09260	28	22	76	48	63	28	46	40	25	32	25	36	36	31	43	24	42	48	47	27	26	55	31	42	43	24	29	18	37	13	17	37	30	20	61	17
AFUA_1G09270	817	939	1007	1090	964	1020	700	892	1535	1109	1171	992	1530	1469	1085	1113	1538	1632	533	586	525	1970	1037	1019	1588	949	1067	583	770	704	895	1593	628	632	1720	579
AFUA_1G09280	7545	6192	7852	4219	4001	3888	4343	3722	5057	7034	5700	5163	5343	4677	4485	3757	4094	4026	3535	2028	3342	6406	4059	4696	4805	3661	3933	4648	5773	5295	4117	4508	4091	3270	4845	2859
AFUA_1G09290	1140	1040	1293	1293	1904	1697	1237	876	1539	753	816	738	1516	1489	1682	819	1086	1155	1089	864	1007	2035	1191	2097	1270	1293	1424	966	798	943	1051	1341	1977	858	1408	975
AFUA_1G09300	15	2	17	43	97	85	83	78	254	0	2	3	161	152	136	93	105	295	34	13	43	193	159	195	99	35	245	14	5	26	66	74	171	187	307	106
AFUA_1G09310	110	57	57	440	591	551	1428	1242	1147	60	48	30	573	596	669	1416	1235	961	40	21	38	632	331	978	1542	983	986	41	30	34	292	496	668	1195	1374	633
AFUA_1G09320	523	427	527	780	683	689	1154	1117	1922	160	144	127	809	770	934	1301	1759	1456	799	380	601	889	473	1024	1997	1612	1130	446	385	484	423	647	735	1156	2103	975
AFUA_1G09330	810	812	1182	2426	2113	2838	1376	1314	2291	332	298	438	3467	3248	2768	1457	1977	2247	1292	921	1084	4326	2396	3791	1848	1496	1844	822	578	570	1820	2715	2797	1030	2225	1052
AFUA_1G09340	14	10	26	50	69	40	50	44	45	5	3	2	35	38	39	57	29	33	14	14	20	54	31	37	69	24	15	8	7	12	11	52	37	32	46	24
AFUA_1G09343	4	15	9	24	53	18	33	22	13	6	4	7	13	20	12	18	17	10	3	5	5	12	2	19	26	22	7	3	18	6	5	15	3	7	22	4
AFUA_1G09346	1	0	0	8	8	1	1	1	12	0	0	0	3	8	0	2	2	4	0	0	0	0	0	2	0	3	0	0	0	0	0	1	1	0	1	0
AFUA_1G09349	0	0	0	0	0	0	0	7	0	0	0	0	0	0	0	1	0	0	1	2	0	0	0	0	1	1	0	0	0	0	0	0	0	0	4	0
AFUA_1G09350	755	733	1008	675	759	1018	2022	1577	1687	333	278	293	1542	1116	925	1768	1608	1336	1698	1189	1459	1564	847	1467	1990	1039	838	743	563	598	849	1317	814	1515	1358	678
AFUA_1G09360	1191	691	1070	727	986	897	1020	833	767	660	403	349	950	802	846	883	859	534	1718	1189	1287	871	590	941	768	660	447	943	721	970	828	1140	783	949	929	316
AFUA_1G09370	312	442	685	687	737	738	584	564	1343	122	132	119	682	693	865	661	1098	1076	1042	541	976	675	379	1018	1036	1009	972	395	245	263	294	505	627	305	1327	711
AFUA_1G09380	481	536	725	819	744	819	866	689	1119	230	267	342	718	723	786	849	925	928	1555	1651	1529	623	346	810	941	815	638	1015	666	589	363	638	569	545	992	555
AFUA_1G09390	962	593	819	894	947	798	600	481	696	460	422	430	904	911	738	503	778	542	1630	1586	1538	1135	792	1050	660	576	465	1046	934	715	707	1040	719	609	714	280
AFUA_1G09400	4036	2402	3667	1997	1759	1277	1864	1749	2509	2505	1794	1359	1477	1392	1566	1899	2511	1822	1381	807	1317	1969	1094	1468	2701	1977	1807	2054	2254	2731	1216	1472	1326	1175	2559	997
AFUA_1G09410	1426	1094	1536	1455	1440	1624	1004	838	1497	487	343	282	2017	1943	1595	988	1156	1377	1523	1079	1420	2634	1757	2183	1201	1081	1323	599	546	685	1531	2108	1814	895	1646	859
AFUA_1G09420	213	222	147	569	761	577	489	431	403	127	109	82	628	588	551	480	443	312	204	137	183	692	501	680	441	355	323	79	61	48	727	929	581	512	400	179
AFUA_1G09430	218	169	277	238	203	264	268	190	218	158	108	120	419	392	211	267	250	174	438	313	433	431	223	241	241	95	123	203	192	190	190	384	155	95	244	59
AFUA_1G09440	6954	7127	8849	13987	12738	21349	6487	6334	9989	6306	6106	6941	27702	21347	18975	6298	8748	10446	11251	10378	9533	29802	18180	28433	7014	7208	6358	5677	4326	3179	13082	25190	21850	7676	12221	5059
AFUA_1G09450	1022	768	1113	1935	1950	1038	1281	1069	1779	495	319	266	1689	1797	1219	1277	1358	1349	773	496	732	1632	1232	1587	1329	842	1818	520	347	501	1088	1415	1249	743	1542	984
AFUA_1G09460	1003	662	965	918	1015	865	1474	1116	957	587	488	411	1118	979	855	922	816	770	975	616	826	1228	809	1096	1067	898	935	476	416	532	856	935	849	1204	965	457
AFUA_1G09470	896	453	835	2478	2340	2536	3395	3345	4384	302	224	192	2836	2503	2645	4380	3993	4464	836	554	668	3553	3205	3331	4192	2193	4486	417	330	495	3918	3221	2736	2902	5626	3152
AFUA_1G09480	1142	672	936	1402	1537	1481	796	712	864	560	383	309	1666	1475	1405	688	716	708	635	470	571	1475	1096	1701	737	489	849	387	360	539	1323	1497	1344	697	972	686
AFUA_1G09490	6022	4308	5691	1675	1899	2552	2238	1915	1995	4860	4524	4269	2596	2259	2505	1777	2134	1943	4726	4315	4362	3496	2001	3236	2150	1784	1451	3966	4053	4350	1897	2614	2318	1915	2566	916
AFUA_1G09500	4046	2960	3520	4581	4639	3171	4103	3704	4720	2676	2124	1746	2401	2448	3633	3591	4191	3526	3318	1527	2856	3429	2345	3840	3942	2814	5323	2345	2097	2477	2299	2627	2774	2436	4319	3499
AFUA_1G09510	63	77	66	4913	5381	9322	4790	3791	4245	57	44	38	8766	8839	9790	3625	3623	4583	48	18	21	11525	7964	12870	2502	3459	3147	49	44	53	9520	11455	11392	6468	6005	2612
AFUA_1G09520	166	112	122	372	330	526	250	242	197	63	48	50	888	625	529	301	221	208	130	78	82	809	379	658	252	174	124	101	81	106	375	693	355	227	243	80
AFUA_1G09530	475	420	658	1516	1812	1370	1886	1417	1782	319	279	308	1328	1439	1362	1445	1500	1300	714	507	719	1527	939	1699	1906	1082	1655	648	597	572	849	1087	1135	1285	1301	1140
AFUA_1G09540	1878	1741	2236	695	705	1057	490	441	534	1020	1202	1422	1153	1001	1158	396	370	503	2083	1795	2119	1349	842	1376	342	402	351	2217	2081	1299	920	1071	1061	471	593	413
AFUA_1G09550	3927	2570	2892	1134	1076	1625	504	476	567	3064	2611	1672	1783	1526	1583	440	500	604	1265	1552	1127	1911	1105	1990	474	394	341	1522	1859	1998	1209	1828	1538	604	766	314
AFUA_1G09560	386	208	342	672	694	716	748	600	675	218	165	167	874	843	663	683	685	532	438	265	472	1033	670	766	709	469	783	303	223	314	754	1021	663	568	694	471
AFUA_1G09570	1418	925	1072	920	1125	551	748	714	1272	1117	1012	780	724	633	604	942	1135	861	609	436	512	633	412	607	1413	759	1251	627	784	842	405	660	473	518	1295	901
AFUA_1G09580	1046	804	1122	7215	8274	7236	5181	8005	10101	369	329	242	2231	3705	10185	6576	9287	10371	715	335	604	2914	1997	9093	3945	3733	13607	782	801	924	1562	2643	5757	2400	11793	9338
AFUA_1G09590	1856	1040	1788	10099	13118	9752	8047	11385	18868	792	577	486	3601	5596	12408	10454	16605	18082	1019	639	841	4664	2974	11682	9236	8001	22556	1276	1304	1951	2465	3657	7509	3706	20984	14808
AFUA_1G09600	872	583	642	1264	1655	2092	1065	939	900	381	291	274	2462	2194	2163	815	834	786	853	853	717	3073	1922	2728	606	618	591	396	348	429	1881	2616	2157	1004	1081	620
AFUA_1G09610	3455	2246	3414	1924	1983	1959	3703	2784	3112	3109	3231	2484	1716	1773	1921	2889	2705	2521	2974	2234	3120	2379	1668	2124	2756	1762	2518	3015	3119	3149	1973	1768	1982	2045	3100	1718
AFUA_1G09620	4284	2597	3722	1292	1186	1038	1905	1376	1207	2318	1717	1291	1156	1081	932	1545	1378	866	2606	1669	2437	1293	834	1229	1448	1122	905	2571	2669	3220	840	1176	888	1007	1294	517
AFUA_1G09630	2164	1520	2388	2239	2483	2763	2886	2212	2489	1238	1211	1145	2698	2253	2881	2077	2161	2002	1694	664	1619	3495	1931	2786	2299	1938	1868	1834	2172	2410	1985	1994	2489	1510	2269	1298
AFUA_1G09640	657	446	626	1589	1826	1675	2302	2113	2044	237	218	217	1820	1641	1663	1997	1933	1529	305	215	304	1848	993	1876	1900	1519	1597	277	324	379	982	1286	1342	1252	2113	1024
AFUA_1G09650	2079	1215	1610	523	645	517	470	434	413	1071	1012	701	640	536	474	516	445	346	977	1030	988	803	520	691	453	364	322	772	968	1409	380	563	487	441	619	189
AFUA_1G09660	2107	1218	1925	1507	1574	2761	1256	1169	2010	655	708	490	3097	2662	2530	1329	1585	1713	1103	1097	983	4079	2172	3277	1395	882	1367	1140	1312	2115	2105	3106	2914	1403	1899	1112
AFUA_1G09670	2121	1660	2425	3790	4331	2638	19183	16141	10392	1225	1260	1307	3354	3689	2920	18430	12066	9343	2349	1146	2246	4672	2903	2839	16229	11359	5334	1767	1820	1793	3448	3965	2305	10675	10899	3193
AFUA_1G09680	24188	15935	15888	1281	1931	1095	3632	3273	2767	24282	20155	11420	1440	1304	1287	3019	3155	2296	6058	4425	5178	1829	1368	1360	2964	2892	4161	9094	12010	12343	2128	2515	1119	3688	4845	2122
AFUA_1G09690	258	285	299	1175	1328	666	2900	2286	1364	248	261	327	1082	1175	817	2729	1617	1188	492	452	385	1242	792	768	2182	1745	611	358	382	299	921	1294	622	2518	1627	480
AFUA_1G09700	740	704	854	1008	1357	819	827	759	1128	458	421	363	1242	1326	752	760	979	957	1105	773	863	1263	785	1026	961	793	1120	534	502	465	649	1080	741	527	1178	696
AFUA_1G09710	202	206	204	102	182	130	180	164	113	163	129	174	164	156	121	132	112	91	327	468	278	166	105	178	108	156	101	139	113	102	71	165	101	140	182	46
AFUA_1G09720	460	351	445	558	674	444	470	419	399	209	187	177	424	448	495	408	394	344	539	271	585	602	374	514	270	274	380	279	237	280	402	401	350	294	468	219
AFUA_1G09730	1428	1028	1234	3532	3281	2185	3091	2958	3345	666	605	590	1509	1766	2471	2920	3640	2614	1064	984	992	1514	932	2550	2503	2511	2412	924	885	975	1199	1453	1905	1917	3984	1238
AFUA_1G09750	7659	7538	9951	2894	3365	1505	2207	2055	2188	9233	9829	11261	1033	1492	1627	1924	2236	1852	8150	13436	7922	1326	869	2113	1956	1139	2723	9739	12043	9690	992	1307	1470	1720	3362	1081
AFUA_1G09754	1321	1289	1205	705	766	968	807	760	1082	1453	1427	1345	1067	1182	732	872	982	979	1661	1949	1378	1271	737	888	671	513	868	954	1361	1098	879	1236	675	748	1269	853
AFUA_1G09757	3370	2310	2922	934	1369	628	567	455	678	2438	1844	1343	653	764	555	469	618	400	1742	2068	1504	634	491	731	566	357	478	1745	1839	2301	623	721	567	324	673	377
AFUA_1G09760	497	260	297	491	506	522	667	545	599	302	262	185	606	612	556	700	598	431	459	301	438	741	474	611	698	341	362	253	226	214	530	739	454	703	565	242
AFUA_1G09770	1924	1411	1967	2010	2292	1744	1481	1137	2536	1240	976	1036	1325	1428	1674	1349	2193	2009	1132	381	1105	2120	1194	2050	2554	2053	1727	1205	1248	1239	705	849	1441	585	2069	1038
AFUA_1G09780	1187	995	1353	840	815	1543	920	736	1099	526	562	752	1466	1427	1418	607	817	849	1536	1105	1415	1899	1134	1906	870	594	802	1018	1000	912	1154	1335	1559	763	984	542
AFUA_1G09790	830	622	1025	884	1313	868	1024	803	987	289	261	273	942	829	848	957	969	708	658	470	616	1023	551	968	1289	654	772	684	645	819	467	696	692	751	765	502
AFUA_1G09800	1931	1532	2028	6561	6429	4624	3342	3135	5155	1282	817	941	6742	5848	5409	3836	4639	4677	1590	1277	1366	7509	4653	6720	4016	4388	5973	996	826	980	3550	5252	4570	3000	6326	3145
AFUA_1G09810	2803	1863	2324	1401	1772	2111	1887	1706	1628	2196	1717	1025	2225	2113	2191	1920	1993	1382	2234	1952	1862	2655	1989	2886	1514	1863	1242	1753	1698	1832	2411	2796	2236	2101	2276	1345
AFUA_1G09820	857	672	924	643	836	888	701	526	524	302	309	267	1024	856	778	516	512	480	1259	590	1171	1351	677	957	529	317	367	742	746	864	735	930	704	558	476	222
AFUA_1G09830	1239	651	1126	2514	2079	3339	3836	3250	3858	557	369	359	4099	3394	3705	3831	3381	3346	1467	1083	1336	4931	3227	4176	3445	2498	3164	568	388	674	3717	4704	3666	3466	4210	3113
AFUA_1G09840	847	998	1357	1523	1564	1413	908	1035	2527	276	359	367	1396	1354	1413	1173	2087	2432	1665	626	1427	1967	922	1795	2073	2212	1967	785	643	628	604	875	1267	597	2393	1293
AFUA_1G09850	101	194	280	1025	882	917	550	540	1165	44	69	39	1041	937	933	628	943	1105	494	354	427	1345	765	1352	871	967	1121	161	103	64	604	892	887	412	1289	668
AFUA_1G09870	931	807	999	543	551	901	955	739	720	545	388	275	819	630	933	684	689	563	1071	539	1054	1419	821	970	790	601	534	784	657	751	905	811	845	723	751	361
AFUA_1G09880	674	572	669	856	1126	786	833	991	1028	535	675	467	614	734	979	735	1006	853	980	1147	1010	921	862	1143	752	1187	1210	860	954	654	1011	1075	750	768	1906	848
AFUA_1G09890	4845	3743	5157	8496	11869	7260	10666	12900	23993	2677	2197	2401	11821	13477	7288	11161	22472	20419	5305	6748	4811	14962	12328	9771	18232	13600	20621	5657	6519	5471	18351	26550	7375	20163	32231	15558
AFUA_1G09900	1137	771	1058	896	1481	920	958	949	1088	421	398	313	648	681	1337	1005	1097	719	601	544	560	644	479	1448	947	1085	1649	700	796	1219	451	610	824	644	2015	708
AFUA_1G09910	574	397	557	361	374	317	410	351	392	244	176	122	372	290	458	445	361	292	473	355	370	444	348	399	500	603	308	378	385	418	369	477	317	357	563	128
AFUA_1G09920	400	299	334	390	375	493	384	325	272	186	149	113	576	492	470	276	322	234	692	448	636	713	388	536	252	230	199	347	281	313	367	480	467	345	342	152
AFUA_1G09930	2393	1551	2328	1096	1083	1267	502	536	681	1331	1181	952	1624	1285	1270	604	762	737	1349	1348	1193	2126	1266	1456	475	364	655	1514	1764	2182	1474	1944	1018	514	814	517
AFUA_1G09940	9888	10627	16689	7596	6549	8484	11886	10199	13924	5892	7873	11710	6525	6877	9435	9873	12457	11481	20706	16485	19014	10333	8227	9142	10839	9672	10541	19593	15619	11221	11302	10280	8926	8566	13078	9158
AFUA_1G09950	6593	4002	4683	1644	2113	1786	2428	1943	2008	5369	3673	2501	1972	1888	1652	2083	2081	1548	3934	2988	3639	1890	1241	1894	2301	1443	1542	3502	3370	4229	1474	2136	1472	1788	2180	912
AFUA_1G09960	666	524	471	419	553	520	566	416	310	1023	980	571	606	511	535	519	330	291	675	537	481	648	456	649	310	247	382	313	351	382	489	644	505	551	421	249
AFUA_1G09970	3273	2395	3421	3510	3058	3272	2055	1670	3026	2210	1732	1559	4384	4061	3501	1886	2417	2876	2306	1380	1952	4651	2732	4094	2442	1997	2772	1781	1729	1686	2088	3555	3315	1425	3292	1696
AFUA_1G09980	2078	1520	2069	284	484	288	178	334	624	997	1231	1103	354	425	359	299	731	525	1202	1575	942	554	379	323	545	149	885	1608	2206	2809	548	761	244	392	920	511
AFUA_1G10012	1272	803	1218	1951	1985	3106	3676	2930	2163	721	679	625	2771	2575	3548	2914	2292	1850	892	718	876	3940	2574	4339	2719	1542	1714	919	982	1185	2645	2238	3234	2395	2378	682
AFUA_1G10020	18	9	8	266	462	434	248	168	158	5	6	2	429	453	427	125	122	121	8	15	15	562	331	544	172	141	196	9	9	7	374	386	434	300	236	84
AFUA_1G10030	136	76	95	470	521	373	332	288	277	76	78	47	487	465	309	306	310	193	99	77	50	420	250	310	292	210	248	56	70	66	369	442	258	216	340	116
AFUA_1G10040	5716	3620	4413	2993	3858	3595	2299	2051	2574	4835	3504	2427	3626	3770	3447	1783	2516	2599	2716	2103	2648	4727	3123	3837	2092	1896	2031	2712	2792	2989	3203	4007	3277	2109	2714	1753
AFUA_1G10050	15017	11966	14464	3259	3290	2954	3933	2822	3292	13675	13593	11398	3123	3041	3184	2806	3114	2399	9032	6638	8317	4342	2742	3366	3428	2932	2750	11173	12565	13913	3260	3092	2958	2633	3313	1718
AFUA_1G10060	1059	569	854	398	449	433	944	764	690	490	379	250	589	610	433	974	833	550	813	698	633	460	325	584	837	542	427	549	466	863	458	547	382	650	781	291
AFUA_1G10080	3666	2398	3326	1495	2159	985	1278	1029	1641	2547	2305	1734	1503	1702	1029	1139	1253	966	1736	1800	1629	1576	989	1189	1689	678	1227	2229	2566	2634	1253	1583	903	840	1436	1049
AFUA_1G10090	4887	3085	4076	615	884	770	371	417	621	4242	4271	3463	903	925	936	447	578	629	2017	2190	1793	1229	981	1041	482	314	657	2875	3416	3723	1426	1681	1067	540	627	670
AFUA_1G10100	709	458	631	312	304	418	1414	1072	590	364	497	563	546	565	384	1250	776	584	998	1020	848	803	732	530	957	1009	395	757	605	640	1046	1080	445	1163	774	377
AFUA_1G10110	337	226	291	493	554	860	941	1094	1188	161	188	117	1368	1117	831	1345	1298	1025	147	138	132	1695	1105	1147	1226	636	1098	131	131	226	1268	2068	654	1373	1381	640
AFUA_1G10120	57	20	19	85	125	194	232	245	370	18	16	21	246	218	172	271	360	347	48	41	31	403	176	258	270	150	279	15	24	28	228	361	135	302	320	189
AFUA_1G10130	1708	1367	2004	16660	19469	15870	7016	6643	15909	741	553	406	21528	20709	14311	9215	13719	14555	1005	578	846	24797	15398	19481	11722	8162	22610	889	800	943	11430	15500	13498	4911	16233	18236
AFUA_1G10140	336	210	262	1127	1461	499	2496	2493	1840	233	98	115	1581	1540	561	3156	2453	1308	210	188	140	1430	894	544	2173	1068	1097	157	166	213	859	1294	326	2838	2094	680
AFUA_1G10150	105	43	67	1136	1022	626	4370	3680	4761	84	42	56	2052	1715	289	5949	4824	4553	65	95	61	1816	893	417	3595	756	2986	43	35	35	1020	1442	418	4272	2458	9635
AFUA_1G10160	6	4	1	431	482	74	222	151	154	12	4	5	138	191	33	271	145	146	7	1	0	97	65	38	116	38	213	7	2	2	53	103	50	126	121	227
AFUA_1G10170	13	7	8	453	423	156	286	271	229	12	8	11	425	329	124	384	272	162	7	4	4	440	211	209	283	129	220	1	5	6	202	394	95	364	351	92
AFUA_1G10180	55	32	29	37	65	33	36	28	17	17	6	11	75	32	32	17	18	18	15	13	18	51	41	39	30	33	17	14	23	18	37	38	39	56	23	11
AFUA_1G10190	1196	1243	2228	1198	1075	1407	1886	1645	2197	687	1014	1270	1161	1071	1269	1841	2105	1621	3389	3232	3245	1329	747	1693	1895	1729	1528	2859	2153	1877	790	1057	1185	909	1903	777
AFUA_1G10200	1861	1501	2618	1259	1090	1695	1474	1226	1679	589	623	648	1538	1387	1576	1232	1688	1402	2488	2170	2151	2183	1321	2168	1902	1198	1324	2104	1902	2530	1238	1633	1516	956	1545	705
AFUA_1G10210	52	30	58	816	1181	738	848	614	834	25	13	10	1136	1096	723	854	686	504	64	25	65	1518	1002	1149	1167	375	919	23	27	38	944	1186	857	1011	672	529
AFUA_1G10220	168	128	194	10313	16012	10930	10556	17863	23804	111	84	70	8491	9509	14038	14085	24662	23391	107	71	107	10133	8440	13149	12846	8551	33443	198	217	326	10254	12414	9230	11093	32612	15413
AFUA_1G10230	4	2	1	300	294	206	251	218	215	2	1	2	181	154	163	195	250	125	1	0	0	180	87	220	217	239	201	5	1	9	132	158	155	106	260	161
AFUA_1G10240	4	0	0	51	53	87	73	46	62	0	0	0	35	41	68	32	39	27	1	0	0	48	32	58	55	55	37	0	2	0	22	32	20	15	40	24
AFUA_1G10250	0	1	1	65	105	34	0	5	0	2	4	0	45	50	18	4	4	0	0	1	0	58	36	24	8	7	1	2	0	1	25	34	26	2	2	2
AFUA_1G10260	26	7	10	1816	2021	887	43	47	80	4	1	3	1937	2256	528	53	99	182	23	14	9	1864	974	663	21	6	125	12	7	9	983	1499	378	10	117	99
AFUA_1G10270	283	276	303	524	412	723	713	647	1520	89	117	83	711	779	633	802	1272	1667	324	399	334	868	540	702	846	474	1938	226	200	210	601	889	546	581	1777	955
AFUA_1G10280	507	418	600	1135	1109	878	922	720	917	138	183	125	1083	1114	972	714	841	758	1104	755	961	1138	731	1165	682	651	1117	423	344	406	724	988	910	629	949	688
AFUA_1G10290	2029	1667	2245	1325	1750	1940	1891	1303	1919	1070	936	1005	1245	1108	2079	1258	1674	1600	2309	812	2384	1789	1003	2055	1750	1935	1200	1790	1858	2012	867	937	1533	667	1765	688
AFUA_1G10300	59	47	50	13	10	10	12	7	5	16	8	14	2	10	8	10	10	3	26	8	31	9	13	11	11	15	7	16	18	21	29	15	15	3	15	13
AFUA_1G10310	2361	1815	2399	3343	3667	2637	1873	1678	3041	1386	1186	937	3037	2987	2837	1635	2410	2654	1523	789	1270	3550	2130	3259	2704	2941	2845	1264	1228	1273	1763	2519	2628	1014	3382	1799
AFUA_1G10320	2556	1562	2284	1247	1432	1454	1443	1073	1609	1659	1266	994	1679	1429	1579	1189	1432	1223	2090	1723	2089	1950	973	1763	1641	1058	1003	1471	1302	1443	1041	1482	1227	825	1281	621
AFUA_1G10330	1221	1027	1107	883	1000	807	1148	988	1073	752	662	499	1115	953	857	955	996	807	906	579	734	1234	623	1003	1254	681	784	626	648	723	624	973	787	1081	1219	366
AFUA_1G10340	11007	8654	11517	3387	4680	2821	4983	4440	6045	7965	7853	6500	2923	3381	3373	4684	5648	5561	4239	4903	4102	3205	2196	3887	5345	3095	6743	7021	9290	9774	2427	3743	2563	5673	6611	3391
AFUA_1G10350	6330	3712	5233	7194	9245	15865	4469	5069	9812	3418	3241	2468	17679	14975	15590	5897	8289	9679	2678	3150	2914	19701	11785	17648	6628	3587	8158	3820	4016	5592	14283	18511	18141	5939	12095	6541
AFUA_1G10355	2889	1957	2551	1465	1666	2670	2713	1988	2055	2344	1988	1411	2802	2410	2418	2095	2002	1598	2543	2214	1985	3174	1951	3221	2321	1954	1093	1842	1763	1913	2099	3063	2353	2534	2025	993
AFUA_1G10360	5050	3655	5426	1426	1481	1264	1667	1452	2281	2721	2482	2338	1078	1137	1284	1571	2139	1774	2703	2226	2242	1306	779	1311	1891	1139	1391	3889	4691	5418	932	1104	1126	888	1957	947
AFUA_1G10370	2825	2032	3114	266	352	735	303	257	404	1315	1431	1035	271	296	814	176	410	309	828	674	868	328	319	674	441	247	376	1972	2526	3141	591	316	1014	136	322	260
AFUA_1G10380	152	110	122	4564	6095	3474	3418	2347	2844	135	73	59	3606	3617	2936	1642	2494	1961	58	19	55	5497	3785	3690	3083	2892	3608	49	78	82	2989	2881	3612	2818	3406	2685
AFUA_1G10390	5	1	0	520	472	379	578	317	265	14	0	0	669	503	255	341	230	192	4	0	0	658	473	437	609	362	146	3	1	4	475	435	332	308	205	133
AFUA_1G10400	303	273	311	562	540	856	453	389	560	107	95	79	1063	877	980	362	450	502	326	166	311	1445	705	1176	575	353	306	143	175	173	543	841	826	420	482	255
AFUA_1G10410	1009	544	844	1768	1965	1096	986	815	1054	357	263	187	1425	1409	1204	800	892	811	467	323	420	1668	1157	1362	805	768	736	571	490	640	1250	1337	1172	704	1114	582
AFUA_1G10420	148	81	104	307	407	147	336	247	212	52	33	17	333	385	174	306	191	106	38	40	48	375	232	181	265	255	198	44	58	63	242	326	114	296	303	80
AFUA_1G10430	152	97	180	2074	2213	1372	2956	2315	2805	76	52	38	1395	1480	1259	2188	2773	1923	271	104	188	1377	888	1470	2427	3504	2494	97	41	101	1125	1468	1071	1707	2846	1504
AFUA_1G10440	435	595	823	887	841	843	590	589	1831	90	53	78	887	791	999	867	1721	1351	725	427	588	1299	598	1312	1859	2083	1176	312	190	178	426	766	861	334	1836	692
AFUA_1G10450	128	49	108	858	885	765	985	882	1921	26	31	20	729	783	850	1022	1599	1364	117	58	115	869	475	870	1632	985	1886	115	91	132	461	679	691	519	1437	529
AFUA_1G10460	548	307	447	505	405	407	726	552	592	264	206	179	721	561	469	669	576	515	312	221	264	633	405	591	606	537	541	223	201	234	556	702	345	730	793	352
AFUA_1G10465	0	1	0	7	5	0	2	2	0	0	0	0	4	3	0	1	0	0	0	0	1	0	0	0	2	0	0	0	0	2	0	3	0	0	0	0
AFUA_1G10470	3463	2683	4189	786	1041	1188	1734	1351	1768	1880	1794	1491	1047	1003	1164	1447	1580	1283	2890	1855	2742	1498	1045	1367	1751	1184	1213	2662	2249	3227	1136	1123	1147	1024	1437	865
AFUA_1G10480	3433	2162	2708	486	545	278	537	355	306	2922	2387	1478	426	372	362	367	290	223	1376	1041	1236	486	335	368	492	355	314	1566	1933	2091	254	364	246	340	326	107
AFUA_1G10490	976	733	940	1084	1343	642	552	436	729	445	424	337	794	747	657	510	608	548	1017	977	1057	920	622	923	620	412	622	544	499	651	617	861	702	389	743	403
AFUA_1G10497	2274	2237	2937	2228	2617	1249	2941	2455	2634	1265	1396	1339	1583	1926	1403	2292	2389	2373	2485	1868	2394	2027	1693	1834	2538	2080	2810	1516	1433	1541	2001	2315	1321	2642	2661	2387
AFUA_1G10510	4940	4540	5131	9397	8636	12899	4293	3997	5784	5183	3836	3371	17421	14385	11557	3830	4950	5991	4623	4166	3566	17492	9072	17723	4682	4199	3748	2175	2099	2276	6833	14615	12822	4675	7600	2392
AFUA_1G10525	1307	716	1153	661	814	1105	1369	1025	1014	564	536	363	1189	1051	1127	963	885	848	874	653	966	1554	964	1452	830	782	682	863	768	1155	1108	1207	1107	909	980	543
AFUA_1G10540	995	968	1460	979	1274	1160	1190	969	1185	455	529	437	1448	1290	1163	972	977	1025	717	548	602	1686	1016	1606	1215	983	1103	938	901	1148	806	1250	916	828	1155	429
AFUA_1G10550	2655	1916	2730	684	653	630	663	559	681	2150	2184	2170	805	756	685	675	615	493	2137	2827	1866	957	712	923	762	573	508	2512	2433	2513	740	947	603	501	651	324
AFUA_1G10560	872	1168	1775	1820	1474	1106	1120	1143	3857	193	161	168	1784	1652	1353	1760	3164	3222	898	638	737	2085	1163	1648	3402	3293	3130	677	444	590	798	1478	1221	701	3226	1723
AFUA_1G10570	1095	628	815	707	689	785	1142	1052	985	436	247	256	768	623	740	1169	1176	657	1178	953	906	870	470	986	1195	764	512	570	413	595	465	725	562	839	1128	214
AFUA_1G10580	328	297	464	15539	14849	9922	14766	11420	16598	183	229	217	11435	12081	12192	12201	15326	13169	954	513	803	13082	8139	12276	13152	11156	12373	507	306	272	7201	10367	7646	7983	13851	8627
AFUA_1G10590	87	56	71	180	209	132	318	256	134	45	52	50	246	202	122	290	158	108	99	53	59	308	153	181	264	189	111	109	83	70	148	247	75	274	198	43
AFUA_1G10600	3153	1704	2619	2809	3475	1451	5936	4622	4188	2503	2547	1787	2523	2743	1811	5160	4247	3216	2658	1277	2982	2750	1849	1799	5298	2703	2844	2555	2202	3465	2284	2324	1425	3165	3567	1853
AFUA_1G10610	9015	8384	11059	7592	6523	2399	4047	4106	8249	4567	4772	5414	5159	4791	3266	4584	6330	5935	9114	6801	8503	5288	4230	4035	8784	9220	8491	8870	8198	6627	5296	5787	2505	2220	6223	3187
AFUA_1G10620	336	253	409	1137	1368	1205	1376	923	1014	102	129	115	1220	1145	1269	743	787	819	187	91	195	1483	1020	1364	1096	1089	823	237	182	349	1276	1218	1335	723	961	562
AFUA_1G10630	5524	4979	6736	15510	16894	19871	4321	4567	11604	3405	2992	2192	18813	18895	18860	5803	10415	10705	2937	1852	3043	24817	16092	25454	8958	7070	14606	3355	3531	3646	13583	15242	18342	3176	14184	10696
AFUA_1G10640	323	224	273	467	449	487	315	281	530	265	191	178	626	475	541	409	389	432	505	360	436	592	299	660	471	433	528	198	150	171	357	512	461	253	509	517
AFUA_1G10645	1525	1347	1569	384	405	606	1304	1000	964	1355	1299	1074	613	474	572	1154	1023	757	1641	1180	1330	776	610	918	1055	1040	630	1380	1129	1386	613	781	591	1110	1001	392
AFUA_1G10650	242	184	193	2909	3052	1001	770	816	1442	108	78	84	1105	1269	1260	892	1152	1053	155	111	117	844	492	953	817	498	1129	109	88	126	565	715	595	275	988	400
AFUA_1G10660	1157	838	1095	1124	1372	895	1559	1334	1746	511	593	539	581	708	947	1475	1769	1121	1141	749	989	784	467	940	1728	1285	1770	796	701	784	657	618	708	959	1687	603
AFUA_1G10670	2101	1654	2106	1441	1611	1827	1718	1508	1730	1079	1078	1254	1681	1563	1785	1538	1584	1567	2549	1719	2221	2332	1397	2004	1570	1047	1399	1748	1560	1649	1589	1863	1777	1383	1630	920
AFUA_1G10690	1534	1097	1453	2053	2248	1573	1995	1739	2210	729	642	750	1658	1531	1692	1656	2025	1675	1282	806	1074	1949	1185	1888	1890	1036	2229	1019	1054	932	1150	1421	1431	834	1875	1325
AFUA_1G10700	1593	936	1146	757	759	1069	1258	1033	889	1058	790	470	1315	1154	1124	1020	794	770	508	427	409	1514	914	1224	789	879	628	479	532	572	1208	1441	1013	1138	1020	485
AFUA_1G10710	403	466	887	478	623	1266	1267	1012	1225	178	303	412	1111	965	1169	966	1241	1124	1435	1031	1257	1526	801	1492	1233	1042	884	952	679	446	675	1073	1105	843	1137	702
AFUA_1G10720	99	64	103	659	666	684	329	250	399	27	21	17	772	703	697	251	339	330	112	43	108	722	342	693	263	254	283	54	84	84	325	578	550	138	428	194
AFUA_1G10730	243	156	148	335	298	136	190	146	269	110	56	45	248	231	199	187	203	202	196	83	137	272	174	201	211	114	292	118	92	149	173	242	85	120	232	100
AFUA_1G10740	528	426	511	526	617	693	451	369	424	336	251	237	926	823	700	367	418	384	732	695	643	1063	773	1066	543	366	431	382	296	357	634	1003	719	526	408	387
AFUA_1G10750	349	176	263	394	468	476	311	267	388	156	130	111	536	465	486	208	356	329	317	197	266	727	416	609	331	246	448	194	160	157	520	572	430	206	441	218
AFUA_1G10760	1141	1155	1496	1122	888	930	936	849	2562	631	546	427	795	823	1087	1162	2333	1997	1125	811	1038	1193	633	1222	2834	2281	1675	957	858	945	488	820	752	496	2274	999
AFUA_1G10770	1181	925	1615	1161	1101	421	1302	1216	2278	671	520	394	762	791	479	1537	2297	1337	831	694	797	924	541	613	2657	1872	2018	1666	1643	1699	587	713	374	1012	2220	1102
AFUA_1G10780	98	51	115	1105	700	917	976	1158	3366	23	26	9	1267	1244	1060	1526	2290	2813	155	138	112	1365	1074	1384	2416	1593	1560	129	157	214	1350	1078	1174	834	2387	1180
AFUA_1G10790	735	411	486	559	625	435	489	441	386	220	185	102	940	879	412	433	321	212	419	271	384	862	529	386	546	551	377	372	321	449	517	662	303	490	352	144
AFUA_1G10800	496	281	286	798	829	701	1066	743	887	271	160	106	727	676	640	888	912	580	355	253	295	650	345	855	1025	1406	883	172	121	207	405	543	574	546	1081	457
AFUA_1G10810	4242	2665	3276	1290	1900	2064	1956	1845	1838	3652	3070	2059	2041	1856	1981	1890	1817	1633	2886	2384	2692	2747	1732	2342	1595	1236	1421	2640	2466	2632	2040	2597	2017	1701	1876	1102
AFUA_1G10820	1171	852	906	2035	2061	2400	843	786	997	904	730	538	3345	2775	1837	1013	936	733	533	432	450	2963	1673	2970	775	401	946	419	514	585	1569	2414	2052	765	931	743
AFUA_1G10830	1404	1118	981	199	239	185	266	235	125	1132	878	536	189	207	199	185	172	99	335	316	303	267	159	246	144	177	153	524	780	752	143	157	202	236	189	85
AFUA_1G10840	2577	1910	2214	2258	2925	1346	828	876	978	2028	2569	1987	1195	1467	1296	879	957	923	1946	2625	1728	1341	923	1436	790	541	1115	1655	1670	2092	1137	1578	1043	826	1183	946
AFUA_1G10850	3489	3860	5468	1187	1162	2491	3269	2920	3019	2251	2753	3318	2066	1836	2642	3466	2914	2836	6569	6472	5778	2676	1717	2975	2490	2811	1725	4853	3841	3094	2076	2215	2202	3265	3610	1748
AFUA_1G10860	2674	2027	2856	1986	2346	1951	1733	1453	2050	1559	1264	1029	1747	1814	2042	1506	1766	1519	2122	1372	1911	2068	1108	2267	2006	1628	1562	1531	1393	1937	1019	1237	1703	1120	1789	882
AFUA_1G10870	1185	811	1010	307	379	243	196	227	209	1312	1636	1542	275	247	277	251	221	226	730	1137	766	290	189	402	233	104	217	884	1013	991	161	292	191	239	380	142
AFUA_1G10880	3769	3937	4916	8088	7442	5105	2533	3689	7974	3879	3798	4882	2936	3589	7021	4406	7502	8209	2299	1331	2356	4277	2803	6199	4161	2778	9758	3393	4380	3160	2455	3005	3401	1363	7527	5787
AFUA_1G10890	239	146	154	557	1047	363	619	426	440	194	200	137	913	871	322	477	428	431	72	34	73	1669	982	322	311	186	415	69	92	56	1065	1178	316	412	724	156
AFUA_1G10900	282	189	234	698	630	902	1351	1095	822	123	102	68	1427	951	946	1048	884	755	165	109	157	1736	967	1189	893	663	527	151	133	133	1113	1387	953	1134	836	422
AFUA_1G10910	51	47	37	10177	10241	15892	7508	6812	8738	59	41	18	18428	16165	17059	7292	7875	9090	55	23	38	19360	11325	20602	6300	5483	4983	49	38	59	11052	15238	15822	8045	10157	4479
AFUA_1G10920	9853	7061	8198	1484	1994	1350	1161	914	957	9980	8961	8428	1809	1594	1342	836	782	612	6183	6162	5697	2201	1654	1536	791	618	991	5928	7413	6451	2047	2317	1323	1383	940	640
AFUA_1G10930	803	769	739	4006	6741	13423	370	255	244	730	543	387	9184	8871	14145	254	219	205	193	122	132	9940	8109	22067	199	203	305	245	288	489	8471	5679	15297	335	429	373
AFUA_1G10940	2156	1874	2558	2139	1830	2299	1778	1376	1399	1192	1284	1366	1342	1279	2388	1368	1214	1001	2827	1134	2540	1777	1033	2335	1208	892	1244	1890	1586	1380	876	933	1569	1071	1298	912
AFUA_1G10950	5415	4358	6925	2183	2238	2544	4440	3874	4276	3854	3592	3558	2291	2040	2443	3979	4145	3497	5887	3261	6110	2578	1612	2579	4662	3187	2680	5425	5067	5035	1989	2269	1899	3288	3609	2060
AFUA_1G10960	6127	4400	5408	1358	1664	1682	1663	1268	1301	4209	3175	2312	1479	1483	1303	1379	1253	844	3025	3377	2648	1792	1167	1721	1421	1276	871	3253	3582	3892	1295	1833	1298	1342	1561	441
AFUA_1G10970	2169	1382	1652	2152	2223	3582	1912	1612	1891	1082	643	593	3322	2906	3214	1486	1850	1591	2056	1016	1943	5011	2633	4220	1779	1426	1300	1191	1050	1171	2295	3348	3251	1575	1832	968
AFUA_1G10980	453	284	378	595	573	411	627	553	1040	232	235	166	561	514	391	686	774	693	420	292	349	702	388	520	958	937	998	155	190	176	398	511	387	526	1049	698
AFUA_1G10990	162	182	217	676	612	521	579	553	1525	4	11	10	606	615	662	805	1213	1210	143	70	106	734	390	892	1554	1571	1148	54	20	51	318	561	655	386	1507	697
AFUA_1G11000	1192	955	994	260	286	278	371	337	212	920	930	777	342	300	263	262	204	152	649	471	573	398	228	216	180	231	187	642	631	722	357	377	272	274	268	139
AFUA_1G11010	2	4	2	252	263	306	310	325	271	0	6	7	554	411	306	339	325	299	1	4	5	428	258	340	409	252	259	0	3	2	316	540	248	396	447	121
AFUA_1G11020	3	1	0	22	26	24	28	12	5	1	0	0	58	19	16	12	8	4	0	0	0	50	24	13	13	9	7	0	0	1	22	36	5	17	17	2
AFUA_1G11030	1	0	0	33	25	44	49	29	16	2	0	1	58	63	49	34	23	20	2	0	2	108	57	63	28	30	20	1	1	0	34	46	38	48	47	7
AFUA_1G11040	6	1	6	72	112	77	200	143	61	32	27	31	103	96	62	175	66	64	0	3	1	95	86	59	100	152	50	0	3	0	93	108	38	166	119	18
AFUA_1G11050	360	237	297	103	155	124	403	325	274	733	439	316	138	138	126	329	170	214	158	136	146	131	71	122	227	192	223	122	128	133	150	155	131	296	222	85
AFUA_1G11055	0	0	0	0	0	0	0	0	0	0	0	0	0	0	0	0	1	0	0	0	0	0	0	0	0	0	0	0	0	0	0	0	0	0	0	0
AFUA_1G11060	3017	2161	2667	910	2010	775	1486	1315	765	2199	2334	1772	562	606	779	1095	822	591	1491	1287	1526	822	545	801	1054	875	1178	2356	2641	2806	672	753	683	921	1003	632
AFUA_1G11070	1477	1188	1435	1817	1801	1865	2090	1804	1731	1476	1409	1203	1623	1530	1848	1521	1601	1353	1694	1451	1632	2415	1653	2385	1547	1140	1887	1373	1337	1120	1413	1706	1588	1250	1769	1093
AFUA_1G11080	1303	1061	1420	1848	2402	2031	1767	1592	1805	657	621	629	2337	2101	1931	1328	1582	1505	1416	845	1416	3414	2078	2226	1628	983	2574	1095	877	976	1916	2199	1762	1262	1838	1339
AFUA_1G11090	1846	1152	1831	1019	1390	843	723	603	1063	1037	857	598	647	878	875	717	808	783	583	446	680	977	714	989	1044	763	1207	985	1122	1183	1115	969	932	557	1000	584
AFUA_1G11100	569	414	556	434	730	579	411	363	490	370	347	275	701	710	815	473	476	509	312	389	316	869	472	949	552	262	602	462	465	510	449	867	612	496	681	380
AFUA_1G11110	878	646	844	2254	2155	1915	3525	3183	3879	407	334	259	1758	1567	1950	3646	3616	2782	610	261	413	2433	1422	2236	3858	2445	3039	427	456	544	1262	1402	1511	2112	3002	2228
AFUA_1G11120	2168	1936	2517	2438	3100	2591	1676	1570	2083	1122	1197	1103	3126	3072	2695	1447	1662	1893	1487	1428	1390	3504	2398	3019	1560	1061	1981	1259	1457	1641	2446	3409	2639	1450	2272	1893
AFUA_1G11130	5772	6061	7671	11219	9936	17803	5551	5086	7843	4111	4188	5790	22693	19695	18439	4955	6730	8897	10799	9164	8333	26740	13741	26240	6156	5041	4820	4836	3555	2752	11131	19025	19947	6302	9951	3417
AFUA_1G11140	2413	1822	2145	1035	1397	827	791	828	909	1204	1164	931	753	950	739	767	1088	767	1382	1081	1043	854	633	976	804	375	1225	1224	1454	1808	778	1055	626	704	878	921
AFUA_1G11150	1220	734	1031	905	1027	799	825	648	891	693	521	430	1011	888	844	751	790	548	699	545	708	844	413	926	749	612	558	552	599	624	606	934	740	557	775	347
AFUA_1G11160	314	553	925	1236	1146	1182	752	698	2754	56	45	63	1018	1034	1442	926	2136	2387	242	163	209	1374	782	1730	2266	2305	1870	150	105	131	417	724	1201	381	2452	1205
AFUA_1G11170	281	150	238	82	140	29	227	131	131	231	201	152	58	63	43	162	157	50	92	60	102	40	49	58	203	248	69	160	155	224	72	58	49	254	184	29
AFUA_1G11180	1509	1472	1758	2704	7413	2259	3354	1457	2864	1403	1653	1560	1338	3355	2810	555	2511	2213	4501	2744	5096	3941	6680	4076	1442	5977	5561	2411	1752	1213	3590	2858	5591	3131	4973	4022
AFUA_1G11190	6669	6635	7555	11203	9484	16224	9113	8207	9760	5138	4331	4005	24827	20087	16160	9663	9365	8510	3847	4272	3427	23477	12240	21569	9537	9773	6653	3690	4040	3913	9998	18255	14641	8470	12040	3489
AFUA_1G11200	9395	6902	5766	714	952	693	593	445	482	8422	6529	4356	880	743	667	469	389	382	1473	1600	1236	938	705	914	422	322	433	2914	3919	4437	857	1072	700	517	434	205
AFUA_1G11210	276	224	228	120	109	69	88	72	60	136	136	96	77	66	87	76	33	46	135	108	117	88	50	78	72	38	81	121	130	225	51	107	62	62	67	32
AFUA_1G11220	1517	1287	1641	36462	40575	30828	25909	24329	33211	883	582	403	25717	33148	34657	26584	27451	32693	3582	1583	1947	29219	23023	33100	21187	17429	44375	1724	1714	974	42170	34776	34743	16125	36446	36072
AFUA_1G11230	63	44	70	36	55	11	72	75	66	8	9	5	17	23	6	102	83	44	33	15	35	28	12	11	57	26	80	21	32	45	26	27	20	78	59	38
AFUA_1G11240	10	11	7	5	2	0	7	3	11	6	3	1	2	6	1	5	12	2	4	6	4	1	0	1	9	3	4	15	8	10	0	4	2	4	2	3
AFUA_1G11250	3	2	0	388	327	544	894	732	740	6	1	5	990	791	500	893	757	428	5	3	3	1031	637	542	891	525	263	6	7	2	799	1185	418	588	396	240
AFUA_1G11260	0	0	0	5	1	1	17	11	7	0	0	0	9	13	3	11	8	5	0	0	0	12	5	4	5	9	7	0	0	0	26	21	0	14	3	0
AFUA_1G11270	0	0	0	22	1	4	99	91	59	0	0	0	25	15	9	113	96	32	5	0	1	40	13	2	125	44	33	0	0	0	20	19	1	50	42	9
AFUA_1G11280	0	0	0	15	8	12	128	134	80	0	0	0	35	40	14	192	115	89	2	0	0	31	12	18	127	55	55	0	0	3	26	33	6	133	66	18
AFUA_1G11290	0	0	0	29	22	14	28	20	24	0	0	0	42	35	10	29	19	42	0	0	0	69	33	32	68	9	79	0	0	0	16	17	5	65	10	22
AFUA_1G11300	3	0	0	8	7	17	57	42	34	0	0	0	23	10	10	33	38	26	3	0	5	53	23	26	91	13	37	1	0	0	9	33	12	98	29	23
AFUA_1G11310	0	0	0	3	0	1	1	5	5	3	0	0	2	5	0	8	4	6	0	2	0	4	0	5	3	2	0	0	0	0	4	5	1	4	6	4
AFUA_1G11320	0	0	0	1	0	0	3	0	3	0	0	0	0	0	2	2	0	6	0	0	0	4	0	0	2	2	0	0	0	0	0	3	0	3	0	0
AFUA_1G11330	1	0	0	16	5	13	46	18	33	0	0	2	6	7	7	11	28	28	1	0	0	10	21	12	11	9	34	0	0	0	50	17	13	2	10	27
AFUA_1G11340	0	0	0	3	0	5	22	15	20	0	0	0	1	1	3	3	24	9	0	0	0	4	7	3	5	5	11	0	0	0	16	3	4	5	1	12
AFUA_1G11350	1	0	0	11	8	34	30	15	54	2	0	0	6	5	22	3	49	54	4	0	1	7	18	2	20	7	55	0	2	0	41	7	15	11	32	92
AFUA_1G11360	0	5	0	41	21	19	73	47	35	0	0	5	41	32	13	46	28	42	4	2	6	60	19	39	44	72	31	0	0	0	45	70	10	47	17	23
AFUA_1G11370	18	13	9	38	76	65	100	74	69	13	7	3	102	90	45	82	77	46	14	11	9	102	48	50	63	72	48	7	6	6	58	81	45	62	47	32
AFUA_1G11380	41	38	65	391	500	812	1475	1275	1215	18	29	16	846	697	944	702	1199	1265	21	21	17	1537	1081	1392	1252	1104	454	30	39	52	1054	1518	1322	2683	1244	422
AFUA_1G11390	42	13	23	819	904	1438	2019	1825	1899	18	30	33	1404	1236	1474	1788	1825	1529	57	52	64	2117	1541	2046	2384	1151	1339	36	36	49	1747	2283	1795	2063	1807	1054
AFUA_1G11400	552	355	464	350	311	330	501	312	328	475	441	348	511	376	350	333	364	269	766	459	678	544	393	475	411	297	252	422	342	449	317	522	337	269	318	189
AFUA_1G11410	517	342	501	291	307	282	214	135	293	500	637	633	372	381	285	184	207	208	887	526	767	434	335	384	211	160	207	484	430	493	237	342	244	182	217	169
AFUA_1G11420	6655	5584	7732	3844	4226	4940	7303	5837	6028	5681	6048	5666	5567	4803	5470	5616	5171	4960	4183	2220	3815	8610	5049	5995	6505	3959	4817	4879	5574	5477	5090	5475	5161	5288	5793	3051
AFUA_1G11430	310	239	317	66	126	151	170	105	103	356	328	326	92	67	182	68	106	81	206	68	187	181	101	122	115	73	59	185	284	245	75	40	172	49	91	44
AFUA_1G11440	150	68	66	378	616	657	309	191	224	94	58	26	541	459	610	183	219	168	108	54	100	958	453	687	238	155	233	65	37	41	439	482	604	182	233	96
AFUA_1G11450	20	16	14	936	965	1895	1811	1314	1317	10	4	7	1292	1175	1757	1223	1264	1115	18	5	16	2022	1404	2303	1544	996	960	8	8	12	1133	1030	1902	1138	1263	725
AFUA_1G11460	4628	3917	6720	7594	8541	6727	6022	5466	6863	1503	1127	1107	7371	7080	6908	5667	6849	4931	10127	8101	7527	8656	5126	7778	6336	5825	4626	7059	4694	5653	5725	7324	6000	5719	7019	3135
AFUA_1G11470	528	414	506	1588	1853	2392	1823	1429	1755	374	224	172	2472	2125	2077	1557	1619	1577	395	353	296	2715	1531	2896	1525	1314	1152	264	226	291	1452	2227	2008	1537	1952	1087
AFUA_1G11480	586	419	507	3640	3138	4889	4800	4791	4081	265	227	206	7559	5928	4329	6311	4777	3587	352	284	326	7607	4648	5998	4061	3443	2393	224	209	181	6017	8260	4410	5694	4375	2827
AFUA_1G11490	2676	2787	3562	2993	3013	1689	3362	2649	2394	2231	2467	2719	2629	2521	1492	2829	2681	1694	2672	2572	2448	3030	2188	2008	3565	2081	1342	3123	4064	3010	2292	2397	1373	1632	1898	744
AFUA_1G11500	320	228	282	597	900	1225	554	489	363	215	196	110	1028	862	1339	306	333	328	165	127	153	1316	1002	1975	340	236	332	206	206	256	847	1058	1760	785	545	189
AFUA_1G11510	1178	957	1336	703	956	747	407	597	607	664	728	627	564	691	752	699	695	654	1024	783	1096	552	388	793	500	198	988	1025	1079	892	438	478	726	307	777	538
AFUA_1G11520	287	176	195	355	245	302	271	247	182	228	152	123	428	379	318	253	225	147	85	67	91	469	289	382	209	155	194	129	100	96	313	465	262	205	223	52
AFUA_1G11530	401	236	276	383	372	569	503	425	453	339	215	211	713	780	583	471	405	441	321	232	291	803	635	886	381	270	335	165	136	150	768	791	600	526	590	306
AFUA_1G11535	110	89	127	218	272	249	236	190	215	78	52	41	259	303	250	190	240	239	184	118	143	324	239	416	201	202	214	37	30	47	193	337	259	232	320	166
AFUA_1G11540	169	140	219	1069	919	1252	1208	929	1125	52	50	50	1637	1620	1700	1010	884	1050	396	273	336	2419	1729	2161	897	823	977	117	68	79	1379	1791	1676	1209	1556	1049
AFUA_1G11550	2011	1582	1424	2435	2186	2464	948	759	846	2007	1711	1138	3014	2703	2408	762	877	756	641	495	568	3230	2038	2928	764	656	1169	929	1065	1275	2091	2451	2422	700	1211	937
AFUA_1G11560	25	11	14	61	73	59	60	84	64	25	21	12	105	70	40	81	43	73	72	50	64	106	46	60	96	76	51	31	24	18	52	91	44	72	90	29
AFUA_1G11570	17	5	7	40	64	41	86	61	35	5	0	2	77	70	31	54	42	46	40	25	16	84	75	64	106	47	46	11	1	13	82	94	32	43	29	10
AFUA_1G11580	205	94	169	110	161	69	119	76	72	23	22	7	153	150	90	125	89	47	433	208	390	139	68	77	195	90	51	159	76	128	75	99	56	91	69	35
AFUA_1G11590	14	7	8	31	6	22	28	42	53	6	5	4	20	22	6	58	28	22	53	20	44	23	13	20	36	24	11	14	2	21	35	34	31	33	20	16
AFUA_1G11600	151	57	99	58	77	31	502	488	521	77	54	28	61	61	28	840	612	388	74	48	56	80	50	41	742	414	137	103	56	87	143	166	36	318	499	82
AFUA_1G11610	366	140	177	77	69	60	152	170	145	289	191	130	107	124	46	261	206	85	270	180	245	122	61	66	305	116	35	157	133	181	84	158	54	162	184	26
AFUA_1G11620	950	484	503	143	163	232	469	463	554	896	671	438	345	201	211	608	698	329	525	244	614	388	175	223	970	421	208	467	423	470	166	206	154	246	429	99
AFUA_1G11630	482	212	281	355	405	371	369	442	766	262	218	194	434	366	312	817	844	565	359	161	332	587	328	330	982	432	341	218	210	184	300	435	196	228	519	309
AFUA_1G11640	55	44	39	502	475	223	93	83	153	34	22	24	666	643	170	188	184	222	55	77	82	789	444	197	130	51	86	36	25	49	428	550	110	76	210	47
AFUA_1G11650	235	161	191	230	334	118	373	273	156	197	192	126	229	304	134	261	143	123	236	142	183	329	241	144	245	164	118	126	152	171	212	311	56	176	194	75
AFUA_1G11660	623	490	479	739	931	1069	1176	809	748	603	655	411	1109	943	1141	752	601	741	612	264	417	1489	886	1379	941	694	529	332	299	316	645	877	999	966	786	345
AFUA_1G11670	227	155	190	224	192	248	263	201	227	133	127	91	415	340	227	157	190	149	341	257	374	534	263	415	234	156	116	176	127	145	269	386	297	222	173	65
AFUA_1G11690	686	511	796	1585	1453	1411	2244	1866	2146	356	321	257	1703	1627	1561	2004	2019	1836	930	653	780	2030	1485	1773	1892	1190	2152	579	510	894	1588	1853	1613	1610	2073	1831
AFUA_1G11700	103	101	150	720	609	671	575	500	730	38	19	16	744	791	776	485	723	647	280	165	198	964	734	970	501	296	704	78	67	48	678	781	777	404	750	592
AFUA_1G11710	5136	4807	5546	13893	12106	15776	6105	5800	9026	4477	2680	2180	22873	21268	15902	6130	7664	9008	2746	2512	2153	24929	15920	21186	7422	7467	6109	1448	1499	1829	14363	22547	17322	7665	11406	4566
AFUA_1G11715	2069	1365	1446	23	23	9	17	7	14	900	636	347	10	4	14	17	11	1	392	306	337	15	21	13	18	13	29	562	823	963	14	22	11	9	23	17
AFUA_1G11720	282	223	289	341	324	137	907	500	369	165	139	125	298	401	196	442	315	205	123	110	95	382	363	204	515	566	338	113	177	142	640	607	137	454	299	102
AFUA_1G11730	5220	4894	6886	8055	8756	14037	12840	11316	13656	3125	3105	3070	13767	12349	13639	11852	12649	13047	7878	6333	7059	17456	10446	17732	12041	11984	9258	5251	4698	4516	10743	13540	13345	11840	14648	8404
AFUA_1G11740	1682	1213	1603	260	301	556	940	675	498	1349	1758	1794	268	210	573	860	576	374	1445	2297	1571	360	265	532	768	581	196	1616	1809	1627	1438	745	1125	645	471	100
AFUA_1G11760	814	758	1258	2163	2032	2178	1805	1521	1727	643	701	660	2417	2499	2262	1470	1466	1321	1657	944	1641	2359	1350	2299	1595	726	1744	1218	1043	740	1493	1871	1661	955	1439	955
AFUA_1G11770	3426	2623	3120	2210	2729	2284	2431	2013	2564	2295	1964	1335	3082	2938	2637	2249	2335	2204	1467	1232	1375	3486	2034	2820	2346	1932	1946	1972	2605	2323	1962	3287	2275	2159	3151	1457
AFUA_1G11780	412	471	636	2012	1542	2001	1110	933	1899	213	222	262	2965	2651	2213	1020	1388	1866	745	639	731	2913	1426	2618	1476	1169	969	528	406	407	1014	1778	1890	728	1704	804
AFUA_1G11790	351	232	311	1145	795	655	543	563	1631	106	71	39	946	742	624	1029	1390	1285	143	103	127	906	404	678	1520	993	997	175	155	224	432	789	581	255	1435	580
AFUA_1G11800	508	309	538	997	1291	506	1600	879	804	150	123	114	697	960	513	949	754	549	327	237	298	734	624	492	1116	1002	589	310	293	290	742	730	410	735	784	367
AFUA_1G11805	114	88	104	95	181	194	445	330	319	115	123	120	135	164	263	433	301	303	129	151	137	125	96	289	276	167	471	121	115	89	106	131	166	258	540	253
AFUA_1G11810	165	85	133	163	129	253	601	481	289	53	19	45	324	284	228	524	337	204	56	39	56	358	185	259	483	246	193	80	87	162	167	220	169	470	422	108
AFUA_1G11820	55	50	46	43	79	72	667	736	574	47	17	17	147	99	80	1081	667	500	28	18	21	141	93	80	1124	338	799	30	40	65	182	161	65	866	570	339
AFUA_1G11830	689	289	486	199	176	145	446	260	199	275	187	152	279	257	177	251	181	172	554	327	545	295	175	191	263	371	197	354	247	306	265	321	142	313	269	129
AFUA_1G11840	101	53	44	30	32	18	34	33	11	35	55	27	23	25	24	36	23	4	22	35	11	26	20	36	29	18	7	34	34	31	24	25	38	31	18	7
AFUA_1G11850	3497	2288	3288	446	513	271	382	301	525	2346	1997	1605	314	353	335	358	526	360	1432	921	1323	283	199	245	573	319	336	2200	2442	2689	237	316	236	180	373	127
AFUA_1G11860	2504	2075	2654	1068	1225	1165	873	818	1432	1962	1546	1350	1362	1418	1188	879	1296	1240	2191	1198	1741	1356	790	1354	1178	1226	1146	1515	1495	1325	725	963	1076	650	1718	580
AFUA_1G11870	1190	1100	1434	912	776	1109	988	762	1301	615	645	531	1248	1163	1217	833	1030	1022	1365	812	1204	1598	986	1462	1056	742	986	903	826	882	925	1195	1321	614	1307	608
AFUA_1G11880	97	137	173	537	602	481	1094	868	1491	41	34	23	634	588	500	994	1194	1273	55	36	23	521	364	536	1381	773	1623	23	23	41	395	408	475	784	1723	1218
AFUA_1G11890	508	434	616	1864	2039	1237	1068	1062	2244	248	215	146	1390	1264	1235	1335	2060	1957	447	204	389	1691	1007	1410	1862	1644	1870	314	326	232	775	1052	1072	527	2080	1180
AFUA_1G11900	506	320	513	4405	6264	3702	16880	12220	9388	269	267	190	4441	6055	4668	10383	8448	8391	874	481	1004	7701	7874	6349	10752	9687	7896	635	651	462	9229	7036	5122	8825	9771	5636
AFUA_1G11910	241	180	228	407	549	248	10122	6978	4329	154	168	140	639	897	233	7685	4114	3774	154	185	113	1208	1087	333	6178	6889	909	133	221	257	2497	2260	336	8239	4059	1308
AFUA_1G11920	908	528	740	1377	1471	1100	1441	1029	1666	294	254	168	1431	1282	1263	1054	1426	1199	1358	574	1300	1747	1087	1290	1709	837	1252	655	498	511	1340	1281	1090	836	1147	624
AFUA_1G11930	4307	3521	4472	1893	3748	2724	5023	3395	3837	3256	3296	2539	2242	2262	3349	3165	3489	2989	4545	2748	4461	2628	2048	3496	4035	3423	3827	3465	3765	3519	2725	2062	3669	2955	4542	1913
AFUA_1G11940	395	409	610	2773	2454	1723	1412	1459	3411	69	74	54	1789	1971	2009	1562	2455	3062	511	314	370	2401	1586	2437	1937	1547	3157	200	144	258	1403	1892	1626	1050	2738	2345
AFUA_1G11950	3044	3265	2923	7070	9626	4849	6673	5528	9645	5760	4484	4640	2854	4673	6429	4903	7144	8186	1668	870	1604	4043	3071	7302	4879	5635	15599	1427	1810	1066	2315	2476	4185	3071	8873	10193
AFUA_1G11960	1820	1956	2305	2694	3796	2912	1163	1359	4801	427	530	520	3125	3720	3036	1312	2619	4353	733	442	505	3281	2021	3972	2830	2310	3845	623	756	1157	1223	1908	3167	1159	4016	1519
AFUA_1G11970	4055	2958	4736	1159	1200	2683	2466	1924	1894	2045	2191	2180	1880	1576	2740	1803	2008	1620	3327	2061	3004	2772	1593	2894	2056	1248	1314	3234	3224	3670	1882	1984	2908	1375	1800	732
AFUA_1G11980	803	546	549	677	769	863	716	540	516	692	510	324	941	1069	969	551	483	541	306	253	269	1115	703	1192	385	483	403	359	390	508	545	888	829	521	670	167
AFUA_1G11990	199	192	215	314	331	423	488	435	495	173	124	105	599	439	418	456	535	332	364	292	365	658	358	660	541	259	329	168	118	156	255	482	372	360	501	131
AFUA_1G12000	1029	849	1264	1831	1924	1617	2201	1812	2642	486	460	369	1754	1577	1850	2049	2128	2145	797	313	754	1560	818	2130	2700	1830	1886	664	605	751	812	1149	1403	1473	2184	1288
AFUA_1G12010	877	545	724	759	822	706	652	572	576	524	418	277	763	725	669	496	557	396	495	546	458	1067	621	965	582	544	579	384	415	416	569	752	583	586	575	216
AFUA_1G12020	15130	12331	17749	6833	8037	4557	13139	13647	14662	11668	11866	9666	3114	3822	5996	12781	14146	12710	8110	7195	8023	6167	4708	5578	17110	18412	19784	17839	23069	22000	4591	4690	3361	10238	17601	10463
AFUA_1G12025	336	205	354	237	252	243	210	201	294	50	65	35	200	297	201	162	242	227	374	440	333	233	167	296	181	305	312	402	372	478	291	311	185	186	364	307
AFUA_1G12030	4547	2788	4988	860	1201	1468	926	1337	1737	2135	2309	2212	1039	1200	1788	1070	1710	1920	3634	2568	2795	1766	1263	1712	1412	1050	2203	5077	5700	6143	1111	1314	1293	1018	2434	1441
AFUA_1G12040	813	768	928	2469	2379	1746	2154	1961	2540	522	552	531	1726	1691	1832	1947	1994	1879	871	562	803	1937	1221	1974	2292	1943	1590	675	677	457	1349	1646	1498	1685	2084	1292
AFUA_1G12050	428	281	347	383	493	379	680	541	435	257	210	174	429	434	328	507	452	310	323	277	277	459	321	521	602	466	419	219	280	270	331	431	317	633	625	240
AFUA_1G12060	893	510	731	298	323	265	619	586	706	251	177	98	234	252	256	615	654	459	327	317	301	313	253	330	887	1443	595	505	488	632	304	398	241	513	980	357
AFUA_1G12065	2660	2240	3076	1995	1752	1428	1399	1220	2252	1595	1239	1141	1562	1750	1258	1451	2104	1731	2447	2461	2101	1786	1186	1958	2029	2159	1892	1861	1774	1938	846	1523	1206	1350	2484	684
AFUA_1G12070	3367	2253	3100	2460	2456	3150	1821	1620	2950	2034	1880	1794	3627	3353	2910	1880	2443	2749	3136	2950	2786	4897	3359	4186	2334	2507	1961	2704	2850	2660	3558	4422	3245	2131	3153	1558
AFUA_1G12080	2343	1927	2418	573	450	745	962	789	854	2068	2325	2182	878	656	719	899	915	748	3078	2485	2886	993	541	787	928	544	537	2901	2964	1907	577	828	543	643	839	331
AFUA_1G12090	1184	1054	1290	418	466	527	458	416	347	752	1026	963	699	539	477	429	344	277	1704	1405	1731	765	435	553	329	160	240	1013	955	713	508	657	432	349	331	149
AFUA_1G12100	15	17	26	37	52	23	21	27	10	17	12	12	23	34	32	17	15	19	116	100	94	27	10	39	11	7	6	25	20	24	9	31	23	2	10	9
AFUA_1G12110	502	542	655	1600	1398	2548	1068	992	1422	268	209	198	2842	2474	2242	1050	1341	1461	1337	1054	1087	3291	2220	3458	1117	929	1075	402	278	222	1942	2682	2334	1183	1523	710
AFUA_1G12120	488	316	461	536	477	468	764	700	893	203	142	139	578	533	421	819	897	603	661	513	650	637	371	578	1291	646	419	359	301	442	314	522	306	399	658	196
AFUA_1G12130	87	55	68	303	366	405	600	478	523	62	28	25	625	558	505	544	516	454	54	27	47	630	433	677	549	461	407	72	60	74	388	570	373	793	527	371
AFUA_1G12140	3796	2987	3722	1159	1329	706	556	479	1146	3292	3207	2257	896	927	710	670	917	912	2715	2379	2246	957	633	1007	1106	772	1133	1903	2095	2237	585	839	616	414	1034	427
AFUA_1G12150	4519	3307	4006	1978	1843	2408	2655	2270	2746	2862	2686	2251	3091	2537	2655	2547	2612	2407	2438	1822	2218	3815	2046	3238	2745	1722	1971	2337	2522	2293	1881	2745	2202	2403	2618	1090
AFUA_1G12160	827	673	923	564	428	634	407	285	400	888	924	929	686	609	723	333	311	294	1233	1607	1496	833	570	761	274	178	343	874	769	540	638	775	645	425	419	245
AFUA_1G12170	1792	2146	2796	4733	4971	5011	3144	2775	5651	599	461	537	5645	5901	4898	2727	4095	5106	3078	1892	2593	8747	5369	6393	4529	4154	4712	1337	875	933	5036	6162	5656	2563	5359	3332
AFUA_1G12180	4493	3580	5117	2158	2436	2407	3282	2438	2629	2995	3080	2918	2461	2328	2456	2378	2619	2098	1974	1780	1864	3222	2211	2666	2558	2621	1988	3441	4182	3872	2967	3175	2555	1759	2518	1438
AFUA_1G12190	188	129	128	198	198	103	263	214	159	118	88	90	202	193	95	214	216	107	156	109	109	200	143	123	174	178	129	147	129	192	156	159	84	129	165	63
AFUA_1G12200	407	453	426	2339	2508	658	607	633	1246	271	271	318	1460	1393	575	691	850	993	495	447	437	768	513	624	1021	1567	2152	272	299	274	666	931	471	542	1855	1798
AFUA_1G12210	161	162	157	97	85	91	74	36	28	198	157	96	53	57	106	51	35	38	125	108	121	69	62	75	36	73	35	108	127	134	69	53	103	76	48	11
AFUA_1G12220	81	65	64	379	346	206	287	231	263	57	78	46	185	194	230	280	254	201	17	8	20	200	152	234	290	195	292	19	19	27	109	180	163	203	301	100
AFUA_1G12230	124	105	67	425	332	291	355	344	312	94	112	77	228	213	345	347	363	198	42	29	31	330	189	293	322	218	341	13	35	41	152	106	217	183	329	122
AFUA_1G12240	68	27	41	131	126	109	288	226	133	14	29	16	143	163	142	197	148	59	14	10	17	103	112	105	255	134	89	17	27	65	410	198	188	415	123	63
AFUA_1G12250	13202	12707	16674	34547	48773	17024	3493	4618	22325	12502	15201	19217	20860	30866	18592	4401	14907	27200	8233	12000	7778	27711	34589	21495	10137	12305	51666	13524	15922	14820	53043	47293	19791	4401	28116	29644
AFUA_1G12260	2858	2300	3713	2727	2607	1639	2212	2041	3325	1078	933	700	1851	1948	1898	2225	2720	2748	2090	1319	1648	2312	1444	2138	3167	2251	2971	1918	1721	2156	1381	1863	1721	1787	3148	1754
AFUA_1G12270	1002	943	1216	1009	1045	1171	873	697	1050	458	350	441	1186	1131	956	800	1076	791	1417	1379	1123	1499	991	1635	825	778	827	853	732	693	884	1426	1124	1202	1438	495
AFUA_1G12280	820	646	747	1380	1613	1539	969	616	997	365	327	318	1702	1595	1529	638	779	838	964	907	921	2065	1109	2197	735	697	802	528	413	484	942	1289	1505	662	1028	521
AFUA_1G12290	1067	758	1017	1702	1611	2447	832	929	1418	577	362	352	2497	2310	2337	922	1022	1188	895	778	772	2824	1970	3057	872	695	1027	439	421	386	2182	2736	2407	1068	1394	861
AFUA_1G12300	739	399	606	1605	1424	600	941	901	1785	241	215	191	716	767	465	953	1350	975	774	486	621	886	787	599	2041	2376	2268	539	340	541	1032	1008	507	516	1923	1340
AFUA_1G12310	373	167	220	882	685	370	1353	1950	5784	245	182	136	718	618	392	3305	5824	3157	414	233	375	653	461	451	7776	2184	3393	234	191	281	540	691	338	775	3944	1521
AFUA_1G12320	470	418	381	330	247	103	331	364	370	497	533	304	262	203	108	378	421	236	189	336	217	170	128	149	411	192	329	230	279	252	173	248	111	311	548	137
AFUA_1G12332	6230	4810	5363	2797	3685	2410	3263	2387	3178	6051	6569	4841	2358	2069	2449	2681	3240	2306	3737	1082	3776	3288	2370	2226	3875	2024	1997	3653	4502	4313	2472	2358	2281	1802	2650	1139
AFUA_1G12340	38557	25992	36046	1419	1628	1316	2313	2090	1915	26537	26513	21260	1726	1437	1067	2072	2098	1386	12640	13820	14590	2063	1456	1321	2270	1493	1704	24539	27932	29747	2252	2163	1217	2043	1579	1021
AFUA_1G12350	10476	7336	7874	626	701	600	323	238	314	7182	7613	5726	1374	931	448	221	258	206	2227	2929	2166	1383	710	620	263	311	170	3788	4329	6691	858	1118	425	213	237	157
AFUA_1G12360	70	46	47	11	14	8	18	12	7	22	29	27	10	13	1	7	6	6	16	20	9	12	10	10	12	15	7	23	11	45	12	3	3	5	8	6
AFUA_1G12370	6637	6650	9337	1375	1672	1903	1763	1544	2237	4627	6138	6995	1732	1721	1960	1568	1955	1927	6583	5873	5797	2380	1436	2342	1927	1371	2371	8414	10198	7895	1510	1726	1569	1397	2392	1498
AFUA_1G12380	5279	3838	4182	2351	2972	1421	1045	822	1004	5125	4680	3336	1585	1554	1420	913	970	631	1394	1251	1181	1396	790	1900	1174	1208	1058	1790	2522	2739	891	1414	1202	745	1468	294
AFUA_1G12390	1596	1234	1705	5614	6207	2515	1975	1559	3127	832	921	788	3865	3729	3291	1658	2450	2585	1202	872	1228	3483	2126	3654	3039	2308	2769	1006	1106	1328	1848	2737	2762	1334	3462	1650
AFUA_1G12400	2416	1316	1701	202	169	169	426	431	391	2473	2311	1434	276	254	169	397	341	237	625	524	726	368	256	220	343	340	461	1782	2174	1845	318	315	162	484	463	371
AFUA_1G12410	14660	7560	11378	136	245	124	314	310	385	10710	14084	10543	61	80	86	350	394	294	4292	5653	4881	70	71	58	633	248	333	11033	12588	13665	277	188	104	435	385	379
AFUA_1G12420	766	557	529	29	44	5	41	33	27	553	515	328	13	7	10	31	49	29	239	228	202	12	22	8	54	53	89	207	352	423	19	45	14	28	70	28
AFUA_1G12440	530	259	377	324	344	187	495	347	228	234	172	114	321	353	182	386	228	199	194	156	177	422	257	220	308	257	226	239	283	399	311	411	164	368	347	110
AFUA_1G12450	304	183	215	207	173	204	350	239	160	136	80	61	189	180	202	222	154	94	134	57	113	221	137	208	145	127	89	133	161	258	149	199	203	195	182	95
AFUA_1G12460	165	107	172	286	386	176	187	159	176	93	87	104	196	272	181	114	151	159	205	247	217	262	342	177	127	137	242	181	186	194	431	333	191	131	206	170
AFUA_1G12475	1161	1095	1208	35	43	25	40	14	18	1216	1424	1092	18	17	27	16	13	9	800	970	627	24	32	37	15	29	18	729	877	703	32	24	30	24	23	13
AFUA_1G12480	7	4	1	908	1155	1020	922	766	807	4	6	0	1224	1051	844	835	823	589	10	10	11	1515	808	1013	930	893	574	4	7	15	885	995	756	416	845	402
AFUA_1G12490	249	193	256	2351	2401	1437	2519	2134	4280	128	113	102	1621	1457	1396	2254	2952	2999	223	106	194	2351	1522	1439	3630	2786	2885	200	149	173	1480	1376	1229	1857	2919	1908
AFUA_1G12500	21	8	14	32	29	24	38	30	25	13	4	2	15	27	23	26	31	12	11	10	9	47	28	15	29	51	26	15	10	11	30	13	24	23	32	20
AFUA_1G12510	4	4	8	298	380	110	110	129	266	4	3	0	142	130	93	134	160	136	3	3	5	123	85	94	194	140	136	3	0	3	99	108	77	103	316	128
AFUA_1G12520	116	83	128	478	477	455	923	668	712	65	39	51	635	573	480	814	687	571	183	141	131	688	410	545	752	495	582	72	62	67	557	649	479	829	823	367
AFUA_1G12530	128	109	91	9770	11527	2956	1690	1269	3112	93	71	62	6674	6749	3048	1488	2437	2138	142	53	117	4483	2643	3396	2686	2513	3086	74	69	72	2288	2892	2747	1086	2999	2931
AFUA_1G12540	642	377	587	775	724	964	1019	811	925	219	139	86	1067	1005	959	860	875	713	554	317	493	1526	826	1190	999	656	668	377	278	427	817	933	862	832	796	402
AFUA_1G12550	2290	2063	2962	6164	6387	3975	5253	4076	6186	1638	1703	1522	4828	4700	4713	4108	5351	4666	2103	1226	2058	4859	2960	4784	5838	4478	5120	1860	1890	1924	3308	3398	3762	3088	5702	3236
AFUA_1G12560	3	1	3	156	191	286	179	181	241	2	1	0	871	513	339	121	159	195	4	4	0	526	310	243	128	81	120	2	0	1	332	501	256	156	128	106
AFUA_1G12570	522	373	580	413	367	659	1139	791	745	101	103	129	906	688	626	945	773	552	382	277	346	1138	743	658	861	694	461	259	261	322	851	958	590	898	785	438
AFUA_1G12580	313	97	101	276	284	560	596	549	491	244	134	105	607	557	560	653	540	420	73	64	67	562	320	677	638	417	278	62	67	64	304	573	446	667	549	225
AFUA_1G12590	755	866	1212	3083	2846	1644	742	694	2332	180	258	221	2428	2560	1618	981	1631	2095	646	535	578	2714	1695	2335	1805	1695	2607	385	305	411	986	2032	1647	719	2063	1825
AFUA_1G12600	35	23	29	112	68	96	125	76	88	5	6	5	102	125	110	97	62	69	46	21	44	159	66	102	71	62	69	40	34	25	106	143	79	109	102	44
AFUA_1G12610	1698	2058	2898	7021	8216	7477	7725	4801	8083	1109	1452	2130	7819	8007	8452	4108	5722	7163	4957	2981	4074	10825	8643	10745	5486	13703	9494	3672	2300	2263	6420	7792	8826	6078	12424	9822
AFUA_1G12620	332	325	483	1622	2319	510	1074	719	2082	342	443	398	377	818	447	518	1554	1358	762	292	571	535	541	477	1356	2097	2602	440	271	552	515	530	369	448	2045	2527
AFUA_1G12630	392	268	334	837	1075	1151	1366	867	663	146	159	127	1495	1342	1000	824	596	624	422	286	344	1463	886	1208	784	695	605	209	197	167	1022	1487	856	1121	774	361
AFUA_1G12640	1164	754	971	617	708	532	2032	1606	2251	1495	2037	1246	582	740	576	2067	2287	1839	1429	1659	1637	828	895	643	2001	1705	1982	792	733	1240	1056	905	709	1474	2832	1467
AFUA_1G12650	2907	1704	2855	1176	846	1595	2430	2324	2808	1221	1467	1097	1345	1289	1553	2457	2551	2002	2060	2124	2007	2275	2072	1759	2703	4574	2655	2417	2306	2997	2809	3410	1509	2072	3764	1783
AFUA_1G12660	8705	7538	9331	2451	3010	3468	9858	7470	6130	8021	8485	7060	3099	3037	3504	7346	6692	5393	6790	6157	6532	3830	2848	3806	7116	5390	6412	6310	6928	6093	3936	4039	3124	8174	8006	4479
AFUA_1G12670	614	302	443	952	1164	616	499	440	673	278	179	113	937	797	604	513	620	551	919	553	783	889	633	773	508	263	665	500	333	416	735	940	545	394	667	501
AFUA_1G12680	1468	1034	1560	1461	1603	1646	1925	1527	1497	510	416	303	1713	1555	1685	1545	1384	1144	692	292	618	2169	1221	1808	1864	1135	1250	986	1016	1178	981	1200	1337	1395	1536	850
AFUA_1G12690	112	81	88	260	295	769	476	404	275	77	35	11	569	529	591	360	277	180	62	59	48	980	467	851	280	258	326	71	66	89	385	494	600	361	329	146
AFUA_1G12700	588	359	531	973	905	790	949	844	1131	180	86	69	1018	871	889	1025	1064	868	390	183	298	1423	806	944	1357	932	707	406	398	508	650	904	667	728	1085	315
AFUA_1G12710	105	53	75	70	76	80	34	33	17	90	50	58	63	60	67	21	27	17	50	23	24	77	48	73	22	29	40	48	61	37	39	41	61	20	41	17
AFUA_1G12720	373	256	223	483	555	536	469	393	499	273	162	125	636	574	543	365	412	387	310	292	226	692	415	594	407	289	516	234	243	184	415	623	478	449	435	326
AFUA_1G12730	469	561	1080	1134	879	1450	1003	929	1988	157	194	242	1415	1410	1584	956	1378	1953	1440	935	1278	2014	1174	1991	1464	1406	1507	643	369	273	813	1258	1419	776	2066	972
AFUA_1G12740	1022	958	1214	1557	1455	2007	1060	994	1270	839	552	745	1915	1951	1770	950	1217	1250	1313	1234	1175	2364	1598	2515	996	819	845	801	735	665	1776	2202	1873	1134	1411	838
AFUA_1G12750	447	262	306	679	628	887	512	463	524	205	188	188	1128	931	848	440	466	423	347	401	308	1337	718	1280	426	286	351	156	168	151	694	1146	833	462	541	206
AFUA_1G12760	873	686	902	955	716	1521	1528	1260	1351	472	399	368	1615	1420	1643	1306	1179	1170	829	585	741	2011	1107	1807	1158	855	905	615	626	724	1241	1635	1676	1297	1384	647
AFUA_1G12770	3986	3852	4467	811	1249	1310	1662	1206	1592	3402	3240	2736	910	989	1526	1108	1526	1269	3160	1383	2808	1242	924	1553	1469	1174	1427	3318	3823	3198	1234	1027	1511	771	1683	756
AFUA_1G12780	3267	2741	3257	1298	1875	814	1222	1070	1753	2586	2080	1618	862	964	813	1253	1498	1439	1500	1708	1420	604	436	1129	1322	1756	2002	1665	2123	2234	406	731	719	681	2315	1259
AFUA_1G12790	795	539	749	853	776	1181	1167	1048	1320	280	285	276	1353	1159	1272	1054	1256	897	937	531	883	1908	1018	1356	1155	746	981	536	447	660	1008	1379	1138	797	1023	511
AFUA_1G12800	2182	1566	2047	3364	3427	4399	2118	2005	3770	1473	954	869	4552	4424	4033	2152	2884	3025	1321	923	1192	5115	2825	4981	2446	2227	2456	803	658	1048	2469	3552	4245	1792	3730	1788
AFUA_1G12810	783	618	901	304	413	481	422	338	470	487	484	438	488	497	417	270	356	390	1351	1130	1231	710	412	570	409	213	406	987	811	904	380	474	459	288	336	202
AFUA_1G12820	257	230	257	221	342	410	343	246	168	203	145	117	481	372	377	225	155	160	438	246	428	718	362	500	190	212	140	216	163	162	252	351	310	318	214	82
AFUA_1G12830	403	348	452	26741	40915	40400	934	846	3127	246	218	172	36933	33926	39429	1086	2643	2041	330	249	287	40007	23110	44354	1982	847	4967	268	230	301	20469	21847	35079	528	2369	3001
AFUA_1G12840	16	10	8	28867	40375	46117	272	277	3093	16	7	1	44131	37674	47686	360	2549	1925	10	5	15	42947	26507	53337	1997	362	4083	2	7	9	28737	27893	47557	129	1898	2440
AFUA_1G12850	180	170	126	4025	7519	10699	40	44	38	111	93	65	14852	13476	10058	48	38	33	272	186	251	9783	5097	15440	43	40	133	148	153	185	3695	5967	10165	38	53	189
AFUA_1G12860	5	4	5	50	45	109	46	43	24	1	1	1	178	92	100	32	27	24	2	4	5	141	55	118	22	12	7	1	2	7	23	64	103	13	25	0
AFUA_1G12870	1287	971	1188	844	1007	1219	993	719	881	800	640	647	1523	1442	1200	894	782	739	1354	944	1271	1757	1008	1253	823	626	645	687	618	683	1109	1512	964	675	924	452
AFUA_1G12875	2349	1472	1900	312	338	438	464	468	489	2106	1443	1523	467	447	409	490	512	263	2090	2141	1865	668	431	519	633	584	308	1475	1380	1099	452	659	376	472	461	203
AFUA_1G12880	188	113	142	193	206	239	311	225	240	69	56	75	221	231	178	243	189	172	245	265	219	317	254	213	257	368	181	102	59	66	275	374	143	209	332	135
AFUA_1G12890	1099	1126	1125	13186	12995	14221	4482	4480	8216	707	556	631	22551	19301	15294	4175	6285	9233	1970	1488	1343	23920	13935	19459	5565	5638	6036	558	479	392	12816	19992	16653	4924	10222	4874
AFUA_1G12900	3894	3080	3821	1803	2565	2009	4505	2885	2174	3323	2833	2261	1875	1879	1977	3303	2535	1388	2647	1508	2702	2935	2055	1779	3299	2710	1188	2338	2651	2868	2489	2345	1745	2326	1892	887
AFUA_1G12910	1631	1016	1542	1650	1538	1402	1732	1526	1784	733	640	482	1483	1443	1400	1523	1489	1346	1356	851	1157	2071	1587	1556	2173	2909	1975	1063	873	1336	1763	1966	1416	1126	2299	1186
AFUA_1G12920	3392	2105	2337	1625	1932	2896	5010	4606	3784	2385	1592	1157	6858	5043	2741	5130	4575	3523	1922	1334	2031	9134	5228	3063	3967	2712	3203	1591	1687	1743	6240	7592	2023	4894	3399	1599
AFUA_1G12930	3578	2857	3153	1417	1988	1307	1187	1153	1774	2599	2420	1693	1134	1288	1409	988	1774	1297	1999	819	1648	1582	1145	1612	1562	1106	1900	1769	2192	2171	1125	1234	1272	911	1850	1120
AFUA_1G12940	12674	11075	13741	5586	8289	5381	2960	3883	7814	10599	8992	7666	5424	6014	5864	3456	7166	7368	6022	5104	5898	8131	5232	7765	5100	2569	12086	8546	11822	11172	4387	7271	4655	4142	7818	6248
AFUA_1G12950	4455	2686	4277	1361	1937	1537	968	1014	1344	1668	1280	965	1333	1363	1677	775	1198	1042	1641	915	1536	1502	1032	2010	1014	614	1790	3291	4052	4682	985	1276	1270	754	1290	869
AFUA_1G12960	11595	8292	14105	3301	3305	3569	4274	4000	4845	7264	6904	6586	3593	3412	3771	3445	4385	3652	7541	5664	7323	4590	3034	4012	3983	2867	4167	11761	14028	15227	3276	3694	3501	2893	4554	2796
AFUA_1G12970	3625	3146	4327	1202	1062	513	272	496	1162	2964	3274	2897	908	985	542	401	1051	1144	3174	4980	3035	822	536	598	584	225	1279	4530	5683	4653	577	1203	442	593	1175	1046
AFUA_1G12980	2506	2426	2972	1173	1329	827	453	415	650	1967	2250	2267	626	726	833	333	669	674	1700	1276	1422	821	465	857	485	285	808	2080	2631	2466	465	541	744	295	701	383
AFUA_1G12990	3000	2290	2802	1915	1697	1216	418	423	700	2742	2460	1891	1047	1188	1097	364	716	628	1168	1428	1015	1020	510	1233	413	263	681	1953	2513	2512	562	1055	978	411	611	306
AFUA_1G13000	114	115	159	134	110	138	229	180	219	55	71	95	118	137	137	210	173	155	100	61	57	101	67	161	180	386	228	43	61	71	76	120	111	116	244	152
AFUA_1G13010	1221	963	1614	691	669	898	809	589	984	599	665	684	786	706	784	537	792	642	1065	860	1076	999	583	978	848	815	823	1329	1115	1202	482	602	662	530	705	526
AFUA_1G13020	367	206	348	1026	1029	1114	1160	916	862	78	38	29	1193	1086	1042	871	831	637	753	549	814	1531	952	1309	774	597	590	406	250	442	1200	1349	1046	985	863	446
AFUA_1G13030	168	58	211	158	221	140	325	262	127	7	9	7	148	116	94	203	160	62	2401	1111	1940	112	108	95	196	176	30	1153	376	1085	139	156	90	105	141	34
AFUA_1G13040	115	56	124	191	240	261	594	339	339	14	14	21	181	184	203	328	299	181	2098	536	1562	182	114	229	319	252	87	527	228	519	173	180	175	337	253	87
AFUA_1G13050	3688	3577	5714	4442	4177	3283	3128	2420	3567	1955	2419	2552	1960	2406	3792	2357	3321	3028	12755	6341	11604	1927	1628	3212	2542	2516	3898	9796	6350	6304	3888	2041	3825	1611	3926	3082
AFUA_1G13060	1207	1166	1715	709	676	1303	1546	1322	1772	662	854	953	1275	921	1276	1290	1802	1531	2630	1173	2362	2109	1133	1461	2285	1677	1050	1721	1367	1158	794	1029	1175	947	1495	656
AFUA_1G13070	1368	1567	2052	878	995	494	568	550	1867	451	447	439	571	643	654	752	1349	1342	1206	957	1000	730	382	898	1681	1656	1550	842	669	813	231	506	462	455	1527	788
AFUA_1G13080	24	25	48	106	121	31	39	28	35	2	5	5	42	56	53	58	54	27	109	40	63	40	12	39	51	70	56	53	27	30	30	26	30	10	100	9
AFUA_1G13090	189	143	160	3148	2807	4779	4275	3910	5434	52	41	41	5618	5562	6284	4590	4871	6045	615	262	506	8687	5519	7103	5012	3938	3821	174	119	108	4080	5641	5313	3763	6594	3059
AFUA_1G13100	1528	980	1343	1189	1431	1624	1330	1074	1422	576	424	324	1990	1628	1678	1162	1225	1175	1684	822	1722	2691	1422	1903	1644	1305	1075	1138	989	1260	1067	1531	1364	1267	1329	780
AFUA_1G13110	74	50	71	121	145	148	769	657	331	36	27	33	316	270	191	808	444	316	151	80	114	495	395	205	358	399	246	114	65	109	634	545	165	607	461	222
AFUA_1G13120	1550	1084	1080	312	378	156	1494	1304	1134	916	765	488	198	199	134	1486	1090	943	562	353	332	266	408	184	1218	928	621	385	433	617	473	451	162	1355	1254	530
AFUA_1G13130	1701	1168	1626	735	771	605	1207	787	760	948	853	588	534	564	594	777	739	571	1301	943	1232	615	392	738	685	518	759	905	966	1296	541	676	620	784	822	514
AFUA_1G13140	545	456	847	4205	4696	3657	5164	3928	5201	212	198	234	4020	3896	3869	3954	4836	3986	800	291	695	3844	1952	3944	4577	4750	3554	387	381	353	2047	2256	2879	2430	4298	2561
AFUA_1G13150	174	125	179	998	913	986	1427	839	707	82	74	50	1055	1228	1077	602	611	454	311	195	240	1132	657	1414	620	1014	504	114	76	119	654	810	963	566	650	348
AFUA_1G13160	1870	1984	3100	1987	2897	1259	3381	2993	3268	1044	1097	788	1846	1799	1269	3193	3367	2666	2782	2079	2445	1917	1495	1734	3743	3939	2533	1695	1630	1593	1509	2064	1101	2281	4023	1944
AFUA_1G13170	79	65	93	646	698	656	438	403	478	43	40	21	574	634	586	262	379	367	60	46	53	776	598	905	367	221	684	55	22	46	450	530	530	383	340	346
AFUA_1G13180	193	139	179	381	347	323	363	256	408	68	36	27	473	408	327	293	361	310	120	59	69	426	211	465	334	241	265	74	104	144	237	286	357	246	438	111
AFUA_1G13190	582	448	549	551	603	604	1032	804	1080	264	210	223	855	716	545	860	809	885	573	348	577	766	458	609	951	553	850	369	386	332	490	653	417	595	862	496
AFUA_1G13195	1089	808	997	1491	1372	1998	931	927	1762	550	445	415	2190	2087	1777	1093	1472	1512	695	742	650	2357	1571	2685	1178	787	1278	504	610	644	1465	2338	1807	1226	1745	765
AFUA_1G13200	832	704	1060	270	336	580	641	804	1821	316	325	295	385	362	681	992	1537	1473	1007	589	1009	734	416	819	1842	1110	1057	739	665	782	275	347	592	651	1619	637
AFUA_1G13210	3825	2117	3100	222	371	542	487	678	574	2426	1820	1572	852	676	546	722	802	569	2766	2057	3016	897	552	761	739	229	741	3690	4693	3462	549	663	580	850	589	335
AFUA_1G13220	253	189	290	241	326	318	255	311	306	71	95	92	506	437	272	335	269	182	382	282	284	329	193	316	342	128	287	328	373	457	303	443	288	300	221	195
AFUA_1G13230	130	73	123	444	371	293	200	199	258	16	26	15	303	420	270	259	263	173	336	219	281	310	225	204	319	337	238	248	182	283	308	379	193	153	317	122
AFUA_1G13240	360	162	250	395	636	340	363	270	231	120	149	72	614	640	387	326	219	202	223	174	147	607	417	488	253	205	285	226	233	301	481	635	329	349	318	207
AFUA_1G13250	2641	3066	3590	1470	2550	2421	3632	3393	2215	2634	2980	3275	1641	1730	2747	2478	2190	1536	2002	1115	2207	4239	3140	3106	3268	1604	2822	3692	5069	3159	2729	2534	2199	2835	2946	1333
AFUA_1G13260	1911	1163	1691	2013	2142	2729	1638	1211	1946	1248	928	786	2590	2533	2614	1196	1610	1704	1607	1124	1264	3027	1792	3418	1236	1373	1311	1191	1138	1515	1817	2570	2728	1219	2030	922
AFUA_1G13270	790	453	487	454	543	581	1686	1786	1448	529	444	310	800	772	493	1669	1636	1320	327	285	299	1032	700	783	1572	1490	1435	254	304	448	1045	1336	503	1825	2117	838
AFUA_1G13280	1334	965	1174	2826	4455	2200	1230	1215	1470	834	575	453	3237	2661	2325	1493	1517	1272	519	517	533	3678	1794	2880	1309	615	2089	583	731	943	1712	2943	2174	1040	1690	1441
AFUA_1G13290	2067	1571	2111	814	946	678	1238	905	981	1655	1403	1321	833	891	834	891	928	677	1573	1507	1680	939	659	998	1102	687	846	1490	1751	1442	689	848	747	983	1003	407
AFUA_1G13300	2748	2081	2874	2839	4231	1728	1303	1128	1862	1616	1768	1672	1305	2167	2036	1087	1668	1661	3277	2698	3281	1567	1556	1907	1308	1162	2332	2375	2235	2555	2107	1616	1888	866	2125	2409
AFUA_1G13310	685	527	967	2900	2868	1856	1673	1468	2769	383	335	350	1171	1497	2187	1341	2374	2146	723	372	581	1257	868	2105	1956	1803	2948	605	561	711	843	1001	1409	957	2372	2193
AFUA_1G13320	289	186	292	2376	3010	1712	647	669	1887	70	78	95	2156	2448	1935	832	1290	2017	161	117	105	2021	2224	2008	951	914	2039	128	138	191	3303	2822	2428	640	2473	1566
AFUA_1G13330	1847	1091	1664	2750	2734	3837	2991	2699	3106	837	677	596	3890	3589	4099	2811	2607	2684	1035	756	914	5175	3421	4466	2020	1509	3201	918	937	1258	4514	4756	3819	2513	3257	2879
AFUA_1G13340	2555	1801	2476	1860	2233	2194	7830	5600	5372	1559	1380	1082	1814	1983	2538	6025	5476	4232	1835	1415	1927	1695	1146	2063	5274	4836	4446	1862	1859	2396	1584	2076	1655	3110	5369	3302
AFUA_1G13350	1593	1440	1691	1065	1646	701	2172	1505	1265	1951	1333	1125	1299	1304	580	1541	1735	954	1323	1045	1192	1640	988	648	2146	1632	1105	1136	1276	1385	1332	1573	545	2457	1813	451
AFUA_1G13360	1111	1251	1478	372	434	193	449	320	332	1259	1426	1766	230	246	158	299	285	237	1236	1149	1099	317	225	131	281	225	419	1208	1451	1039	379	381	196	326	374	213
AFUA_1G13370	1396	1360	1714	273	317	304	715	653	745	1514	1679	2068	539	417	285	594	551	627	1940	1529	1985	568	399	256	638	365	579	1471	1874	1184	733	561	316	635	658	571
AFUA_1G13380	1214	1144	1182	224	239	486	639	546	417	1410	1565	1405	458	302	380	532	525	304	964	1114	885	621	360	618	651	362	363	627	760	621	385	469	394	641	409	182
AFUA_1G13390	1106	531	910	815	737	1138	633	557	586	375	193	131	1369	1231	1211	538	517	513	594	469	491	1731	1071	1320	563	382	429	524	394	632	897	1268	1082	661	599	314
AFUA_1G13400	619	953	1174	2047	2144	4233	1865	1294	1299	257	374	505	2767	2679	4750	982	1365	968	1487	964	999	6119	5949	6088	1155	1294	1810	835	904	592	10361	6672	7088	2468	1527	989
AFUA_1G13410	1584	1169	1476	262	209	331	972	692	477	1326	1094	883	280	260	343	812	510	315	2580	1888	1909	311	270	380	697	530	325	1358	1088	1227	318	428	293	592	462	165
AFUA_1G13420	1625	1397	1624	974	964	1291	2673	1859	1669	1740	1712	1359	1877	1633	1350	2060	1556	1290	1975	1081	1766	2171	1575	1512	2056	1406	900	1120	1143	1260	1964	2605	1345	1878	1556	760
AFUA_1G13430	1885	1514	1801	1364	1964	1294	1692	1096	813	1349	1395	1142	1609	1533	1294	712	781	678	1196	1050	1095	2080	1607	1704	1081	1114	1009	914	996	1321	2203	2256	1547	1345	1006	745
AFUA_1G13440	174	75	107	727	822	317	339	259	508	55	80	36	265	305	382	230	369	369	112	49	88	396	314	570	374	244	579	72	65	88	337	268	341	275	453	297
AFUA_1G13450	1662	1390	2365	3197	2236	2085	2190	1727	3505	910	870	983	2092	1902	2855	2088	3133	2637	6255	2991	6045	3173	1813	2809	3046	1911	1959	3062	2154	1374	1327	1474	2293	1436	2781	1140
AFUA_1G13460	120	93	124	307	324	406	401	376	421	71	82	58	428	332	383	468	448	302	253	164	256	491	261	463	603	385	245	170	104	115	341	414	306	312	350	172
AFUA_1G13470	2467	2437	3279	2295	2513	2799	2196	1892	2815	1215	1210	1516	2928	2937	2760	2062	2333	2634	3598	2854	3122	4129	2604	3638	2318	1946	2714	1952	1557	1708	2776	3349	2833	2358	2706	2099
AFUA_1G13480	2575	2124	2611	4083	4008	6068	3115	2924	4776	1700	1472	1462	5720	5766	5402	3008	3843	4305	2557	2959	2054	6906	4764	7530	3063	3217	3652	1224	1028	1156	5463	6609	6314	3717	5431	2895
AFUA_1G13490	2750	1878	2482	3603	3436	6746	3991	3896	3964	1393	910	765	7329	5809	6209	4594	4481	3219	1875	1239	1371	6758	3526	7737	3422	2955	2589	1193	1108	1309	3691	6020	6119	3571	5439	2063
AFUA_1G13500	3656	2915	3838	11547	11979	17032	6615	6672	8440	3023	3319	2942	22298	17791	17825	7749	7832	8440	2555	1958	2385	23290	12352	19650	5398	3947	6881	2287	2683	2950	12151	18421	17001	4875	9551	7261
AFUA_1G13510	15861	14910	17744	2683	6544	2071	5445	5226	10694	14037	13764	12104	1779	2071	2359	5391	8162	8215	7623	6187	8270	2718	2034	3050	9655	4704	11648	12945	17667	16829	1828	2208	2099	3812	8684	6264
AFUA_1G13520	5294	3913	5110	575	782	488	365	352	379	2788	2331	2047	666	665	555	353	363	195	2228	2412	2204	802	573	639	472	257	416	3703	4886	5176	768	1094	458	412	440	126
AFUA_1G13530	30759	25686	29349	366	487	132	109	144	404	33782	31622	22885	323	403	200	168	375	456	6966	9884	6561	423	288	179	233	55	783	16582	26447	28579	446	752	172	203	451	314
AFUA_1G13540	2820	1820	2277	671	895	755	986	695	738	883	721	537	875	792	821	776	890	547	1599	1210	1349	909	528	939	1001	708	628	1929	2044	2520	531	812	700	688	933	294
AFUA_1G13550	33944	29218	36344	2377	3567	1647	138	380	1155	30078	29347	32638	5020	4376	1694	366	1165	1290	31779	52309	37519	5208	3161	2421	487	133	1886	44358	48887	36928	4584	8138	1589	672	1491	1412
AFUA_1G13560	7015	6415	9852	312	283	95	73	106	258	5791	7075	9515	429	318	95	161	124	347	9885	16497	12497	549	342	124	147	112	402	15089	15712	10012	305	724	80	145	167	190
AFUA_1G13570	1852	2475	3995	2791	2547	2133	1477	1389	3576	378	441	505	2349	2308	2354	1783	2846	2982	1720	1465	1544	2652	1551	2707	3282	3791	2707	1105	906	901	958	1955	2145	1203	3822	1565
AFUA_1G13580	1110	678	1022	735	503	1158	634	502	810	220	185	166	1013	863	970	495	617	498	1230	880	1024	1518	794	1367	785	493	499	849	725	823	625	910	992	495	634	247
AFUA_1G13590	2916	2386	3170	1814	2166	1936	1178	1129	1887	2043	2267	2196	1644	1562	1864	1174	1789	1740	1771	1264	1632	2327	1492	2186	1553	898	2036	1968	2340	2676	1385	1678	1718	898	1706	1315
AFUA_1G13600	274	138	135	320	405	275	536	353	347	181	117	93	319	346	289	305	351	279	191	92	151	438	219	372	359	362	405	130	104	86	309	324	287	260	395	249
AFUA_1G13610	12	3	4	927	898	779	963	703	700	1	0	1	1214	940	826	597	693	454	13	14	2	1356	670	908	918	500	502	2	1	3	726	762	825	576	607	330
AFUA_1G13620	1132	859	1451	1239	1517	1144	1055	1178	1829	513	593	660	1362	1274	1465	1391	1710	1558	925	687	1049	1568	1056	1404	1542	841	1585	1173	1090	1508	1052	1481	1188	655	1783	1171
AFUA_1G13630	1723	1455	1490	428	557	545	913	585	593	1393	1256	915	533	493	529	679	618	509	424	506	347	546	479	546	645	1396	606	897	1179	1164	654	695	419	719	699	511
AFUA_1G13640	8	7	2	9	28	33	35	27	24	6	1	2	17	10	28	23	24	18	2	2	1	27	16	21	20	16	31	8	7	3	24	21	33	32	27	20
AFUA_1G13650	20	25	20	12	18	13	15	14	12	23	14	13	3	16	9	13	3	8	20	5	6	12	9	6	15	12	6	12	13	12	8	2	9	25	9	2
AFUA_1G13660	1528	1284	1498	540	552	523	1463	755	1872	868	848	802	515	538	322	962	1156	1106	477	509	448	672	450	310	2275	596	1092	908	1294	1154	572	552	479	1316	862	4093
AFUA_1G13670	657	494	577	1793	1986	1566	451	282	532	389	404	281	4546	4527	909	320	419	268	409	439	289	5051	2564	1102	474	201	411	326	371	356	2631	4200	760	323	340	410
AFUA_1G13680	26	26	37	249	335	167	99	83	144	15	19	8	294	354	122	124	89	165	40	38	25	373	247	128	94	72	187	40	19	40	229	310	83	50	110	144
AFUA_1G13690	2015	1491	1923	677	924	1376	2431	1919	1691	1190	1080	1017	1127	994	1187	1693	1715	1443	1610	812	1412	1714	1032	1345	2145	1596	913	1205	1350	1338	1240	1358	1050	1600	1276	647
AFUA_1G13700	1475	1210	1764	764	803	1191	1156	979	1238	676	783	870	1074	867	1142	933	1174	1187	1623	1162	1417	1539	789	1434	1274	948	954	1708	1904	1690	763	986	956	768	1255	619
AFUA_1G13710	2037	1739	2401	3698	3621	4834	3585	3622	5438	1235	1185	996	4870	4231	5158	4356	5090	4516	2487	1890	2369	6212	3118	5605	5303	4854	3431	1625	1522	1969	2099	3482	4125	2258	6064	1755
AFUA_1G13720	1455	910	1242	1459	1624	1769	1258	1017	1291	609	486	426	1648	1371	1597	1048	1173	910	852	844	858	2432	1389	2068	1262	885	1031	774	761	1020	1265	1567	1583	955	1144	587
AFUA_1G13730	2010	1697	2383	2495	2138	1641	1881	2028	4295	1166	955	764	1763	1687	1956	2427	3645	3185	1934	1346	1913	2307	1215	2137	4071	3797	3566	1403	1282	1666	990	1714	1245	976	3957	1871
AFUA_1G13740	641	486	697	2930	2863	4312	3133	2817	4254	189	159	145	4663	4256	4196	2800	3813	3522	546	290	453	6466	3764	4993	4463	3089	2698	358	350	471	2840	3738	4544	2150	3853	1932
AFUA_1G13750	12293	11027	15153	36367	35825	14589	7787	17518	55947	13162	14714	16354	2275	4985	18770	21731	53820	45100	15555	7241	17011	6091	7937	12569	40518	53682	53142	21270	25425	15983	9723	4309	11734	1435	61641	23947
AFUA_1G13760	1238	897	1033	748	843	702	1125	1060	914	1013	970	591	667	611	691	1024	993	666	485	374	368	703	477	631	821	492	805	531	555	733	609	668	491	820	1066	548
AFUA_1G13780	385	255	329	24967	32733	28060	10655	10813	22339	152	105	153	33514	35778	28633	10410	17130	24637	841	513	748	40996	26610	34786	10175	15153	13977	317	224	217	28923	40239	27587	13017	24765	15133
AFUA_1G13790	20956	18267	24176	40397	49900	33635	29072	27613	46927	12039	11566	12897	47446	51118	41371	29239	36369	48631	23212	20064	20529	66740	47924	55982	37047	30238	48511	16700	16318	14026	47791	60160	38007	38802	56125	33651
AFUA_1G13800	1514	1707	2141	2945	4159	896	457	1116	10021	1953	2097	2773	525	1034	958	1703	9282	8361	774	475	730	754	772	952	10354	22353	14774	1133	1526	1498	489	476	911	356	13623	7602
AFUA_1G13810	38	25	22	14	43	7	9	7	13	19	27	12	6	9	7	10	11	6	18	10	24	15	10	10	1	35	36	29	24	26	16	12	6	14	50	0
AFUA_1G13820	1508	1304	1615	54	42	12	13	8	15	1376	1541	1453	11	6	17	8	11	9	917	1143	760	4	11	19	12	6	16	1219	1551	1153	22	9	17	1	14	9
AFUA_1G13830	0	0	0	269	251	58	437	252	167	0	0	0	448	407	105	188	145	73	0	1	1	256	265	174	234	246	207	2	2	0	313	334	64	313	179	102
AFUA_1G13835	0	0	0	3	0	0	0	0	0	0	0	0	0	2	0	0	0	0	0	0	0	0	0	0	0	0	0	0	0	0	0	0	1	0	0	0
AFUA_1G13840	576	531	810	478	485	334	1031	1053	2485	177	110	124	329	464	365	1414	2232	1866	431	229	359	296	164	375	1533	1887	1825	355	347	539	182	266	254	466	2437	928
AFUA_1G13850	2018	1695	2368	453	390	647	577	654	1002	1039	1166	939	654	540	641	658	857	896	1490	1069	1296	718	413	661	734	575	736	2005	2307	2266	424	573	437	410	990	418
AFUA_1G13860	186	162	180	203	204	151	249	221	204	99	115	124	315	230	154	254	174	102	141	114	122	220	133	141	196	218	116	117	121	133	206	324	106	264	168	92
AFUA_1G13870	442	264	353	384	425	367	502	360	447	147	108	83	532	492	365	375	438	434	408	175	346	535	241	517	489	311	368	267	279	260	289	417	274	302	339	129
AFUA_1G13880	2002	2423	3567	869	671	570	620	637	1675	1012	1506	1650	675	665	672	797	1379	1185	2490	1781	2286	728	374	796	1350	1224	1225	2391	2524	1992	249	510	442	258	1264	630
AFUA_1G13890	509	684	879	816	816	1040	1356	1132	1657	284	378	415	927	939	1162	1144	1543	1544	1834	1371	1706	1365	737	1360	1463	1323	1128	788	659	485	611	950	886	741	1493	768
AFUA_1G13900	414	459	685	1316	1324	1515	970	734	1566	193	178	144	1535	1392	1734	882	1484	1407	947	452	845	1947	1042	2055	2027	1931	950	413	373	403	613	1068	1398	566	1509	604
AFUA_1G13910	4638	3508	4307	1305	1462	1019	1791	1505	2062	3093	3101	2416	987	925	967	1599	1977	1499	3237	2607	3391	1318	927	1067	2024	1599	1750	3435	4015	3816	868	1095	842	1057	1931	1011
AFUA_1G13920	15574	12352	12845	1253	1525	1305	1886	1485	1354	17194	14786	10366	1361	1402	1585	1707	1426	1313	4655	3198	4623	1844	1249	1631	1365	1172	1832	7011	9758	9075	1049	1247	1190	1329	1855	1022
AFUA_1G13930	274	195	227	707	731	1463	1195	1152	1054	142	190	161	1744	1313	1598	1294	1182	1033	496	475	340	2065	1388	1803	1061	698	724	197	192	176	1438	1867	1521	1233	1294	665
AFUA_1G13940	0	3	3	403	373	503	562	254	250	2	2	0	585	406	481	197	222	86	17	6	8	603	259	522	299	315	134	2	5	8	421	424	665	279	157	115
AFUA_1G13950	82	39	58	120	117	54	252	206	280	39	34	22	105	87	73	218	214	194	35	16	24	158	111	87	190	88	361	17	26	22	166	144	72	139	234	165
AFUA_1G13960	282	175	315	717	724	1103	1318	1074	1022	130	151	105	1316	1220	1156	1269	1099	863	381	367	373	1632	1146	1320	989	763	820	228	141	206	1420	1647	931	960	1027	775
AFUA_1G13970	39	26	35	2994	3425	3069	3829	3927	4804	25	11	13	1411	1688	3414	4377	4696	3800	32	10	13	1415	1009	3204	4567	3038	6636	9	13	25	1382	1193	2361	1372	4961	3879
AFUA_1G13980	136	86	107	2339	2336	2552	2200	2220	2816	124	67	63	1231	1333	3017	2764	2888	1971	38	28	15	1297	859	2614	2637	1390	1895	54	59	60	976	1153	1947	951	3098	703
AFUA_1G13990	583	515	677	3850	4784	5008	4805	4028	5217	341	344	265	2844	3288	6124	3965	4977	4175	859	576	752	4298	2513	6551	5153	3912	5488	790	862	892	2200	2869	4082	3932	5370	2620
AFUA_1G14000	236	135	150	229	362	431	664	692	382	128	109	77	68	100	439	541	498	228	129	76	86	90	56	448	658	214	459	92	102	127	61	52	258	87	452	156
AFUA_1G14010	4567	2585	3134	1191	1379	1240	1913	1512	1236	3211	2197	2010	1098	1112	1214	1517	1434	745	2877	2298	2435	999	634	1546	1349	969	1077	2993	2856	3381	736	1035	956	1296	1408	457
AFUA_1G14020	1416	1071	1280	862	900	1012	1071	845	994	855	846	619	1248	1049	1100	941	862	735	1495	1233	1161	1223	826	1261	1036	790	915	858	666	863	776	1167	818	697	1094	622
AFUA_1G14030	2981	2042	2850	911	1007	906	1253	1031	1036	1697	1468	1116	835	819	951	1065	1033	779	2013	1824	1966	885	619	1161	837	707	1081	2225	2410	2517	664	806	748	844	1065	559
AFUA_1G14040	10785	7779	10084	246	352	97	119	182	634	10037	8848	8463	524	520	89	235	567	765	6419	10356	7605	627	320	115	272	50	696	13280	17517	14939	381	1044	70	284	430	288
AFUA_1G14050	938	624	812	714	763	366	665	602	436	615	577	493	265	293	382	395	473	379	632	565	597	226	141	276	309	286	409	603	590	698	285	277	338	375	614	361
AFUA_1G14060	5727	5196	7554	1458	1626	1160	2085	1612	1584	6033	7232	6493	611	927	1051	1520	1508	1037	6578	8464	6500	501	316	1184	1110	1005	1652	6866	7705	8204	490	573	967	901	1527	1257
AFUA_1G14070	1756	994	1731	1191	1465	1199	835	608	926	844	664	497	1497	1367	1269	622	696	747	1208	952	1239	1680	941	1288	626	458	666	1848	1791	2126	792	1182	1153	466	834	407
AFUA_1G14072	1	0	0	0	0	0	3	0	5	0	0	0	4	2	0	0	1	0	1	0	0	0	2	4	0	2	0	0	0	0	0	0	4	0	0	0
AFUA_1G14074	2	6	4	11	7	3	8	0	2	0	2	2	2	0	1	1	1	0	3	2	5	2	5	3	1	2	0	6	3	8	1	0	2	3	1	0
AFUA_1G14076	1	2	3	1	13	2	2	0	3	0	0	0	3	2	0	4	1	0	1	3	1	2	0	2	0	1	0	0	0	0	0	1	0	1	6	0
AFUA_1G14078	18	20	30	23	21	23	43	36	40	2	5	2	6	12	12	37	45	50	10	5	12	10	14	29	27	34	39	10	28	7	4	10	30	42	43	16
AFUA_1G14082	8	8	4	0	11	0	0	6	0	3	1	3	1	2	0	5	5	0	3	3	1	5	1	2	1	1	0	3	3	10	0	6	1	0	2	2
AFUA_1G14080	867	438	684	832	668	554	1446	1083	1069	986	756	564	700	635	633	935	948	806	619	381	701	819	664	802	1138	730	1232	662	600	579	831	850	388	952	963	545
AFUA_1G14090	554	359	581	1625	1599	3048	2091	1986	2740	202	175	167	3815	3679	2971	2661	2607	2769	765	475	600	4775	3264	3488	2140	1695	2172	362	285	307	3211	3656	3271	1567	3060	1551
AFUA_1G14100	989	1052	1450	1329	1164	1500	1118	1123	1785	618	630	611	1494	1283	1519	1220	1737	1498	1763	1108	1467	1836	1059	1930	1539	1216	1571	871	764	559	844	1276	1236	837	1686	1019
AFUA_1G14110	649	679	944	751	549	750	678	590	1123	180	222	218	815	683	832	619	776	816	837	463	823	985	538	923	906	798	622	475	333	319	368	653	741	486	1014	334
AFUA_1G14120	679	795	995	2825	2446	2860	1215	1112	2562	162	126	145	3279	3071	3017	1333	2047	2314	371	206	340	4257	2379	3666	2048	1625	2047	319	279	327	1680	2454	3003	905	2421	1489
AFUA_1G14130	7	4	7	96	60	78	103	77	65	4	0	0	115	88	92	61	67	64	3	0	3	110	57	97	58	53	39	3	3	7	90	111	66	90	94	36
AFUA_1G14140	67	55	33	166	192	99	72	80	71	31	14	41	132	138	93	82	89	52	18	8	28	77	59	78	45	37	116	21	23	20	76	121	77	59	85	42
AFUA_1G14150	2315	2135	2174	6514	4899	2676	4526	4553	6095	1657	1562	1264	1968	2729	2967	4602	5776	5459	2022	1394	1962	2347	2360	3028	3242	3816	7265	1640	1416	1256	2373	2560	2593	3039	7292	7102
AFUA_1G14160	191	143	161	721	642	487	1024	736	785	109	146	153	598	564	414	880	750	727	253	255	255	613	524	724	639	370	1021	126	111	136	705	655	648	887	860	883
AFUA_1G14170	197	169	196	351	343	236	194	198	127	143	98	82	516	420	240	179	123	111	137	97	113	505	322	253	162	103	111	142	106	137	334	503	205	183	174	110
AFUA_1G14180	954	923	1287	1557	1279	1341	756	722	1599	440	339	413	1749	1618	1516	911	1368	1385	1053	798	1001	2263	1052	1739	1573	1063	898	749	495	609	790	1349	1308	585	1285	537
AFUA_1G14190	70	83	64	91	127	70	52	35	53	4	22	16	164	116	56	45	45	29	56	56	31	160	57	88	38	33	39	14	16	37	80	137	61	48	68	1
AFUA_1G14200	1836	1866	2325	7714	7299	8056	4801	4264	7978	975	933	875	9954	10699	8912	4123	5834	8172	1675	1250	1528	12235	8595	10611	5226	3924	6758	870	727	857	9153	9235	10001	4806	8736	5769
AFUA_1G14210	252	153	158	112	124	125	362	322	254	200	138	131	220	181	160	311	270	208	343	300	304	174	131	139	346	344	198	134	145	132	199	268	123	324	326	125
AFUA_1G14220	1937	3066	4239	4595	4395	3471	2328	2044	5404	613	653	859	3917	3929	3976	2711	4526	4633	1752	1066	1543	4393	2654	4879	4527	5258	4607	1256	926	1018	1335	2944	3790	1633	5618	2783
AFUA_1G14230	0	0	0	569	764	114	275	286	430	0	0	1	373	469	181	161	207	313	4	1	0	250	181	132	139	168	321	0	0	2	267	410	38	54	204	217
AFUA_1G14235	0	0	0	0	1	0	2	0	0	0	0	0	0	0	0	0	0	0	0	0	0	2	0	0	0	0	0	0	0	0	1	0	0	0	1	0
AFUA_1G14240	420	227	313	916	1011	850	1072	732	780	190	149	92	1150	968	837	639	715	668	507	293	472	1402	762	1054	793	404	636	216	200	274	899	1144	881	642	698	442
AFUA_1G14250	811	837	859	602	638	465	643	547	591	524	509	428	511	575	396	543	600	412	537	302	460	669	496	500	601	460	501	375	503	386	461	620	315	422	557	266
AFUA_1G14260	982	602	654	1239	1292	1217	1005	838	925	510	338	250	1224	1156	1143	790	675	661	647	395	727	1671	940	1330	733	411	923	331	322	333	926	1309	965	652	758	561
AFUA_1G14270	1942	964	1234	1197	1771	877	1158	940	913	1113	727	422	1118	973	834	1157	1103	576	916	764	883	988	771	952	960	895	860	677	536	990	1154	1312	719	1023	1315	411
AFUA_1G14280	2336	2024	2766	2296	2953	1707	2506	1678	2678	1386	1251	969	1532	2011	2275	1479	1818	3199	1798	1539	1749	2640	2679	3407	2434	2377	4930	1427	1316	1494	1902	1869	2174	2375	4110	3653
AFUA_1G14290	1165	1038	1130	1433	1018	1183	1170	979	1230	693	636	519	1337	1192	1391	999	1043	1287	728	544	587	1574	1061	1634	894	1393	758	872	783	794	1074	1571	1280	876	1767	605
AFUA_1G14300	5667	4528	5398	1659	1771	1560	2300	2192	4988	3535	3323	3802	1705	2146	1931	2911	4110	5167	5500	4366	4601	2286	1389	1710	3142	1702	5779	5096	5142	4355	2259	2547	1586	1852	4065	5647
AFUA_1G14310	6598	4030	5444	1580	1933	1284	1626	1267	1454	4804	3947	3064	1577	1231	1145	1439	1631	1181	2376	1999	2413	2257	1315	1599	1602	1029	1184	2849	3143	3452	1367	1589	1138	1476	1511	471
AFUA_1G14320	570	340	586	858	956	982	1342	962	1241	213	214	174	1145	1084	1073	914	1060	1296	562	521	614	1418	777	1343	1362	1617	1277	436	339	500	849	1104	1055	1587	2390	1214
AFUA_1G14330	141	143	139	7736	6901	4114	10390	6243	14823	166	301	224	1464	2369	3298	5995	11902	13211	229	51	155	2050	1615	2901	18763	48780	21966	142	94	96	1546	1319	2258	3328	26045	19042
AFUA_1G14340	363	283	347	2265	2311	1314	1307	1078	2817	289	206	202	1402	1404	1492	1528	2550	2628	267	216	234	2008	1370	1675	2952	1072	2142	194	176	219	1161	1406	1143	1209	2616	1131
AFUA_1G14350	963	566	559	407	415	361	878	687	258	805	518	297	361	396	360	848	347	221	235	227	218	509	340	368	467	351	180	308	275	387	574	536	310	846	346	132
AFUA_1G14360	543	402	579	165	217	289	445	329	248	440	378	239	243	185	264	285	221	204	255	106	295	326	214	233	252	193	218	308	327	380	227	197	202	249	269	90
AFUA_1G14380	600	360	365	223	248	224	446	381	273	352	301	228	325	306	232	476	237	205	176	193	165	317	191	271	266	207	198	204	234	235	362	435	191	453	251	118
AFUA_1G14390	67	20	24	88	55	158	662	496	155	20	12	7	172	146	169	706	177	104	43	22	25	261	183	201	316	256	67	6	16	14	466	369	147	618	149	75
AFUA_1G14400	622	405	394	347	491	420	423	311	213	621	428	413	549	530	483	454	246	195	514	365	377	561	299	494	254	163	203	250	189	230	546	525	441	383	266	191
AFUA_1G14410	4023	3494	4039	11190	9392	13274	3856	3911	6332	4146	3109	2999	19996	17520	14802	3660	5269	6724	4246	4090	3690	22630	12369	20926	4339	3353	3663	2026	1888	1533	10148	18089	17339	4924	7883	2593
AFUA_1G14420	877	541	885	3747	3102	2085	4872	4124	4380	344	372	285	1420	1924	2204	4065	4417	3268	628	497	501	1930	1575	2252	3192	3041	3173	472	492	565	1691	1896	1757	2787	3548	2683
AFUA_1G14430	93	53	35	330	333	183	533	389	396	35	40	22	371	294	202	442	384	254	70	65	62	419	272	236	361	340	201	58	56	55	364	591	237	295	472	219
AFUA_1G14440	605	698	965	1525	1042	1088	1573	1472	2035	213	209	141	707	847	1221	1587	1740	1966	837	631	702	787	512	1129	1427	1087	1850	317	276	622	535	706	804	618	2053	1664
AFUA_1G14450	35	33	43	2163	2733	1699	470	539	606	20	11	20	3395	3565	1102	598	535	522	70	34	64	3867	2010	1383	454	360	357	76	40	116	1844	2762	918	206	629	190
AFUA_1G14460	1638	1105	1236	500	816	328	1204	712	415	895	887	468	516	507	415	819	582	370	553	374	571	590	471	471	754	756	437	859	910	1109	503	632	295	839	664	121
AFUA_1G14480	327	213	338	113	163	53	74	51	41	123	94	97	67	53	79	50	42	37	194	129	251	95	63	111	78	58	66	186	159	161	58	43	46	61	72	31
AFUA_1G14490	443	402	435	1516	2104	747	1474	1331	1455	712	604	377	787	1104	823	1508	1422	1302	78	72	62	1082	695	1011	1555	1341	1837	120	221	216	849	932	789	1345	2265	798
AFUA_1G14500	544	448	464	5860	6505	3131	2215	2244	4420	590	557	499	2883	3585	3027	2448	3618	3486	264	214	291	4188	2650	3637	3332	3207	4529	312	340	378	2226	2966	2553	1617	3892	3424
AFUA_1G14510	469	526	436	255	254	354	338	261	388	433	658	499	410	260	301	326	366	284	261	213	221	511	261	405	515	280	228	251	332	420	295	295	326	274	348	93
AFUA_1G14520	395	417	632	152	152	56	222	175	436	262	524	705	157	209	51	193	254	310	650	957	566	338	264	73	562	261	247	768	823	659	327	324	49	362	354	145
AFUA_1G14530	34	55	57	111	145	210	439	328	380	11	37	28	267	211	184	450	357	283	37	33	46	380	313	239	346	198	372	26	42	76	522	489	198	342	366	225
AFUA_1G14540	118	105	98	189	187	237	627	616	497	88	121	111	377	300	236	678	457	468	62	88	73	420	281	284	567	947	499	52	77	62	532	501	232	626	737	412
AFUA_1G14550	59	71	39	105	130	89	152	115	82	69	98	100	65	72	62	117	67	32	138	153	111	86	64	53	70	144	70	35	32	26	85	105	61	93	79	53
AFUA_1G14560	163	120	115	432	637	1877	13351	9353	3897	160	114	105	1760	1576	1728	9758	4873	3275	93	53	70	2939	1771	2134	9346	6561	790	79	92	86	2976	3992	1749	11723	3771	791
AFUA_1G14570	153	125	187	4019	5779	3380	6822	6058	6619	29	54	47	4416	4287	3474	7757	6855	5342	185	142	151	5025	2621	4156	7260	4460	6626	103	93	121	2439	3887	2598	5061	6731	4026
AFUA_1G14580	732	893	1185	752	779	604	533	471	1450	143	140	136	541	563	664	690	1219	1046	881	656	686	650	349	1039	1244	1205	1352	440	316	403	237	450	598	261	1348	703
AFUA_1G14590	734	569	728	572	582	492	411	396	604	318	307	212	560	697	561	430	585	509	915	775	690	701	479	748	466	349	663	507	406	426	545	639	557	399	612	515
AFUA_1G14600	481	353	609	676	562	598	426	343	618	254	255	286	633	589	521	493	533	511	982	783	851	564	313	773	498	297	670	357	293	402	321	590	465	301	624	535
AFUA_1G14610	3445	2580	3346	5908	8482	2053	3668	3359	4326	2710	1973	1796	3230	3562	2247	3313	3992	2795	1804	1199	1689	3265	2629	2429	3963	5395	4648	2019	2426	2556	2933	2868	2249	2021	5050	2532
AFUA_1G14620	2701	2447	3729	2026	2124	2042	1872	1560	2095	1520	1933	2641	1946	1871	2019	1587	1989	1632	6592	4469	6227	2875	1870	2209	2234	1759	1630	4462	3418	3019	1658	1947	1740	1050	2053	1174
AFUA_1G14630	324	196	301	300	384	267	236	196	246	122	93	58	411	368	231	231	204	198	166	98	133	429	306	361	213	246	215	133	133	138	251	366	220	201	267	141
AFUA_1G14640	687	928	1438	948	912	515	987	870	1550	298	373	593	576	612	604	886	1319	1124	983	1085	697	663	480	902	1517	2054	1477	670	554	559	244	520	476	581	1611	909
AFUA_1G14645	0	0	0	3	2	6	2	2	9	0	0	3	3	14	0	0	14	4	0	0	0	1	3	0	0	5	0	1	0	0	1	2	0	0	6	2
AFUA_1G14650	82	34	49	315	358	360	294	259	331	8	15	7	381	348	380	322	292	302	19	14	20	438	199	408	359	431	241	19	12	27	181	355	364	332	463	157
AFUA_1G14660	119	65	103	680	1113	456	1168	744	746	78	50	40	711	718	432	938	672	486	107	40	86	678	421	475	850	718	947	116	68	112	534	501	437	802	726	473
AFUA_1G14670	1734	1332	2048	610	571	690	780	627	973	809	687	639	736	635	768	745	865	842	1309	919	1356	848	454	824	797	555	845	1129	992	1439	461	577	539	423	915	447
AFUA_1G14680	5581	5062	7066	2699	3162	2895	4025	3125	4477	3870	3635	3411	2879	2803	3657	3288	3972	3771	6023	2488	5476	5099	2940	3374	4795	3397	4009	4804	4571	4962	2661	2714	3253	2517	4562	2181
AFUA_1G14690	1839	1347	1871	1156	1335	1584	1381	1141	1312	930	924	841	1612	1398	1424	1015	1169	1230	1226	833	1013	2234	1377	1946	1347	907	1264	1325	1370	1435	1193	1616	1421	1120	1296	878
AFUA_1G14695	541	365	380	186	282	259	286	221	156	513	403	260	444	352	280	236	223	130	234	224	248	579	217	382	216	99	140	188	221	223	265	494	234	260	179	53
AFUA_1G14700	729	476	533	385	403	303	449	366	425	658	532	375	312	292	283	334	381	369	701	417	519	345	231	358	393	420	296	410	382	418	220	297	227	317	452	221
AFUA_1G14710	1160	691	980	1319	1188	751	3596	3557	10873	748	680	489	1199	1048	858	3135	7444	6313	298	280	304	1089	760	806	4436	3105	12109	626	675	620	1472	1759	639	1476	6268	5819
AFUA_1G14720	2930	2530	3541	1223	1381	736	693	899	2024	2876	3002	2363	743	853	922	1019	1700	1890	1819	1488	1675	887	544	1075	1787	1752	2538	2584	3020	2667	432	651	636	613	2642	1335
AFUA_1G14730	1448	1137	988	2723	3262	3319	1952	1380	1473	1011	948	608	4533	3932	3397	1246	1109	1633	490	455	407	5629	2966	4731	1029	1401	936	321	320	509	2914	3704	3660	1655	2422	645
AFUA_1G14740	7590	5216	7543	2115	2250	1615	2053	1737	1963	6575	5681	4845	1753	1587	1651	1874	1875	1277	5453	4089	5160	2465	1815	1933	2276	1820	1727	6065	5766	5966	2038	1949	1525	2222	2298	809
AFUA_1G14750	6560	6556	9272	1315	1344	1412	2253	1559	2312	4503	4868	5277	1097	1157	1397	1576	2097	1869	7893	4696	7841	1536	839	1387	2346	1406	2026	8655	10354	8634	981	888	1264	783	1851	1352
AFUA_1G14770	1082	1187	1332	701	615	774	682	597	1252	762	756	525	723	656	776	700	1183	1017	844	589	730	738	324	867	1242	1208	721	740	703	959	189	521	631	336	1291	330
AFUA_1G14780	6648	4871	6104	4100	5929	4735	3554	4258	8280	4721	4471	3913	5186	5315	5044	4569	7975	8581	4341	5472	4372	7690	4838	6488	6277	4233	8528	5256	5800	5808	5691	8446	4435	5498	9874	7008
AFUA_1G14790	633	617	738	551	716	847	1237	951	907	544	579	665	704	703	756	944	964	668	1345	1567	1396	1001	574	1068	1437	905	990	904	847	670	666	805	773	1281	1166	555
AFUA_1G14800	470	283	372	5653	6571	14642	40639	29815	26601	340	249	273	13597	10709	14168	36552	29629	20780	330	281	293	17408	8992	17178	45051	37489	11650	330	346	275	7427	11819	9077	36972	31255	5729
AFUA_1G14810	74	35	41	1535	1724	2100	2116	1600	1903	62	37	41	2453	1940	2175	1735	2177	1296	51	12	50	3131	1723	2372	2761	2072	1236	32	27	27	1488	1500	2002	1169	1802	751
AFUA_1G14820	1	0	3	63	106	178	97	92	119	5	5	22	120	74	182	91	126	87	3	3	1	245	130	135	207	124	113	5	4	5	106	65	150	58	105	74
AFUA_1G14830	4319	3817	5921	12988	5471	4683	5555	8635	16574	2220	2515	2837	2235	2668	4896	9038	17100	14253	4099	3581	3197	2782	1954	4211	8764	7403	16581	6024	5544	5667	2400	2974	3447	2319	15473	12327
AFUA_1G14840	189	175	164	295	256	197	232	232	393	159	166	117	213	163	159	258	402	245	131	90	107	194	105	210	324	456	372	92	136	133	100	123	118	110	305	248
AFUA_1G14850	1228	732	1148	2819	2076	2558	9591	8066	9593	500	458	360	2202	2305	2546	8796	9014	8454	1110	647	989	3772	3280	2893	9288	9472	7126	726	630	876	4691	4934	2403	5586	10774	7231
AFUA_1G14860	55	25	40	80	81	81	163	106	71	13	37	31	77	46	35	59	93	43	38	26	26	65	81	60	103	147	82	29	16	43	72	96	39	75	82	20
AFUA_1G14870	907	758	801	398	442	388	237	257	597	588	564	452	541	431	465	290	545	499	387	353	364	545	306	421	408	332	481	625	852	787	306	518	273	269	564	238
AFUA_1G14880	1473	847	1478	703	657	544	526	838	1669	700	849	754	588	605	683	906	1313	1450	1340	1500	1380	852	618	598	1412	1455	2513	1535	1517	1858	973	1158	583	810	2648	2118
AFUA_1G14890	1621	1190	1541	381	458	242	914	649	611	1133	999	671	436	352	318	737	580	431	663	467	604	387	226	205	745	549	468	1210	1286	1477	330	390	215	582	612	289
AFUA_1G14910	4943	4501	6873	2755	3644	2299	3302	2670	4048	3191	3386	3887	2311	2600	2561	2440	3402	3350	5173	2999	4855	2510	1788	2624	3062	3030	4449	5586	5568	4739	2240	2141	2137	1934	3525	3396
AFUA_1G14920	931	722	857	1470	2121	1728	1758	1600	2159	749	572	503	1842	1690	1773	1587	2019	1791	853	741	727	1914	942	2013	1820	1825	1450	565	680	633	1260	1774	1562	1102	2121	981
AFUA_1G14930	4024	2787	2932	6821	13306	11927	3302	2878	9735	3072	2335	1827	13591	14828	12924	2640	7096	10276	1920	1456	1427	24627	22009	15868	8309	13017	10155	1353	1526	1734	30062	24703	17888	3520	10538	6377
AFUA_1G14940	2962	2198	2642	2204	3435	2439	3091	2482	3037	1814	1445	1359	2667	2529	2734	2398	2549	2603	2605	1428	2323	3225	1885	2949	2836	2363	2304	1880	1917	2360	1854	2820	2246	2425	2963	1844
AFUA_1G14945	207	135	158	290	250	110	2586	2085	1359	119	110	96	437	482	157	1475	1025	808	77	20	53	474	394	172	1088	1086	628	89	110	104	797	1031	123	2068	1356	445
AFUA_1G14950	90	107	102	301	252	811	1398	1238	1139	55	57	65	908	696	811	1087	1171	915	230	135	210	1288	695	1052	1470	942	736	83	58	42	738	959	874	1457	953	530
AFUA_1G14960	272	149	265	3868	4789	2732	3528	4997	6576	144	72	77	2845	2797	3276	6163	7311	5375	143	65	94	3966	1850	2516	5655	2107	5917	185	152	186	1642	2893	1678	2169	6198	2853
AFUA_1G14970	314	215	214	236	409	212	319	262	282	113	58	56	365	288	211	281	226	181	106	73	72	382	190	252	262	282	167	97	105	93	197	315	187	216	262	52
AFUA_1G14980	624	426	380	125	176	64	241	193	81	343	255	228	100	97	103	185	121	75	243	176	180	149	104	124	208	108	210	108	147	216	92	92	73	330	266	40
AFUA_1G14990	135	297	393	766	765	842	689	680	2248	15	15	51	756	681	1098	977	2028	1822	223	100	153	1074	602	1356	2372	2403	1405	79	63	78	349	579	864	406	2100	830
AFUA_1G15000	1364	1228	1835	1839	2583	2748	2335	1573	2918	586	412	375	2805	2882	2391	2047	2800	2226	1541	819	1377	3271	1837	2804	3789	3522	1516	1082	806	1219	1391	2060	2601	1276	2971	930
AFUA_1G15010	3459	2424	3412	2335	2486	1831	1860	1760	2485	1917	1529	1511	1751	1655	2071	1777	2671	2060	2480	928	2136	2685	1735	2019	2188	1204	2597	2384	2331	2971	1637	1845	1392	1246	2252	1548
AFUA_1G15020	9239	8422	9403	12955	12725	21978	6057	6161	8511	11314	8754	7709	26653	22686	19249	5733	7970	9808	13007	10773	10842	30987	16813	28385	6483	6878	5540	5327	4485	3902	11698	22218	20459	6966	10849	4525
AFUA_1G15030	732	599	886	957	723	800	924	755	1733	264	240	163	1261	1007	923	1002	1588	1187	853	653	780	1360	723	1141	2034	1773	1071	571	377	402	537	1058	807	450	1355	530
AFUA_1G15040	315	285	397	465	433	319	303	365	477	215	210	227	463	382	327	401	437	424	755	478	713	382	228	443	428	220	404	320	304	281	233	349	306	177	419	161
AFUA_1G15050	109	95	94	773	696	959	835	558	843	65	32	56	1412	1091	1170	669	627	871	195	138	183	1866	861	1348	861	579	457	72	54	90	714	1244	1031	625	783	523
AFUA_1G15070	1194	778	1016	1033	1213	853	1538	1107	801	756	613	483	1547	1245	842	1229	806	626	1610	1375	1569	1591	1113	1061	987	724	692	816	606	560	1444	1597	901	1414	890	378
AFUA_1G15080	32	33	46	966	1443	1023	700	655	1111	16	19	12	1060	1021	924	694	996	935	120	61	113	1137	796	1125	1069	682	731	65	29	52	749	817	892	399	1016	373
AFUA_1G15090	3162	1987	2984	675	671	674	696	699	993	1448	1257	936	712	707	538	767	896	663	1072	1195	1047	820	590	633	894	367	908	1646	1879	2337	659	863	536	522	718	434
AFUA_1G15100	94	58	143	100	93	150	67	62	75	7	11	6	147	110	166	82	75	80	96	48	76	156	103	233	71	53	58	136	105	144	55	106	141	63	74	19
AFUA_1G15110	1362	1070	1491	732	1205	758	3557	2377	1508	1083	1065	836	750	711	763	2251	1540	1164	604	296	532	1245	732	976	2255	2207	670	1301	1580	1537	816	843	591	1620	1389	330
AFUA_1G15120	765	438	662	703	843	740	504	419	553	481	344	233	793	750	660	435	421	432	478	261	539	865	434	912	504	310	351	406	364	532	357	669	568	250	571	208
AFUA_1G15130	501	399	525	534	511	1041	1809	1497	1455	580	431	402	1155	978	1184	1685	1694	1108	552	515	578	1578	875	1667	1721	969	847	396	384	246	1072	1399	1075	1564	1326	516
AFUA_1G15140	523	509	727	6041	7095	7259	4861	5176	14731	112	98	69	8429	9917	8632	6260	10454	14065	210	83	115	8378	5373	10542	9540	7331	15605	106	86	190	4363	5658	8666	4338	15990	8862
AFUA_1G15150	86	69	79	1138	1356	594	307	306	500	64	43	31	501	513	623	344	422	271	33	13	20	440	281	412	376	416	364	31	21	31	396	485	390	173	543	178
AFUA_1G15160	298	177	210	9014	12837	5336	4718	5973	7948	173	148	140	1838	3792	5361	5499	6587	5513	83	87	65	1454	1090	4694	5635	3557	9664	105	88	136	1957	1849	3862	998	7796	6205
AFUA_1G15170	326	188	306	2207	2318	755	1219	1590	2472	97	152	87	812	908	838	1656	1886	1700	193	179	159	958	696	857	2507	4054	3297	131	97	176	772	989	624	711	2842	2251
AFUA_1G15180	288	193	226	1865	2184	1608	9843	4704	3454	64	53	82	3285	3745	1962	3095	2777	2651	315	127	243	6819	5956	2698	4247	6520	4956	144	181	102	6984	5467	1955	5887	3587	4593
AFUA_1G15190	164	134	113	96	106	36	87	69	61	102	81	63	44	24	45	53	44	31	57	79	46	62	65	39	69	125	66	61	64	71	62	94	19	103	71	4
AFUA_1G15200	1005	666	1096	4633	4349	3566	5339	4157	4226	488	335	321	3591	3350	4124	4176	3896	3334	676	416	600	4414	2702	4217	3781	2948	4021	760	676	796	3030	3375	3192	3249	4016	3620
AFUA_1G15210	24	9	13	332	229	295	201	162	155	26	15	8	322	299	301	191	155	130	21	21	12	337	181	400	121	110	113	4	12	11	228	312	323	181	198	165
AFUA_1G15220	200	77	81	268	333	344	315	256	242	86	46	52	321	324	346	284	238	213	65	37	42	368	270	334	214	297	228	35	50	55	293	322	333	259	385	178
AFUA_1G15230	1273	1198	1654	2345	2114	1093	922	920	1750	737	728	634	742	841	967	1044	1387	981	1380	865	1549	963	650	942	1531	965	1831	1901	2007	1997	860	636	845	498	1441	967
AFUA_1G15240	930	605	622	768	777	1112	931	742	740	490	419	279	1393	1145	969	828	754	637	294	256	224	1158	828	1205	580	623	430	309	324	443	927	1239	944	856	830	431
AFUA_1G15250	2133	1514	2285	1277	1445	1761	2011	1786	1944	1092	1092	1182	1579	1707	1648	1973	1957	1768	1501	1427	1293	1951	1146	2101	1797	1197	1568	1559	1647	1802	1424	1873	1524	1649	2051	1307
AFUA_1G15260	2498	1642	2220	5760	6261	3723	2823	4116	7276	1731	1555	1069	10019	9266	4259	4255	6706	7368	1787	1229	1438	13214	7206	5252	5758	1666	14585	1605	1661	1677	6457	10877	2620	4707	9216	6799
AFUA_1G15270	5705	5707	9553	12894	28662	9730	10205	6103	12914	4041	6897	7725	12344	20425	12771	2677	9377	11410	14044	12412	14878	29643	42628	17995	5847	36101	29080	17065	13841	9574	56444	33704	24439	12992	26480	26113
AFUA_1G15280	226	194	190	467	702	420	682	471	313	127	147	108	412	485	447	556	395	227	140	115	107	460	336	546	392	582	289	187	178	256	452	569	469	514	544	227
AFUA_1G15290	67	90	66	98	167	61	54	35	51	132	93	52	30	43	51	43	64	45	46	44	47	31	22	50	51	90	38	76	74	32	41	33	56	71	62	9
AFUA_1G15300	148	95	90	136	149	134	315	282	171	109	74	50	178	158	130	284	203	165	83	38	62	159	102	124	221	137	165	50	34	70	201	143	98	195	189	88
AFUA_1G15310	351	231	338	1052	1260	1422	914	727	823	149	137	122	1515	1441	1491	725	772	706	264	123	243	1929	947	1601	863	589	451	229	203	264	937	1251	1225	472	683	330
AFUA_1G15330	292	253	203	159	171	144	263	182	220	193	204	187	252	232	176	224	192	161	166	172	93	306	219	199	249	106	193	88	81	158	366	380	137	298	191	114
AFUA_1G15340	42837	26728	29063	915	1358	1154	1627	1107	868	42039	33136	20545	927	885	1237	1036	1199	602	10531	4247	8951	1389	909	1093	930	1042	798	13944	17169	22246	1470	1103	1260	866	1304	423
AFUA_1G15350	12564	8477	8592	355	517	419	2849	2389	1767	12592	10432	6621	747	763	347	2750	1948	1432	3324	2839	2998	699	478	408	1916	2792	629	3938	5368	6111	816	767	380	2024	2493	447
AFUA_1G15360	1020	782	752	262	292	186	241	242	220	1117	897	435	327	293	161	254	220	184	223	174	194	309	215	342	237	235	154	189	229	314	195	207	201	228	243	67
AFUA_1G15370	4875	3847	4915	2649	3424	861	1684	1135	1322	3987	3118	2176	1209	1345	924	1211	1135	1017	2165	1031	1912	2007	1729	1196	2372	1997	1461	2340	2799	2820	1362	1352	851	989	1350	757
AFUA_1G15380	40	39	44	985	1523	1691	773	697	629	20	16	31	1957	1722	1918	615	500	618	12	7	16	2303	1410	2308	390	465	384	12	27	37	1418	1725	1803	731	904	253
AFUA_1G15390	4904	3732	5014	1676	1611	2861	3811	3277	3224	2925	2722	2619	2821	2572	2475	3436	3201	2595	3531	3153	3282	2775	1737	3141	3306	2491	1819	3875	3704	4378	1583	2328	2188	2240	3407	1290
AFUA_1G15400	405	319	491	458	358	477	664	633	914	157	167	169	565	492	534	709	836	846	572	392	422	694	505	602	1083	910	794	298	241	339	558	806	477	572	1063	476
AFUA_1G15410	1505	815	1287	95	126	89	210	169	125	855	715	510	90	69	91	102	138	120	942	285	837	115	105	99	154	165	106	1041	1252	1352	80	64	48	68	169	60
AFUA_1G15420	1961	1283	1524	113	130	73	248	176	165	1233	789	564	85	99	64	177	160	121	743	731	715	104	86	101	171	138	186	1187	1216	1518	112	132	78	192	200	63
AFUA_1G15425	0	0	0	0	2	0	0	0	0	0	0	0	1	1	0	0	0	0	0	0	0	0	0	0	0	0	0	0	0	0	0	0	1	0	0	0
AFUA_1G15430	17	17	13	952	1319	808	786	887	972	19	10	12	887	774	807	1048	1161	840	19	31	16	992	653	978	825	363	986	5	13	19	561	828	627	786	1154	589
AFUA_1G15440	167	139	144	5201	8916	1313	819	845	3132	144	68	69	1611	1960	1378	1192	3398	2371	166	51	111	1804	1225	1212	2342	1028	3407	98	86	108	1754	1508	1654	495	2793	2514
AFUA_1G15450	707	876	912	4061	4206	3430	1277	1454	4377	573	562	559	3992	4408	3731	2138	3722	3705	453	336	406	4990	3104	4624	3604	3496	3400	445	434	433	1834	3436	3486	959	4649	1224
AFUA_1G15460	545	355	514	1198	1357	1047	1633	1170	1088	209	287	227	1132	1191	1120	1211	910	907	430	303	369	1426	908	1421	1262	729	783	303	258	326	910	1184	981	1184	1056	456
AFUA_1G15470	368	170	249	208	225	328	621	446	342	224	164	120	403	352	316	571	350	292	238	124	236	553	300	364	454	388	202	127	89	80	357	362	336	457	338	137
AFUA_1G15490	243	369	402	5537	7105	5570	4480	4031	5967	833	927	877	4683	5661	6943	2923	4304	5090	258	218	353	5953	4289	9721	3471	6339	3419	200	351	270	2940	3874	5797	2262	6261	2159
AFUA_1G15500	319	431	664	1841	2378	1010	1642	1338	2332	256	487	756	975	1271	1226	1238	1697	1746	1569	1450	1700	1400	1006	1456	1869	1768	1350	813	746	400	735	1016	815	661	1577	898
AFUA_1G15510	189	182	213	414	552	517	559	521	773	110	118	130	587	586	609	512	592	610	244	284	314	462	312	611	488	322	547	233	187	156	357	405	378	316	603	393
AFUA_1G15520	2404	1551	2068	341	296	191	2701	1231	1197	1759	1447	1129	261	183	181	1059	861	774	1519	1427	1607	345	329	236	1245	1421	2054	1463	1526	1353	349	333	175	1735	1371	732
AFUA_1G15530	2765	1984	2450	114	151	99	1141	555	481	2371	1968	1504	104	104	105	493	366	430	3344	4580	3512	117	158	136	412	661	1395	1876	1682	1224	194	207	87	744	675	578
AFUA_1G15540	292	194	254	236	257	198	2190	1173	381	263	248	162	327	274	169	838	389	200	121	93	144	525	370	382	1051	1319	213	115	154	166	245	322	238	2130	539	163
AFUA_1G15550	1252	818	781	1978	3047	1799	15563	8571	5727	682	581	546	1907	2042	1543	6705	4021	2701	555	378	577	2645	2265	2679	10235	12303	4572	655	665	593	1789	1949	1743	6814	4035	2547
AFUA_1G15560	721	542	758	440	499	252	409	210	287	264	236	193	194	230	242	210	339	251	465	464	386	220	180	327	310	882	337	489	570	826	251	205	267	139	310	190
AFUA_1G15570	726	477	727	365	404	265	299	210	606	397	299	236	322	349	289	297	528	446	599	218	473	361	226	321	477	244	415	487	408	553	306	314	263	141	367	225
AFUA_1G15580	348	203	328	524	521	835	763	681	686	192	216	192	893	794	760	949	658	531	680	565	567	1140	588	1039	669	546	406	250	180	264	656	1024	791	456	672	386
AFUA_1G15590	4268	2988	3505	2489	2464	3166	4606	3898	5772	2739	1973	1558	3396	3504	3009	4579	4902	5256	2637	2564	2397	3444	2308	3682	4583	4006	5087	2202	1983	2471	2783	3524	3270	4849	6933	3936
AFUA_1G15610	1374	1492	1722	1049	885	394	612	593	1274	1876	2079	3292	714	737	398	642	935	1205	1824	1990	1523	921	663	516	844	1583	1333	1087	1051	795	481	905	334	576	1373	1071
AFUA_1G15620	2097	2592	3396	1756	1678	1044	602	748	3472	1587	1669	1621	1494	1740	1263	1258	2839	2843	1217	823	1019	1916	1048	1446	3115	2967	2339	1354	1403	1777	680	1218	928	327	2720	1553
AFUA_1G15630	295	377	477	285	184	195	152	154	376	217	243	288	237	211	190	164	346	319	620	369	587	268	140	292	266	304	297	535	393	314	138	231	161	96	317	175
AFUA_1G15640	3415	2930	3353	496	705	619	398	518	620	3244	3418	3707	590	626	719	382	537	586	3050	3584	2467	616	447	783	447	394	951	2902	3205	2836	807	862	757	565	812	765
AFUA_1G15650	58	44	72	41	36	11	142	115	76	24	25	12	31	38	19	175	79	51	39	32	21	28	17	15	158	110	19	95	70	110	35	27	17	124	78	2
AFUA_1G15660	3	4	5	166	148	108	60	47	69	2	1	0	75	81	118	47	67	80	7	0	1	73	47	147	50	48	22	4	2	5	37	62	92	21	73	58
AFUA_1G15670	57	38	44	1269	1205	2252	512	403	849	45	22	11	1306	1240	2900	536	693	1078	80	19	56	1640	982	2362	461	387	660	35	24	26	947	1139	2043	333	1000	469
AFUA_1G15680	89	45	42	252	203	298	633	566	307	32	17	18	292	308	270	437	369	262	87	29	77	286	235	251	359	361	291	22	28	16	274	349	211	498	348	82
AFUA_1G15690	32	26	14	326	195	150	71	210	261	24	11	9	59	72	101	262	541	317	5	1	8	41	33	87	62	90	375	4	10	27	35	39	45	54	218	635
AFUA_1G15700	615	565	576	1216	626	453	582	532	1368	425	333	248	765	688	519	769	1358	923	222	179	243	674	393	599	1321	582	779	301	374	355	362	433	403	360	844	343
AFUA_1G15710	355	243	274	630	501	768	771	552	699	127	77	55	876	647	732	658	694	537	136	74	104	1206	598	935	614	651	521	142	96	143	540	720	546	521	674	243
AFUA_1G15720	5780	4026	5573	3028	3897	2298	3737	3132	4832	4861	4199	3184	2836	2509	3030	3538	4632	3578	2232	764	2190	3060	1604	2803	4644	3289	3198	3251	4075	4341	1508	1792	2449	1991	4306	2092
AFUA_1G15730	2828	2933	3429	11712	11877	17750	4539	4671	7971	1933	1492	1273	21643	18303	15531	4587	7211	8770	2554	2355	2147	26640	15815	24511	5652	6673	5956	1150	942	979	13032	21967	18204	6245	9813	3947
AFUA_1G15740	462	248	321	604	622	319	432	375	447	202	216	157	530	495	369	502	406	314	319	280	252	558	493	453	478	413	523	253	240	453	482	749	302	387	630	216
AFUA_1G15750	920	686	852	670	665	526	914	729	1045	398	380	359	579	661	623	784	970	835	884	664	819	792	455	709	1047	657	827	729	717	966	454	674	464	686	941	589
AFUA_1G15760	614	770	1068	917	1008	1767	1731	1486	2143	431	528	656	1874	1679	2042	1567	1756	1967	1850	1541	1643	2824	1342	2792	2042	1290	1484	1226	1147	874	889	1419	1836	1320	2148	1083
AFUA_1G15770	278	153	272	295	286	285	431	285	337	143	98	90	287	284	301	306	297	204	520	296	515	336	211	386	382	166	288	263	200	286	223	261	270	271	315	175
AFUA_1G15780	436	192	325	1621	1115	3118	1313	1193	1030	144	82	67	3892	3024	2954	1391	891	871	261	151	201	3850	2079	3630	1040	783	745	131	78	166	1803	2855	2888	1241	1048	609
AFUA_1G15790	759	729	1013	604	759	563	722	627	1135	501	344	360	763	713	645	759	935	904	722	312	603	746	397	683	1073	567	1276	476	462	445	495	670	623	555	921	820
AFUA_1G15800	2384	1843	1979	816	823	778	1154	1150	1330	2003	1925	1428	855	777	758	1184	1409	1246	2289	2083	1955	1072	579	1089	1451	1105	1384	1459	1528	1309	592	924	559	1183	1654	708
AFUA_1G15810	54652	36590	37959	1223	1438	1786	2240	1416	1182	59104	54318	31891	1024	1167	1805	1357	1383	874	15737	11186	14633	2198	1634	1978	1078	1827	1255	18942	22402	25257	1916	1595	2031	1352	1861	638
AFUA_1G15820	2939	2623	3294	3442	4205	3475	2478	1559	2304	2514	2391	1871	3248	3553	3773	1396	2133	1890	1484	1039	1368	3941	3028	3983	1618	2325	2208	1827	2086	2127	4287	3763	4131	2373	2394	1201
AFUA_1G15830	223	160	212	561	480	1281	2500	1585	1072	170	218	223	989	840	1505	1314	1141	999	198	143	180	1276	986	1689	780	1403	374	152	179	127	874	1039	1509	2320	1307	295
AFUA_1G15840	1185	957	1244	251	343	298	412	295	320	689	745	716	301	293	362	348	290	234	933	602	828	353	208	274	346	344	229	1132	1051	1195	176	264	231	319	367	125
AFUA_1G15850	2459	1745	2201	213	223	72	255	199	114	1986	1667	1106	158	129	75	155	118	51	536	273	479	187	139	118	287	102	156	1119	1492	1565	167	123	61	203	101	42
AFUA_1G15860	2062	1195	1757	2128	2239	2410	1468	1432	1524	1124	684	514	2680	2409	2503	1403	1372	1326	1442	979	1321	3337	1918	2887	1265	1009	1248	1246	1175	1542	1918	2438	2277	1492	1611	876
AFUA_1G15870	29834	22520	22763	2396	4175	1384	2018	1231	1093	48156	38722	26246	1373	1378	1619	1173	1295	703	10111	4987	9404	1445	1018	1426	1302	992	1363	14151	18842	15669	1161	1311	1562	944	1262	841
AFUA_1G15880	3630	2756	3855	2847	3045	1712	1653	1577	2222	2058	1789	1512	2013	2056	1873	1748	1925	1563	1915	1263	1746	1677	922	1978	1880	1555	1915	2255	2483	2846	949	1362	1105	721	1835	1027
AFUA_1G15890	4077	3766	5100	1003	1418	1342	1302	1518	2194	3082	3436	2952	1317	1362	1244	1504	2231	1880	1644	1340	1475	2114	1224	1394	1918	1336	1929	3730	4951	4363	1431	1723	996	1158	1862	1139
AFUA_1G15900	1646	1241	1708	1485	1975	1307	1729	1221	1386	1188	1042	883	1345	1188	1239	1398	1316	1071	936	531	799	1457	766	1437	1632	1129	1269	841	914	939	639	1024	1081	987	1351	640
AFUA_1G15910	285	285	346	803	1192	268	356	492	434	345	219	183	108	214	279	654	342	353	218	191	196	81	34	164	234	272	356	182	198	136	99	75	88	110	416	271
AFUA_1G15920	1451	885	1212	1782	2225	1317	773	704	882	590	867	789	1297	1334	1348	640	768	800	1359	1443	1259	1687	1006	1672	775	681	686	782	806	1221	1079	1586	1039	528	1022	659
AFUA_1G15930	3992	3216	5206	2443	2637	1091	1960	1575	1590	2512	2405	2075	2018	1662	1284	1249	1298	1127	1944	1750	1771	2262	1660	1267	1714	2008	1317	3027	3478	3833	1755	2087	1086	1106	1533	909
AFUA_1G15940	14257	13823	18237	3596	4540	2665	3169	3649	5516	14115	16181	15265	3519	3439	3792	3035	5021	5201	10618	8678	10539	4687	2937	4243	3817	1323	7907	14086	18532	14432	2888	4278	2334	3938	5371	4288
AFUA_1G15950	3087	2780	3419	3421	4244	3089	3910	4166	6573	4540	4434	4455	3897	3812	4188	4326	5870	5642	1806	1136	1679	4849	2954	4831	5971	2837	9038	1747	2282	2047	2802	3923	2826	3483	6656	4837
AFUA_1G15960	1558	986	1255	3049	2959	3493	3023	2581	3366	586	590	629	3909	3690	3445	3086	2897	2672	1275	1107	1109	4898	3111	3907	3136	2177	2516	863	831	1238	4006	4143	3671	2746	3063	2711
AFUA_1G15965	0	0	0	3	0	0	2	1	2	0	1	1	2	0	0	2	0	0	0	1	0	0	0	0	1	1	0	0	0	0	0	0	0	0	0	0
AFUA_1G15970	79	56	59	27	40	42	68	58	40	20	16	32	62	55	39	48	43	37	37	14	12	99	37	35	39	35	45	35	20	23	37	62	34	37	37	9
AFUA_1G15980	2	5	11	2	4	0	10	2	0	14	4	2	8	4	1	3	4	5	2	1	2	3	1	2	0	5	0	5	4	9	1	3	2	4	1	0
AFUA_1G15990	2	3	1	1	3	0	0	0	1	2	1	1	4	1	1	1	1	0	2	2	0	2	0	0	1	0	1	2	4	7	0	2	0	0	1	0
AFUA_1G16000	0	0	0	0	0	0	0	0	0	0	0	0	0	0	0	0	0	0	0	0	0	0	0	0	0	0	0	0	0	0	0	0	0	0	0	0
AFUA_1G16010	0	0	0	0	0	0	0	0	0	0	0	0	0	0	0	0	0	0	0	0	0	0	0	0	0	0	0	0	0	0	0	0	0	0	0	0
AFUA_1G16020	109	58	98	13	5	5	36	18	7	51	47	32	12	7	10	33	13	20	78	13	73	14	6	14	8	29	28	84	70	107	3	1	6	24	35	3
AFUA_1G16030	0	0	0	0	0	0	0	0	1	0	0	0	0	0	0	0	0	0	0	0	0	1	0	0	0	0	0	2	3	0	0	0	0	0	1	0
AFUA_1G16040	0	0	2	1	0	0	2	0	0	0	0	0	0	0	0	0	0	0	0	0	0	0	0	0	0	0	0	0	0	0	0	0	0	0	0	0
AFUA_1G16050	0	0	0	0	0	0	0	0	0	2	0	0	0	0	0	0	0	0	0	0	0	0	0	0	0	0	0	0	0	0	0	0	0	0	0	0
AFUA_1G16060	0	1	0	0	0	0	0	0	2	0	0	0	0	0	0	0	1	0	0	1	0	0	0	0	0	0	0	0	0	0	0	0	0	0	0	0
AFUA_1G16070	7	6	8	7	4	8	7	5	4	2	2	3	7	3	6	5	7	0	2	2	2	8	2	8	8	2	8	8	3	9	4	2	3	9	3	4
AFUA_1G16080	0	0	0	0	0	0	0	0	0	0	0	0	0	0	0	0	0	0	0	0	0	0	0	0	0	0	0	0	0	0	0	0	0	0	0	0
AFUA_1G16090	0	0	0	0	0	0	0	0	0	0	0	0	0	0	0	0	0	0	0	0	0	0	0	0	0	0	0	0	0	0	0	0	0	0	0	0
AFUA_1G16100	0	0	0	0	0	0	0	0	0	0	0	0	0	0	0	0	0	0	0	0	0	0	0	0	0	0	0	0	0	0	0	0	0	0	0	0
AFUA_1G16110	0	0	0	0	0	0	0	0	0	0	0	0	0	0	0	0	0	0	0	0	0	0	0	0	0	0	0	0	0	0	0	0	0	0	0	0
AFUA_1G16115	0	0	0	0	0	0	0	0	0	0	0	0	0	0	0	0	0	0	0	0	0	0	0	0	0	0	0	0	0	0	0	0	0	0	0	0
AFUA_1G16120	0	0	0	0	0	0	0	0	0	0	0	0	0	0	0	0	0	0	0	0	0	0	0	0	0	0	0	0	0	0	0	0	0	0	0	0
AFUA_1G16130	0	0	0	0	0	0	0	0	0	0	0	0	0	0	0	0	0	0	0	0	0	0	0	0	0	0	0	0	0	0	0	0	0	0	0	0
AFUA_1G16140	0	0	0	0	0	0	0	0	0	0	0	0	0	0	0	0	0	0	0	0	0	0	0	0	0	0	0	0	0	0	0	0	0	0	0	0
AFUA_1G16150	0	0	0	0	0	0	0	0	0	0	0	0	0	0	0	0	0	0	0	0	0	0	0	0	0	0	0	0	0	0	0	0	0	0	0	0
AFUA_1G16160	105	99	67	7	0	0	16	6	5	130	135	61	2	3	4	1	12	1	12	31	19	9	1	2	6	10	10	16	22	43	3	8	1	8	8	5
AFUA_1G16170	52	40	44	107	101	34	55	38	106	23	16	8	56	56	31	47	73	33	27	12	16	51	23	35	59	55	33	19	30	29	22	36	30	20	48	32
AFUA_1G16190	289	157	256	11257	10780	4778	14876	10981	13295	222	173	99	3865	5398	4767	8743	9336	9064	341	209	279	5581	5510	4327	10453	12622	13176	165	132	151	12085	8517	6106	9227	8667	15850
AFUA_1G16200	20	5	10	143	155	187	297	255	175	22	12	4	227	231	178	342	176	145	40	24	38	264	154	242	305	123	141	16	8	17	165	196	133	232	212	95
AFUA_1G16210	64	71	129	693	632	674	394	386	662	31	38	43	748	734	629	441	563	657	180	121	182	1075	608	879	583	401	511	63	54	37	529	691	690	272	674	454
AFUA_1G16220	3686	2735	4086	888	755	591	720	686	626	2718	2220	1863	680	591	632	680	491	436	1818	1301	1818	961	650	735	764	486	499	2388	2518	3054	800	663	749	628	491	218
AFUA_1G16230	926	683	916	848	725	617	664	651	1419	375	397	253	695	674	700	854	1227	1238	391	305	390	924	549	783	1174	1087	1105	431	430	584	528	745	574	463	1340	556
AFUA_1G16240	141	106	91	353	510	309	658	533	523	131	102	65	469	513	295	540	480	462	132	116	128	651	427	338	641	311	480	101	78	83	329	470	308	393	592	214
AFUA_1G16250	61	45	58	8407	8301	16116	4523	4723	5803	44	36	14	17567	13818	19965	5948	5424	5995	50	28	66	21460	11582	17999	4917	2870	7847	48	29	20	11757	14731	16380	4546	7218	4768
AFUA_1G16260	3	1	3	5	11	7	9	6	7	2	8	1	11	14	17	4	0	6	1	0	0	30	27	21	6	9	23	1	4	0	7	15	12	8	5	0
AFUA_1G16270	27	2	8	261	205	319	787	641	536	10	5	4	727	529	343	953	574	562	8	11	5	724	349	411	686	333	323	1	1	4	382	560	275	837	700	341
AFUA_1G16280	2083	1737	2302	3988	4105	5013	2121	2074	4803	755	733	709	5348	5536	4661	2318	3637	4647	1146	1015	958	6014	4220	6081	2836	2313	4215	893	809	1050	4517	5443	5103	2225	4825	3722
AFUA_1G16290	207	284	434	552	517	604	753	583	1299	124	124	149	647	575	766	652	889	1073	733	514	649	806	312	864	1117	903	757	383	239	227	207	489	545	404	1075	565
AFUA_1G16300	16547	11864	13016	466	989	425	666	742	748	16793	14646	9605	394	456	489	686	1087	427	4136	5207	3220	452	384	712	1091	598	974	7854	10406	12675	566	753	542	1007	1197	430
AFUA_1G16310	16745	12966	11464	197	297	199	914	645	332	18482	18994	12106	224	236	243	603	532	248	2727	2478	2171	254	186	281	519	393	582	3934	5162	8202	297	370	185	686	574	108
AFUA_1G16320	1625	1378	1574	621	755	601	1091	1036	1128	1360	1385	1069	548	508	595	1114	1169	807	1378	980	1295	648	456	755	1225	747	940	1021	1071	1246	445	572	481	824	942	465
AFUA_1G16330	1567	1584	1766	1017	745	1156	999	959	3367	2249	2597	1915	1105	1129	1352	1455	2699	2655	1141	884	1044	1644	855	1853	3332	3631	2343	917	1159	1381	458	934	1184	510	2996	1222
AFUA_1G16340	2774	1856	2515	2987	2723	1673	1464	1486	2711	1447	1075	744	2566	2342	1865	1678	2408	1930	981	535	870	2727	1437	2345	2681	1515	2533	1160	1287	1449	1311	2250	1611	1468	2622	1118
AFUA_1G16350	93	63	100	578	617	458	943	935	1379	58	36	27	816	620	495	908	1182	1052	76	38	55	886	421	602	1365	489	1111	45	55	58	387	600	347	843	1048	870
AFUA_1G16360	21	29	11	184	153	123	223	239	242	6	5	9	200	150	132	226	198	194	28	33	16	208	135	149	201	97	239	16	20	22	120	163	111	243	287	171
AFUA_1G16370	218	127	245	207	207	271	463	498	761	214	158	144	281	263	295	702	706	596	262	284	260	347	277	268	691	411	671	223	187	270	282	384	199	422	694	362
AFUA_1G16380	573	437	737	636	844	1006	1762	1651	3033	428	474	460	730	704	1005	2048	2491	2717	1104	785	969	1188	600	1332	2508	1405	2915	600	626	625	570	775	780	909	2552	1525
AFUA_1G16390	48	64	74	66	84	76	127	138	98	34	22	19	84	61	94	112	135	102	87	56	61	88	42	100	107	84	136	33	26	45	70	85	65	137	164	95
AFUA_1G16400	187	117	143	55	46	68	89	89	82	65	65	48	125	65	113	77	64	87	89	90	86	128	63	89	61	51	80	82	80	87	91	168	62	88	115	41
AFUA_1G16410	232	126	160	28	67	57	83	64	68	63	38	44	106	62	67	50	44	62	138	48	124	103	79	68	59	64	57	108	125	75	69	94	60	29	76	39
AFUA_1G16420	42	25	18	33	36	23	60	47	49	14	14	9	42	34	33	64	45	42	11	12	8	27	15	26	49	55	76	5	18	10	39	62	22	71	79	22
AFUA_1G16430	1910	1303	2243	75	64	45	68	59	49	1341	1326	1193	27	21	36	26	43	34	783	556	757	35	36	39	32	37	50	1599	1927	1992	64	63	49	28	56	40
AFUA_1G16440	295	223	285	267	309	44	74	95	169	190	166	115	105	155	71	107	149	132	149	120	132	61	58	64	127	610	129	219	210	433	83	81	48	39	268	147
AFUA_1G16450	62232	76186	84936	600	697	333	316	411	295	69690	81026	86837	128	218	354	369	381	253	51410	64498	45956	195	132	361	351	197	467	51155	58555	44465	332	195	356	252	512	87
AFUA_1G16460	667	533	699	9752	10127	6706	6830	7540	10567	281	183	187	3346	5339	9165	7116	7522	9785	694	431	674	4036	2772	7862	6030	4496	13066	560	509	419	2748	3412	5926	2964	12403	10209
AFUA_1G16470	332	209	456	556	428	924	951	799	1069	118	179	154	926	893	1117	919	1026	1048	595	373	560	1325	755	1318	1102	630	687	356	267	344	599	831	1023	563	1011	564
AFUA_1G16480	1656	979	1450	1754	2379	1655	351	432	821	1299	1214	820	1989	2124	1652	424	638	671	515	507	472	2651	1909	2038	557	367	774	727	995	1200	2155	2608	1859	477	876	444
AFUA_1G16490	788	745	820	445	517	482	625	659	799	632	502	500	766	679	558	710	728	692	1008	925	747	933	670	543	695	365	658	585	601	489	985	1255	399	599	811	341
AFUA_1G16500	1899	1287	1414	919	1113	1178	1068	862	896	1166	831	590	1477	1231	1291	955	909	726	716	626	618	1855	1157	1371	721	642	908	610	695	992	1342	1706	1057	909	899	577
AFUA_1G16510	693	436	505	510	576	816	1091	978	1043	340	340	293	870	758	746	1280	1113	842	388	381	338	936	540	892	1072	778	938	270	297	294	712	1068	721	959	1028	659
AFUA_1G16523	8518	7556	8747	15516	11874	19444	6561	6451	9236	7240	5158	5748	28268	24218	18929	6240	8459	9432	10713	11137	8563	31620	18875	29248	7343	6606	5612	4540	3877	3702	17731	29928	20951	8319	11905	4449
AFUA_1G16540	23	20	7	381	451	399	366	271	222	6	5	6	452	344	311	272	212	136	21	8	9	479	306	475	213	182	136	6	4	15	330	446	290	245	286	132
AFUA_1G16550	725	575	962	575	499	392	676	640	1230	281	273	201	426	444	446	846	1071	849	859	480	806	417	220	478	1119	865	829	473	431	627	195	397	290	273	944	393
AFUA_1G16553	468	310	577	603	656	460	493	416	758	194	158	142	449	551	535	492	649	685	711	687	623	632	420	667	728	550	703	497	331	321	404	485	420	376	776	414
AFUA_1G16556	22	6	20	60	100	28	19	21	13	1	3	0	62	44	27	27	14	12	426	211	356	52	31	34	5	16	17	219	53	145	45	58	34	11	22	3
AFUA_1G16560	203	71	270	223	273	56	87	78	106	40	30	13	49	71	63	97	106	64	1822	892	1526	55	51	57	96	100	96	1498	576	1231	64	57	41	60	91	45
AFUA_1G16564	431	172	494	744	1042	231	304	245	341	106	80	37	296	506	203	242	311	154	1811	698	1466	211	232	207	239	260	197	1505	646	1389	320	288	158	225	307	156
AFUA_1G16565	2	0	0	3	9	1	2	0	0	0	2	0	2	4	3	4	3	4	63	12	48	3	0	0	1	1	0	20	4	10	0	4	0	0	0	0
AFUA_1G16570	2287	1617	2040	400	444	505	858	777	789	1895	1671	1048	519	440	431	803	728	553	2086	1275	1911	630	397	478	1047	1123	532	1706	1554	1637	599	548	429	385	813	281
AFUA_1G16580	548	470	552	543	1079	363	777	653	617	484	338	251	238	285	385	660	699	370	486	237	604	315	190	381	792	429	595	383	456	533	192	289	316	317	522	267
AFUA_1G16590	206	149	184	15266	16946	8542	12618	12902	13598	215	154	143	12648	14542	10264	16244	12321	10952	220	137	149	10186	5376	10205	11683	6687	15449	131	126	108	4869	8229	5005	7068	12242	7957
AFUA_1G16600	158	135	150	729	616	784	640	688	914	48	43	58	1082	839	927	782	851	849	161	194	127	1220	655	1035	844	656	698	94	98	74	653	965	752	628	903	540
AFUA_1G16610	917	635	984	465	501	606	1205	933	1311	317	347	446	688	592	643	948	1185	1004	1274	612	1166	771	478	756	1333	871	997	846	664	729	502	512	538	403	984	611
AFUA_1G16620	1063	553	722	283	361	362	728	529	312	470	335	224	471	404	430	484	375	251	525	254	444	665	393	423	533	321	280	353	449	496	364	438	322	414	503	125
AFUA_1G16630	47	41	70	214	267	120	297	248	270	27	18	25	228	197	127	274	161	229	26	25	36	184	117	141	296	267	320	31	19	51	203	227	150	255	312	226
AFUA_1G16635	118	67	66	253	309	235	346	327	342	74	43	18	358	326	263	392	301	177	32	22	24	270	170	214	298	647	259	27	26	59	312	363	211	342	515	159
AFUA_1G16640	23	10	9	172	230	52	224	252	514	6	4	2	352	323	78	274	313	359	16	9	10	275	218	103	340	344	438	14	12	20	217	313	54	265	320	208
AFUA_1G16650	1667	1202	1855	2246	1685	1661	1853	1877	2795	1057	1054	983	2163	1888	1437	1991	2699	1902	1963	1889	2155	2158	1316	1750	2804	3362	2373	1755	1545	1395	1442	2126	1140	1179	2857	1474
AFUA_1G16660	148	115	148	702	643	935	698	557	1008	36	37	32	1156	927	923	743	833	780	366	242	339	1379	662	1069	1076	998	673	178	89	147	586	926	928	454	975	595
AFUA_1G16670	15	5	2	91	124	29	63	127	114	6	2	5	22	47	23	153	196	85	18	7	21	23	19	57	225	62	271	11	5	17	13	32	25	33	217	72
AFUA_1G16680	269	232	270	2482	2772	1906	2360	1840	2872	171	145	118	1939	1856	1969	2056	2558	2133	229	81	238	2301	1368	1803	3266	1704	2592	241	266	234	1331	1211	1618	1144	2446	1748
AFUA_1G16690	368	262	404	393	403	319	183	156	333	114	85	61	523	464	318	242	246	224	144	99	192	451	290	368	308	104	429	207	181	231	373	447	315	212	308	266
AFUA_1G16700	564	479	591	1024	1012	611	649	534	580	228	254	198	987	868	686	626	514	507	222	216	190	858	564	674	569	426	551	343	371	688	771	810	560	475	617	361
AFUA_1G16710	3750	3588	4480	7560	7602	2190	1267	2312	6995	3532	3955	3775	5415	4865	2433	3314	5320	4536	2287	2517	2558	3889	2306	2386	5650	10660	5060	5676	7523	5206	1742	2591	2136	892	7535	2888
AFUA_1G16720	693	600	785	1014	886	671	1562	1503	2146	442	415	440	1013	971	901	1835	1863	1650	1028	792	1021	816	508	714	1387	682	1762	639	584	738	734	812	635	893	1986	1159
AFUA_1G16730	245	187	329	1020	855	822	406	468	1052	77	70	61	775	784	969	540	823	924	223	131	186	873	372	1129	930	697	745	125	89	117	315	627	738	233	982	323
AFUA_1G16740	34	36	38	145	116	51	19	24	28	9	18	3	51	81	38	20	40	14	16	18	19	44	8	51	23	20	25	13	18	28	41	76	32	14	28	18
AFUA_1G16745	105	81	93	1910	2131	1632	1769	1728	3355	36	30	43	2204	2129	1908	2078	2942	2344	51	21	66	2408	1274	1931	2830	1926	2120	65	76	90	1198	1821	1462	1089	2748	1152
AFUA_1G16750	1162	857	958	1225	1253	1057	925	1028	1975	459	285	165	1140	1239	1224	1287	1664	1637	812	485	768	1352	845	1513	1581	1307	1441	637	477	817	598	1007	1185	816	1921	689
AFUA_1G16760	60	28	23	459	818	284	471	503	398	21	26	13	563	669	254	655	511	293	27	7	16	451	410	309	636	402	446	31	23	50	471	567	303	574	668	349
AFUA_1G16770	108	64	79	132	158	139	279	249	170	51	58	47	251	179	119	270	168	135	36	37	26	191	147	135	188	116	174	37	39	37	176	242	112	230	267	80
AFUA_1G16780	1886	1593	2153	2610	3002	1814	1590	1589	2966	1101	1051	976	1948	1807	2224	1501	2290	2517	1314	527	1065	2191	1344	2053	1971	1299	3107	1238	1482	1717	1092	1270	1530	710	2384	2049
AFUA_1G16790	3532	2906	4354	1095	1349	1085	1263	1030	1577	1962	1974	2095	1205	990	1243	1033	1324	1375	3835	2539	3585	1653	846	1293	1399	1095	1257	3266	2750	3001	860	1018	1030	897	1425	1074
AFUA_1G16800	3818	2581	3006	1165	1404	1555	1288	1149	1343	2825	2201	1536	1452	1216	1619	1091	1207	923	2534	1770	2182	2283	1141	1746	1331	928	910	2057	2195	2506	1097	1501	1331	686	1231	424
AFUA_1G16810	168	98	116	5114	4317	1414	1981	1547	7241	121	98	42	1062	1394	2380	1875	5577	5895	41	37	57	1663	1808	2328	2314	1747	17000	51	27	90	2118	1240	1368	1345	8899	3559
AFUA_1G16820	513	402	635	4214	4386	1214	1659	1745	2015	219	189	166	1185	1718	1602	1821	1720	1814	465	395	369	1076	740	1774	1618	977	3803	324	387	393	806	1031	1111	802	2588	1570
AFUA_1G16830	3434	2453	3802	625	684	551	1051	969	1350	2002	1829	1439	439	491	585	1006	1305	1024	1460	908	1374	553	339	565	1309	698	1224	2561	2815	3465	388	432	495	504	1176	492
AFUA_1G16840	7024	9316	12170	11606	11468	15809	11013	10728	16085	3934	4786	6588	22237	18593	14647	12347	14503	14147	10480	9343	9432	22135	13476	19680	11874	14370	12505	8144	7331	5653	12916	18394	14160	9597	18427	9305
AFUA_1G16850	3306	3136	3912	3250	3196	2988	1277	958	2212	2095	2021	1748	2892	3163	3513	976	1674	1681	1822	1082	1631	5091	3928	3303	1491	1262	2149	1888	1962	1915	7238	5324	4614	797	1810	1267
AFUA_1G16860	286	164	323	167	175	126	420	249	215	145	163	143	92	115	128	262	198	154	399	303	387	113	97	143	209	253	167	420	369	609	111	127	84	219	252	69
AFUA_1G16870	2031	1363	1324	170	218	95	7263	4185	1598	1873	1368	908	177	210	128	4041	1702	1219	613	560	581	308	308	90	2887	3550	369	790	1036	1171	742	791	124	4634	1897	309
AFUA_1G16880	472	342	473	198	160	197	171	167	328	279	245	185	230	225	173	228	290	202	201	145	197	244	153	227	400	241	246	321	314	333	161	160	149	184	295	126
AFUA_1G16890	21	13	12	0	10	3	2	3	0	5	11	4	2	11	0	1	1	5	119	46	74	9	3	4	2	2	0	17	13	34	4	0	0	2	1	0
AFUA_1G16900	0	0	0	11	6	2	1	4	4	0	0	0	6	2	4	7	7	0	0	0	1	3	1	2	5	10	10	0	0	0	0	1	3	4	5	4
AFUA_1G16910	22	7	4	21	30	5	11	6	6	3	11	4	11	7	1	11	12	3	1	7	5	14	4	6	4	2	2	5	9	1	6	4	2	5	5	13
AFUA_1G16920	16	10	12	15	19	17	26	18	30	0	2	2	20	20	27	23	24	33	5	3	2	12	20	15	10	18	33	3	3	2	34	16	17	38	50	15
AFUA_1G16930	401	246	363	7	7	2	2	5	8	119	123	119	10	11	1	2	9	11	246	326	202	22	6	6	3	0	20	498	656	525	6	7	3	1	13	5
AFUA_1G16940	164	216	310	366	484	422	440	464	1096	84	103	79	332	338	487	660	989	993	533	264	491	495	229	555	1076	808	887	170	115	169	145	286	351	241	1011	558
AFUA_1G16950	1695	1125	1404	274	339	446	515	352	391	873	791	681	458	380	400	383	453	256	1689	1286	1813	559	247	544	442	199	238	1180	1272	1377	267	336	338	316	285	102
AFUA_1G16960	6458	6130	7959	129	114	64	62	89	178	8111	9249	11914	121	123	87	107	134	271	7465	10989	7239	209	180	82	121	58	237	8102	9461	6607	85	200	55	91	105	89
AFUA_1G16970	2360	2689	3379	2320	2711	1778	2045	1682	2215	1967	2621	2836	1998	2101	1785	1751	2050	1795	3684	4220	3516	1994	1480	2373	2031	1345	1883	3382	4172	2998	1434	2008	1584	1583	1968	991
AFUA_1G16980	2718	2476	2761	840	1073	677	627	475	796	2164	2509	2176	879	824	675	483	646	759	2575	2958	2494	788	514	913	672	482	692	2334	2566	2388	521	730	614	497	762	479
AFUA_1G16990	720	538	762	492	475	497	884	657	741	266	241	230	627	535	479	682	685	533	838	744	884	714	401	618	755	505	523	833	671	671	459	618	414	620	667	309
AFUA_1G17000	465	365	661	464	526	810	751	604	605	411	513	466	778	693	732	646	540	497	1429	1323	1303	1073	769	979	621	531	591	936	484	529	890	1111	816	765	620	567
AFUA_1G17010	320	193	293	474	543	152	188	170	572	134	166	135	202	222	161	239	376	293	171	215	191	241	276	165	470	902	1145	184	157	297	366	624	137	182	933	599
AFUA_1G17020	587	522	751	651	796	464	865	683	869	191	214	178	749	658	504	695	907	633	273	211	257	672	437	464	948	506	743	409	461	635	494	631	413	585	889	398
AFUA_1G17030	117	95	159	195	238	428	324	364	388	38	32	47	523	326	495	423	495	459	118	102	87	680	422	524	431	183	431	140	193	235	543	678	508	296	571	242
AFUA_1G17040	606	523	853	1095	1065	2604	1458	1940	3190	402	465	566	2569	2363	2809	2524	3661	3361	1779	2019	1587	3381	2365	2493	3219	802	2557	1578	1354	845	4037	3862	2779	2267	3367	1772
AFUA_1G17050	8	7	8	20	52	22	11	19	35	2	0	0	16	20	35	12	37	20	0	3	1	20	11	30	21	9	34	5	7	9	27	19	23	6	37	12
AFUA_1G17060	9026	10570	13647	25	20	7	1	3	8	9966	11718	11631	13	15	6	11	3	5	7386	5276	6539	7	8	15	2	7	13	8040	7221	6935	12	11	1	1	5	7
AFUA_1G17070	14611	12351	15837	1918	2182	2778	3897	3855	7980	7968	8069	7071	2187	2777	3310	4977	5830	5987	10340	7845	11231	2176	1325	4236	6257	2496	7141	14342	16628	15957	1255	1583	2502	2605	6864	1953
AFUA_1G17080	3833	2381	3043	135	137	227	218	164	215	2437	2306	1865	257	227	250	239	236	114	2408	2336	2086	292	181	305	210	142	144	3480	3837	4337	193	354	196	143	209	59
AFUA_1G17090	285	193	384	748	735	677	998	896	1631	64	41	39	753	793	664	1021	1449	1297	779	509	628	869	564	792	1346	1101	1114	336	173	339	551	748	645	460	1296	747
AFUA_1G17100	1255	762	1171	545	550	590	766	666	746	566	525	366	883	751	693	825	826	645	806	561	663	911	525	659	827	364	438	888	863	993	580	881	611	697	652	302
AFUA_1G17110	677	479	658	759	759	658	1128	938	1037	331	308	251	697	699	704	1072	997	753	366	314	327	886	671	651	1191	856	948	379	476	480	1212	1259	647	1293	1121	428
AFUA_1G17120	677	360	550	921	1478	803	1160	895	1059	603	515	278	533	714	971	871	938	887	148	182	119	442	507	728	603	987	602	277	262	336	1137	882	1163	1079	2223	1469
AFUA_1G17130	59	34	44	30	57	74	297	223	93	49	30	23	55	60	72	244	237	98	42	19	39	98	94	73	297	187	75	28	41	39	136	116	71	230	125	40
AFUA_1G17140	124	70	91	259	257	233	1062	754	469	60	43	25	560	446	254	890	559	313	72	54	56	501	311	258	711	585	380	57	42	71	409	555	287	890	555	194
AFUA_1G17150	57	33	32	115	191	108	768	437	268	28	21	20	295	205	93	408	271	197	20	11	21	285	189	125	521	264	284	16	34	25	263	259	102	588	309	110
AFUA_1G17160	4	0	2	9	2	11	14	7	11	4	0	0	8	21	6	5	2	7	2	0	0	5	8	1	10	7	13	0	0	2	8	18	10	13	11	9
AFUA_1G17170	89	29	54	26	40	129	38	27	9	16	12	14	20	25	155	17	17	11	37	31	32	80	67	90	29	11	34	44	41	52	333	86	398	26	24	17
AFUA_1G17180	9	4	6	197	231	734	668	501	490	6	10	1	414	468	598	617	375	415	4	1	5	517	285	489	237	295	380	9	1	12	294	356	376	356	573	119
AFUA_1G17190	30	12	26	72	79	212	59	57	68	2	1	3	88	101	134	67	62	84	2	2	2	114	41	98	51	29	99	17	12	23	63	63	116	36	108	38
AFUA_1G17200	1757	1182	1505	1129	1334	1237	2100	1998	1464	1300	1049	750	1946	1586	1225	2486	1719	1133	419	220	384	3501	2253	1755	2427	1310	1610	1192	1544	1543	1645	1853	1280	2032	2079	595
AFUA_1G17210	0	1	0	1	1	1	0	0	0	0	0	0	3	2	1	1	0	2	0	0	1	1	1	1	1	4	0	0	0	0	0	0	6	0	5	0
AFUA_1G17220	42	15	20	78	109	17	37	34	50	11	11	4	40	77	19	33	26	25	3	12	0	55	36	22	51	32	21	8	12	6	40	55	22	24	32	4
AFUA_1G17230	211	157	175	295	251	167	232	185	251	78	77	63	213	181	198	198	191	222	107	68	91	240	206	174	175	166	175	97	92	128	172	212	132	155	338	94
AFUA_1G17240	277	187	208	239	274	165	221	184	259	112	53	60	151	147	169	173	210	254	87	37	67	265	171	169	225	225	195	103	105	104	96	145	137	125	255	123
AFUA_1G17250	9	10	14	92593	84955	181247	86712	83172	103887	21	3	26	145324	137106	207572	86406	82163	115779	6	0	9	200193	118377	241830	61587	69627	44206	12	13	5	107444	171275	178589	105647	123722	28211
AFUA_1G17260	38	41	41	747	711	427	459	556	1405	9	11	9	524	470	430	841	1790	1156	14	11	13	664	493	610	1384	265	969	43	66	53	456	590	379	299	1182	530
AFUA_1G17270	216	129	146	148	194	341	127	92	132	24	16	13	148	143	442	97	132	136	69	36	53	384	211	427	78	81	277	169	139	269	179	178	311	126	173	88
AFUA_1G17280	244	114	158	733	551	921	937	813	767	53	78	29	1000	844	880	987	934	785	85	103	96	1726	967	1472	874	639	482	133	147	149	689	1342	784	827	870	250
AFUA_1G17290	54	83	99	1963	604	438	495	598	935	50	25	39	263	395	398	460	955	907	111	92	48	282	203	447	327	270	862	119	92	95	259	303	362	218	669	1066
AFUA_1G17310	472	197	373	516	524	407	646	547	487	225	179	121	699	639	471	825	527	366	386	251	459	710	407	488	442	231	512	343	279	416	461	582	329	613	625	429
AFUA_1G17320	152	97	82	41	52	6	16	32	28	120	122	65	26	33	16	18	30	15	30	27	23	20	21	4	8	15	22	22	17	59	52	32	8	9	15	23
AFUA_1G17340	0	4	3	17	12	8	4	3	4	0	0	0	4	25	4	11	3	0	1	0	2	5	10	2	2	2	8	1	0	0	13	10	8	0	8	0
AFUA_1G17350	18999	16682	23916	2514	3236	1915	2125	2706	4597	14018	15688	15461	2014	1711	2622	2610	5182	3882	6613	6088	5774	2788	1907	2175	4183	3035	4433	11754	12719	16204	3908	2725	2486	1893	5278	2126
AFUA_1G17360	11460	11396	14812	423	566	684	730	1125	1347	9550	12607	14054	1005	802	990	1055	1460	1406	19946	21964	20887	1101	654	987	1465	568	1323	19824	17306	8647	755	1172	556	1319	1848	753
AFUA_1G17370	317271	255868	317913	427	531	124	59	262	924	357637	324182	339016	808	795	100	452	842	875	254562	442721	269018	1167	637	140	336	91	789	479214	574160	356278	889	2167	83	386	864	224
AFUA_1G17380	3010	3180	3932	54	124	69	5	35	123	3141	3602	3422	208	168	96	42	160	198	3177	5319	3827	203	116	62	60	10	238	5597	7298	4484	168	423	49	45	217	99
AFUA_1G17390	14	2	1	151	224	224	195	137	94	0	0	3	213	237	194	119	85	68	10	4	0	316	236	268	89	79	53	15	4	16	328	321	191	150	95	43
AFUA_1G17400	1656	1249	1771	1282	1986	2149	1024	872	785	1056	1321	1002	1701	1648	2336	909	886	807	3521	2855	2818	2678	2107	2947	869	636	875	2760	2192	2200	2152	2058	1782	882	1187	467
AFUA_1G17410	1269	929	1055	161	123	200	318	274	139	1395	1090	788	233	255	156	243	181	126	321	158	204	385	229	215	163	103	173	510	587	781	274	291	156	228	185	61
AFUA_1G17420	1415	1075	1616	82	153	53	103	57	62	982	946	700	60	82	69	76	85	57	490	537	327	95	53	76	68	36	107	823	1040	1143	80	115	52	99	110	43
AFUA_1G17430	11112	7273	8353	23	55	11	1	5	12	10560	10886	7613	20	14	7	4	19	7	1096	1070	1205	38	22	20	4	3	24	4154	5956	5810	38	39	10	3	18	7
AFUA_1G17440	3	1	4	16	4	8	4	6	3	0	2	1	10	3	8	1	5	1	1	1	2	1	7	3	3	3	0	4	0	3	5	4	6	2	1	0
AFUA_1G17460	895	710	988	2838	1706	1077	1362	1676	2406	494	381	349	317	830	1373	1378	2123	2346	577	385	441	445	495	1380	740	1032	2872	675	755	643	324	307	1170	1208	2061	3197
AFUA_1G17470	52	18	31	2215	3194	6529	48	101	175	18	13	3	7204	5175	5628	119	171	123	24	13	14	8889	6336	8086	118	118	292	23	33	54	5463	5548	6865	38	240	235
AFUA_1G17480	26	7	18	82	147	200	84	112	176	6	8	0	205	151	128	163	170	184	15	3	6	195	164	172	118	37	829	16	5	10	147	147	161	184	205	238
AFUA_1G17490	33	17	36	320	298	263	123	106	102	16	10	8	314	253	262	171	107	85	72	30	46	335	217	320	152	88	142	43	36	52	166	270	195	120	116	60
AFUA_1G17520	72	32	26	334	419	508	442	384	330	17	21	5	528	466	546	406	356	309	21	6	7	490	372	550	259	274	256	22	13	18	419	488	432	478	432	187
AFUA_1G17530	29	45	22	206	240	145	327	257	131	27	12	8	270	215	158	301	225	100	8	14	11	238	129	145	232	207	113	21	20	21	230	314	118	266	208	52
AFUA_1G17540	1	2	1	8	0	2	0	0	1	0	0	0	2	2	0	0	0	0	3	0	2	0	2	2	0	0	0	1	8	0	1	1	0	0	2	0
AFUA_1G17550	78	52	66	269	434	342	285	276	239	48	28	19	137	144	300	260	219	200	55	47	48	243	158	304	271	191	348	53	28	30	278	171	333	69	304	177
AFUA_1G17560	0	0	0	5	12	2	2	4	10	0	0	0	8	5	1	1	2	3	0	0	0	2	4	5	3	4	6	0	0	0	3	0	1	4	12	0
AFUA_1G17570	0	5	1	0	6	0	0	0	0	0	0	0	9	3	0	0	0	5	0	0	0	5	0	3	1	0	3	0	1	0	0	1	0	0	1	0
AFUA_1G17580	10	8	6	6	8	4	7	6	11	1	1	0	47	22	8	6	2	14	3	1	4	12	7	9	9	6	2	3	2	3	11	12	12	7	11	18
AFUA_1G17590	0	0	5	6	17	13	8	6	3	0	0	1	12	8	2	12	8	9	1	0	0	30	12	4	8	3	5	0	3	0	17	14	5	2	4	0
AFUA_1G17600	0	0	0	0	0	1	0	2	0	0	1	0	5	0	0	0	0	0	0	0	0	0	1	0	0	0	0	0	0	0	0	0	0	0	0	0
AFUA_1G17610	0	0	1	25	7	2	1	5	3	0	4	0	13	14	3	9	2	4	0	0	0	4	4	1	1	0	2	0	0	0	4	0	0	1	1	0
AFUA_1G17620	10	1	11	30	15	20	137	86	120	0	0	3	52	46	11	129	109	95	11	6	8	68	27	34	131	88	47	5	4	2	39	70	24	95	96	48
AFUA_1G17630	0	1	0	24	26	7	12	6	8	0	0	0	38	22	22	6	11	4	0	0	1	28	13	13	6	14	0	0	0	1	53	52	8	8	12	3
AFUA_1G17640	60	49	54	7	3	3	59	43	32	35	51	33	7	2	6	44	36	17	29	14	15	6	3	5	51	30	15	22	24	19	4	3	1	31	19	2
AFUA_1G17650	8	1	2	4	5	5	8	12	5	2	4	0	6	8	6	9	28	11	3	8	3	5	3	4	8	11	2	6	0	10	6	6	4	17	21	23
AFUA_1G17660	3	1	1	10	5	10	12	10	17	1	0	0	8	1	10	4	7	6	0	0	0	6	11	17	9	11	18	0	0	0	15	12	15	2	19	19
AFUA_1G17670	5	4	2	0	2	1	1	0	1	9	4	6	5	8	1	1	2	1	0	0	0	1	0	0	0	0	0	0	2	0	3	3	0	0	0	0
AFUA_1G17680	253	173	177	30	34	13	207	183	143	166	122	92	25	35	25	208	117	75	52	35	43	47	35	21	181	104	110	50	71	47	62	64	14	193	125	48
AFUA_1G17690	187	146	174	34	34	23	13	18	9	278	199	193	24	33	13	28	21	13	49	75	74	39	25	14	13	13	14	122	122	119	29	56	5	9	14	2
AFUA_1G17700	5	11	4	24	5	22	56	58	71	4	0	5	85	37	16	108	36	43	8	2	1	48	19	29	22	28	35	2	9	2	71	102	22	57	88	51
AFUA_1G17710	0	0	0	0	0	0	0	0	0	0	0	0	0	0	0	0	0	0	0	0	0	0	0	0	0	0	0	0	0	0	0	0	0	0	0	0
AFUA_1G17720	0	0	0	0	0	0	0	0	0	0	0	0	0	0	0	0	0	0	0	0	0	0	0	0	0	0	0	0	0	0	0	0	0	0	0	0
AFUA_1G17723	0	0	0	0	0	0	0	0	0	0	0	0	0	0	0	0	0	0	0	0	0	0	0	0	0	0	0	0	0	0	0	0	0	0	0	0
AFUA_1G17725	0	0	0	0	0	0	0	0	0	0	0	0	0	0	0	0	0	0	0	0	0	0	0	0	0	0	0	0	0	0	0	0	0	0	0	0
AFUA_1G17730	1	0	0	0	0	1	0	0	0	0	0	0	1	1	0	0	0	0	1	0	0	0	0	1	0	1	0	0	0	0	0	0	1	0	1	0
AFUA_1G17740	0	0	0	0	0	0	0	0	0	0	0	0	0	0	0	0	0	0	0	0	0	0	0	0	0	0	0	0	0	0	0	0	0	0	0	0
AFUA_1G17750	0	0	0	0	0	0	0	0	0	0	0	0	0	0	0	0	0	0	0	0	0	0	0	0	0	0	0	0	0	0	0	0	0	0	0	0
AFUA_2G00090	0	0	0	0	0	0	0	1	0	2	0	0	1	0	1	2	5	0	1	1	0	0	4	1	1	2	4	2	0	0	4	1	1	1	6	3
AFUA_2G00100	662	433	499	3528	4180	2788	7818	6902	6922	586	560	529	4296	3314	3057	7082	6635	5850	735	452	649	6002	3707	3699	7182	5116	6977	382	393	283	4531	4919	2503	5636	8082	4305
AFUA_2G00110	14	12	12	107	119	25	133	116	93	26	14	11	66	51	75	86	93	84	7	2	5	66	40	56	108	85	253	4	7	7	30	57	35	81	194	104
AFUA_2G00120	7	7	7	14	3	7	61	54	59	8	18	7	5	1	10	79	63	60	13	3	1	3	15	8	37	51	18	2	0	1	1	6	8	48	92	16
AFUA_2G00130	18	43	24	21	51	6	0	4	1	27	30	41	36	42	0	3	1	4	77	66	84	77	37	6	2	3	0	52	43	22	21	29	0	0	6	0
AFUA_2G00140	3	3	0	41	53	12	2	0	3	5	1	3	68	72	20	3	6	3	0	3	4	121	57	5	3	1	12	2	3	1	56	95	9	2	8	3
AFUA_2G00150	8	3	1	86	80	7	0	0	0	5	0	1	95	77	13	2	1	1	3	1	18	160	81	10	4	0	16	4	2	1	69	96	1	2	9	5
AFUA_2G00160	2	6	3	2	0	6	0	0	2	3	0	0	0	0	0	1	1	3	0	1	0	0	2	0	1	1	8	0	0	0	0	3	0	0	3	3
AFUA_2G00170	12	11	22	3	5	3	2	4	8	5	7	7	0	0	1	1	5	0	21	7	10	0	3	0	2	5	4	13	18	18	4	10	0	0	2	0
AFUA_2G00180	4537	4212	5396	1966	2483	1131	440	444	1107	3321	2647	2269	625	1024	1236	370	1278	637	1708	1493	1760	510	501	552	1423	1030	1114	4751	5074	5611	2072	812	1109	123	786	606
AFUA_2G00190	63	52	58	0	0	0	0	0	0	56	119	81	0	0	0	0	0	0	29	55	20	3	0	0	0	0	0	42	50	41	0	0	0	0	0	0
AFUA_2G00200	22845	28662	30823	8	15	2	31	64	163	31826	40936	45055	9	29	1	120	123	190	24049	25538	23552	48	22	0	43	27	113	24899	34183	23110	30	35	0	77	118	15
AFUA_2G00210	32576	30903	45215	913	2432	854	38564	27819	28165	19456	23913	24616	994	1832	1295	26281	21827	23155	31800	32128	32336	2741	4161	2071	31265	48147	35450	48618	51416	37960	4685	3833	1302	25450	38632	13206
AFUA_2G00220	7519	6163	8307	1386	1324	2809	4961	4435	2963	5585	6906	5371	3533	2873	2792	4077	3506	3227	7096	6592	5164	4167	2504	3345	3627	4022	2331	5460	6016	7279	2572	4088	2322	4404	5112	1674
AFUA_2G00230	341	195	271	82	138	130	241	281	325	102	65	61	82	102	154	294	275	385	209	168	222	91	101	118	208	303	241	185	168	187	96	100	124	265	649	194
AFUA_2G00240	109	113	115	203	348	96	472	414	502	72	84	59	262	391	117	494	374	342	28	33	27	165	210	121	486	936	370	54	81	81	244	271	134	409	748	223
AFUA_2G00250	8	13	8	18	15	4	4277	3543	1501	15	9	17	57	49	14	4125	1929	1206	2	3	4	119	80	9	2680	3208	373	5	6	6	398	549	7	4498	3070	422
AFUA_2G00260	741	636	463	30	16	40	280	188	64	1434	1247	632	80	66	32	194	102	55	101	85	67	82	42	49	84	155	43	167	260	266	90	116	22	221	122	30
AFUA_2G00270	4031	3134	2555	34	23	17	126	121	69	4610	3646	2113	32	26	28	110	85	36	808	762	729	47	47	29	84	91	47	1079	1479	1789	70	63	15	63	115	10
AFUA_2G00300	1216	1238	1399	60	73	86	178	193	146	1503	1448	1376	128	107	91	180	172	140	1042	1179	1053	151	79	118	162	120	127	984	1164	880	147	201	74	189	193	93
AFUA_2G00310	1936	1622	2405	1078	1434	1016	2032	1390	1548	2055	2486	1720	1459	1264	906	1328	1419	1163	2755	2560	2888	1765	1130	1149	1531	1228	1637	2436	2285	2076	1235	1612	941	1692	1516	1002
AFUA_2G00320	41	31	42	3982	6062	2284	274	252	1785	26	34	29	2571	2845	2703	251	1418	1652	26	15	10	4444	4418	2930	1051	447	1822	24	44	22	5566	5037	2889	253	1809	896
AFUA_2G00330	53	23	71	745	932	308	549	618	923	26	17	8	303	356	347	714	869	692	47	32	49	338	331	336	622	345	437	53	34	71	431	385	272	368	626	298
AFUA_2G00340	106	85	134	24	28	81	152	97	44	51	78	84	68	30	60	72	60	33	423	468	447	82	63	66	44	95	23	309	217	121	76	60	43	107	67	29
AFUA_2G00350	58	31	47	23	16	20	66	39	19	20	34	41	26	28	21	29	32	14	198	86	215	65	19	40	17	26	14	122	59	59	22	25	24	16	16	12
AFUA_2G00360	2742	2193	3389	487	549	460	833	628	705	1647	1942	1639	573	570	594	594	572	647	2190	1780	2196	771	628	615	646	704	706	3214	3515	3291	587	655	425	613	897	501
AFUA_2G00370	1544	1123	1664	843	845	863	1367	1237	1328	822	1102	1021	701	707	882	1317	1223	1160	1088	1049	995	977	625	999	1285	757	1372	1388	1497	2042	789	685	684	1145	1359	987
AFUA_2G00380	6	4	4	16	18	19	34	24	25	3	2	1	47	25	13	19	15	7	0	1	1	29	25	12	24	14	6	0	0	0	10	50	12	29	26	3
AFUA_2G00390	1	4	3	1	2	5	2	2	3	1	7	0	0	3	10	1	1	0	1	1	1	4	2	5	0	0	0	1	0	2	24	2	12	3	2	2
AFUA_2G00400	0	1	2	4	4	5	5	2	9	1	1	3	2	3	3	3	2	3	0	0	3	3	5	5	11	1	4	0	1	2	12	2	1	0	6	2
AFUA_2G00410	29	25	25	22	34	76	95	73	65	14	17	20	116	84	44	72	60	47	8	3	6	106	52	83	83	39	33	11	16	15	25	59	50	105	52	27
AFUA_2G00415	0	0	0	1	0	3	0	0	0	2	0	0	1	0	3	5	2	0	0	0	0	1	0	0	0	0	0	0	0	0	0	0	0	2	0	0
AFUA_2G00420	54	44	48	181	157	50	31	52	102	21	23	11	82	77	39	38	103	58	7	11	15	60	26	38	58	21	105	17	17	23	36	39	39	31	40	82
AFUA_2G00430	45	56	76	9	0	4	2	0	1	36	51	43	4	3	1	0	5	4	13	14	25	1	1	1	0	5	4	56	83	152	2	0	4	0	3	7
AFUA_2G00440	23468	23682	27246	37	59	65	11	19	53	29296	31459	32155	47	28	55	34	52	102	14193	25041	13493	119	78	80	32	5	61	20952	29775	20601	186	171	107	33	57	32
AFUA_2G00450	82	47	63	21	21	10	18	4	20	76	84	54	16	14	15	8	9	14	14	21	10	13	18	14	9	14	27	15	33	87	88	29	44	7	8	23
AFUA_2G00460	6	11	16	8	5	1	1	0	2	7	9	14	4	3	7	1	0	9	7	21	9	7	2	7	1	4	13	19	16	29	2	8	1	1	2	10
AFUA_2G00470	153	217	231	8	2	20	4	0	7	212	215	259	0	2	22	2	3	4	260	317	233	5	2	9	3	0	5	346	264	152	29	5	26	0	11	8
AFUA_2G00480	37	38	58	3	6	6	25	26	6	69	41	72	3	3	1	15	7	18	50	46	28	0	4	0	8	22	7	37	35	43	12	4	0	13	6	6
AFUA_2G00490	1	2	1	7	5	0	2	6	6	0	0	0	2	6	4	2	10	5	13	1	6	8	4	4	1	0	9	5	2	3	1	3	3	14	19	10
AFUA_2G00500	0	0	0	42	43	308	1021	544	201	1	0	0	106	87	365	323	188	161	0	0	0	102	74	208	263	381	55	2	2	0	360	150	390	630	266	160
AFUA_2G00510	20	4	4	3	3	0	10	3	7	7	2	3	1	2	3	7	5	15	3	1	1	0	0	0	2	0	1	1	4	7	1	3	0	7	13	2
AFUA_2G00520	2	0	1	38	60	47	32	23	41	2	6	0	119	111	37	32	30	53	2	0	0	148	72	33	27	34	5	0	2	0	76	120	21	26	92	6
AFUA_2G00530	3	0	1	49	64	25	82	61	135	4	2	0	65	64	15	60	93	133	0	0	0	62	51	26	133	48	99	0	1	0	23	40	20	59	113	42
AFUA_2G00540	4	2	0	47	52	16	57	24	57	0	0	0	26	52	15	39	44	43	0	0	0	59	41	11	58	36	62	0	0	0	28	49	9	37	42	32
AFUA_2G00560	11	11	28	2	7	0	22	14	5	12	17	7	0	2	1	5	1	5	5	5	6	1	4	0	17	19	1	9	14	6	7	2	0	15	9	0
AFUA_2G00550	3	5	4	0	9	5	38	20	3	4	2	5	1	2	0	20	4	2	2	4	2	2	6	0	9	22	0	3	4	9	3	3	0	21	11	0
AFUA_2G00570	37	31	29	166	215	151	372	230	219	26	22	15	237	278	175	261	196	184	22	22	27	254	174	236	311	269	246	12	30	19	192	180	167	312	267	198
AFUA_2G00580	36	35	25	34	74	10	50	49	52	16	18	29	15	29	19	76	99	45	42	43	35	17	25	8	46	188	58	26	22	33	28	17	15	48	70	65
AFUA_2G00590	652	378	515	381	474	189	233	204	347	450	417	326	219	295	199	234	329	301	495	448	420	538	991	251	274	341	498	430	414	378	1256	835	287	215	570	545
AFUA_2G00600	4	2	1	2	4	3	3	5	1	1	3	0	2	0	2	2	0	1	4	0	0	2	3	0	5	5	3	0	3	8	5	3	0	4	4	7
AFUA_2G00620	8	4	6	2	6	3	2	3	3	7	2	0	2	6	2	17	6	1	2	1	1	3	0	4	3	6	6	2	2	14	5	9	4	0	10	0
AFUA_2G00625	37	18	18	13	10	2	2	13	4	11	23	3	1	14	6	4	5	0	2	6	3	10	2	0	10	0	10	12	16	22	6	10	0	3	7	4
AFUA_2G00630	231	147	150	10	29	1	35	21	26	106	89	50	8	7	3	27	22	13	34	32	40	7	5	15	20	22	11	44	43	81	21	22	12	26	35	18
AFUA_2G00640	4	9	5	57	54	34	99	187	154	8	4	1	158	96	31	313	151	136	28	24	29	193	66	40	200	61	99	7	4	3	50	76	10	108	110	85
AFUA_2G00650	76	47	74	53	101	36	140	82	77	39	45	40	87	94	56	95	73	70	31	42	42	121	119	70	98	74	67	74	71	41	173	233	74	105	121	58
AFUA_2G00655	0	0	0	0	0	0	0	0	1	2	0	0	0	0	0	0	0	0	0	0	0	0	0	0	1	0	0	0	0	0	0	0	0	0	0	0
AFUA_2G00656	3	0	3	2	11	6	14	4	5	3	1	0	4	0	5	7	21	1	1	0	1	5	0	12	3	8	0	0	0	3	4	6	8	7	11	0
AFUA_2G00660	446	331	432	1383	1835	857	1298	860	1511	179	203	98	1009	1112	910	763	1062	1201	372	189	310	1559	1350	1162	1368	1780	1233	166	205	240	1136	947	1036	610	1090	874
AFUA_2G00670	287	187	262	61	115	42	97	74	53	173	107	71	87	84	66	65	50	42	317	260	258	111	79	84	60	73	67	123	111	102	76	85	47	91	86	37
AFUA_2G00680	303	151	205	684	859	993	484	413	649	131	58	27	1557	1413	920	410	496	603	215	143	207	2081	1069	1271	254	324	299	142	136	175	996	1684	1220	489	900	182
AFUA_2G00690	87	48	73	351	360	431	145	126	122	126	91	58	963	764	333	234	194	127	58	56	44	2458	1545	1393	188	90	167	40	53	43	461	1372	410	246	154	231
AFUA_2G00700	0	0	0	10	18	17	34	21	11	0	0	0	19	13	14	46	17	17	0	0	0	86	24	27	16	8	7	0	0	0	24	27	16	13	14	0
AFUA_2G00710	2	2	3	350	332	243	247	156	140	0	0	0	382	335	210	248	173	98	1	0	5	1190	860	527	148	71	149	3	0	7	646	743	258	230	144	121
AFUA_2G00720	42	9	20	3854	3455	13036	2166	2147	1951	2	3	5	9919	7938	12217	2486	2381	2001	42	52	52	8795	6159	13445	1663	1220	1431	29	4	23	12224	11668	14129	1920	3219	1000
AFUA_2G00730	2	1	1	338	384	537	973	759	644	0	3	3	802	711	581	1033	736	657	5	2	4	872	516	622	760	406	696	0	3	2	894	839	593	936	789	624
AFUA_2G00740	10	9	18	439	531	1028	879	894	1523	8	7	2	1267	1143	954	1270	1446	1031	16	2	12	1249	773	1004	1210	286	1348	4	3	8	1083	1112	1031	721	851	1822
AFUA_2G00750	24	19	25	74	104	146	264	184	135	7	6	7	159	168	157	194	149	87	20	10	8	147	160	154	162	101	145	13	0	20	251	189	227	146	141	62
AFUA_2G00760	71	51	70	156	264	89	159	143	209	47	45	63	148	143	55	126	138	180	50	53	36	187	148	114	236	170	235	63	72	76	182	198	121	191	314	148
AFUA_2G00770	277	253	300	2193	3746	1021	1140	1361	3748	202	212	190	1760	2188	872	1275	2264	3475	234	238	169	1852	1452	1737	2442	2145	6462	281	317	315	667	1346	1222	2092	4215	3225
AFUA_2G00780	2180	1539	1980	1204	1736	760	852	794	1289	1736	1681	1187	1271	1400	662	770	1182	920	797	498	623	1303	954	885	1449	1075	1371	1080	1373	1731	733	1080	639	798	1525	367
AFUA_2G00790	2210	1469	2246	2123	2357	1135	412	1481	5350	1889	1589	1363	2981	3262	1460	1160	5142	5566	1918	2532	2055	4273	2897	1841	3392	840	7698	3400	3754	3313	3760	6786	1453	2473	7607	5078
AFUA_2G00800	798	712	837	36	64	44	87	85	88	401	456	238	29	42	68	74	111	73	187	231	151	51	34	69	91	49	104	328	541	688	28	60	44	75	176	57
AFUA_2G00810	57	40	36	12	25	26	45	37	39	15	17	24	23	33	16	22	40	38	23	15	19	25	28	37	56	35	37	25	28	48	27	22	14	78	98	21
AFUA_2G00820	211	116	147	45	66	22	65	40	31	75	86	60	27	18	20	54	47	43	60	71	69	36	29	32	56	32	33	125	155	207	31	46	14	47	84	32
AFUA_2G00830	380	239	361	103	141	115	1038	1102	1199	211	174	176	258	261	172	1176	1310	1200	214	223	238	409	310	204	889	549	917	228	232	285	564	607	151	1064	1211	757
AFUA_2G00840	225	163	152	369	678	632	963	1592	1267	84	98	66	1865	1477	866	2254	1777	1295	183	124	222	2998	1563	1497	1120	140	887	123	135	163	1246	2424	451	1571	1656	496
AFUA_2G00850	7	3	5	48	48	100	197	159	120	2	3	1	88	76	82	133	108	81	24	11	17	164	83	79	232	105	122	8	10	0	114	184	95	279	64	64
AFUA_2G00860	13	14	24	75	95	148	93	87	82	18	33	21	104	96	132	110	107	43	8	8	10	127	84	153	91	43	88	7	22	9	198	132	163	94	101	56
AFUA_2G00870	11	2	5	88	116	134	262	318	268	2	3	2	498	413	97	467	306	205	1	4	0	188	113	87	179	63	192	0	0	2	219	298	74	260	202	179
AFUA_2G00880	3	7	15	73	79	69	60	65	61	10	6	1	55	52	76	90	76	31	15	19	8	65	31	85	73	31	67	27	10	19	33	41	67	24	60	35
AFUA_2G00890	383	278	317	64	122	70	50	56	75	136	111	125	65	49	64	77	81	66	312	373	272	74	20	96	90	73	65	383	421	284	31	55	48	77	146	67
AFUA_2G00900	34	28	44	15	16	10	18	6	6	30	7	13	9	5	16	19	7	1	21	10	20	21	8	13	16	24	0	59	67	66	12	14	8	13	27	1
AFUA_2G00910	5	6	4	10	12	13	71	57	20	1	0	0	26	27	18	28	19	6	4	7	1	32	25	16	23	49	36	8	2	6	32	16	2	37	22	17
AFUA_2G00920	21	18	8	5	12	5	14	18	0	22	5	8	14	25	2	8	4	2	3	3	0	12	8	7	16	6	10	2	5	13	5	9	3	25	1	7
AFUA_2G00930	4	6	1	33	14	9	6	6	8	7	5	3	55	44	9	7	7	13	2	0	0	60	29	7	16	15	9	3	4	6	49	51	14	27	3	1
AFUA_2G00940	1800	2142	1910	108	161	135	327	226	180	1733	1910	1646	173	180	144	184	126	119	1061	926	1008	164	113	148	154	193	141	1801	2264	1628	110	159	171	203	196	169
AFUA_2G00960	95	86	97	229	272	140	1156	829	374	36	34	25	298	303	179	655	459	291	57	40	60	366	238	227	442	373	617	70	89	80	265	315	89	678	772	243
AFUA_2G00963	39	23	20	50	84	34	216	142	79	7	8	7	145	133	55	115	111	64	21	21	13	184	142	75	127	122	128	23	28	40	102	136	32	177	91	49
AFUA_2G00967	65	54	60	1115	1056	3518	4742	4432	3576	74	95	73	2882	2528	3921	6914	3994	3595	64	76	54	4210	2994	5092	2920	3890	2916	84	101	85	2832	4366	2124	5064	7426	2865
AFUA_2G00970	547	408	595	391	541	492	389	350	437	529	500	525	554	523	447	324	408	444	385	431	342	775	461	636	400	431	709	441	551	362	528	932	485	485	650	657
AFUA_2G00980	0	2	5	149	143	94	197	195	158	5	1	9	44	136	94	163	117	152	0	1	7	60	35	99	105	81	190	4	2	0	65	51	82	147	178	134
AFUA_2G00990	11	7	13	140	231	142	154	155	202	5	5	2	119	139	98	191	211	114	4	2	4	155	88	94	130	54	401	5	6	8	128	197	116	170	168	522
AFUA_2G01000	70	23	45	331	551	252	313	243	441	60	29	30	241	257	272	310	409	252	28	21	38	289	123	267	574	368	442	17	29	15	101	176	173	103	317	90
AFUA_2G01010	2187	1759	2196	16592	17382	31300	3556	2813	6349	1528	1318	1247	24011	23443	26118	2828	4503	6048	1879	1383	1639	36514	23502	34735	3520	3399	6131	1395	1242	1267	27953	23439	38126	3039	6522	5905
AFUA_2G01030	62	33	55	128	143	166	453	365	250	17	15	11	354	328	159	423	254	217	77	39	72	500	333	349	365	277	177	43	45	59	342	325	162	500	341	168
AFUA_2G01040	3254	2226	2873	1689	2328	3223	5752	5289	3858	2093	1926	1466	3904	3244	3195	6336	4098	3366	1537	1438	1505	5156	3728	3682	4223	5051	2187	1758	1994	1981	4724	4924	3218	6156	5098	2337
AFUA_2G01050	4322	3404	4729	2855	3548	2973	2149	1761	2785	3106	2956	2738	2514	2610	2736	1854	2318	2279	4310	4105	4034	2875	2025	3303	2224	1879	2624	4262	4168	3852	1902	2706	2334	1399	2810	1617
AFUA_2G01060	1172	745	1346	2751	3220	1864	2546	2340	3274	598	507	367	1829	1892	2058	2411	2724	2464	786	402	784	2010	1323	1893	2813	1987	2544	799	738	893	1278	1424	1294	1451	2678	1645
AFUA_2G01070	157	96	104	653	710	389	613	437	598	40	42	22	606	526	481	520	591	477	158	114	102	588	385	585	635	355	505	48	20	80	414	585	412	512	512	401
AFUA_2G01080	360	251	287	861	844	673	1201	891	1071	202	172	144	1018	926	502	980	1011	693	294	208	246	1006	568	610	1496	583	717	183	189	244	574	830	439	807	744	404
AFUA_2G01090	494	282	370	514	533	693	838	622	887	237	144	143	839	666	585	726	921	625	603	156	500	903	535	570	992	582	496	355	284	318	601	800	587	543	594	289
AFUA_2G01100	3176	4407	5960	2057	3965	1013	96	135	583	851	1069	1114	802	1520	1024	175	474	544	2162	2501	1836	725	784	373	129	437	596	2681	2869	2529	1372	2175	558	76	732	872
AFUA_2G01110	321	182	217	474	310	243	261	275	392	226	164	100	290	267	278	236	308	287	125	133	125	406	238	296	420	716	348	142	197	255	224	313	189	175	438	163
AFUA_2G01120	217	255	369	690	559	432	502	521	918	118	88	89	354	380	412	500	664	695	217	142	237	481	205	513	752	1269	818	274	241	211	254	296	294	236	926	532
AFUA_2G01130	635	423	629	1781	1781	1145	1828	1767	2228	435	393	257	1158	1155	1251	1850	1889	1484	731	647	588	1375	1004	1449	2201	3161	2365	383	322	375	1255	1597	1257	1487	2429	1816
AFUA_2G01140	161	155	130	13309	15150	6107	4130	5482	12576	154	97	99	2443	6132	7430	5690	10030	12268	259	128	148	2107	1626	6239	8153	4906	14730	144	161	107	1859	2009	4193	1620	12203	11569
AFUA_2G01150	198	156	143	1544	2269	837	797	1141	1422	211	154	93	313	609	1117	1048	1559	1149	96	37	61	461	359	1024	1881	864	2303	69	119	90	429	429	715	318	2105	768
AFUA_2G01160	146	84	81	1646	1650	663	683	1107	1551	125	79	86	313	616	831	1136	1422	1016	47	59	44	435	326	766	1616	1560	1702	60	72	75	562	599	458	478	2855	936
AFUA_2G01170	287	198	216	20907	45234	10719	5673	7250	15649	259	107	74	9669	12058	12496	7209	13101	13301	351	162	206	11482	5903	12401	10025	6057	26159	182	206	167	5566	9358	8104	4414	14083	17072
AFUA_2G01180	19	8	6	459	468	177	248	316	395	10	10	3	187	187	191	363	396	237	18	13	28	237	107	180	398	185	254	6	7	13	151	174	134	159	327	95
AFUA_2G01190	49	12	37	1614	1198	683	573	489	557	28	20	3	404	510	756	425	489	319	6	17	13	461	343	1037	603	393	1080	12	5	17	342	360	693	872	528	301
AFUA_2G01200	2954	2604	3695	1323	1244	1039	1357	1057	1076	1719	1544	1364	1061	1021	988	1044	1079	824	1959	1479	1808	1461	931	1213	1123	828	930	1836	1715	2320	1147	1023	879	688	963	666
AFUA_2G01210	3560	3621	4919	2563	3036	2332	2427	2215	3224	1680	1380	1194	3261	2797	2428	2635	2935	2703	2735	1774	2308	3538	1995	2893	3105	2608	2613	1906	1701	2800	2039	2929	2135	1944	3583	1995
AFUA_2G01220	1599	1335	1576	2457	2585	3989	4953	4338	4364	1106	1017	1115	4732	4190	4190	4531	4381	4235	2186	1650	1877	8126	6146	5457	4113	3870	3076	1383	1368	1168	7027	7008	4675	5284	5672	2952
AFUA_2G01230	3254	1608	2105	93	93	168	421	354	364	3532	4077	2592	190	157	143	386	325	314	869	1040	736	243	209	260	289	212	219	1029	1164	1722	265	241	200	443	436	192
AFUA_2G01240	776	441	677	147	227	180	133	125	162	478	485	295	369	294	179	148	121	131	181	182	185	386	247	219	101	97	235	295	366	517	297	342	151	128	176	276
AFUA_2G01250	2728	2302	2589	1690	2776	1284	353	392	706	2224	2324	1498	1040	1360	1849	357	689	794	925	645	788	2023	2129	2195	556	634	1626	1425	1883	2161	1766	1875	1674	634	1832	674
AFUA_2G01260	1193	812	1158	3799	6887	2694	1474	1704	3272	552	384	313	2405	2556	3797	1474	2871	3090	515	271	479	3297	2238	3627	2645	2798	2899	890	1156	1111	1693	2116	2926	933	3854	2348
AFUA_2G01270	508	360	449	440	520	136	193	233	568	412	310	248	259	286	124	504	464	645	475	313	399	375	229	135	333	282	454	337	392	426	274	442	142	118	724	180
AFUA_2G01280	37	33	53	73	92	33	678	431	216	30	25	17	53	68	31	602	179	204	44	15	29	101	56	53	427	405	121	20	15	11	276	147	34	313	298	108
AFUA_2G01290	279	185	189	392	447	196	787	693	530	192	170	117	592	486	184	757	497	369	160	84	78	618	369	206	770	392	435	89	105	96	358	470	188	664	531	199
AFUA_2G01300	18	8	20	227	237	126	292	294	217	19	14	21	340	253	115	382	273	146	18	14	13	243	139	162	320	183	163	7	2	2	185	337	125	346	228	150
AFUA_2G01310	46	22	48	724	788	829	1312	1320	1232	20	31	50	1685	1433	852	1622	1346	1149	59	31	49	1391	896	990	1060	806	1378	35	26	21	1261	1553	743	1498	1757	1427
AFUA_2G01320	577	412	478	2201	2552	3412	46199	28893	16209	723	718	644	2214	2422	2871	22449	15101	10004	779	424	639	3448	2525	3056	25955	31456	18216	206	275	256	3170	3142	1844	22874	15257	9062
AFUA_2G01330	411	346	464	768	680	412	627	617	928	187	147	111	716	782	469	656	879	809	293	184	227	838	419	603	1014	913	816	156	142	170	378	766	451	368	922	388
AFUA_2G01340	80	43	61	11	36	9	15	16	14	89	78	61	7	9	9	17	15	2	31	23	24	16	7	12	21	11	13	28	27	34	22	17	6	17	15	7
AFUA_2G01350	420	335	459	1518	1809	1004	1615	1372	2195	187	179	230	971	1138	799	1510	1789	2000	650	353	536	918	505	978	1786	1714	3080	369	344	329	584	752	676	626	2218	2580
AFUA_2G01360	976	630	752	194	221	244	231	222	247	568	525	439	318	273	248	288	288	261	499	473	415	284	179	280	344	182	209	475	545	538	222	309	237	229	324	178
AFUA_2G01370	93	39	59	155	122	47	106	84	99	15	11	16	144	137	63	120	90	85	34	18	23	185	96	118	62	56	122	29	36	36	121	134	49	57	94	71
AFUA_2G01380	45	22	27	235	230	164	495	444	550	21	11	3	131	183	174	534	495	317	27	31	37	171	74	196	679	856	227	29	35	10	122	187	115	351	495	172
AFUA_2G01390	182	113	138	746	780	714	827	978	2131	64	56	36	509	501	683	1231	1647	1641	104	58	80	538	376	693	2202	1308	1234	81	86	75	467	619	546	556	1871	648
AFUA_2G01400	105	59	78	409	435	300	227	223	302	40	29	16	286	256	280	262	370	386	99	91	87	273	210	316	242	269	285	70	55	60	294	340	261	177	345	193
AFUA_2G01405	21	15	8	32	40	29	346	206	89	10	13	10	29	27	57	213	146	44	13	9	19	31	34	39	112	127	65	10	22	22	21	25	38	176	177	10
AFUA_2G01410	36	18	24	1008	1412	529	3681	2400	1704	48	13	18	670	764	708	2833	2108	1236	14	20	13	959	826	741	2325	1734	1578	32	17	15	954	901	607	2750	2095	819
AFUA_2G01430	195	94	128	7356	11195	5659	17852	15256	13915	175	150	177	6117	7630	7680	17716	14932	10968	88	47	69	8820	7868	7991	17754	9096	14038	103	157	175	8483	9205	6045	12933	17962	6378
AFUA_2G01440	149	95	125	1305	1471	858	331	322	1034	52	68	50	1272	1265	733	574	936	869	93	55	68	1084	701	1185	1181	756	1537	36	41	65	455	796	977	165	1670	473
AFUA_2G01450	1383	1035	1406	910	907	1076	1164	1084	1517	971	1043	872	925	1093	1037	1205	1398	1452	838	768	767	1068	653	1191	1072	758	1335	819	809	838	616	863	836	745	1234	1023
AFUA_2G01460	149	118	119	565	481	753	477	471	553	36	28	21	948	860	737	623	644	572	107	106	86	1145	663	894	517	296	444	63	73	77	682	1082	740	538	631	432
AFUA_2G01470	39	26	44	108	121	255	125	119	137	17	4	5	251	193	212	102	146	140	33	27	30	283	160	265	128	64	144	24	10	22	186	196	200	83	139	90
AFUA_2G01480	1183	1400	1966	1072	1080	873	802	817	1929	391	267	371	815	923	882	1043	1851	1206	1271	1033	1076	871	503	1308	2030	2066	1455	682	592	603	273	700	729	427	1837	378
AFUA_2G01490	5	3	9	14	10	2	2	3	4	1	0	0	16	11	12	4	5	8	3	0	0	4	5	9	4	5	2	1	3	1	6	19	4	1	3	2
AFUA_2G01500	600	458	580	316	305	570	519	468	404	482	322	300	683	488	463	461	471	303	357	231	300	719	330	667	415	311	375	349	345	293	378	457	334	399	355	186
AFUA_2G01510	2102	1308	1800	175	146	244	297	188	177	1664	1250	969	348	277	209	227	185	151	1130	845	1060	312	200	250	182	139	201	1179	1514	1321	301	411	216	237	192	78
AFUA_2G01520	467	309	438	666	678	911	609	422	581	192	187	162	972	919	1011	425	477	403	302	108	271	916	415	952	605	325	295	269	264	276	515	522	832	245	476	209
AFUA_2G01530	352	227	250	723	771	1034	1236	909	1142	103	110	84	1198	1143	1037	1134	957	1126	430	257	370	1514	935	1333	1176	908	700	246	176	263	900	1281	934	1130	1047	768
AFUA_2G01540	559	310	491	865	951	1077	1981	1555	1801	258	224	146	1548	1414	1212	1746	1686	1412	800	629	727	1898	1025	1487	1862	955	1270	542	377	521	1126	1321	1029	1379	1481	842
AFUA_2G01550	3889	3418	4788	1880	2204	1781	3178	2161	2069	1934	2190	2229	1679	1799	1839	2154	1809	1888	8200	5902	8540	2071	1486	1927	2036	1756	2076	5147	3912	3553	1935	1871	1631	2095	2029	1524
AFUA_2G01570	2117	1446	1882	905	1136	821	790	687	714	1498	1195	872	1048	898	776	850	759	561	1887	1509	1584	867	581	1024	826	611	562	1189	1333	1202	579	946	633	783	885	296
AFUA_2G01580	3692	3236	3337	196	207	211	499	370	277	2630	3077	2413	390	241	227	404	256	259	3461	3152	3482	400	209	233	346	291	181	2573	2489	2238	282	384	203	555	357	188
AFUA_2G01590	34313	29779	33401	1086	1446	584	422	516	1317	37325	33725	30666	1038	1259	624	678	988	1338	22500	21371	21807	1351	794	688	1080	667	2272	26469	34025	21960	1001	1564	528	662	1773	844
AFUA_2G01600	85	63	92	567	659	557	672	607	622	41	20	32	692	666	698	663	522	560	46	98	50	615	406	838	498	462	685	40	45	50	424	707	454	589	829	407
AFUA_2G01610	199	133	189	851	1101	1148	1359	1218	1644	90	91	102	878	900	1457	1142	1347	1395	171	53	122	1100	694	1376	1357	1081	1437	136	115	143	525	675	910	662	1647	1090
AFUA_2G01620	1609	1071	1002	455	777	559	865	892	903	976	785	471	424	444	577	773	970	559	1113	985	1138	595	360	839	1178	496	1149	736	776	631	287	489	395	650	1199	436
AFUA_2G01630	3967	3807	5021	1084	1224	968	871	720	1121	4317	5061	4712	722	869	1161	655	906	947	5608	4845	5407	692	569	1200	746	915	1466	4930	4731	3684	619	780	826	553	1257	934
AFUA_2G01640	1883	1592	2224	2368	2564	3114	1900	2232	3349	775	645	592	3352	2944	3031	2575	3036	2937	1731	1340	1741	3301	1878	3616	2468	2584	2553	1134	854	1274	1584	2543	2372	1338	3963	1547
AFUA_2G01650	142	110	125	214	214	381	127	123	159	93	121	78	343	268	358	123	150	191	317	154	255	497	279	385	141	79	92	127	91	83	190	308	314	145	202	72
AFUA_2G01660	3464	2887	3641	2393	2593	2233	1506	1200	2326	2424	2549	1896	2973	3061	2902	1151	1545	2291	2389	1288	1939	3978	2439	3051	1532	1315	2828	1841	1885	2169	1977	2319	2717	1175	2054	1726
AFUA_2G01670	5177	4166	5173	1310	2880	1794	3720	2644	1779	3710	3513	3330	1850	1526	1909	2171	2076	1411	3963	2561	4419	2679	1681	2237	2914	1727	2639	5114	6047	5387	1862	2356	1556	2679	1994	1466
AFUA_2G01680	702	500	354	33	44	38	821	492	141	549	506	310	130	90	43	530	225	85	162	130	129	160	193	34	247	201	82	108	152	201	273	273	17	401	246	34
AFUA_2G01690	39	36	33	40	80	55	174	134	123	16	20	11	106	63	85	164	80	62	34	12	19	138	62	80	165	79	46	25	19	24	132	113	60	179	115	46
AFUA_2G01700	3723	3342	5204	3939	5156	2958	2684	2527	3885	2210	2590	2498	2772	3243	3175	2536	3259	3267	2351	1815	2280	4030	3501	3409	3711	3124	5414	2975	3221	3170	3600	3510	3129	2375	3497	3361
AFUA_2G01710	538	297	360	1191	1309	622	501	521	724	298	239	178	450	640	521	569	539	489	432	367	370	434	478	653	608	641	1284	305	258	330	549	490	475	404	862	796
AFUA_2G01720	886	671	915	3262	3585	2168	3320	2617	4467	702	604	533	1746	2741	2809	2783	3370	3453	606	486	558	1606	2131	2656	2487	7140	5072	685	625	802	2353	2080	2408	2119	6257	3762
AFUA_2G01730	8967	7477	9103	89	72	86	130	133	123	13289	17647	13266	200	156	109	146	110	115	2177	3717	1768	190	118	170	148	53	133	6574	8838	13503	147	246	73	136	183	65
AFUA_2G01740	129	57	109	193	187	257	174	167	217	107	105	99	262	238	234	204	204	189	278	187	301	387	192	238	209	103	333	278	190	242	221	311	223	134	196	146
AFUA_2G01750	5690	4766	6283	6161	5200	10096	16697	15342	15615	4094	3585	3691	10561	8719	11071	15783	16349	14297	7001	5872	5760	14322	7903	11676	15591	11943	6810	4796	4581	4247	9813	11265	11137	15443	14490	4497
AFUA_2G01760	713	525	599	253	411	322	941	675	529	464	362	247	336	304	412	755	606	341	275	116	231	617	405	394	740	516	540	282	359	362	422	420	254	575	672	465
AFUA_2G01770	55	42	41	45	33	33	126	144	303	27	36	35	62	46	19	244	346	141	105	89	82	63	22	25	286	45	208	31	28	59	42	59	13	117	132	380
AFUA_2G01780	264	266	470	1208	1315	1010	725	814	2591	74	90	129	923	1088	1013	1245	2169	2355	557	505	520	1269	818	1492	2255	2156	2573	133	107	149	460	822	973	516	2393	1608
AFUA_2G01790	1093	689	825	4708	3993	2730	1402	1477	3263	682	742	562	4021	4150	3422	1721	2905	2818	1302	1084	1361	4859	3331	4036	2191	955	4253	585	524	778	2982	3783	3131	1411	2855	3492
AFUA_2G01800	68	50	73	89	111	83	55	56	55	60	67	26	50	94	96	55	47	32	42	17	33	53	52	103	74	44	50	38	42	73	59	66	71	95	95	30
AFUA_2G01810	3590	2750	3729	1288	1531	935	1113	992	1298	2532	2518	2266	1425	1484	1305	912	1122	1079	2127	2365	1900	1594	1299	1480	843	512	1829	2645	3249	3226	1753	2135	1218	1394	1443	1111
AFUA_2G01820	1476	1052	1731	1539	1671	1731	1676	1676	2000	693	677	634	1480	1528	1876	1559	1960	1690	1061	647	1067	2207	1343	2093	2229	1359	2378	1129	1183	1246	1127	1666	1421	1539	1831	975
AFUA_2G01830	1754	1520	2229	2272	2360	3093	1452	1385	2908	781	706	703	2501	2747	3430	1505	2328	2997	1793	1300	1707	3301	2260	4108	2166	2070	2611	1029	917	1048	1757	2572	3183	1357	3404	1606
AFUA_2G01840	1775	1038	1356	401	361	493	468	434	411	1118	960	560	589	453	462	412	347	317	1116	793	1134	606	336	460	318	243	337	921	1144	1097	363	538	408	363	415	187
AFUA_2G01850	149	173	200	488	446	984	1166	1067	934	127	136	105	964	803	850	1210	953	819	746	657	682	1340	923	1156	1015	660	803	280	178	203	1199	1366	968	1242	1140	618
AFUA_2G01855	0	0	0	1	0	0	0	1	0	1	0	0	0	0	0	0	3	0	0	0	0	0	0	1	0	0	0	0	0	0	0	5	0	0	0	0
AFUA_2G01860	539	283	313	309	376	531	486	408	410	192	118	132	684	541	529	514	451	313	296	268	294	825	411	744	406	250	275	334	305	387	401	777	495	486	448	150
AFUA_2G01865	0	0	0	0	0	0	0	0	0	0	0	0	0	0	0	0	0	0	0	0	0	0	0	1	0	0	0	2	0	0	0	0	0	0	0	0
AFUA_2G01870	347	308	457	5975	3435	2594	2386	2693	3692	333	190	146	1120	1095	2966	2626	4052	3244	229	157	258	1308	808	1974	1814	1145	3487	315	239	213	755	934	1509	754	3303	1570
AFUA_2G01880	705	999	1380	2533	1680	1162	1019	1175	2045	321	302	325	781	798	1304	1440	1947	1692	1232	956	956	982	567	1255	1301	804	1457	824	601	661	549	822	971	596	1954	1125
AFUA_2G01890	350	233	301	1632	1542	1126	318	297	724	261	241	216	1167	1566	1309	239	527	970	904	718	908	1645	1556	1481	356	275	739	285	208	201	1535	1438	1444	302	736	563
AFUA_2G01900	4608	3443	5011	1894	2118	1205	1742	1572	2488	2648	2496	2213	1199	1342	1343	1737	2183	1849	3180	2434	2877	1641	1004	1469	2256	1647	1705	3519	3638	4296	1050	1345	1202	1043	1953	915
AFUA_2G01910	186	86	138	1422	1819	1368	722	575	701	90	62	64	1807	1693	1362	530	619	567	148	78	101	2394	1366	1724	541	454	650	129	88	159	1117	1531	1239	679	702	358
AFUA_2G01920	402	287	470	2152	3470	2792	2713	2333	3483	198	230	204	2851	3028	2939	2628	3187	2888	1013	503	872	3945	2105	3634	3225	2751	2608	367	214	360	1616	2141	2702	1802	3560	1721
AFUA_2G01940	313	161	258	689	597	1072	1280	1073	1243	154	158	181	850	864	1200	1099	1101	1004	750	603	715	1444	1066	1445	1469	724	719	444	284	200	1251	1348	1474	1015	1015	424
AFUA_2G01950	32	4	25	136	154	143	218	215	250	7	2	7	154	129	101	213	241	192	100	84	64	200	89	128	298	115	191	37	23	50	145	151	163	131	229	156
AFUA_2G01960	22	9	19	163	201	81	490	443	431	9	11	21	100	87	89	588	347	270	18	10	18	127	90	66	872	157	171	10	6	26	95	126	53	376	260	55
AFUA_2G01970	265	165	185	204	238	144	388	284	313	121	99	84	243	192	175	290	268	162	126	57	105	171	132	190	295	129	179	131	137	107	112	215	171	224	222	153
AFUA_2G01980	688	776	1169	368	394	509	550	490	1529	171	162	172	347	357	484	706	1338	1175	1010	662	921	511	226	771	1577	1300	1135	546	407	683	195	257	440	307	1346	454
AFUA_2G01990	539	304	556	901	1118	986	705	713	941	154	75	80	962	958	896	1125	1079	844	627	499	482	1054	697	1167	879	404	1097	382	326	423	773	1007	762	640	976	675
AFUA_2G02000	1974	1901	2814	1537	1644	1060	1980	1499	1964	1367	1816	1872	1222	1263	1348	1411	1873	1528	3441	2362	3687	1458	1179	1431	2055	1503	2497	3197	3097	1987	1499	1481	1218	1518	2130	1557
AFUA_2G02010	2693	1942	2596	2483	2992	1715	2270	2188	3459	1602	1604	1137	2217	2253	1960	2283	2943	2830	1545	1554	1510	2375	1674	2023	2395	1496	3768	2160	2354	2386	2141	2980	1588	1904	3083	3027
AFUA_2G02020	9738	6117	8406	214	158	174	2857	2958	1499	5382	5122	3658	722	535	186	2872	1232	1217	4178	4859	5098	508	326	270	2159	1903	228	7775	8979	8477	697	855	156	3931	1661	232
AFUA_2G02030	572	483	488	120	116	154	79	62	33	246	239	163	267	218	145	60	46	61	264	329	252	316	139	145	53	44	42	354	382	607	185	249	160	59	58	29
AFUA_2G02040	124	77	76	95	91	87	117	96	102	34	42	37	87	62	62	101	74	82	53	28	47	72	67	56	113	69	138	60	47	104	71	70	38	174	180	67
AFUA_2G02050	715	578	835	2294	4222	2048	1387	915	1565	445	535	810	1383	1988	2334	691	1108	1587	1673	1158	1536	2969	3370	3000	652	1617	3599	834	579	512	2906	2269	2923	1531	2670	3870
AFUA_2G02060	11041	7228	7663	345	456	433	511	413	271	12596	9675	6861	337	331	416	369	344	133	2552	2476	2130	432	351	428	330	273	255	4300	5487	6356	416	537	450	391	340	121
AFUA_2G02070	1842	1341	1766	987	1043	1116	1646	1208	1570	1210	1027	791	1239	1234	1175	1448	1352	1219	1479	956	1495	1913	1089	1483	1743	858	961	1336	1295	1582	1155	1317	1236	1017	1240	841
AFUA_2G02080	349	251	288	6114	7027	3963	11283	10772	14932	216	147	162	2050	4199	4257	11619	14561	13790	169	126	196	2396	2369	5720	8310	9702	19295	181	256	213	1505	1653	3282	5869	16029	11097
AFUA_2G02090	120	55	121	194	203	170	365	236	223	58	43	21	225	231	208	296	287	182	53	76	62	242	154	187	260	262	239	68	52	74	204	252	158	319	274	128
AFUA_2G02100	2491	2082	2721	4603	3962	5447	4764	4157	8623	1890	1673	1587	6748	6595	6375	4617	6643	8252	2046	1480	1976	7898	5021	7198	6361	4617	5490	1657	1457	1601	5608	6593	6331	4275	8689	4493
AFUA_2G02110	781	506	479	426	409	300	586	420	379	392	253	172	319	301	233	432	402	298	269	177	236	449	262	313	366	346	329	185	291	369	343	408	263	354	503	228
AFUA_2G02120	798	473	717	1352	1584	983	453	388	457	495	313	252	1217	1112	980	405	498	479	291	137	217	1425	1014	898	585	561	532	325	390	306	1407	1250	1091	330	444	321
AFUA_2G02130	434	384	450	1192	1097	1137	1355	1075	1514	300	234	215	1386	1159	904	1182	1454	1263	387	203	390	1548	953	1100	1605	1074	1029	297	348	257	1000	1304	825	714	1191	842
AFUA_2G02140	1593	971	1172	301	257	294	411	294	352	1316	1070	961	388	339	350	386	337	287	927	757	766	465	259	473	487	317	206	1051	1098	960	254	385	316	298	281	175
AFUA_2G02150	2151	2267	2885	8403	7930	13396	2936	3112	5201	1232	972	759	17314	12785	11495	3310	4896	5989	2691	2440	1905	17450	7984	17905	4016	3774	3480	963	889	1063	5758	14530	13411	4275	7235	2223
AFUA_2G02160	1199	795	1202	650	706	653	1007	846	1175	563	445	396	865	802	821	999	1003	1028	692	400	651	930	559	998	908	664	922	708	665	783	589	741	754	731	1170	491
AFUA_2G02165	1595	1151	1440	656	793	835	438	413	621	984	623	526	959	826	847	435	474	530	1404	1515	1425	1063	535	1017	450	289	547	1169	1199	1300	527	872	703	356	600	340
AFUA_2G02170	164	83	137	2618	2767	3247	2253	1795	1938	38	29	34	3155	2905	3581	1983	1980	1718	224	88	170	4690	2662	3802	1955	1495	1456	163	116	160	2594	2845	3319	1597	2129	1007
AFUA_2G02180	1142	1229	1892	620	1467	631	2026	1142	1672	360	479	385	381	746	608	1200	1342	1117	768	427	720	516	434	650	1544	2833	1295	1182	1267	1376	506	390	603	724	1272	847
AFUA_2G02190	83	135	133	406	412	220	923	694	929	11	17	11	315	286	288	628	747	731	50	25	59	388	239	312	1246	1043	691	31	32	47	215	266	230	675	708	337
AFUA_2G02210	141	149	205	389	441	330	609	407	1067	62	49	36	423	409	357	551	909	795	183	149	186	568	259	544	1187	900	822	83	60	85	170	350	376	361	846	423
AFUA_2G02220	4975	4225	5750	3244	3923	2734	6349	4921	3928	2921	2731	2505	2633	2434	2770	4467	4201	3169	3090	1754	3067	4202	2873	2980	5053	4368	3530	4382	5192	4904	2979	2985	1978	3344	3828	1844
AFUA_2G02230	758	548	803	617	701	836	1009	808	751	343	343	280	1219	939	744	999	786	519	783	568	621	1279	718	1107	1030	787	485	391	393	449	665	1103	830	1003	747	301
AFUA_2G02240	599	504	659	361	495	517	851	693	597	267	293	288	597	416	536	750	643	451	574	446	414	786	504	626	809	626	527	474	473	559	689	710	532	828	776	347
AFUA_2G02250	623	439	499	799	1189	1771	3922	2552	2166	259	364	327	1478	1351	1794	2339	2171	1870	449	280	300	1488	1230	2050	2850	4317	1893	458	526	661	1292	1391	2009	6615	4770	1207
AFUA_2G02260	133	102	120	130	171	114	575	339	150	68	55	42	175	169	113	401	192	156	76	50	69	206	152	208	347	330	75	60	52	108	120	146	102	332	204	29
AFUA_2G02270	1530	1222	1523	1304	1380	1433	892	795	1283	768	744	727	1415	1522	1236	826	1111	980	1595	1719	1382	2003	1587	1809	959	919	876	978	823	778	1476	1892	1449	1013	1407	685
AFUA_2G02275	2932	2654	3316	2462	2837	4389	3058	2972	3589	2247	1672	1400	5031	4157	4292	2939	3149	2983	2865	3155	2659	4735	2979	6010	3028	2732	2168	1925	2053	1939	3055	5096	4327	3314	4099	2244
AFUA_2G02280	122	74	102	229	332	389	437	346	427	36	11	8	446	426	328	355	430	348	204	130	143	485	277	518	385	259	242	76	65	68	286	386	399	284	442	158
AFUA_2G02290	1422	1306	2430	794	1025	1323	610	581	1097	797	907	1102	1031	1081	1477	605	1094	927	2805	2269	2765	1356	641	1546	846	685	960	2838	2373	2254	539	845	1042	284	1136	503
AFUA_2G02300	851	727	823	393	587	363	468	545	592	496	418	357	550	482	480	525	651	578	722	1192	617	644	468	648	517	321	724	697	777	762	506	735	497	830	994	476
AFUA_2G02310	43730	33328	42195	5910	10963	8646	4046	6084	11039	35708	35597	32491	9855	9960	8947	4652	11636	11323	32661	32680	35789	12413	7682	11871	8284	2798	20001	46992	54201	39607	11648	15237	10060	10626	17633	12120
AFUA_2G02320	2276	2308	3598	3118	1970	2658	1795	1904	5053	871	827	770	4144	3640	2968	2539	4021	4507	2923	2904	2514	4108	2162	3355	3737	3305	3622	3517	3512	2912	1405	2856	2653	1139	4785	2384
AFUA_2G02330	56	52	65	2	8	4	1	2	1	21	35	30	4	5	0	0	6	2	68	116	69	3	4	2	8	3	2	128	143	146	0	1	5	0	11	3
AFUA_2G02340	403	425	644	493	415	530	647	601	771	210	194	229	787	574	520	691	684	523	1519	1526	1367	901	475	661	732	688	604	709	381	324	390	819	455	489	692	460
AFUA_2G02350	607	403	543	443	460	483	900	641	1193	275	238	188	582	576	495	664	966	889	520	346	420	688	441	673	1218	967	838	369	415	427	373	533	452	690	1311	605
AFUA_2G02360	694	421	559	590	587	1024	935	803	823	207	160	117	1145	900	921	819	840	749	564	282	454	1866	946	1456	1019	657	506	531	450	564	659	1106	907	1024	836	425
AFUA_2G02370	93	65	89	19	55	27	30	20	13	35	39	17	40	18	36	24	18	15	84	57	65	45	27	31	18	19	18	37	27	19	26	32	10	44	24	13
AFUA_2G02380	1580	1800	1676	1591	1928	1186	1004	924	1613	1778	1353	1236	2095	1923	1341	1018	1295	1353	1248	1418	1018	2421	1388	1934	1296	892	1424	1140	1225	1061	937	1673	1131	1323	1469	870
AFUA_2G02390	7681	6154	7730	511	568	352	142	95	180	5081	5499	4634	953	751	343	187	176	111	13719	17580	16799	720	377	466	159	80	108	12057	9926	7687	246	581	263	151	133	32
AFUA_2G02400	1604	1644	1747	487	479	536	667	595	1285	799	762	750	679	706	573	684	1136	936	1034	921	831	732	449	748	1154	963	913	1170	1055	1160	428	627	572	427	1126	658
AFUA_2G02410	266	274	323	65	87	65	101	74	142	162	113	92	115	74	59	99	65	91	149	211	142	54	55	70	103	113	99	173	163	177	39	76	35	86	97	65
AFUA_2G02420	2149	1919	2465	2559	2757	2183	3179	2553	3315	1392	1371	1374	2179	2245	2497	2288	2937	2564	3007	1412	3007	3153	1956	2583	3114	2031	2454	1970	1827	1610	1843	2131	2090	1752	2737	1515
AFUA_2G02430	1672	1163	1618	1016	957	1576	1216	898	919	1160	783	721	1244	1344	1783	904	923	909	1759	1488	1485	1497	1097	1832	822	594	846	1224	1015	1011	1590	1481	1958	1146	1115	462
AFUA_2G02440	24	22	24	1084	937	1162	1663	1315	1743	7	5	4	2318	1709	1023	1332	1528	1516	22	6	23	2351	1457	1384	1835	2024	954	26	31	30	1209	1813	1089	1239	1476	638
AFUA_2G02450	246	171	290	1069	1443	1005	485	446	737	83	94	90	1008	1031	1028	545	618	830	128	107	136	1411	829	1147	519	397	741	177	140	174	919	1227	884	353	873	466
AFUA_2G02460	10	7	3	17	14	13	388	255	107	2	5	1	26	19	13	239	111	57	4	3	5	21	7	9	182	237	2	7	6	3	33	25	5	144	53	18
AFUA_2G02470	5779	5149	7393	13053	14383	10147	9274	9798	11724	3809	4368	4893	5058	6464	10487	8263	10710	11016	5584	4530	5661	7842	5857	10843	7772	6656	12863	7775	8118	7931	6349	6655	8013	5401	11433	11281
AFUA_2G02480	12361	11111	14293	1417	1677	726	666	958	2319	9519	10996	11229	1087	1136	913	853	2220	2225	8342	10410	7548	1174	816	1085	1470	1031	2853	16437	19459	18075	1138	1799	743	1084	2654	1971
AFUA_2G02485	42	19	43	41	45	25	46	33	35	8	26	17	27	20	33	53	61	21	50	23	16	8	18	16	64	32	31	33	50	92	38	37	21	62	116	26
AFUA_2G02490	540	359	541	424	558	285	98	140	172	241	242	178	649	629	269	171	171	148	432	414	482	490	312	304	161	208	171	479	398	568	476	643	364	77	241	111
AFUA_2G02500	178	86	144	940	904	416	863	949	1229	96	65	68	479	598	363	1202	1432	1249	173	114	145	521	356	502	934	445	1319	172	107	217	289	522	368	1275	1450	1120
AFUA_2G02510	915	875	1326	1022	1617	672	702	632	920	429	410	414	735	818	728	713	762	624	1154	632	1112	965	645	785	885	401	1052	1282	1273	1526	677	696	589	703	853	749
AFUA_2G02520	304	202	359	2148	1925	2594	1801	1420	2061	121	131	92	2684	2540	2376	1536	2034	1617	342	117	228	3613	2077	2944	1967	1301	1529	198	240	271	1606	1944	1962	1002	1652	994
AFUA_2G02530	5834	5363	7326	6315	9350	7574	9389	7027	7591	4766	4505	4906	6074	5933	7791	6166	7247	6931	5744	2049	5472	10811	7075	7987	8212	8551	6446	5475	5883	4771	8466	6219	8396	4805	7718	4314
AFUA_2G02540	8267	5722	6302	1514	1798	1391	2081	2000	1818	7839	6530	4235	1190	1479	1371	1885	1647	1516	2622	2424	2157	1401	908	1738	1610	1262	1907	3923	4791	6719	1019	1200	1141	1579	2076	1297
AFUA_2G02550	2937	2322	2878	794	1062	1200	1046	1043	971	1278	1206	1109	1366	1177	1331	1071	950	933	3590	2587	3052	1810	1071	1497	916	617	764	2203	1731	1933	1374	1546	1284	970	1228	545
AFUA_2G02560	1462	1095	1349	3303	3509	4460	2617	2208	2698	678	484	498	4297	3925	4962	2161	2339	2536	1725	895	1504	5957	3591	5391	2446	1650	2185	847	678	797	3333	3843	4722	2156	2773	1762
AFUA_2G02570	1778	1512	2107	417	570	408	421	336	663	833	882	872	424	466	460	429	668	585	1782	1438	1441	505	359	571	633	365	742	1522	1632	1424	309	477	324	259	593	400
AFUA_2G02580	425	281	413	834	1253	1146	457	437	741	138	105	111	1328	1269	1039	423	669	680	482	360	364	1542	871	1597	607	361	639	324	320	396	887	1099	1108	373	707	393
AFUA_2G02590	598	452	729	2567	2272	3943	2551	2239	2550	236	241	223	4969	3899	3831	2598	2447	2259	1060	863	1057	4722	2762	4352	2018	1599	1910	768	566	653	2882	3940	3462	2134	2806	1736
AFUA_2G02600	847	608	960	846	1036	505	529	414	687	297	298	279	704	775	562	429	566	482	1185	1003	892	669	396	688	448	280	288	622	530	747	385	602	422	377	421	204
AFUA_2G02610	20062	17615	27863	9486	11971	8410	11691	11049	18712	17733	22693	24811	10389	13166	11593	15222	21782	21535	4308	3771	3881	1643	1256	1548	1795	1223	2587	4682	5005	5163	1220	1352	1065	1211	2567	1663
AFUA_2G02620	0	0	0	0	0	0	0	0	0	0	1	0	0	0	0	0	0	0	0	0	0	0	0	0	0	0	0	0	0	1	0	0	0	0	0	0
AFUA_2G02630	10587	7993	10811	19684	28498	26786	5929	4899	13421	8955	7782	6333	25618	29575	29304	7735	16272	15061	1358	1439	1131	2315	1756	2293	1849	2533	2430	1647	2037	1809	2338	1773	2094	2343	1904	1405
AFUA_2G02640	763	585	745	1394	2058	948	333	330	972	720	586	354	634	1047	1239	525	1174	925	47	59	41	94	54	199	219	297	242	61	76	162	50	44	78	52	294	92
AFUA_2G02650	490	360	407	178	247	195	271	263	275	253	167	205	276	249	227	263	295	202	279	151	221	334	225	321	285	304	210	244	286	307	197	263	211	314	331	139
AFUA_2G02660	294	276	301	126	154	223	207	158	220	140	107	89	211	124	228	142	249	198	210	75	150	334	136	234	191	181	111	210	198	224	146	146	233	110	205	87
AFUA_2G02670	4550	3839	5310	1147	1036	1088	1393	1196	1710	2370	2495	2514	1480	1474	1218	1427	1465	1427	3370	3075	3381	1771	968	1527	1450	832	1105	4741	4705	4546	959	1419	1119	1353	1609	719
AFUA_2G02680	2581	2322	3499	2655	2375	3728	3175	2479	3655	1626	1582	1518	3181	3059	3818	2202	2981	3257	3522	1883	2895	5565	3739	4754	3319	2981	3367	2624	2469	2378	3628	3664	4077	2378	3569	2427
AFUA_2G02690	6819	5309	6211	3846	5069	2135	7530	4448	5964	5484	5057	3758	1670	2264	2092	4550	5117	4516	3207	1969	3083	2101	1730	2140	5839	12863	8240	3715	4582	4582	1790	1871	1553	4065	8315	4851
AFUA_2G02700	2302	2628	3412	1905	2331	1267	1709	1245	2106	905	971	1149	1335	1554	1255	1151	1686	1698	3087	2110	2536	1364	1053	1578	1499	2019	2098	2136	1752	1812	934	1345	1108	1423	2189	1287
AFUA_2G02710	2804	3490	4771	1660	1943	1473	1864	1349	2432	1053	1252	1503	1513	1608	1484	1442	1945	1738	3268	3288	2955	1824	1166	2071	2391	2642	1740	2318	1949	1933	708	1305	1279	1571	2767	1095
AFUA_2G02720	32	23	53	747	1575	563	970	940	1250	9	18	16	487	573	551	672	1037	1018	121	46	156	800	435	613	1387	3297	1480	76	37	70	377	479	423	648	2072	1062
AFUA_2G02730	2208	2237	2644	2095	3910	1991	1592	1355	1573	1833	1591	1251	1775	1997	2530	1151	1247	1189	1472	715	1318	2799	2148	2567	1345	1383	2015	1645	1858	2208	2781	2457	2755	1264	1681	1108
AFUA_2G02740	6096	5127	5127	407	854	503	532	539	374	6265	4839	3029	459	482	572	368	440	206	1702	1326	1182	719	793	774	588	348	853	2067	2707	2830	761	724	660	824	644	202
AFUA_2G02750	2671	1862	2351	950	1181	1252	1306	1251	1649	2545	2505	2292	1348	1100	1286	1797	1896	1162	1413	1409	1150	1472	1143	1782	1910	1771	1400	1754	1748	2006	840	1491	1147	1125	2423	953
AFUA_2G02760	138	122	126	7522	7730	3192	3869	5136	8048	96	60	71	2525	2971	4406	4637	6188	5583	245	83	192	2438	1416	3056	6907	5758	7358	164	133	137	1148	1468	1347	843	6246	3992
AFUA_2G02770	287	212	262	1224	1962	1037	931	774	692	228	193	150	1604	1435	1209	701	688	583	93	47	63	1554	805	1240	784	559	593	105	127	127	826	1066	879	688	742	441
AFUA_2G02780	2195	1899	2519	1361	1493	2994	2970	2357	2661	1232	1136	1166	3379	2556	2911	2440	2479	2310	2829	1185	2262	4033	2121	3492	3313	2166	1721	1828	1617	1694	1980	2651	2419	2412	2613	1454
AFUA_2G02810	417	232	321	700	746	1009	434	477	422	180	111	95	1179	1016	989	567	646	476	165	197	201	1314	620	1272	368	298	429	197	251	251	599	877	812	301	557	276
AFUA_2G02820	1540	1268	1404	4102	4042	2362	4410	4114	5475	1035	1012	1043	1733	2039	2521	4213	6190	5055	1772	2076	1614	2100	1586	2505	3680	2664	5453	1281	1246	1152	2270	2500	2081	2968	5183	4607
AFUA_2G02830	962	874	1293	1078	1011	902	2362	1918	1627	806	820	915	969	930	946	1861	1829	1383	1403	1206	1141	1479	1063	1126	1666	1396	1214	1057	1031	719	1323	1643	1043	2067	1791	1109
AFUA_2G02840	6093	4144	5096	1114	1267	1382	3294	2350	1911	6081	5243	4146	1337	1369	1426	2163	2117	1547	3086	2497	2781	1944	1339	1449	2010	1946	1280	3747	4913	4633	1818	1869	1496	2290	2136	741
AFUA_2G02850	5371	5476	7949	1264	1789	1465	2564	2037	1865	4204	5187	5245	1780	1426	1553	2004	1762	1486	2423	1877	2055	2480	1405	1642	2369	1649	1300	4933	7531	8248	1470	1585	1470	1544	1976	714
AFUA_2G02860	1683	1698	2187	2452	2503	2681	9571	6035	4292	1871	1748	1858	3285	2876	3032	5816	4348	3548	1819	1358	1837	5139	3337	3573	5850	4368	3643	1724	1698	1212	3348	3520	2731	5359	3986	2197
AFUA_2G02870	660	594	795	866	1047	385	361	374	1166	221	198	174	364	455	476	547	899	808	677	599	633	352	172	588	925	1181	913	276	246	331	166	251	301	168	1037	566
AFUA_2G02880	1735	1300	1773	1188	1699	962	808	779	1073	998	967	720	1134	1128	923	769	972	767	1113	819	1204	1284	813	1150	921	475	927	1259	1288	1482	691	886	736	488	912	499
AFUA_2G02890	2231	1531	1905	705	1031	986	1102	1036	967	2018	1834	1318	1215	1069	1036	1116	1084	676	1557	1718	1458	1534	930	1217	1137	978	1019	1583	1789	1586	1263	1405	893	1084	1208	667
AFUA_2G02910	1417	942	1223	554	619	476	573	500	510	552	533	449	505	489	468	542	469	424	1831	1900	1750	737	635	432	473	540	805	1427	1149	1144	999	852	557	683	675	736
AFUA_2G02920	1900	1484	1780	306	366	292	494	432	318	1312	1248	903	551	431	309	478	417	219	1152	1234	1078	417	296	430	398	223	259	1405	1504	1363	429	605	261	489	381	154
AFUA_2G02930	738	511	716	222	254	448	638	434	497	407	283	194	435	337	424	512	567	415	500	263	359	608	264	549	664	408	230	456	533	608	202	354	402	371	445	106
AFUA_2G02950	1834	1242	1319	699	1049	560	506	350	285	1369	1164	795	1008	774	491	396	354	200	1468	1375	1127	1146	740	718	438	289	312	850	922	862	662	922	533	419	382	128
AFUA_2G02960	909	616	908	1032	1152	1045	1431	1129	1176	286	209	242	1322	1210	1164	1300	1116	878	720	566	776	1585	1046	1249	1182	842	889	504	493	619	1110	1440	956	930	1116	656
AFUA_2G02970	68	65	86	437	307	114	433	294	341	18	41	45	349	354	107	204	207	194	24	32	20	247	183	152	229	240	204	19	21	41	191	261	130	183	160	136
AFUA_2G02980	1132	794	869	623	711	886	1218	955	752	737	786	655	1313	1073	943	941	757	528	1363	1267	1387	1310	816	981	914	706	432	707	660	614	1096	1284	859	1306	710	375
AFUA_2G02990	257	171	180	2031	2527	1769	7106	5373	4600	239	141	98	2582	2528	1795	4941	3787	3317	174	138	128	3304	2502	2674	5021	4406	4586	115	146	120	2996	3261	1554	6959	4754	2986
AFUA_2G03000	399	276	352	723	666	689	510	328	512	283	206	129	688	637	692	323	362	389	251	189	273	823	421	720	583	616	470	141	144	189	407	655	692	301	523	280
AFUA_2G03010	2498	1850	2132	7854	15323	5735	2007	1658	3249	2150	1454	1310	6531	6683	6559	1829	2475	3155	1126	1071	1054	6519	4937	6740	1856	1372	3541	716	797	804	7267	7140	7835	2172	3955	2664
AFUA_2G03020	1253	1415	1175	114	124	86	91	61	37	1380	1519	1260	46	64	88	26	41	28	562	546	470	68	44	106	62	26	114	449	567	766	97	72	139	119	34	59
AFUA_2G03030	14259	12492	14601	2932	3970	2983	2629	2054	2793	13415	12581	10827	3542	3050	3174	1961	2641	2270	10747	5723	10060	5519	3577	3963	3081	2684	2624	9992	10557	9881	2797	3324	3050	2010	2861	1816
AFUA_2G03040	5260	4950	5469	8987	7880	14850	4816	4693	6825	4754	3622	3990	19722	16011	13252	4408	5971	6975	7209	6506	5541	22675	12525	17303	5531	5036	3420	3388	2941	2258	9454	18136	16822	5986	8873	2254
AFUA_2G03050	62	24	23	106	148	107	156	90	91	19	25	24	134	118	96	87	87	62	30	27	26	99	71	83	127	93	78	21	23	43	75	64	82	139	100	50
AFUA_2G03060	1187	827	1342	1302	2914	872	1159	753	1000	612	544	459	772	1032	1121	621	844	846	1844	729	1560	1079	1099	1244	832	1167	1574	1108	989	1179	965	759	1274	561	1252	980
AFUA_2G03070	1191	961	1391	1336	1409	1275	3189	2420	1900	522	598	727	1315	1223	1320	2517	1890	1495	1336	1679	1264	1657	1059	1462	1989	2051	1729	1651	1576	1882	1381	1797	1151	1826	2596	1434
AFUA_2G03080	5872	4506	6700	2064	1828	1256	2686	4337	4278	3834	4403	3939	1075	1153	1834	4248	3826	3503	6801	4838	7142	2275	1805	1695	4720	3059	3179	9743	10550	8766	1475	1572	1113	1603	3648	1740
AFUA_2G03090	18892	17901	24996	5554	5795	3710	5083	6033	8953	16711	18570	20003	4084	4513	4111	5190	6887	6635	10704	9188	11999	7212	5426	4539	8645	9251	7529	21819	26136	20600	4864	5966	3338	4077	6726	4285
AFUA_2G03100	1079	880	1192	974	1037	533	433	414	667	552	405	417	726	900	577	385	577	535	675	674	533	798	598	829	451	397	796	594	661	914	616	861	650	348	677	523
AFUA_2G03110	1214	1036	1376	1892	2087	3047	4606	4048	3773	590	731	613	2876	2916	2726	3803	3819	3093	1155	1003	1096	4034	2946	3575	4175	2557	2736	1119	1089	1029	3379	4118	2436	3286	3158	1888
AFUA_2G03120	3576	3066	4826	5182	6775	5787	7585	6239	8277	1857	1724	1429	3971	3970	5879	6422	7440	6723	4835	2925	4462	4729	3028	5661	7429	6874	6814	4227	3215	3070	5063	4358	6514	4831	7286	5229
AFUA_2G03130	32	16	21	62	98	33	32	30	74	10	5	2	43	51	32	71	71	128	77	34	61	64	40	29	71	31	141	19	27	24	40	47	26	8	98	70
AFUA_2G03140	1393	1261	1676	660	877	1082	1151	946	1591	640	555	488	1107	1205	961	969	1386	1557	1638	1347	1269	1477	956	1320	1555	1404	1118	994	1045	899	1040	1240	1118	1030	1626	911
AFUA_2G03150	1306	933	1032	848	1317	1105	634	498	510	728	542	461	1138	910	1030	433	481	497	498	330	463	1514	756	1378	493	366	486	622	708	843	733	866	1046	452	808	242
AFUA_2G03155	1162	872	1012	331	448	378	606	487	424	660	598	587	467	444	350	532	503	392	1091	1049	915	577	294	588	467	341	367	650	675	564	216	413	375	461	522	160
AFUA_2G03160	323	272	336	330	373	248	366	304	380	141	108	107	293	287	188	327	355	318	536	309	502	268	173	291	366	232	291	204	211	187	154	241	214	140	274	249
AFUA_2G03170	2000	1539	2128	652	796	581	880	796	737	1089	1145	1105	625	628	549	578	719	707	1720	682	1468	836	576	505	705	534	795	1768	1882	1924	698	575	549	546	746	556
AFUA_2G03180	782	676	839	90	119	63	194	146	87	760	774	519	94	57	95	134	143	59	328	190	359	113	88	127	137	99	67	539	779	931	78	102	88	81	160	69
AFUA_2G03190	136	116	70	2776	3583	3735	1464	1672	3263	184	160	96	3831	3722	4020	1203	2344	3335	79	64	42	5742	3488	5835	1454	1865	1070	44	48	48	3478	7237	4880	2194	4914	833
AFUA_2G03200	255	219	363	610	786	630	365	387	544	206	210	171	594	524	721	386	514	360	309	162	249	593	349	753	564	501	468	362	332	336	374	470	515	221	534	263
AFUA_2G03210	954	656	858	815	1055	851	730	657	797	448	420	447	946	849	893	741	754	506	1134	902	1116	955	650	1081	766	661	849	731	772	689	657	930	739	449	983	399
AFUA_2G03220	1818	1819	2671	2378	2800	4255	4193	3248	5008	1011	1185	1566	3557	3812	4452	3443	4337	4888	4210	3238	3936	5315	3696	4835	4060	3640	4804	2336	1905	1715	4332	4742	4500	3285	5747	4192
AFUA_2G03230	116	102	86	867	818	865	1150	940	585	80	100	60	1770	1706	959	1175	721	507	102	66	76	1525	986	844	542	372	348	50	60	60	1122	1782	621	751	791	184
AFUA_2G03240	471	294	327	43	24	18	48	28	16	310	259	98	53	51	51	49	32	20	160	111	93	49	32	38	26	24	23	62	78	132	24	44	31	45	47	20
AFUA_2G03250	152	74	80	17	14	14	28	7	21	86	74	45	8	3	8	11	7	3	46	31	51	12	21	12	6	16	11	18	25	28	11	21	10	24	23	6
AFUA_2G03260	2129	1555	2285	933	1382	1230	1257	982	1031	1050	1134	906	1210	1072	1160	985	1011	791	2437	1934	2229	1609	1013	1578	1146	841	945	1949	1946	1955	1062	1375	1073	756	1019	444
AFUA_2G03270	188	147	152	264	306	599	3228	2687	1379	110	84	70	868	646	580	2342	1777	1246	280	209	212	2032	1565	795	2070	1247	815	141	138	75	2113	2286	424	2674	1202	684
AFUA_2G03280	715	662	924	799	1165	1031	1912	1450	1932	348	284	304	744	773	1236	1326	1737	1483	949	294	785	1149	788	1193	1860	1878	1651	814	782	710	712	696	755	868	1899	900
AFUA_2G03290	4190	3356	5233	6862	8120	11424	9904	9288	11590	2759	2906	2450	10677	10297	11380	9209	10754	11835	3641	2781	3160	13762	8374	12369	8158	8672	9934	4541	4740	4860	9138	11239	9600	6799	12894	10733
AFUA_2G03300	3192	2271	3517	9313	12894	10292	4705	5977	14244	1887	1874	1617	11836	13796	10687	4833	11850	15842	6754	5291	6392	15995	13538	12338	7934	6453	19696	5586	5015	3744	20821	22541	12950	7661	18482	19781
AFUA_2G03310	2148	1846	2767	1890	1770	2502	1549	1351	1813	834	870	806	2927	2772	2784	1335	1586	1754	1936	1987	1758	4039	2317	3356	1667	1512	1476	2118	2039	3125	2089	2812	2622	1521	2245	1234
AFUA_2G03320	2441	2026	2461	2454	2781	1994	1617	1767	2574	1397	1252	1104	2593	2591	2336	1706	2520	2292	1629	1025	1362	2809	1698	2715	2173	1193	2680	1113	1122	1323	1608	2413	1779	1347	2423	1571
AFUA_2G03330	375	246	354	427	544	680	627	569	575	136	164	108	784	694	712	642	531	440	338	294	297	1028	576	991	609	316	366	172	149	142	597	852	624	719	712	272
AFUA_2G03340	2091	1992	2464	980	1253	655	769	688	1638	1424	1259	928	678	665	722	730	1230	1364	1521	1029	1311	724	417	804	1369	1174	1521	1136	1016	1202	362	525	530	422	1558	1069
AFUA_2G03350	451	329	407	1247	1562	859	1520	1189	1097	287	236	171	976	852	1016	1170	991	929	645	285	550	992	408	730	1253	747	857	380	334	375	555	784	648	685	915	540
AFUA_2G03360	3795	3117	3382	2041	2575	2045	3088	2457	1831	3237	2991	2176	2566	2393	2482	2344	1786	1355	1712	1052	1619	2895	1784	2647	2455	1182	1537	1955	2437	2394	2015	2038	2306	2288	1943	795
AFUA_2G03370	110	81	175	257	342	617	512	317	484	50	46	78	511	421	525	404	461	440	362	213	347	589	268	661	442	279	299	251	153	161	210	411	566	313	399	254
AFUA_2G03380	3582	2597	2943	8672	7402	10335	3241	3209	4349	3188	2132	1872	14415	12169	10594	3071	4413	4744	2983	2552	2411	15153	8030	15293	3654	3669	2996	1530	1398	1436	6891	13815	12332	4213	6167	2209
AFUA_2G03390	2344	2016	2433	2322	2495	3624	3163	2614	3284	1837	1744	1422	3252	3059	3919	2611	3111	3012	3319	2305	3120	4548	2465	4441	2936	2535	2018	2090	1873	1584	2320	3124	3272	2183	3341	1291
AFUA_2G03400	2017	1604	1924	1742	2084	3479	2178	1832	1850	1032	827	647	3714	3011	3537	1831	1606	1671	2128	1828	1938	4836	2950	4401	1644	1712	1165	1227	1159	1489	2699	3740	3621	2157	1948	1281
AFUA_2G03410	2331	1718	1830	546	800	505	726	551	477	1969	1869	1427	609	512	586	476	518	342	1109	1342	1044	772	407	788	606	595	540	847	948	1147	362	618	472	662	820	218
AFUA_2G03420	2263	2182	2772	2146	2144	2143	1990	1591	2550	1397	1161	980	2334	2546	2568	1600	2052	1904	2387	1657	2111	3137	1711	3021	2324	1841	2306	1276	1152	1272	1585	2149	2372	1428	2621	1127
AFUA_2G03430	448	363	484	254	320	179	369	264	226	165	103	80	217	208	177	259	202	166	318	291	313	264	176	271	283	263	196	222	218	311	198	191	172	307	247	123
AFUA_2G03440	479	288	347	708	847	646	1482	1119	900	154	87	60	638	586	681	1199	790	696	373	158	296	887	601	701	1198	799	943	295	300	331	579	643	495	1198	983	479
AFUA_2G03450	1738	1205	1307	1608	2190	1343	1782	1428	1721	1400	1238	912	1383	1465	1286	1282	1488	1250	818	677	850	1654	1282	1344	1407	1137	1845	876	988	1199	2323	1932	1616	1290	1624	1848
AFUA_2G03460	3250	2254	3506	1245	1458	1763	3157	2268	2351	1624	1487	1463	1896	1841	1847	2618	2276	1785	4139	1975	3863	2352	1369	1918	3358	1817	1318	3322	2453	3161	1530	1576	1690	1975	2105	698
AFUA_2G03470	8291	6045	6370	441	736	338	1199	853	590	9152	8929	7286	334	371	350	836	645	374	1798	2395	1659	443	367	612	888	615	725	3546	4192	6114	465	647	390	1043	773	457
AFUA_2G03480	1454	1388	2262	1782	2393	3325	1475	2062	1795	1592	2470	2722	1249	1546	4108	1970	2361	1606	1599	1152	1391	1650	825	4039	2321	899	1973	2968	4017	3644	630	1097	1771	579	1923	1252
AFUA_2G03490	14179	12082	18161	9550	11115	12619	5345	10079	16447	9045	9392	11591	8288	8909	16470	8997	16432	16947	7792	6855	7910	12829	8583	15945	11933	5180	22030	17053	20623	19706	7720	12107	10492	5119	17817	14382
AFUA_2G03500	16798	9623	14468	215	391	486	1050	526	353	12281	12410	8449	491	387	553	672	488	190	10580	8990	12129	940	709	591	673	1034	362	13767	14508	19296	872	701	480	716	752	267
AFUA_2G03510	671	357	456	325	378	295	186	186	128	352	282	207	542	492	349	224	154	111	189	185	215	493	259	373	211	104	194	329	342	466	388	517	343	215	185	91
AFUA_2G03512	8	1	0	0	0	0	0	0	0	0	1	1	0	1	0	0	0	0	1	2	0	2	1	3	0	1	6	1	2	0	2	1	1	0	2	1
AFUA_2G03514	0	3	0	0	0	0	0	0	0	0	0	0	2	0	0	0	0	0	0	1	1	1	0	0	0	1	0	1	0	0	0	0	0	0	0	0
AFUA_2G03516	0	0	0	0	0	0	0	2	0	0	0	0	0	0	0	0	0	0	0	0	0	0	0	0	0	0	0	0	2	0	0	0	3	0	0	0
AFUA_2G03518	0	0	0	0	2	0	0	0	0	0	0	0	2	0	0	0	0	0	0	0	0	0	0	1	1	0	0	0	0	0	1	0	0	0	0	0
AFUA_2G03520	310	206	281	140	236	136	320	306	420	162	85	78	108	100	196	390	479	291	136	80	149	200	79	142	549	507	354	172	197	163	89	83	123	289	433	155
AFUA_2G03540	137	162	133	195	231	152	569	504	505	74	88	52	257	220	224	582	523	334	87	92	108	337	196	246	887	539	399	84	105	112	158	245	163	568	567	214
AFUA_2G03560	2088	1622	2078	2862	3266	4371	8014	5539	4842	1217	1137	1025	4120	3488	4329	4881	5033	3745	1718	536	1499	7275	4238	5230	6190	4980	4103	1670	1864	1482	3543	3506	3508	4446	4638	2649
AFUA_2G03580	772	530	1027	1647	1587	2723	2048	1763	2086	169	140	119	3111	2774	3358	1955	1922	1826	1602	999	1466	4009	2330	3239	1756	1572	1284	847	603	824	2242	2783	2821	1437	2432	852
AFUA_2G03590	4027	4303	5255	11379	9889	15168	4482	4084	6568	3034	3255	3778	19984	17908	12513	4100	5505	6942	6387	6969	5317	20244	13451	19996	4817	4946	4184	3076	2792	2238	12826	19228	15381	5570	8112	4111
AFUA_2G03600	161	133	168	336	325	341	638	487	381	57	44	11	533	409	317	507	352	314	222	119	156	596	467	430	393	451	258	120	103	103	486	604	349	580	399	197
AFUA_2G03610	1922	2527	3959	6627	6242	4870	3404	3238	9595	717	898	1120	7674	6404	5224	3570	6963	8854	3491	2588	3059	7899	3819	7032	8005	8961	8304	1608	1181	1054	2171	5523	4545	2719	9195	4424
AFUA_2G03620	320	410	382	84	116	52	50	45	52	345	391	362	87	88	45	63	59	21	418	558	421	89	48	60	61	73	38	289	339	283	60	52	54	44	34	21
[truncated: 7,860 more rows]

## Sheet: MRN
Gene	CEA17_0h_1	CEA17_0h_2	CEA17_0h_3	CEA17_24h_1	CEA17_24h_2	CEA17_24h_3	CEA17_48h_1	CEA17_48h_2	CEA17_48h_3	dclA_dclB_0h_1	dclA_dclB_0h_2	dclA_dclB_0h_3	dclA_dclB_24h_1	dclA_dclB_24h_2	dclA_dclB_24h_3	dclA_dclB_48h_1	dclA_dclB_48h_2	dclA_dclB_48h_3	ppdA_ppdB_0h_1	ppdA_ppdB_0h_2	ppdA_ppdB_0h_3	ppdA_ppdB_24h_1	ppdA_ppdB_24h_2	ppdA_ppdB_24h_3	ppdA_ppdB_48h_1	ppdA_ppdB_48h_2	ppdA_ppdB_48h_3	rrpA_rrpB_0h_1	rrpA_rrpB_0h_2	rrpA_rrpB_0h_3	rrpA_rrpB_24h_1	rrpA_rrpB_24h_2	rrpA_rrpB_24h_3	rrpA_rrpB_48h_1	rrpA_rrpB_48h_2	rrpA_rrpB_48h_3
AFUA_1G00100	2.63831	0	0	5.48962	5.72776	3.67874	3.98117	2.85968	1.55597	0	0	0	0.812993	4.24042	7.08621	4.49645	3.31278	0.946692	0	2.95271	0	1.35548	2.11714	1.52873	2.39527	0	5.40981	0	0	0	5.90258	2.3283	1.99013	9.55876	1.44693	1.40482
AFUA_1G00110	1.75887	3.42025	0	8.23443	8.18252	2.75905	9.55481	9.53227	3.11195	0	0	0	17.8859	5.93659	7.97199	4.49645	4.14098	3.78677	0	0	0	8.81063	14.82	3.05746	3.1937	4.1397	5.40981	0	0	0	5.90258	21.7308	0.995065	12.745	2.89386	11.2385
AFUA_1G00120	0	0	0	0	0	0	0	0	0	0	0	0	0	0	0	0	0	0	0	0	0	0	0	0	0	0	0	0	0	0	0	0	0	0	0	0
AFUA_1G00130	0	0	0	0	0	0	0	0	0	0	0	0	0	0	0	0	0	0	0	0	0	0	0	0	0	0	0	0	0	0	0	0	0	0	0	0
AFUA_1G00150	7.91493	23.9417	11.271	1195.82	1285.47	1227.78	2025.62	1502.29	1010.61	36.7075	26.2267	18.0153	1327.62	1211.06	1295.01	1563.87	1026.13	923.025	15.0309	4.42907	7.21903	1437.49	1510.58	1289.48	1372.49	1089.78	924.175	12.9785	16.213	9.71338	1086.07	982.544	1210	1588.88	820.408	625.144
AFUA_1G00160	0	0	0	0	0	0	0.796234	0.953227	1.55597	0	0	0	0	0	0	0.89929	0	0.946692	0	0	0	0	0	0	0	0	0	0	0	0	0	0.776101	0	2.12417	0	0
AFUA_1G00170	0	0	0	0	3.27301	0	0.796234	2.85968	0	0	0	0	3.25197	0	0	2.69787	0	0	0	0	1.20317	1.35548	0	0	0	9.31433	0	0	0	0	0	0	0	5.31042	1.44693	0
AFUA_1G00180	0	0	0	0	0	0	0	0	0	0	0	0	0	0	0	0	0	0	0	0	0	0	0	0	0	0	0	0	0	0	0	0	0	0	0	0
AFUA_1G00200	0	0	0	4.57468	0	0	9.55481	5.71936	1.55597	0	0	0	3.25197	2.54425	0.885777	7.19432	5.79737	5.68015	2.14727	0	0	0	3.17571	0	5.58897	4.1397	7.21307	3.89354	2.70216	1.21417	9.83763	2.3283	1.99013	4.24834	10.852	12.6434
AFUA_1G00210	0	1.14008	0	0	0	0	0	0	0	0	0	0	0	0	0	0	0	0	0	0	1.20317	0	0	0	0	0	0	0	0	0	0	0	0	0	0	0
AFUA_1G00220	0	0	0	0	0	0	0	0	0	0	0	0	0	0	0	0	0	0	0	0	0	0	0	0	0	0	0	0	0	0	0	0	0	0	0	0
AFUA_1G00230	0	2.28017	0	0	0	0	0	0	0	0	0	0	0	0	0	0	0	0	0	0	0	0	0	0	0	0	0	0	1.35108	0	0	0	0	0	0	0
AFUA_1G00250	0	0	0	0	0	0	0	0	0	0	0	0	0	0	0	0	0	0	0	0	0	0	0	0	0	0	0	0	0	0	0	0	0	0	0	0
AFUA_1G00270	0	0	0	0	0	0	0	0	0	0	0	0	0	0	0	0	0	0	0	0	0	0	0	0	0	0	0	0	0	0	0	0	0	0	0	0
AFUA_1G00280	0	0	0	0	0	0	0	0	0	0	0	0	0	0	0	0	0	0	1.07364	0	0	0	0	0	0	0	0	0	0	0	0	0	0	0	0	0
AFUA_1G00310	0	0	0	0	0	0	0	0	0	0	0	0	0	0	0	0	0	0	0	0	0	0	0	0	0	0	0	0	0	0	0	0	0	0	0	0
AFUA_1G00320	0	0	0	0	0	0	0	0	0	0	0	0	0	0	0	0	0	0	0	0	0	0	0	0	0	0	0	0	0	0	0	0	0	0	0	0
AFUA_1G00330	0	0	0	0	0	0	0	0	0	0	0	0	0	0	0	0	0	0	0	0	0	0	0	0	0	0	0	0	0	0	0	0	0	0	0	0
AFUA_1G00340	0	0	0	0	0	0	0	0	0	0	0	0	0	0	0	0	0	0	0	0	0	0	0	0	0	0	0	0	0	0	0	0	0	0	0	0
AFUA_1G00350	8.79436	5.70041	6.93602	0.914936	0	0.919685	3.98117	2.85968	0.777987	1.59598	3.4969	12.0102	0	1.69617	0	3.59716	0.828196	0	2.14727	1.47636	3.60952	3.3887	0	0	2.39527	5.17463	0	1.29785	9.45757	2.42834	0.983763	0.776101	0.995065	1.06208	0.723464	0
AFUA_1G00400	0	0	0	0	0	0	0	0	0	0	0	0	0	0	0	0	0	0	0	0	0	0	0	0	0	0	0	0	0	0	0	0	0	0	0	0
AFUA_1G00420	11.4327	15.9612	19.074	58.5559	56.4594	33.1086	3.18494	13.3452	36.5654	27.1316	12.2391	8.0068	51.2186	50.885	17.7155	9.89219	38.097	25.5607	20.3991	13.2872	18.0476	40.6645	50.8113	31.339	36.7275	4.1397	51.3932	10.3828	14.8619	15.7842	54.107	65.9686	35.8223	35.0488	20.9805	39.3349
AFUA_1G00440	578.669	538.119	368.476	7.31949	13.9103	12.8756	143.322	110.574	62.239	842.676	809.532	760.646	34.9587	36.4676	15.0582	105.217	81.1632	55.8548	695.717	448.812	662.948	29.8206	23.2885	15.2873	157.29	163.518	41.4752	451.651	510.709	356.967	25.5779	13.1937	14.926	146.568	60.0475	21.0723
AFUA_1G00450	627.038	806.038	866.135	64.0455	67.0966	15.6346	571.696	642.475	536.033	743.725	949.408	1323.12	41.4627	41.5561	22.1444	758.101	544.125	511.214	2371.66	1811.49	2508.61	39.309	31.7571	15.2873	868.686	666.492	300.244	1493.82	1395.67	994.407	38.3668	41.9095	13.9309	472.628	280.704	210.723
AFUA_1G00470	34.298	39.9029	55.4881	46.6617	29.4571	53.3417	70.8649	76.2582	79.3547	68.627	69.938	50.0425	39.0237	41.5561	55.8039	74.6411	79.5068	87.0957	52.6082	62.007	72.1903	45.4086	48.6942	53.5055	90.222	103.493	54.9997	50.616	64.8519	61.9228	39.3505	49.6705	54.7286	97.7118	56.4302	42.1445
AFUA_1G00480	2463.3	2557.21	2620.95	101.558	91.6442	23.9118	402.895	450.877	602.94	3503.17	2963.62	3056.6	47.9666	55.9735	44.2888	656.482	526.733	605.883	4040.1	2529	3632.38	54.897	68.807	35.1608	907.011	692.366	330.9	3122.62	3683.05	3274.62	96.4088	46.5661	44.7779	373.854	311.089	227.58
AFUA_1G00490	0	0	0	0	0	0	0	0	0	0	0	0	0	0	0	0	0	0	0	0	0	0	0	0	0	0	0	0	0	0	0	0	0	0	0	0
AFUA_1G00500	166.213	169.872	226.288	1656.03	2189.64	766.097	272.312	579.562	3908.61	220.245	208.066	308.262	1691.84	1699.56	1366.75	546.768	3471.8	8380.12	1657.7	2466.99	2093.52	1377.85	2782.98	1099.16	1205.62	747.217	8603.39	1103.17	775.521	473.527	4570.57	2821.9	1411	549.098	7851.03	10891.6
AFUA_1G00510	6672.28	7319.33	6341.25	1527.03	1998.99	917.845	293.014	588.141	1644.67	7419.7	7957.2	7494.37	725.19	836.211	1192.26	288.672	1489.92	2465.19	4832.44	5614.58	3728.63	691.296	1114.67	923.352	762.496	421.215	4069.08	6498.32	9223.83	8833.1	2345.29	785.415	1483.64	585.209	2733.97	3044.24
AFUA_1G00520	208.426	312.383	259.234	107.962	100.645	34.0283	21.4983	39.0823	97.2484	263.336	318.218	356.303	39.8367	45.7965	61.1186	27.878	112.635	131.59	149.236	391.234	127.536	23.0432	15.8785	45.0975	63.874	39.3272	146.065	195.975	267.514	291.401	60.0096	53.551	46.7681	53.1042	194.612	103.957
AFUA_1G00530	2392.95	2724.8	2387.72	772.206	939.353	511.345	1071.73	1203.93	2289.62	3898.97	4000.45	4459.79	604.054	737.833	447.317	1232.03	1935.49	2599.62	1628.71	1762.77	1703.69	557.781	654.196	469.32	2105.45	2283.05	3098.02	2774.8	3249.35	2496.34	568.615	502.914	511.464	1237.33	2138.56	3054.07
AFUA_1G00550	5.27662	2.28017	11.271	183.902	215.2	155.427	358.306	267.857	175.047	6.38391	0	26.0221	125.201	129.757	167.412	226.621	159.842	170.405	13.9573	10.3345	4.81269	108.439	166.195	178.097	207.59	298.059	171.311	5.19139	18.9151	6.07086	135.759	126.505	168.166	336.681	234.402	162.959
AFUA_1G00560	17.5887	7.98058	7.80302	412.636	414.035	572.964	1759.68	1667.19	1342.81	25.5356	13.9876	8.0068	928.439	753.947	525.266	1773.4	1344.99	1208.93	12.8836	10.3345	9.62538	516.439	518.699	398.234	1077.87	949.027	973.765	12.9785	16.213	13.3559	922.77	617.777	526.389	1375.4	1155.37	1262.93
AFUA_1G00580	18.4682	9.12066	26.0101	23.7883	22.911	40.4661	55.7364	41.942	82.4666	11.1718	13.9876	34.0289	26.0158	24.5944	35.4311	68.346	77.8504	90.8824	34.3564	17.7163	36.0952	33.887	27.5228	30.5746	139.724	114.877	45.0817	24.6591	17.5641	13.3559	47.2206	29.4919	31.8421	31.8625	76.6872	61.812
AFUA_1G00610	354.413	377.367	347.668	103.388	135.83	52.422	93.9557	67.6791	78.5767	391.014	409.137	368.313	69.9174	89.0488	59.347	70.1446	71.2249	43.5478	153.53	218.501	157.616	58.9635	70.9242	69.5572	102.198	85.8989	91.9667	299.803	353.983	388.535	86.5712	79.9384	45.773	82.8426	82.4749	26.6915
AFUA_1G00630	0	0	0	0	0	0	0	0	0	0	0	0	0	0	0	0	0	0	0	0	0	0	0	0	0	0	0	0	0	0	0	0	0	0	0	0
AFUA_1G00640	0	0	0	0	0	0	0	0	0	0	0	0	0	0	0	0	0	0	0	0	0	0	0	0	0	0	0	0	0	0	0	0	0	0	0	0
AFUA_1G00650	0	0	0	0	0	0	0	0	0	0	0	0	0	0	0	0	0	0	0	0	0	0	0	0	0	0	0	0	0	0	0	0	0	0	0	0
AFUA_1G00660	0	0	0	0	0	0	0	0	0	0	0	0	0	0	0	0	0	0	0	0	0	0	0	0	0	0	0	0	0	0	0	0	0	0	0	0
AFUA_1G00670	0	0	0	0	0	0	0	0	0	0	0	0	0	0	0	0	0	0	0	0	0	0	0	0	0	0	0	0	0	0	0	0	0	0	0	0
AFUA_1G00690	0	0	0	0	0	0	0	0	0	0	0	0	0	0	0	0	0	0	0	0	0	0	0	0	0	0	0	0	0	0	0	0	0	0	0	0
AFUA_1G00700	0	0	0	0	0	0	0	0	0	0	0	0	0	0	0	0	0	0	0	0	0	0	0	0	0	0	0	0	0	0	0	0	0	0	0	0
AFUA_1G00710	0	0	0	0	0	0	0	0	0	0	0	0	0	0	0	0	0	0	0	0	0	0	0	0	0	0	0	0	0	0	0	0	0	0	0	0
AFUA_1G00720	0	0	0	0	0	0	0	0	0	0	0	0	0	0	0	0	0	0	0	0	0	0	0	0	0	0	0	0	0	0	0	0	0	0	0	0
AFUA_1G00730	0	0	0	0	0	0	0	0	0	0	0	0	0	0	0	0	0	0	0	0	0	0	0	0	0	0	0	0	0	0	0	0	0	0	0	0
AFUA_1G00740	0	0	0	0	0	0	0	0	0	0	0	0	0	0	0	0	0	0	0	0	0	0	0	0	0	0	0	0	0	0	0	0	0	0	0	0
AFUA_1G00750	35.1774	20.5215	27.7441	240.628	211.927	180.258	186.319	233.541	239.62	17.5557	34.969	14.0119	135.77	123.82	204.614	223.024	223.613	195.019	13.9573	22.1453	20.4539	155.203	128.087	187.269	204.397	163.518	153.278	25.9569	24.3195	13.3559	107.23	101.669	128.363	145.506	180.866	248.653
AFUA_1G00760	146.866	121.989	86.7002	143.645	142.376	59.7795	164.821	160.142	133.814	191.517	188.833	134.114	139.835	172.161	74.4052	152.879	120.917	113.603	49.3873	73.8178	37.2983	159.947	143.965	109.304	150.902	114.877	100.983	44.1268	64.8519	64.3511	174.126	174.623	58.7088	194.362	125.883	71.6457
AFUA_1G00770	0	0	0	0.914936	0	0	0	0	0	0	0	0	0	0	0.885777	0	0	0	0	0	1.20317	0	3.17571	0	0	0	0	0	0	0	0	1.5522	0	0	0.723464	0
AFUA_1G00780	0	0	0	0	0	0	0	0	0	0	0	0	0	0	0	0	0	0	0	0	0	0	0	0	0	0	0	0	0	0	0	0	0	0	0	0
AFUA_1G00790	0	0	0	0	0	0	0	0	0.777987	0	0	0	0	0	0	0	0	0	0	0	0	0	0	0	0	0	0	0	0	0	0	0	0	0	0	0
AFUA_1G00800	0	0	0	0	0	0	0	0	0	0	0	0	0	0	0	0	0	0	0	0	0	0	0	0	0	0	0	0	0	0	0	0	0	0	0	0
AFUA_1G00810	0	0	0	0	0	0	0	0	0	0	0	0	0	0	0	0	0	0	0	0	0	0	0	0	0	0	0	0	0	0	0	0	0	0	0	0
AFUA_1G00820	0	0	0	0	0	0	0	0	0	0	0	0	0	0	0	0	0	0	0	0	0	0	0	0	0	0	0	0	0	0	0	0	0	0	0	0
AFUA_1G00830	0	0	0	0	0	0	0	0	0	0	0	0	0	0	0	0	0	0	0	0	0	0	0	0	0	0	0	0	0	0	0	0	0	0	0	0
AFUA_1G00840	0	0	0	0	0	0	0	0	0	0	0	0	0	0	0	0	0	0	0	0	0	0	0	0	0	0	0	0	0	0	0	0	0	0	0	0
AFUA_1G00850	0	0	0	0	0	0	0	0	0	0	0	0	0	0	0	0	0	0	0	0	0	0	0	0	0	0	0	0	0	0	0	0	0	0	0	0
AFUA_1G00890	0	0	0	0	0	0	0	0	0	0	0	0	0	0	0	0	0	0	0	0	0	0	0	0	0	0	0	0	0	0	0	0	0	0	0	0
AFUA_1G00910	0	0	0	0	0	0	0	0	0	0	0	0	0	0	0	0	0	0	0	0	0	0	0	0	0	0	0	1.29785	0	0	0	0	0	0	0	0
AFUA_1G00920	1.75887	2.28017	3.46801	0.914936	0	0	0.796234	0.953227	0.777987	4.78793	6.9938	0	0.812993	0	0	0.89929	0	0	2.14727	1.47636	2.40634	0	0	0	0.798425	1.03493	0	9.08493	1.35108	4.85669	3.93505	0.776101	0	1.06208	0	0
AFUA_1G00930	0	0	1.734	0	0	0	0	0	0	3.19195	1.74845	0	0	0	0	0	0	0	0	0	0	0	0	0	0	0	0	0	0	0	0	0	0	0	0	0
AFUA_1G00950	0	0	0	0	0	0	0	0	0	0	0	0	0	0	0	0	0	0	0	0	0	0	0	0	0	0	0	0	0	0	0	0	0	0	0	0
AFUA_1G00970	0	0	0	0	0	0	0	0	0	0	0	0	0	0	0	0	0	0	0	0	0	0	0	0	0	0	0	0	0	0	0	0	0	0	0	0
AFUA_1G00980	0.879436	0	1.734	0	0	0	0	0	0	0	0	0	0	0	0	0	0	0	0	0	0	0	0	0	0	0	0	0	0	0	0	0	0	0	0	0
AFUA_1G00990	0	0	0	0	0	0	0	0	0	0	0	0	0	0	0	0	0	0	0	0	0	0	0	0	0	0	0	0	1.35108	0	0	0	0	0	0	0
AFUA_1G01000	0	0	0	0	0	0	0	0	0	0	0	0	0	0	0	0	0	0	0	0	0	0	0	0	0	0	0	0	0	0	0	0	0	0	0	0
AFUA_1G01010	0	0	0	0	0	0	0	1.90645	0	0	0	0	0	0.848084	0	0	0	0	0	0	0	0	0	0	0	0	0	0	2.70216	0	0	0	0	0	0	0
AFUA_1G01020	0	0	0	0	1.6365	0	0	0	0	0	0	0	0	0	0	0	0	0	0	0	0	0	0	0	0	1.03493	0	0	0	0	0.983763	0	0	0	0	0
AFUA_1G01040	0	0	0	0	0	0	0	0	0	0	0	0	0	0	0	0	0	0	0	0	0	0	0	0	0	0	0	0	0	0	0	0	0	0	0	0
AFUA_1G01050	0	0	0	0	0	0	0	0	0	0	0	0	0.812993	0	0	0	0	0	0	0	0	0	0	0.764365	0	0	0	0	0	0	0	0	0	0	0	0
AFUA_1G01070	0	0	0	0	0	0	0	0	0	0	0	0	0	0	0	0	0	0	0	0	0	0	0	0	0	0	0	0	0	0	0	0	0	0	0	0
AFUA_1G01080	0	0	0	0	0	0	0	0	0	0	0	0	0	0	0	0	0	0	0	0	0	0	0	0	0	0	0	0	0	0	0	0	0	0	0	0
AFUA_1G01090	0	0	0	0	0	0	0	0	0	0	0	0	0	0	0	0	0	0	0	0	0	0	0	0	0	0	0	0	0	0	0	0	0	0	0	0
AFUA_1G01100	0	0	0.867002	0.914936	9.00077	8.27716	0.796234	3.81291	0	0	0	0	10.5689	7.63276	1.77155	5.39574	1.65639	3.78677	0	1.47636	0	5.42193	3.17571	7.64365	2.39527	5.17463	4.50817	0	2.70216	2.42834	0	3.88051	10.9457	6.37251	0	0
AFUA_1G01110	0	0	0	3.65974	5.72776	0	0	0	0.777987	0	0	2.0017	0	0	1.77155	0	0	0	0	0	0	0	1.05857	4.58619	0	0	1.80327	0	0	2.42834	0	0.776101	0	3.18625	0	0
AFUA_1G01120	0	1.14008	0	0.914936	7.36427	0.919685	7.16611	7.62582	2.33396	0	0	0	3.25197	0	0	7.19432	1.65639	5.68015	0	0	0	1.35548	2.11714	1.52873	0.798425	10.3493	0	0	0	0	1.96753	0	0.995065	11.6829	9.40503	7.02409
AFUA_1G01130	8.79436	5.70041	15.606	6.40455	9.81902	9.19685	21.4983	19.0645	4.66792	6.38391	1.74845	0	10.5689	8.48084	7.08621	20.6837	4.14098	1.89338	22.5464	20.669	10.8285	18.9767	15.8785	3.82182	20.759	26.9081	6.31144	5.19139	9.45757	4.85669	4.91882	14.7459	6.96546	25.49	2.89386	5.61927
AFUA_1G01140	55.4045	45.6033	42.4831	21.0435	20.4563	47.8236	75.6423	51.4743	21.7836	15.9598	45.4597	22.0187	48.7796	48.3408	46.9462	51.2595	30.6433	33.1342	149.236	115.156	108.285	46.7641	43.4014	41.2757	44.7118	54.8511	9.91798	40.2332	22.9684	55.8519	59.0258	55.1032	57.7138	90.2772	48.4721	49.1686
AFUA_1G01160	575.151	532.419	348.535	30.1929	41.7308	37.7071	137.749	117.247	84.8006	1040.58	863.734	848.721	53.6576	44.9484	31.888	143.886	86.1324	80.4688	339.269	315.94	283.949	43.3754	46.5771	25.9884	163.677	50.7114	115.409	232.315	289.131	189.411	51.1557	52.7749	27.8618	211.355	68.0056	78.6698
AFUA_1G01175	22814.3	25808.1	22949.5	18.2987	11.4555	0	3.98117	7.62582	28.0075	40663.9	43384.3	47386.3	8.94293	8.48084	0	21.583	14.9075	46.3879	20530.1	35962.6	22348.9	26.4319	25.4057	0.764365	2.39527	5.17463	23.4425	24817.4	30166.9	22372.3	12.7889	24.8352	0	7.43459	11.5754	36.5253
AFUA_1G01180	416.853	348.865	355.471	10.0643	4.09126	0.919685	1.59247	1.90645	0.777987	367.075	398.647	282.24	8.12993	11.8732	3.54311	0	2.48459	0.946692	485.284	659.931	500.52	7.45515	6.35142	1.52873	0.798425	1.03493	0	443.864	460.719	477.17	15.7402	4.65661	3.98026	1.06208	0.723464	5.61927
AFUA_1G01190	113.447	106.028	93.6362	27.4481	28.6388	11.0362	2.3887	0	2.33396	161.194	145.121	116.099	12.1949	26.2906	4.42888	0.89929	0.828196	7.57354	134.205	140.254	128.739	8.81063	15.8785	1.52873	0.798425	0	10.8196	168.72	151.321	137.201	32.4642	17.8503	4.97533	0	2.17039	1.40482
AFUA_1G01200	0	0	1.734	0.914936	4.90951	0	0	0	0	1.59598	0	0	1.62599	0	0	0.89929	0	0	0	0	0	1.35548	1.05857	1.52873	0.798425	4.1397	3.60654	1.29785	0	0	0.983763	0.776101	0	4.24834	0	0
AFUA_1G01210	0	0	0	1.82987	4.09126	0	0.796234	0	0.777987	0	0	0	1.62599	2.54425	1.77155	1.79858	0	0	0	0	0	4.74419	5.29285	2.29309	0	1.03493	0	0	0	0	0.983763	1.5522	0	1.06208	0	1.40482
AFUA_1G01220	0	0	0	4.57468	8.18252	8.27716	2.3887	0	2.33396	0	0	0	9.75592	10.177	5.31466	1.79858	1.65639	0.946692	0	0	0	6.09967	7.40999	5.35055	1.59685	1.03493	0	0	0	0	3.93505	10.8654	7.96052	3.18625	0	8.42891
AFUA_1G01230	218.1	153.911	85.8332	51.2364	44.1856	23.9118	66.0875	44.8017	20.2277	180.345	143.373	130.111	39.8367	22.0502	37.2026	35.9716	26.5023	13.2537	31.1355	35.4326	33.6888	31.1761	25.4057	32.1033	17.5653	50.7114	37.8686	62.2966	98.6289	80.1354	42.3018	25.6113	20.8964	59.4767	29.662	36.5253
AFUA_1G01240	294.611	327.204	319.924	160.114	190.653	127.836	309.735	240.213	171.157	233.013	222.053	258.219	216.256	178.098	165.64	217.628	188.001	182.712	244.789	98.9159	204.539	216.199	222.3	134.528	188.428	195.601	157.786	327.057	391.814	274.403	234.136	198.682	128.363	202.858	188.101	213.532
AFUA_1G01250	241.845	188.114	201.144	69.5351	60.5506	54.2614	227.723	228.775	89.4685	276.104	239.538	138.117	112.193	92.4412	43.4031	191.549	112.635	105.083	140.646	180.115	167.241	98.9502	101.623	50.4481	124.554	139.715	95.5732	185.592	275.621	189.411	124.938	130.385	49.7533	247.466	100.561	82.8843
AFUA_1G01260	29.0214	20.5215	41.6161	15.5539	11.4555	2.75905	23.0908	16.2049	2.33396	6.38391	10.4907	14.0119	10.5689	13.5693	10.6293	11.6908	3.31278	15.1471	3.22091	2.95271	9.62538	2.03322	3.17571	0.764365	17.5653	11.3842	0.901634	19.4677	27.0216	26.7118	8.85387	8.53712	3.98026	36.1109	17.3631	4.21445
AFUA_1G01265	0.879436	1.14008	0.867002	1.82987	15.5468	3.67874	10.351	11.4387	3.88994	1.59598	5.24535	8.0068	21.1378	14.4174	2.65733	6.29503	0.828196	1.89338	2.14727	0	3.60952	10.1661	5.29285	8.40801	5.58897	3.10478	2.7049	0	1.35108	0	4.91882	6.98491	0.995065	2.12417	0.723464	0
AFUA_1G01270	0	1.14008	0	2.74481	3.27301	0.919685	19.1096	21.9242	1.55597	1.59598	5.24535	0	8.12993	6.78467	2.65733	26.9787	4.14098	1.89338	0	0	2.40634	2.03322	2.11714	0.764365	5.58897	6.20956	0	0	0	1.21417	3.93505	3.88051	3.98026	8.49668	7.9581	0
AFUA_1G01280	0	0	0	0.914936	0	0	37.423	31.4565	20.2277	0	0	0	0	0.848084	0	23.3815	18.2203	5.68015	0	0	0	0.677741	2.11714	0	32.7354	19.6636	6.31144	0	0	0	4.91882	0.776101	0	28.6763	21.7039	0
AFUA_1G01300	0	0	0	12.8091	31.9118	8.27716	554.179	542.386	412.333	0	0	4.0034	21.9508	35.6195	7.97199	553.063	385.939	414.651	1.07364	1.47636	3.60952	20.3322	22.23	6.11492	547.719	314.618	112.704	0	5.40432	9.71338	71.8147	57.4315	22.8865	758.329	323.388	108.171
AFUA_1G01310	0	0	0	0.914936	2.45476	0	33.4418	48.6146	21.7836	0	0	0	0	1.69617	0	30.5759	21.5331	9.46692	0	0	0	0.677741	1.05857	0	47.9055	22.7684	0	0	0	0	4.91882	4.65661	0	27.6142	20.257	0
AFUA_1G01320	0	0	0	0	0	1.83937	43.7929	22.8775	7.77987	0	0	0	1.62599	0	0	26.9787	10.7665	8.52023	0	0	1.20317	2.71096	3.17571	0	19.1622	8.27941	0	0	0	3.64252	1.96753	1.5522	0.995065	15.9313	11.5754	0
AFUA_1G01330	55.4045	28.5021	31.2121	31.1078	23.7293	53.3417	180.745	121.06	96.4704	17.5557	20.9814	42.0357	42.2757	31.3791	42.5173	148.383	94.4144	82.3622	6.44182	8.85814	15.6412	31.8538	27.5228	27.5171	126.95	171.798	79.3438	31.1483	31.0749	35.211	48.2044	35.7007	43.7829	217.727	104.179	74.4553
AFUA_1G01340	483.69	437.792	497.659	80.5144	82.6434	94.7275	222.946	185.879	133.036	389.418	342.696	316.269	69.9174	64.4544	124.895	153.779	151.56	155.257	353.227	165.352	366.968	73.196	86.8027	101.66	165.274	145.925	215.491	641.136	718.775	596.159	88.5387	65.1925	77.6151	101.96	164.95	151.72
AFUA_1G01350	2241.68	2509.32	2984.22	1441.02	1688.87	926.122	523.126	1511.82	4362.95	2946.17	3509.14	4053.44	1832.49	2231.31	954.867	1212.24	4049.05	5367.74	2940.69	6151.98	3793.6	1670.63	1618.55	898.128	2610.05	574.384	8405.94	5235.51	6772.97	5261.01	2728.96	3812.21	846.8	1919.19	5408.62	7063.42
AFUA_1G01360	2007.75	2053.29	1833.71	762.142	1080.91	656.655	921.243	1630.97	2042.22	3748.95	3785.39	4261.62	760.962	902.361	746.71	1589.05	2602.19	2601.51	1801.56	3121.02	1832.43	672.997	971.767	794.939	2043.97	1186.03	3139.49	2606.08	2921.04	2665.11	1356.61	1559.19	741.324	2536.26	3142.73	3243.72
AFUA_1G01370	894.387	835.681	737.819	492.236	458.221	274.986	523.126	642.475	631.726	1265.61	1412.75	1261.07	173.168	228.983	255.989	588.136	733.782	585.056	423.013	504.914	374.187	171.468	199.011	234.66	828.765	804.138	874.585	708.624	791.734	829.28	260.697	201.786	341.307	788.067	680.78	869.582
AFUA_1G01380	66.8371	83.226	68.4932	1258.95	914.805	922.444	1641.84	1806.37	2112.24	39.8994	33.2205	66.0561	535.763	721.719	854.775	1665.49	1965.31	2202.01	228.685	252.457	269.511	452.731	363.089	717.738	1834.78	2271.66	1651.79	164.827	110.789	83.7779	372.846	357.007	627.886	713.721	1962.76	1833.29
AFUA_1G01390	175.008	186.974	169.065	377.869	373.941	183.017	432.355	413.701	308.861	189.921	218.556	184.156	106.502	128.909	193.985	375.903	366.063	280.221	249.084	112.203	257.479	147.748	171.488	171.982	391.228	386.027	444.506	184.294	233.737	203.981	185.931	89.2517	156.225	321.812	335.687	238.819
AFUA_1G01400	85.3053	51.3037	85.8332	146.39	121.101	78.1732	148.896	126.779	110.474	76.6069	45.4597	44.0374	46.3406	38.1638	68.2048	109.713	106.837	115.496	82.6701	47.2434	58.9554	51.5083	55.0456	66.4997	168.468	135.575	166.802	96.0407	89.1714	86.2062	59.0258	45.79	45.773	123.202	133.841	59.0023
AFUA_1G01410	558.442	565.481	528.004	1040.28	669.33	230.841	515.96	451.83	598.272	596.895	402.143	396.337	200.809	229.831	255.104	434.357	598.786	397.611	504.609	587.59	507.739	194.512	251.94	151.344	652.313	659.248	548.194	434.779	476.932	613.157	424.002	265.427	284.589	238.969	672.098	376.491
AFUA_1G01420	0	1.14008	0	4.57468	0	0.919685	0.796234	3.81291	4.66792	0	0	0	0	0	0	1.79858	9.93835	0	2.14727	0	0	0.677741	0	0	9.5811	2.06985	6.31144	1.29785	2.70216	3.64252	2.95129	0	0	0	6.51118	0
AFUA_1G01430	1.75887	0	0	41.1721	22.911	24.8315	49.3665	33.363	35.0094	1.59598	5.24535	0	32.5197	39.0119	28.3449	41.3673	19.8767	19.8805	0	0	0	11.5216	32.8157	21.4022	35.9291	63.1305	70.3275	0	4.05324	0	47.2206	33.3724	27.8618	70.0976	55.7067	110.981
AFUA_1G01440	0	5.70041	0	4.57468	4.09126	14.715	19.1096	16.2049	0.777987	0	0	0	2.43898	1.69617	7.97199	16.1872	6.62557	0	0	2.95271	0	4.06645	8.46856	1.52873	8.78267	21.7334	9.01634	0	0	0	12.7889	3.88051	4.97533	28.6763	13.0224	0
AFUA_1G01450	2.63831	4.56033	6.06901	112.537	101.463	81.8519	69.2724	69.5856	68.4629	6.38391	6.9938	2.0017	73.9824	64.4544	68.2048	67.4468	50.52	16.0938	0	0	0	71.1628	105.857	97.0743	75.8504	42.432	171.311	1.29785	0	2.42834	110.182	97.7888	94.5312	146.568	52.8129	94.1228
AFUA_1G01460	14.071	11.4008	14.739	8.23443	13.092	8.27716	39.0155	30.5033	19.4497	30.3236	41.9628	16.0136	12.1949	11.8732	19.4871	19.7844	8.28196	9.46692	35.43	35.4326	36.0952	10.8439	7.40999	12.2298	12.7748	19.6636	12.6229	33.744	22.9684	15.7842	47.2206	17.0742	15.921	21.2417	10.852	21.0723
AFUA_1G01480	215.462	205.215	139.587	7.31949	12.2738	0.919685	0	0	0.777987	290.468	201.072	224.19	3.25197	5.93659	0	0	1.65639	6.62684	115.953	104.821	104.676	9.48837	9.52713	0	0	0	0	114.211	172.938	177.269	11.8052	8.53712	0	0	1.44693	0
AFUA_1G01490	40587.7	55327.1	51389	193.052	157.104	47.8236	70.0686	107.715	406.109	63644.4	94161	102633	147.152	115.339	41.6315	342.629	254.256	685.405	33592	51042.1	36518.7	242.631	206.421	52.7412	75.0519	57.9559	385.899	50604.3	75753.8	56310.9	152.483	141.25	64.6792	70.0976	186.654	304.845
AFUA_1G01500	4349.69	4894.37	3187.1	7.31949	6.54601	0	0	0.953227	3.88994	14121.2	13674.6	10725.1	3.25197	2.54425	1.77155	0	0	1.89338	1608.31	3150.54	1736.18	1.35548	4.23428	3.05746	4.79055	0	7.21307	3018.79	4051.89	3557.53	7.87011	3.88051	4.97533	1.06208	2.89386	0
AFUA_1G01520	6.15605	3.42025	5.20201	6.40455	1.6365	0	3.98117	2.85968	0.777987	0	0	8.0068	4.06497	8.48084	0.885777	6.29503	2.48459	5.68015	5.36819	2.95271	9.62538	2.71096	3.17571	1.52873	4.79055	2.06985	4.50817	2.59569	0	13.3559	5.90258	0	3.98026	0	2.89386	2.80964
AFUA_1G01530	0	1.14008	0	483.086	481.95	765.178	363.083	387.964	251.29	0	0	0	750.393	895.577	666.99	455.041	323.825	286.848	0	0	0	517.794	562.1	610.727	238.729	263.906	331.801	0	0	1.21417	760.449	658.91	722.417	572.464	268.405	849.915
AFUA_1G01540	2.63831	0	0	101.558	40.0943	77.2535	135.36	92.4631	46.6792	0	1.74845	0	152.843	135.693	81.4915	102.519	58.8019	55.8548	0	0	0	139.615	130.204	93.2525	209.187	107.632	120.819	0	2.70216	1.21417	137.727	138.922	53.7335	246.404	49.919	75.8602
AFUA_1G01550	213.703	176.713	113.577	167.433	136.648	54.2614	411.653	384.151	198.387	124.486	171.348	116.099	91.8683	94.9854	81.4915	422.666	352.812	168.511	40.7982	64.9597	43.3142	107.083	175.723	100.132	491.83	203.88	375.08	109.019	101.331	156.628	139.694	136.594	104.482	795.501	280.704	165.769
AFUA_1G01560	292.852	200.655	299.983	1012.83	694.696	707.238	1178.43	1305.92	1176.32	215.457	360.181	244.207	665.842	664.898	744.052	1348.94	1185.15	1115.2	187.887	248.028	277.933	542.193	535.636	590.09	891.841	666.492	1215.4	210.251	247.248	330.255	733.888	617.001	593.059	891.089	883.349	1475.06
AFUA_1G01570	183.802	106.028	107.508	138.155	103.918	153.587	140.933	157.283	105.028	158.002	113.649	126.107	175.607	141.63	144.382	126.8	77.0222	86.149	241.568	157.97	204.539	143.681	160.903	175.804	91.0204	77.6195	68.5242	147.955	75.6605	156.628	195.769	197.13	164.186	144.444	107.073	61.812
AFUA_1G01580	81.7876	61.5645	99.7052	52.1514	21.2745	45.0645	76.4385	82.9308	62.239	87.7787	55.9504	70.0595	69.1044	44.9484	32.7737	80.0368	62.1147	55.8548	83.7437	150.588	90.2379	48.1196	71.9827	32.1033	80.6409	119.016	28.8523	125.891	118.895	185.768	103.295	79.1623	35.8223	120.016	49.1955	42.1445
AFUA_1G01590	633.194	578.022	722.213	450.149	303.571	319.131	626.637	481.38	439.563	414.954	440.609	418.355	432.513	411.321	333.938	514.394	427.349	369.21	830.995	552.157	901.176	437.821	455.185	266.763	763.294	947.992	274.097	847.494	1068.71	1273.67	480.077	418.319	304.49	418.461	347.986	283.773
AFUA_1G01600	16615.2	20160.1	25660.7	5092.53	5426.65	4666.48	836.046	1316.41	1618.21	22032.5	31459.9	42342	6812.89	7212.11	6504.26	1098.93	2118.53	2406.49	16937.7	23511	13327.5	9270.14	10556.1	5840.51	1620	937.643	2485.81	36836.8	48507.9	40264.4	11318.2	12089.3	6612.21	1662.16	2168.22	2035.58
AFUA_1G01610	2674.37	2706.56	3301.54	734.694	654.601	791.849	208.613	301.22	497.912	1773.13	2477.55	2516.14	1110.55	1051.62	1108.11	356.119	544.125	902.197	3647.15	4130.84	3319.55	1028.13	949.537	982.209	331.346	176.972	561.718	4517.8	3973.53	4012.84	834.231	1268.93	1157.26	568.215	796.534	455.161
AFUA_1G01620	38.6952	94.6269	94.5032	255.267	180.015	148.069	40.608	54.334	76.2428	59.0511	54.2019	68.0578	64.2265	97.5297	176.27	53.0581	75.3658	68.1618	118.1	188.974	151.6	73.196	55.0456	151.344	69.463	20.6985	162.294	111.615	112.14	135.987	142.646	81.4906	177.122	73.2838	94.0503	342.776
AFUA_1G01630	29.0214	28.5021	20.8081	689.862	527.772	304.416	674.411	592.907	965.482	20.7477	45.4597	20.017	266.662	307.006	277.248	654.683	775.192	980.773	42.9455	54.6252	26.4698	193.834	285.814	250.712	527.759	393.272	1487.7	27.2548	31.0749	18.2126	424.986	318.202	296.529	620.257	688.014	1581.82
AFUA_1G01640	27.2625	34.2025	27.7441	1049.43	650.51	1784.19	1644.22	1618.58	1628.33	12.7678	15.736	22.0187	1635.74	1422.24	1653.75	1871.42	1681.24	1447.49	78.3755	70.8651	58.9554	1701.81	1465.06	1819.95	1550.54	1224.32	1202.78	48.0203	27.0216	36.4252	1504.17	1630.59	1759.28	1646.23	1263.17	1834.69
AFUA_1G01650	6.15605	0	3.46801	25.6182	12.2738	68.9764	52.5515	69.5856	31.8975	0	5.24535	22.0187	54.4706	44.1004	65.5475	71.9432	46.379	51.1214	5.36819	4.42907	2.40634	64.3854	52.9285	51.2124	63.874	31.0478	34.2621	7.78708	5.40432	10.9276	45.2531	28.7158	35.8223	103.022	43.4078	40.7397
AFUA_1G01660	75.6315	45.6033	45.9511	65.8754	41.7308	131.515	179.949	161.095	94.9144	87.7787	103.159	86.0731	95.9332	89.8969	115.151	166.369	118.432	87.0957	75.1546	79.7232	90.2379	144.359	185.25	192.62	176.452	108.667	80.2455	44.1268	35.1281	66.7795	152.483	110.206	184.087	278.266	101.285	82.8843
AFUA_1G01670	44.8512	33.0624	50.2861	53.9812	74.4609	76.3338	156.858	128.686	119.032	106.93	85.674	66.0561	56.9095	72.9352	79.7199	178.959	108.494	79.5221	61.1973	63.4833	75.7998	77.9402	71.9827	72.6146	154.096	57.9559	138.852	38.9354	44.5857	69.2078	72.7985	55.8793	58.7088	82.8426	59.324	80.0746
AFUA_1G01680	633.194	499.356	651.119	1183.01	1116.1	1420.91	2661.02	2060.88	1768.37	509.117	569.995	694.59	1639.81	1777.58	1406.61	2667.29	1729.27	1471.16	1125.17	1662.38	1072.03	1689.61	1957.3	1587.59	2502.26	1652.78	1599.5	719.007	649.87	876.632	1985.23	1733.81	1696.59	2478.91	1349.98	2518.84
AFUA_1G01690	99.3763	28.5021	82.3652	6965.41	5051.89	3492.04	5861.08	7852.69	14020.9	65.435	41.9628	44.0374	2412.96	3669.66	3391.64	12796.9	14351.8	15370.5	92.3328	91.5341	45.7205	1724.17	2062.09	2308.38	9652.16	9912.52	14792.2	70.0837	56.7454	80.1354	2363	2264.66	1994.11	3619.58	15114.6	22457.4
AFUA_1G01700	62.44	36.4826	56.3551	1075.96	1454.85	543.534	1171.26	1492.75	1721.69	60.6471	47.2081	30.0255	540.641	543.622	616.501	1828.26	2164.9	1962.49	92.3328	82.676	98.6601	510.339	581.155	494.544	1784.48	1208.79	2126.05	72.6794	52.6922	54.6378	520.411	425.304	413.947	1135.37	2742.65	3191.75
AFUA_1G01710	2.63831	0	1.734	10.9792	11.4555	5.51811	11.1473	32.4097	18.6717	1.59598	0	0	4.87796	6.78467	13.2867	25.1801	37.2688	4.73346	1.07364	2.95271	4.81269	8.13289	4.23428	3.82182	25.5496	26.9081	14.4261	1.29785	1.35108	1.21417	2.95129	3.10441	3.98026	11.6829	39.0671	16.8578
AFUA_1G01720	403.661	385.348	397.087	4230.66	3532.39	3052.43	4271	4445.85	4941.77	346.327	353.187	338.287	1952	2326.29	3205.63	4160.12	4586.55	5448.21	501.389	312.988	489.691	2145.73	2817.91	3123.96	3915.48	5003.87	5893.08	310.185	216.173	297.472	1920.31	1766.41	2946.39	4168.68	5716.09	6182.6
AFUA_1G01730	643.747	715.972	657.188	983.556	975.356	381.669	146.507	235.447	252.068	577.744	599.718	578.491	667.468	753.947	351.653	261.693	248.459	315.248	332.828	407.474	310.418	485.94	413.901	281.286	142.918	89.0036	309.261	711.22	775.521	746.716	278.405	433.065	236.826	152.94	248.872	389.135
AFUA_1G01740	1575.95	1514.03	1731.4	1753.93	1772.33	2523.61	1540.71	1544.23	1835.27	1375.73	1269.37	1134.96	2548.73	2237.25	2265.82	1619.62	1574.4	2090.3	1535.3	1600.37	1783.1	2940.04	2365.9	2609.54	1705.44	2045.01	1809.58	1509.4	1206.52	1424.22	1941.95	2237.5	2665.78	1909.63	1742.82	1758.83
AFUA_1G01750	437.959	283.881	416.161	591.964	522.045	628.145	395.729	334.583	276.185	330.367	267.513	254.216	691.857	692.037	671.419	317.449	236.036	347.436	452.001	460.623	446.377	740.093	667.957	713.917	253.101	226.649	293.933	397.141	293.185	308.4	645.349	639.508	749.284	353.674	281.427	311.87
AFUA_1G01760	604.173	793.498	868.736	1289.14	1234.74	1720.73	4028.95	3977.82	3221.65	596.895	823.52	844.718	1198.35	1388.31	1785.73	3671.8	3375.73	3116.51	850.321	933.057	1070.82	1560.16	1670.42	1557.01	3961.78	3257.95	2550.72	1153.79	1145.72	872.99	1618.29	1319.37	1421.95	2945.16	2398.28	3210.01
AFUA_1G01770	170.611	185.833	162.129	356.825	441.856	389.027	1095.62	896.034	953.034	142.042	138.128	180.153	345.522	421.498	379.998	1060.26	880.372	733.686	74.081	125.49	78.2062	269.741	355.679	414.286	848.726	646.829	1214.5	88.2536	122.948	165.127	457.45	441.602	460.715	682.92	701.76	1040.97
AFUA_1G01780	65.0783	21.6616	30.3451	129.006	234.838	282.343	376.619	321.238	201.499	86.1827	61.1957	42.0357	162.599	167.073	290.535	296.766	221.128	147.684	38.6509	50.1961	26.4698	189.09	154.551	223.194	229.946	164.553	273.195	20.7655	39.1814	21.8551	234.136	145.131	380.115	230.472	215.592	228.985
AFUA_1G01790	262.072	198.374	158.661	820.698	900.895	1020.85	668.041	636.756	540.701	627.219	405.64	326.277	991.852	967.664	995.613	686.158	539.984	497.96	215.801	237.693	199.727	1010.51	1069.16	1135.85	738.543	524.708	751.061	121.998	125.651	179.698	1293.65	1198.3	1281.64	784.881	562.855	487.472
AFUA_1G01812	104.653	107.168	97.1042	426.36	540.864	629.064	392.544	431.812	250.512	134.062	78.6802	126.107	954.454	770.908	609.414	562.056	266.679	243.3	54.7555	64.9597	74.5967	700.784	630.907	557.986	217.97	124.191	522.046	71.3816	75.6605	95.9196	697.488	727.207	483.602	479	282.151	710.838
AFUA_1G01820	114.327	82.086	75.4292	7.31949	20.4563	5.51811	19.9059	11.4387	9.33585	68.627	82.1771	76.0646	11.3819	11.8732	7.08621	8.9929	3.31278	0.946692	47.24	36.9089	37.2983	13.5548	30.6985	6.11492	9.5811	20.6985	22.5409	31.1483	63.5008	58.2803	16.724	6.20881	11.9408	35.0488	10.852	1.40482
AFUA_1G01830	158.299	152.771	157.794	273.566	250.385	178.419	172.783	165.862	172.713	158.002	178.342	170.145	237.394	240.008	193.099	209.535	140.793	173.245	106.29	152.065	107.082	203.322	177.84	197.97	185.235	238.033	229.015	192.081	225.631	241.62	189.866	187.04	179.112	186.927	224.997	209.318
AFUA_1G01850	2531.02	2816	2288.02	1210.46	1082.55	617.108	1012.01	1045.69	2015.76	6071.1	6191.26	5388.58	566.656	586.026	806.057	1124.11	1660.53	1745.7	1136.98	1404.01	1180.31	702.14	834.153	701.687	1635.17	1211.9	4496.45	2390.63	3481.74	3020.86	723.066	637.179	677.639	1235.2	1706.65	3077.96
AFUA_1G01860	522.385	479.975	423.964	461.128	517.135	419.376	722.981	731.125	858.898	909.707	896.955	854.726	318.693	356.195	490.72	785.979	848.073	946.692	242.642	330.704	267.104	340.226	335.567	516.711	711.396	661.318	1420.07	433.481	699.86	519.666	310.869	365.544	443.799	800.812	928.204	1025.52
AFUA_1G01870	1749.2	2070.39	2177.91	1020.15	850.164	1366.65	1452.33	1367.88	1475.84	1364.56	1367.29	1817.54	1034.13	1054.17	1257.8	1314.76	1161.13	1411.52	1942.21	1835.11	1951.55	1320.92	1362.38	1374.33	1225.58	1215	1349.75	2532.1	2092.82	1886.82	1251.35	1362.83	1457.77	1911.75	1344.2	1444.15
AFUA_1G01890	178.526	131.11	115.311	84.1741	72.8244	142.551	557.364	535.714	296.413	86.1827	111.901	172.146	219.508	171.313	224.102	531.48	318.027	297.261	166.414	191.926	175.663	292.106	353.562	208.672	253.101	309.443	212.786	151.848	179.694	177.269	520.411	474.974	206.974	673.362	447.101	328.727
AFUA_1G01900	131.036	141.37	64.1582	26.5331	46.6403	56.1008	224.538	181.113	115.142	167.578	66.4411	60.051	52.0316	43.2523	45.1746	219.427	145.763	104.136	50.4609	35.4326	48.1269	75.907	80.4513	62.6779	165.274	100.388	128.032	15.5742	37.8303	32.7827	89.5225	72.9535	56.7187	323.936	136.011	178.412
AFUA_1G01910	756.315	704.571	435.235	248.863	247.93	287.861	926.817	864.577	558.595	959.182	874.225	618.526	269.101	203.54	252.446	853.426	512.653	408.971	310.281	301.177	360.952	262.286	239.237	301.16	889.445	680.981	398.522	367.291	483.687	380.036	329.561	278.62	319.416	946.317	440.59	434.089
AFUA_1G01920	34.298	41.043	14.739	1475.79	1381.21	363.275	1005.64	1811.13	1413.6	51.0713	33.2205	46.0391	299.995	531.749	354.311	2250.92	1581.85	1151.18	10.7364	8.85814	3.60952	138.937	172.547	206.378	1088.25	484.345	2236.05	12.9785	28.3727	19.4268	170.191	176.951	214.934	1008.98	1483.82	2219.61
AFUA_1G01930	34.298	30.7822	15.606	96.9832	77.7339	82.7716	272.312	263.091	147.818	12.7678	34.969	28.0238	130.892	144.174	100.979	231.118	152.388	142.95	3.22091	0	2.40634	86.0731	80.4513	116.183	143.716	268.046	208.278	18.1699	24.3195	14.5701	75.7498	107.102	59.7039	236.845	184.483	210.723
AFUA_1G01940	246.242	273.62	197.676	300.099	216.018	334.765	580.455	601.486	756.982	625.623	608.461	568.483	362.595	307.006	325.08	764.397	788.443	722.326	227.611	255.41	250.26	373.435	267.818	265.999	611.593	772.055	562.62	193.379	282.376	109.276	399.408	367.872	314.441	569.277	667.757	887.845
AFUA_1G01950	1590.9	1913.06	1825.91	635.881	729.881	400.063	2189.64	1551.85	1213.66	2036.47	2537	3404.89	567.469	637.759	432.259	1425.37	1137.11	1223.13	1841.29	2534.9	2083.89	716.372	1205.71	455.561	2003.25	6257.16	1032.37	1687.2	1659.13	1404.8	1173.63	1037.65	516.439	2235.69	1033.83	1098.57
AFUA_1G01960	6100.65	5704.97	4963.59	1787.79	1484.31	2265.18	2339.34	1848.31	1029.28	9446.59	10462.7	8873.54	1586.96	1496.02	2016.91	1974.84	1253.06	894.624	3478.58	4033.41	3923.54	1263.31	1207.83	2090.54	1845.96	4761.69	620.324	5295.21	7744.4	6856.43	1174.61	1302.3	1471.7	918.703	2136.39	452.351
AFUA_1G01970	2345.46	2691.74	2646.96	638.625	594.051	592.277	853.563	760.675	478.462	3501.57	3409.48	3641.09	559.34	576.697	522.608	719.432	403.331	408.024	2200.96	2765.22	2351	508.983	540.929	541.935	526.96	860.024	461.637	2321.85	2479.23	2081.09	517.46	413.662	460.715	901.71	442.76	398.968
AFUA_1G01980	353.533	347.725	309.52	70.4501	64.6419	21.1527	19.1096	26.6904	42.7893	865.019	699.38	924.786	25.2028	22.8983	17.7155	42.2666	36.4406	44.4945	203.991	249.504	226.196	21.6877	10.5857	15.2873	63.874	33.1176	22.5409	228.421	336.419	267.118	34.4317	27.1635	23.8816	36.1109	44.8548	2.80964
AFUA_1G01990	578.669	1146.92	1136.64	574.58	370.668	376.151	561.345	832.167	1841.5	218.649	227.298	234.199	441.455	399.448	438.46	1144.8	1696.97	1866.88	486.358	326.275	498.113	344.97	251.94	516.711	1759.73	2669.07	1457.94	353.014	413.431	439.53	161.337	346.917	455.74	367.481	1673.37	685.551
AFUA_1G02000	662.215	466.294	443.905	120.772	90.8259	123.238	382.193	332.676	155.597	381.438	251.777	212.18	90.2423	93.2892	160.326	300.363	178.89	120.23	411.203	267.22	430.736	107.761	110.091	119.241	200.405	331.176	133.442	439.97	517.464	529.379	109.198	90.8039	118.413	419.523	217.763	110.981
AFUA_1G02010	1772.06	1799.05	1955.09	1293.72	1436.85	1523	1392.61	1565.2	1913.85	1824.2	1790.41	1891.61	1543.87	1427.33	1581.11	1622.32	1637.34	1909.48	1471.96	1486.69	1605.03	1815.67	1606.91	1552.42	1779.69	1380.59	1530.07	1753.39	1790.18	2262	1425.47	1480.03	1641.86	1299.99	1457.78	1567.78
AFUA_1G02020	2370.08	1850.35	1801.63	896.637	1039.18	846.11	683.965	743.517	563.263	2799.34	2101.64	1729.47	731.694	773.453	875.147	607.021	580.565	389.09	1389.29	1313.96	1607.44	817.356	891.316	811.755	514.984	718.239	457.129	1609.33	1830.72	2050.74	894.241	756.699	734.358	831.612	505.701	414.421
AFUA_1G02030	1972.58	2647.27	3022.37	4331.31	3561.03	4400.69	2120.37	2248.66	3433.26	1959.86	1921.55	2572.19	5000.72	4838.32	4683.1	2376.82	2768.66	3961.91	3045.91	2810.98	3223.3	5488.35	4763.56	4857.54	2957.37	3245.53	2702.2	3027.88	2506.26	2321.5	3251.34	3911.55	5155.43	1860.77	3264.99	3153.82
AFUA_1G02040	1795.81	2397.59	2069.53	879.254	861.619	629.064	598.768	1222.04	1661	2938.19	4266.22	5714.86	447.146	520.724	878.691	1082.75	1928.04	1936.93	2124.73	4130.84	2083.89	347.681	414.959	743.727	1219.19	727.553	2072.86	3075.9	4050.54	2286.29	529.265	793.952	701.521	1375.4	2332.45	2199.94
AFUA_1G02050	1078.19	1042.04	1113.23	679.798	585.868	932.56	885.413	868.39	705.634	845.868	846.25	932.793	824.375	747.162	858.318	755.404	710.592	668.365	1427.94	1203.23	1345.15	823.455	749.467	933.289	653.91	642.689	608.603	1434.12	1352.43	1192.32	649.284	701.596	829.884	802.936	664.14	536.64
AFUA_1G02060	926.926	868.743	554.014	121.687	136.648	108.523	142.526	153.47	119.81	987.91	935.421	662.563	91.0553	97.5297	99.207	113.311	111.806	108.87	125.616	160.923	166.038	90.1395	104.798	142.936	124.554	113.842	137.048	131.083	158.077	267.118	107.23	98.5649	157.22	291.011	198.953	130.648
AFUA_1G02070	2657.66	2557.21	2244.67	5696.39	4669.76	7084.33	2923.77	3310.56	5522.15	3605.31	3283.59	2808.39	6734.03	7147.65	7041.04	3257.23	4415.11	6807.66	1524.56	1748.01	1561.72	6621.53	7209.92	7454.08	3580.14	3903.74	5449.48	1020.11	1151.12	1227.53	5841.59	5767.21	8328.7	3817.13	5228.47	6528.19
AFUA_1G02080	915.493	758.155	591.295	470.277	484.405	492.951	1192.76	918.911	631.726	1517.77	1325.33	1104.94	395.115	420.65	409.229	911.88	664.213	659.844	572.249	448.812	406.672	422.91	555.749	447.918	848.726	989.389	794.34	410.12	471.527	478.384	635.511	412.886	524.399	1044.03	722.017	979.158
AFUA_1G02090	2415.81	2535.54	1942.95	1584.67	1968.71	885.656	592.398	718.733	1070.51	5676.89	4556.46	4393.73	791.856	832.818	822.887	651.985	813.289	1004.44	1177.78	1966.51	1169.48	864.12	1117.85	795.704	638.74	951.097	1206.39	1601.54	2391.41	2124.8	1449.08	1143.97	823.914	853.916	1091.71	1623.97
AFUA_1G02100	364.966	357.986	312.121	357.74	391.943	177.499	591.602	511.883	280.075	343.135	412.634	356.303	209.752	262.906	187.785	517.092	361.922	230.046	341.417	293.795	287.558	207.389	240.295	160.517	431.149	588.873	221.802	243.995	249.95	278.045	242.99	270.859	141.299	479	397.905	165.769
AFUA_1G02110	1310.36	1179.99	1591.82	3133.66	3743.5	2496.02	1115.52	1091.45	1796.37	735.745	758.827	818.696	3160.92	3685.77	2515.61	1245.52	1441.89	1903.8	1622.27	1216.52	1466.67	2289.41	2445.3	2630.94	1636.77	2310.99	2394.74	1483.44	1249.75	1425.44	1531.72	1997.68	2442.89	822.054	1748.61	2225.23
AFUA_1G02120	2250.48	2394.17	2185.71	601.113	876.348	449.726	872.673	706.341	360.986	5135.85	4860.69	4908.17	307.312	426.586	573.983	564.754	380.97	231.94	1786.53	2244.06	2118.79	363.947	523.992	505.245	471.869	820.696	631.144	2983.75	3710.07	2635.97	599.112	428.408	728.388	657.43	697.419	376.491
AFUA_1G02130	5728.65	6555.48	7337.44	1054.01	1312.48	1523.92	887.801	1081.91	1417.49	7354.26	8866.39	10488.9	826.001	870.134	1343.72	934.362	1330.91	1270.46	5508.83	3403	5707.85	933.927	878.613	1243.62	1222.39	1150.84	1601.3	10176.4	11942.2	9659.96	1234.62	849.831	1361.25	616.009	1287.77	1694.21
AFUA_1G02140	3894.14	4017.65	4585.57	3010.14	4122.35	4008.91	1457.91	3949.22	5772.67	5589.11	5719.18	5252.46	3177.18	3048.01	4954.15	3165.5	6848.35	6739.5	2934.25	3007.34	3050.04	4511.72	4218.4	3620.03	4091.13	1670.37	9922.49	8208.88	11769.3	8421.5	3406.77	4004.68	2446.87	2686.01	5676.3	5974.69
AFUA_1G02150	1298.93	1544.81	1263.22	1688.06	1470.4	2348.87	1930.87	1893.11	2025.88	1843.35	2215.29	1991.69	1952	1853.06	2477.52	1816.57	1945.43	2021.19	1203.55	1353.82	1111.73	1728.92	1516.93	2225.83	1927.4	3063.38	2170.23	1462.67	1791.53	1721.7	1380.22	1566.17	2318.5	1547.46	2248.53	2353.07
AFUA_1G02160	2114.16	2264.2	2190.05	512.364	563.775	600.554	636.191	680.604	873.68	3614.89	3213.65	3004.55	369.099	381.638	658.132	660.978	818.258	734.633	1556.77	1522.12	1405.31	418.166	369.441	532.762	929.366	1309.18	795.241	1667.73	1907.73	2051.95	281.356	325.963	559.227	428.02	896.372	642.002
AFUA_1G02170	2090.42	1972.34	1652.51	806.059	917.26	926.122	1971.48	1694.84	990.378	3748.95	3266.1	2838.41	965.836	915.931	1022.19	1929.88	1123.86	1065.98	2009.85	2136.29	2109.16	1089.81	1264.99	959.278	1363.71	1676.58	1060.32	2192.06	2249.55	2452.63	1843.57	1634.47	921.43	2520.33	1187.2	1123.85
AFUA_1G02180	691.237	795.778	845.327	336.696	342.847	359.597	521.534	421.326	322.865	346.327	354.935	382.325	351.213	298.526	327.737	398.385	353.64	285.901	553.997	574.303	625.65	352.425	292.165	292.752	326.556	306.338	312.867	933.152	993.045	995.621	262.665	309.664	304.49	437.579	291.556	310.465
AFUA_1G02190	4715.54	4405.28	4731.23	3034.84	3015.26	3623.56	3684.18	3488.81	3444.93	5244.38	4923.63	4870.14	3976.35	3811.29	3506.79	3607.95	3312.78	3523.59	4965.57	4669.71	4963.09	3922.76	3938.94	3541.3	3114.66	3843.72	2810.39	4949.99	4578.81	3912.06	3866.19	3788.15	3604.13	4287.64	3149.96	3909.61
AFUA_1G02200	547.889	820.86	868.736	1080.54	1067.82	839.672	1213.46	1239.2	1362.26	280.892	353.187	490.417	1096.73	1190.71	700.649	1248.21	1277.91	1266.67	1929.33	1886.78	1807.16	905.462	951.654	785.002	1156.12	991.459	1393.03	1191.42	894.416	798.925	702.407	917.352	627.886	977.118	1199.5	1340.2
AFUA_1G02210	510.073	921.187	934.628	971.662	1296.11	990.5	593.991	694.903	1386.37	293.66	174.845	276.235	1139.82	1075.37	909.693	861.52	1236.5	1579.08	1208.92	1110.22	1168.28	1010.51	745.233	1120.56	1377.28	1888.74	1384.01	617.775	470.176	488.097	391.538	781.534	893.569	466.255	1274.02	1559.35
AFUA_1G02220	422.129	343.165	286.111	128.091	132.557	106.683	132.175	132.499	107.362	411.762	251.777	212.18	144.713	103.466	85.0346	134.894	64.5993	53.9614	196.476	261.315	181.679	113.86	100.564	69.5572	135.732	139.715	87.4585	247.889	371.547	241.62	186.915	191.697	123.388	154.002	118.648	108.171
AFUA_1G02230	33.4186	36.4826	9.53702	16.4689	19.638	7.35748	15.9247	17.1581	6.2239	12.7678	19.2329	18.0153	13.8209	9.32892	5.31466	19.7844	5.79737	15.1471	12.8836	20.669	10.8285	14.9103	23.2885	9.93674	11.1779	10.3493	14.4261	25.9569	10.8086	19.4268	16.724	31.0441	5.97039	36.1109	7.23464	8.42891
AFUA_1G02240	0	0	1.734	1.82987	0	1.83937	5.57364	2.85968	8.55786	0	0	0	8.94293	0.848084	0.885777	1.79858	0.828196	4.73346	4.29455	0	0	6.09967	2.11714	3.82182	3.1937	4.1397	0	0	0	2.42834	0	20.1786	4.97533	4.24834	1.44693	0
AFUA_1G02250	0	0	0	2.74481	0	0	0.796234	0	0	0	0	0	0	0.848084	0	0	0	0	0	0	0	1.35548	1.05857	1.52873	0	1.03493	0	0	0	0	0	0	0	0	0	0
AFUA_1G02255	0	0	0	6.40455	9.00077	4.59842	18.3134	9.53227	16.3377	4.78793	0	0	18.6989	18.6578	13.2867	25.1801	24.8459	19.8805	0	0	2.40634	31.1761	9.52713	19.1091	19.9606	2.06985	9.01634	0	0	0	12.7889	13.9698	3.98026	15.9313	21.7039	2.80964
AFUA_1G02260	6.15605	0	0.867002	9.14936	9.81902	10.1165	11.9435	13.3452	24.8956	0	0	0	6.50395	11.0251	7.97199	23.3815	25.6741	17.9871	0	0	1.20317	4.06645	5.29285	12.2298	21.5575	32.0827	10.8196	0	0	0	3.93505	6.98491	2.9852	0	18.0866	8.42891
AFUA_1G02270	160.937	164.172	162.996	2538.03	3066.81	1826.49	2266.08	3485.95	2827.98	108.526	106.655	78.0663	762.588	1164.42	1846.84	2727.55	2483.76	2869.42	170.708	153.541	194.914	622.844	619.263	1404.14	2045.56	2735.31	3521.78	188.188	186.449	202.767	654.203	648.045	1096.56	685.045	2414.2	3797.22
AFUA_1G02280	1436.12	1502.63	1447.89	465.702	599.778	536.176	605.934	676.791	771.763	2079.56	2260.75	1707.45	388.611	327.36	433.145	721.231	844.76	834.036	1573.95	1021.64	1518.4	447.309	358.855	400.527	908.607	844.5	704.176	1824.77	2036.08	1586.92	374.814	353.126	301.505	590.519	774.83	859.749
AFUA_1G02290	419.491	399.029	371.077	9490.63	7406.81	38034.5	13683.3	15493.8	13421.8	769.261	776.312	588.5	24092.2	19493.2	31216.5	11760	12245.7	13279.2	244.789	504.914	287.558	23709.4	23034.5	41396.5	13037.5	10503.5	12059.4	388.056	499.9	431.031	25402.7	22298.9	39206.6	27741.7	11570.4	16671
AFUA_1G02300	6.15605	7.98058	3.46801	0.914936	4.90951	8.27716	1.59247	8.57905	5.44591	1.59598	6.9938	0	2.43898	1.69617	0.885777	0.89929	3.31278	3.78677	0	1.47636	3.60952	8.13289	8.46856	2.29309	3.99212	2.06985	0	1.29785	1.35108	6.07086	7.87011	4.65661	0.995065	6.37251	2.89386	1.40482
AFUA_1G02310	0	0	0.867002	48.4916	64.6419	51.5023	247.629	195.412	136.148	0	0	0	173.168	118.732	40.7457	72.8425	86.1324	75.7354	0	0	0	234.498	215.948	85.6088	164.476	169.728	40.5735	0	1.35108	0	142.646	245.248	84.5805	436.517	130.947	77.265
AFUA_1G02320	254.157	249.678	204.613	196.711	172.651	148.989	457.835	452.783	283.965	458.045	510.547	524.446	343.896	263.754	161.211	237.413	267.507	300.101	119.174	184.545	135.958	376.146	457.302	226.252	356.896	467.787	205.573	201.166	237.79	274.403	343.333	442.378	212.944	894.275	392.117	334.347
AFUA_1G02330	1361.37	1590.42	1056.01	1800.59	1732.24	644.699	950.704	967.526	1480.51	2424.29	2068.42	1929.64	862.586	1136.43	699.764	915.477	1149.54	1878.24	752.62	884.337	751.983	813.289	1157.02	722.325	1275.88	2375.16	3564.16	904.599	1149.77	955.554	1186.42	902.606	718.437	898.524	1988.08	2615.77
AFUA_1G02340	977.054	1201.65	1341.25	4219.69	4474.2	2569.6	2821.85	3249.55	7730.86	1123.57	1337.56	1473.25	1720.29	2411.1	2709.59	3055.79	5859.49	9902.4	1162.75	940.439	984.195	1554.74	2027.16	2898.47	6834.52	11127.5	15185.3	1187.53	1330.82	1131.61	1602.55	1265.05	2835.94	1783.24	8673.61	10376
AFUA_1G02360	921.649	755.875	811.514	255.267	265.114	286.022	575.678	566.217	365.654	564.976	454.597	434.369	360.969	348.563	313.565	489.214	332.935	354.063	541.113	454.718	617.227	312.439	327.098	258.355	377.655	455.367	423.768	734.581	899.82	1012.62	348.252	318.978	291.554	591.581	402.246	413.016
AFUA_1G02350	153.022	124.269	221.953	201.286	139.921	94.7275	85.1971	97.2292	77.7987	103.738	76.9318	64.0544	110.567	128.061	69.9764	103.418	96.8989	88.0424	101.996	66.436	102.27	110.472	123.853	88.6663	109.384	84.8639	128.934	223.23	228.333	284.116	136.743	97.7888	91.546	106.208	90.433	75.8602
AFUA_1G02370	141.589	79.8058	101.439	81.4293	40.9126	77.2535	89.1783	77.2114	65.3509	65.435	45.4597	34.0289	85.3643	98.3777	75.291	71.0439	67.0839	64.3751	59.05	72.3415	62.565	63.7076	78.3341	58.8561	73.4551	80.7242	77.5406	62.2966	122.948	49.7811	67.8797	82.2667	71.6447	97.7118	73.0699	87.0987
AFUA_1G02380	65.0783	41.043	29.4781	45.7468	31.0936	50.5827	85.1971	125.826	136.926	49.4753	12.2391	16.0136	65.8525	59.3659	59.347	99.8212	106.009	127.803	45.0928	48.7198	22.8603	44.7309	49.7528	56.563	70.2614	71.4099	119.917	15.5742	21.6173	16.9984	53.1232	65.1925	54.7286	132.761	119.372	102.552
AFUA_1G02390	1431.72	936.008	847.061	332.122	323.209	492.031	306.55	290.734	202.277	705.422	346.193	360.306	303.247	281.564	332.166	231.118	204.564	166.618	383.288	385.329	435.548	392.412	346.152	416.579	209.986	397.412	230.818	713.816	783.627	828.066	348.252	322.082	426.883	318.625	294.45	161.554
AFUA_1G02400	525.903	522.158	490.723	830.762	698.787	629.984	1049.44	989.45	1026.94	481.985	514.044	502.427	686.979	626.734	613.843	1008.1	968.989	872.85	811.67	724.891	924.036	524.571	407.549	612.256	1148.13	1024.58	750.16	519.139	548.539	451.672	326.609	497.481	505.493	646.81	890.584	618.12
AFUA_1G02410	948.912	1047.74	1096.76	785.015	781.43	1682.1	930.002	876.969	899.353	732.553	764.073	752.639	1356.07	1307.75	1553.65	792.274	872.09	916.398	2523.05	2090.52	2634.95	1596.76	1251.23	1619.69	907.011	912.805	673.521	1488.63	1242.99	836.565	972.942	1202.18	1636.88	1012.17	796.534	736.125
AFUA_1G02420	599.775	801.478	910.352	358.655	312.572	561.008	506.405	454.689	455.901	639.987	963.396	1483.26	554.462	494.433	563.354	454.141	484.495	424.118	2164.45	3147.59	2119.99	613.356	503.879	697.865	550.115	418.11	488.686	1210.89	1070.06	755.215	462.369	498.257	585.098	612.823	520.171	462.185
AFUA_1G02430	4596.81	3934.43	3527.83	1368.74	1499.86	1402.52	1285.12	1362.16	1549.75	7097.31	6878.4	5406.59	1680.46	1697.02	1419.9	1472.14	1614.15	1535.53	2472.59	3314.42	2585.62	1709.26	1725.47	1387.32	1506.63	1103.23	1869.99	3290.04	4041.08	3850.14	1657.64	1881.27	1369.21	1890.51	1396.29	1758.83
AFUA_1G02440	76.5109	96.907	60.6901	100.643	58.9141	63.4582	173.579	201.131	162.599	102.143	155.612	118.1	87.8033	87.3526	40.7457	188.851	143.278	207.326	37.5773	48.7198	52.9396	82.6844	84.6856	38.9826	245.915	321.862	153.278	53.2117	75.6605	78.9212	86.5712	77.6101	48.7582	115.767	210.528	198.079
AFUA_1G02450	408.058	482.255	358.072	375.124	324.028	132.435	470.575	448.017	343.87	686.27	818.275	670.57	252.028	233.223	182.47	442.451	288.212	258.447	253.378	280.508	258.682	200.611	295.341	145.994	419.971	577.489	394.916	295.909	317.504	338.754	330.545	378.737	143.289	476.876	426.844	273.939
AFUA_1G02460	1719.3	1971.2	2099.01	736.524	891.076	897.612	707.852	635.803	1137.42	1370.94	1141.74	1203.02	447.146	548.71	865.404	636.697	947.456	983.613	1331.31	872.527	1253.71	487.296	463.653	939.404	1147.34	1343.33	1067.54	1166.76	1295.69	1432.72	290.21	372.529	750.279	413.151	958.59	862.558
AFUA_1G02480	532.059	663.528	574.822	126.261	144.831	85.5307	171.19	122.966	100.36	654.35	655.669	702.597	82.1123	83.9603	93.8923	100.72	78.6786	52.0681	703.232	552.157	687.011	144.359	140.79	139.879	89.4236	209.055	103.688	421.8	617.444	529.379	188.883	164.533	99.5065	183.741	137.458	103.957
AFUA_1G02490	9169.88	8170.97	7003.64	743.843	869.802	464.441	532.681	536.667	678.405	10611.6	9623.47	7690.53	341.457	361.284	308.25	375.903	482.01	363.53	2756.03	3197.79	3083.73	433.076	436.131	380.654	603.609	636.48	554.505	6469.77	9525.12	8461.57	588.291	589.837	453.75	566.091	633.031	417.231
AFUA_1G02500	440.598	299.842	360.673	372.379	301.117	535.256	421.208	381.291	328.311	290.468	328.709	224.19	673.159	512.243	580.184	431.659	342.045	305.782	482.063	485.721	540.224	559.136	558.925	555.693	367.275	267.011	248.851	411.417	395.867	545.163	589.274	606.135	622.911	375.978	315.43	309.06
AFUA_1G02510	887.351	896.105	979.712	1532.52	1982.62	2233.91	2829.82	2406.9	1237	885.767	793.796	872.741	2763.36	2520.51	2287.08	2039.59	1354.1	1183.37	407.982	245.075	459.612	2346.34	2247.34	1987.35	1461.12	1106.34	1173.03	703.433	861.99	821.995	2021.63	1664.74	1988.14	1803.42	1203.12	1300.86
AFUA_1G02520	1.75887	0	2.60101	14.639	10.6373	2.75905	5.57364	3.81291	3.11195	0	0	0	12.1949	3.39234	4.42888	2.69787	0.828196	3.78677	0	0	0	7.45515	10.5857	4.58619	4.79055	5.17463	3.60654	0	0	0	9.83763	6.20881	3.98026	8.49668	4.34078	0
AFUA_1G02530	509.194	467.434	514.999	474.852	387.851	171.981	328.049	340.302	229.506	553.804	678.399	710.604	331.701	350.259	205.5	373.205	235.208	230.046	375.773	553.634	399.453	338.87	423.428	191.856	434.343	377.748	283.113	563.265	628.253	865.705	390.554	339.156	233.84	500.242	224.274	259.891
AFUA_1G02540	2581.15	2274.46	2508.24	2377.92	2637.23	2612.82	2734.27	2586.11	2118.46	2844.03	3100	2690.29	2539.79	2592.59	2812.34	2460.46	1817.06	1956.81	1579.32	1155.99	1631.5	2578.8	2673.95	2378.7	1921.01	1959.12	2825.72	2376.36	2596.78	2787.74	3035.89	2303.47	3008.08	2938.79	2097.32	3229.68
AFUA_1G02550	403.661	192.674	242.761	10241.8	8312.62	14464.8	5845.16	6583.94	8190.65	285.68	183.587	200.17	16834.7	15446.2	16577.3	6534.24	6638.82	10122	272.704	222.93	258.682	17316.3	16894.8	16393.3	6060.84	6017.06	4758.83	302.398	222.928	292.616	15189.3	15591.9	18381.8	9017.1	8790.81	6251.44
AFUA_1G02560	1639.27	1296.27	1225.94	410.806	508.953	850.708	293.811	275.483	288.633	1835.37	1877.84	1775.51	778.035	602.14	948.667	272.485	245.974	331.342	1424.72	2198.29	1535.25	483.907	476.356	751.37	198.808	226.649	293.031	1796.22	2048.24	2286.29	486.963	779.982	967.203	404.654	330.623	316.084
AFUA_1G02570	3609.21	3511.45	4046.3	14344.4	27337	12766.1	3033.65	12025.9	24007.9	4155.92	4512.75	4441.77	12102.2	15315.5	15907.7	7364.29	22353	30329.2	3906.97	3614.12	3993.33	14290.8	16181.3	13663.8	16502.6	26048.1	42085.6	6147.9	7122.9	6228.7	16505.6	15993.1	12414.4	7962.45	30671.3	38109.9
AFUA_1G02580	191.717	258.799	247.096	2868.32	4374.37	3443.3	1462.68	2658.55	3343.79	264.932	262.267	190.162	1730.86	2844.47	4196.81	1872.32	2952.52	4766.59	368.258	500.485	351.326	1722.82	2212.41	4205.53	2158.14	5160.14	5646.94	303.696	366.143	261.047	2343.32	2200.25	3546.41	2842.14	5921.55	6302.01
AFUA_1G02590	489.846	877.864	841.859	1364.17	1607.05	1005.22	900.541	1060.94	1859.39	419.742	395.15	478.406	626.818	798.047	1139.99	1328.25	1582.68	1847.94	897.561	838.57	991.414	574.724	561.042	1173.3	1563.32	3039.58	2179.25	659.306	563.401	537.878	362.025	513.003	801.027	630.878	1841.94	1761.64
AFUA_1G02600	3015.59	6195.21	7204.79	2262.64	1802.61	1347.34	4539.33	4551.66	3017.81	3091.41	5178.91	8158.93	2263.37	2047.27	1490.76	4723.07	3271.37	3069.18	5894.27	7891.12	6033.91	2255.52	1962.59	1734.34	4724.28	3868.55	1561.63	5842.91	5408.38	3777.29	2022.62	2117.2	1510.51	7413.35	2529.23	1541.09
AFUA_1G02610	315.718	408.15	513.265	1194.91	1095.64	829.556	1977.85	1899.78	1974.53	118.102	122.391	152.129	1293.47	1369.66	984.984	2413.69	1985.19	1917.05	661.361	714.556	583.538	1173.17	790.751	1011.25	2266.73	2683.56	1131.55	345.227	344.526	314.471	706.342	1356.63	972.179	1829.97	2013.4	903.298
AFUA_1G02620	596.258	730.793	670.193	492.236	502.407	651.137	421.208	361.273	332.201	467.621	367.174	414.352	480.479	456.269	515.522	443.35	408.301	349.329	1343.12	1328.72	1309.05	336.159	377.909	593.147	356.896	396.377	290.326	743.666	547.188	492.954	471.223	448.587	619.926	363.233	421.056	248.653
AFUA_1G02630	209.306	361.406	432.634	978.982	988.448	880.138	965.036	1012.33	1776.14	63.8391	68.1895	64.0544	1247.95	1041.45	932.723	1303.07	1561.98	1650.08	418.719	307.082	345.31	1221.97	1045.87	1214.58	2026.4	2186.8	1119.83	203.762	101.331	159.057	461.385	1057.83	961.233	865.599	1559.79	1154.76
AFUA_1G02633	0	0	0	0.914936	0	0	0.796234	0	0	0	0	0	0.812993	0.848084	0	0	0	0.946692	0	0	0	2.03322	0	0.764365	0	2.06985	0.901634	0	0	0	0	0	0	0	0	2.80964
AFUA_1G02636	0.879436	0	0	0	7.36427	0.919685	6.36988	3.81291	0.777987	0	0	8.0068	0.812993	0.848084	5.31466	2.69787	4.96918	0.946692	3.22091	8.85814	1.20317	4.06645	2.11714	6.87928	3.1937	10.3493	2.7049	3.89354	2.70216	0	6.88634	11.6415	0.995065	8.49668	0.723464	0
AFUA_1G02640	1088.74	972.491	1070.75	887.488	917.26	702.639	1105.97	1102.88	977.93	1058.13	1043.82	1120.95	683.728	721.719	778.598	1029.69	925.923	926.811	1664.14	1445.35	1638.72	581.502	530.343	724.618	930.963	725.483	931.388	1531.46	1326.76	1255.45	566.648	564.226	625.896	763.639	857.305	803.556
AFUA_1G02650	668.371	518.738	488.989	193.052	220.928	175.66	359.898	268.81	171.157	699.038	542.019	422.359	147.965	175.553	201.071	265.291	226.098	135.377	298.471	286.413	287.558	185.023	176.781	193.384	227.551	210.09	171.311	358.206	385.058	356.967	213.477	203.339	196.028	349.426	254.659	68.8361
AFUA_1G02660	10.5532	6.8405	6.93602	73.1949	95.7354	34.0283	16.7209	9.53227	15.5597	4.78793	0	8.0068	104.876	69.5429	28.3449	14.3886	7.45376	11.3603	5.36819	4.42907	3.60952	72.5183	44.4599	39.747	9.5811	7.24448	19.836	0	4.05324	2.42834	42.3018	64.4164	27.8618	13.8071	14.4693	2.80964
AFUA_1G02670	2065.8	2307.53	2148.43	1710.93	1383.66	2616.5	2027.21	2122.84	1980.76	2500.9	2384.89	2632.24	2286.14	2001.48	2499.66	2106.14	2041.5	2163.19	2257.86	2464.04	2115.18	2593.71	2632.66	2727.25	1608.83	1853.55	1668.93	1819.58	1942.85	1920.82	2688.63	2508.36	2853.85	2588.3	1952.63	1770.07
AFUA_1G02680	1540.77	1579.01	2050.46	603.858	620.235	945.436	502.424	457.549	959.258	917.687	771.066	932.793	497.552	582.634	978.783	508.998	929.236	962.786	1394.65	937.486	1446.21	476.452	412.842	974.565	918.987	1169.47	926.88	1493.82	1509.16	1716.84	403.343	381.842	930.386	310.129	703.207	802.151
AFUA_1G02700	855.691	664.668	587.827	324.802	441.038	286.942	1125.08	967.526	888.461	933.646	694.135	524.446	255.28	334.145	347.224	1001.81	795.068	834.036	389.73	360.231	397.047	231.11	334.508	306.51	665.886	804.138	1281.22	523.032	621.497	613.157	377.765	268.531	284.589	1023.85	1304.41	1461.01
AFUA_1G02710	3763.11	3643.7	4138.2	602.943	779.794	687.924	1224.61	1137.2	1184.87	3295.69	3750.43	3332.83	839.009	922.715	762.654	1138.5	1232.36	1280.87	4102.37	4269.62	4235.17	876.997	904.018	698.629	1168.1	1500.64	1209.99	4661.87	4797.69	4874.9	942.445	1024.45	635.847	1216.09	1185.76	1588.85
AFUA_1G02720	419.491	448.052	366.742	974.407	981.084	412.938	790.661	668.212	547.703	322.387	309.476	236.201	494.3	519.875	421.63	660.978	555.72	452.519	373.626	281.984	286.355	347.681	328.157	424.987	515.782	724.448	590.57	365.993	340.472	384.893	424.002	420.647	496.538	729.652	486.168	490.281
AFUA_1G02730	1.75887	1.14008	0	257.097	237.293	224.403	50.1628	58.1469	114.364	0	1.74845	6.0051	378.855	349.411	201.071	73.7418	110.978	147.684	0	1.47636	0	164.013	181.015	160.517	54.2929	89.0036	200.163	3.89354	1.35108	0	166.256	246.8	261.702	44.6076	112.137	123.624
AFUA_1G02740	0	0	0	4.57468	5.72776	0	1.59247	2.85968	1.55597	0	0	0	5.69095	5.0885	2.65733	0	0.828196	0	0	0	0	4.06645	2.11714	2.29309	0.798425	2.06985	0.901634	0	0	0	3.93505	6.98491	2.9852	2.12417	7.23464	18.2626
AFUA_1G02750	0	0	0	4.57468	5.72776	1.83937	0.796234	1.90645	0	0	0	0	0.812993	1.69617	0	1.79858	1.65639	0	0	0	0	3.3887	1.05857	0	0	0	0	0	0	0	0	5.43271	0.995065	0	0	2.80964
AFUA_1G02760	280.54	278.18	440.437	2583.78	2737.05	1237.9	1899.02	2021.8	2114.57	276.104	243.035	394.335	980.47	1095.72	1103.68	1703.26	1798.01	1834.69	525.009	225.883	477.659	1127.08	1015.17	882.841	1939.37	2414.48	2638.18	783.899	541.784	559.733	1054.59	769.893	1029.89	1230.96	1611.88	2590.48
AFUA_1G02770	2312.04	2339.45	1939.48	1410.83	1235.56	1070.51	4137.23	4669.86	4618.13	4339.46	4491.77	3230.74	1514.61	1616.45	983.212	4651.13	3466	3114.62	1075.78	1587.08	1229.64	1808.21	2690.88	1132.79	5199.34	12158.3	8698.07	2144.04	2553.54	2332.43	4544.99	4679.12	843.815	5434.69	6025.73	10017.8
AFUA_1G02780	205.788	115.148	123.114	157.369	191.471	176.579	93.9557	68.6324	66.9069	114.91	139.876	94.0799	232.516	226.438	137.295	78.2382	64.5993	66.2684	175.003	156.494	191.304	113.183	165.137	134.528	51.8976	158.344	122.622	128.487	128.353	196.696	213.477	218.084	228.865	53.1042	109.243	81.4794
AFUA_1G02800	2315.56	1838.95	1639.5	988.131	1129.19	869.102	2160.18	1942.68	1238.56	3484.02	2811.51	2223.89	1276.4	1166.96	924.751	1793.18	1260.51	1021.48	1366.74	1477.83	1257.31	963.07	1017.29	849.209	1521.8	2157.82	1212.7	1661.24	1944.21	1878.32	1634.03	1592.56	1041.83	2313.22	1334.07	1114.02
AFUA_1G02810	457.307	620.205	651.119	538.897	602.233	406.501	565.326	545.246	591.27	451.661	535.026	536.456	425.196	517.331	472.119	515.293	476.213	466.719	1019.96	1197.32	1210.39	252.12	249.822	392.883	546.123	486.415	528.358	673.582	495.847	548.806	342.35	391.931	395.041	358.985	467.358	571.761
AFUA_1G02820	2998	2624.47	2809.09	7326.81	10440.1	4733.62	886.209	1159.12	3088.61	3321.23	3175.19	3064.6	8666.51	10433.1	4785.85	1834.55	2650.23	3149.64	6044.58	6795.67	6374.41	2060.33	2751.22	323.326	471.869	779.299	705.98	4054.47	3204.76	2416.2	13542.5	14352.4	3048.88	549.098	2689.84	7380.91
AFUA_1G02830	7638.78	6252.21	7112.89	1205.89	1519.49	1470.58	1212.67	1254.45	1412.82	12317.7	12741	11760	1500.79	1492.63	1450.9	1229.33	1383.09	1695.53	3171.52	2706.16	3263	1498.49	1455.53	1292.54	1063.5	963.516	1908.76	7373.07	9538.63	9228.92	1790.45	1565.4	1454.79	1302.12	1386.88	1886.67
AFUA_1G02840	118.724	104.888	95.3702	600.198	589.959	722.872	767.57	809.29	652.731	126.082	124.14	140.119	805.677	725.112	806.057	849.829	624.46	708.126	147.088	129.919	117.911	803.123	712.417	716.21	713.792	519.533	511.227	134.976	140.512	159.057	763.4	703.924	733.363	689.293	627.967	528.211
AFUA_1G02850	1721.06	1229.01	990.116	350.421	484.405	419.376	1844.08	1381.23	714.97	3005.22	2592.95	1849.57	589.42	519.875	435.802	1410.99	861.324	772.501	858.91	1039.35	924.036	579.468	818.274	392.119	1190.45	1397.15	596.882	975.981	1014.66	979.837	1346.77	1188.21	530.37	2162.4	896.372	571.761
AFUA_1G02860	336.824	222.316	169.065	80.5144	84.2799	50.5827	134.564	101.042	28.7855	403.782	412.634	246.209	25.2028	39.0119	39.86	103.418	50.52	21.7739	75.1546	87.105	77.003	19.6545	25.4057	30.5746	64.6724	70.375	31.5572	107.721	166.183	172.412	35.4155	27.9396	33.8322	118.953	66.5587	35.1204
AFUA_1G02870	81.7876	70.6851	81.4982	896.637	816.615	661.253	1242.13	1130.53	511.138	150.022	47.2081	40.034	1108.92	918.475	653.703	1021.59	488.636	429.798	56.9028	56.1015	126.333	675.708	537.753	650.474	641.135	580.594	757.373	106.423	108.086	84.9921	670.927	575.091	586.093	843.295	591.793	949.657
AFUA_1G02880	171.49	84.3661	107.508	287.29	291.298	801.965	804.197	934.163	730.53	137.254	153.864	74.0629	966.649	651.328	647.503	892.995	780.161	735.58	172.856	205.214	232.212	801.09	810.864	687.928	645.127	832.081	600.488	70.0837	105.384	58.2803	1027.05	785.415	749.284	1204.4	723.464	1022.71
AFUA_1G02890	109.93	80.9459	97.1042	1250.72	1166.83	3077.26	909.3	988.497	844.116	127.678	73.4349	62.0527	3019.46	2575.63	3136.54	1028.79	944.144	1268.57	303.839	281.984	295.98	2387	2160.54	3672.77	590.834	784.474	531.063	110.317	97.2778	135.987	1715.68	2343.83	3110.57	1366.9	1284.15	705.219
AFUA_1G02900	80.0287	94.6269	84.9662	944.214	952.445	403.742	179.153	248.792	366.432	57.4552	38.4659	18.0153	438.203	497.825	475.662	187.952	278.274	326.609	120.247	106.298	97.4569	318.538	244.53	424.222	245.915	321.862	665.406	54.5096	39.1814	66.7795	235.119	305.008	382.105	120.016	358.115	559.117
AFUA_1G02910	26.3831	52.4438	20.8081	3526.16	3602.76	1806.26	1324.93	1350.72	1868.73	59.0511	24.4783	24.0204	1352.01	1873.42	1927.45	1139.4	1325.11	1645.35	41.8719	47.2434	22.8603	1390.72	1273.46	1897.15	1454.73	1008.02	3303.59	15.5742	12.1597	9.71338	1400.88	1073.35	1727.43	1365.84	949.908	2490.74
AFUA_1G02920	235.689	207.495	201.144	565.431	595.687	476.397	431.559	388.917	408.443	199.497	146.87	138.117	521.129	468.142	417.201	412.774	439.772	354.063	235.127	156.494	221.384	433.754	362.031	412.757	463.086	280.465	471.555	153.146	178.343	125.06	346.285	242.144	405.987	386.599	296.62	328.727
AFUA_1G02930	129.277	99.1872	126.582	854.55	954.9	584	342.381	448.97	341.536	70.223	33.2205	54.0459	779.661	837.907	556.268	420.868	354.468	342.703	230.832	286.413	210.555	637.076	687.012	544.992	323.362	301.163	213.687	146.657	104.033	138.416	600.096	723.326	533.355	428.02	346.539	321.703
AFUA_1G02940	487.208	535.839	552.28	546.217	539.228	357.757	521.534	514.743	578.045	470.813	386.407	368.313	328.449	409.625	364.94	520.689	480.354	515.947	446.633	413.38	442.767	384.279	322.864	294.28	625.167	541.266	405.735	513.947	540.432	541.521	410.229	350.798	344.293	429.082	439.866	290.797
AFUA_1G02950	218.98	119.709	92.7692	9467.76	10375.4	3148.08	5084.75	5473.43	5625.63	177.153	178.342	154.131	3023.52	4130.17	4175.55	6199.71	4936.88	5583.59	114.879	156.494	120.317	3105.41	4013.04	3815.71	5018.1	5785.24	7664.79	166.124	162.13	203.981	4399.39	4495.18	3411.08	4479.87	6195.75	6974.92
AFUA_1G02960	36.9363	25.0818	18.207	1063.16	1422.94	544.453	889.394	963.713	778.765	36.7075	29.7236	14.0119	357.717	452.877	736.966	931.664	810.804	774.394	16.1046	22.1453	18.0476	408	455.185	532.762	837.548	766.88	1060.32	23.3612	32.4259	55.8519	522.378	356.231	489.572	532.104	813.897	632.168
AFUA_1G02970	108.171	79.8058	80.6312	5781.48	4228.72	2837.23	2946.07	3013.15	3045.82	73.4149	103.159	72.0612	1594.28	1937.02	2742.36	2875.93	3404.71	2806	92.3328	106.298	99.8633	2248.07	2574.44	2684.45	2463.94	2058.47	3809.41	119.402	105.384	154.2	3264.13	2970.14	2226.96	2214.45	2385.98	4065.54
AFUA_1G02980	2378	3549.08	4282.12	2054.95	2211.73	3648.39	2212.74	3509.78	3600.52	2757.85	4402.6	6473.5	3773.92	3843.52	3993.08	3059.38	3703.69	4075.51	4970.94	8091.91	5609.19	4420.23	4441.76	4551.79	2584.5	2019.14	5893.08	6770.87	6160.93	3573.31	5517.93	4893.32	4759.4	4945.07	4544.08	6942.61
AFUA_1G02985	503.037	483.395	372.811	648.69	466.403	969.348	881.432	1054.27	608.386	422.934	508.799	552.469	544.706	591.115	858.318	768.893	665.87	647.537	631.299	726.367	606.399	703.495	711.359	927.939	546.921	449.158	581.554	711.22	601.231	662.938	554.843	528.525	841.825	785.943	473.145	765.626
AFUA_1G02990	7362.64	8072.93	9098.32	1909.47	2064.45	1302.27	1194.35	1602.38	2122.35	8329.4	10261.7	11495.8	1216.24	1267.04	1458.87	1345.34	2163.25	2433.95	6179.86	6185.93	6089.25	1726.88	1729.7	1385.03	1664.72	1755.23	3034.9	11356.2	13216.3	11766.5	1520.9	1551.43	1516.48	1593.13	2335.34	2327.78
AFUA_1G03000	235.689	207.495	241.894	544.387	526.136	465.36	422.8	447.064	788.101	234.609	314.721	316.269	457.715	402.84	460.604	624.107	784.302	649.431	483.137	527.059	570.304	399.189	315.454	447.153	1086.66	1183.96	700.57	533.415	358.037	467.456	234.136	391.155	383.1	313.315	819.685	727.696
AFUA_1G03010	8504.15	8915.45	8221.78	915.851	769.157	858.985	1671.3	1451.77	1237	16310.9	19801.2	18525.7	929.252	866.742	1015.99	1433.47	1145.4	1371.76	8068.38	8635.21	9900.9	1034.91	1037.4	1031.13	1436.37	1249.16	1005.32	16411.3	20609.4	17014.2	891.29	803.265	990.09	1354.16	1138.01	1323.34
AFUA_1G03020	3112.32	2931.15	2541.18	892.978	893.531	1070.51	523.126	543.34	446.565	8640.62	8481.73	8499.22	965.023	976.145	870.719	510.797	504.371	438.318	2834.4	2960.09	4049.88	794.99	781.224	992.145	391.228	475.031	489.587	4985.03	6502.75	4375.88	883.42	1037.65	1076.66	792.315	542.598	539.45
AFUA_1G03030	4989.92	4868.15	5899.95	1873.79	2562.76	2313.01	6277.51	6006.29	3518.06	6181.22	8549.92	8981.63	1962.57	2177.03	2351.74	4958.69	3568.7	3735.65	6991.53	6621.46	9128.47	2461.55	2751.22	2208.25	3732.64	4115.9	3666.05	13023.9	14125.6	11177.7	2635.5	2336.07	1970.23	4129.39	3842.32	3183.32
AFUA_1G03035	504.796	429.811	651.986	560.856	475.404	570.205	349.547	374.618	343.87	582.531	650.423	842.716	660.151	610.62	596.128	449.645	321.34	332.289	1394.65	1843.97	1354.77	521.183	534.578	604.612	336.935	203.88	403.932	1026.6	755.254	769.785	546.973	551.808	655.748	416.337	476.763	518.378
AFUA_1G03040	4134.23	5352.69	5418.76	26780.2	28019.4	20257.9	13966	14996.2	21136.4	4942.74	5684.21	7208.12	15086.7	18902.1	21841.5	14110.8	16790	21332.8	5652.7	6969.88	5871.48	17958.1	26207	20257.2	13425.5	20132.4	39082.2	6899.35	6606.79	3958.2	35590.6	24466.6	26617	22216.7	23090.1	44619.8
AFUA_1G03050	1390.39	1078.52	1242.41	6910.51	7192.43	3171.99	1904.59	3238.11	2775.86	1468.3	1092.78	1040.88	1091.85	1806.42	3752.15	2431.68	2732.22	3124.08	1870.28	1681.57	1994.86	1599.47	2311.92	2989.43	1649.55	2198.18	5002.27	1641.78	1602.38	1478.86	1326.11	1179.67	2370.25	1263.88	3097.15	4790.43
AFUA_1G03060	1216.26	936.008	1053.41	1636.82	1446.67	2048.14	1544.69	1590.94	1497.63	769.261	671.405	682.58	2037.36	2087.13	2143.58	1655.59	1264.66	1726.77	946.948	1322.82	1014.27	2185.04	2137.25	2287.74	1172.09	1519.27	1401.14	1025.3	1040.33	1123.11	2333.49	2334.51	2309.55	1990.35	1441.14	2039.8
AFUA_1G03070	4420.93	3927.58	4465.06	1476.71	1492.49	1482.53	1211.07	1227.76	1265.79	3898.97	3918.28	3647.1	1321.11	1482.45	1466.85	1165.48	1113.1	1276.14	3211.25	3330.66	3473.56	1358.87	1307.33	1398.02	1178.48	1222.25	1193.76	5300.41	5517.82	5914.23	1510.08	1244.09	1538.37	1064.21	1165.5	1383.75
AFUA_1G03080	1132.71	974.771	1121.9	419.956	438.583	464.441	449.076	438.485	266.072	657.542	732.601	678.577	389.424	320.576	428.716	441.551	260.882	190.285	595.869	955.202	625.65	332.093	403.315	337.085	245.116	391.202	242.54	1118.74	1078.16	1878.32	477.125	471.094	405.987	471.566	336.411	318.894
AFUA_1G03090	27622.2	29367.4	38175	3470.35	4135.44	2527.29	1055.01	2267.73	6441.73	31405.6	50315.1	66806.8	3886.92	4052.99	2833.6	1738.33	5341.86	7156.04	30517.1	44993.4	37481.2	5497.83	8227.2	2430.68	4053.6	2208.53	14893.2	61717.8	63985.9	57480.1	11599.6	11125.4	2847.88	3226.61	6354.91	12810.5
AFUA_1G03100	2196.83	2163.88	2046.13	2986.35	2188.82	4871.57	1926.09	2272.49	3026.37	2896.7	2321.94	2476.1	4277.16	4333.71	4551.12	2425.39	2526.83	3382.53	2709.86	3462.06	2632.54	3720.8	3622.42	4796.39	2127	2214.74	2298.27	1836.45	1673.99	1612.42	4041.3	4312.8	4875.82	3214.93	3020.46	4093.64
AFUA_1G03110	5247.6	5719.79	5006.94	5970.87	5078.07	9842.47	2584.58	3195.22	3448.82	9406.69	7749.13	9412	10484.4	8435.89	7800.15	2740.14	3207.6	4415.37	7806.42	9568.26	7028.93	9611.04	9182.03	10969.4	2665.14	3602.58	2122.45	4541.17	4262.66	3428.82	7452.99	10211.2	10421.3	5117.12	4113.62	2461.24
AFUA_1G03120	362.328	271.34	241.894	390.678	379.669	509.505	508.794	510.93	567.931	434.106	512.296	540.459	647.143	536.837	490.72	612.416	556.548	609.67	165.34	162.399	162.428	582.857	574.803	565.63	543.727	398.447	758.274	129.785	190.502	258.619	584.356	517.66	613.955	624.506	543.321	736.125
AFUA_1G03130	1317.4	1280.31	1342.99	1152.82	810.887	929.801	760.404	788.319	1162.31	1725.25	2190.81	1863.58	865.838	1024.49	1070.9	803.066	946.628	1163.48	1913.22	2151.05	2227.07	979.336	1025.75	1075.46	846.33	797.928	1508.43	1802.71	1417.28	1227.53	928.673	795.504	1000.04	773.198	1059.87	1286.81
AFUA_1G03140	1033.34	937.148	782.903	276.311	231.565	241.877	382.989	290.734	217.058	1710.89	1869.09	1599.36	281.296	257.818	234.731	325.543	226.926	210.166	490.652	651.073	581.132	282.618	309.102	201.792	159.685	245.277	298.441	581.435	720.126	859.634	353.171	280.173	242.796	385.537	255.383	160.149
AFUA_1G03150	641.109	677.209	709.208	9115.51	8131.79	1952.49	390.155	1006.61	4335.72	2006.14	2718.84	2253.91	1313.8	1998.93	2217.99	1467.64	3740.13	4386.97	1250.79	1520.65	1671.21	1566.26	2300.27	1498.92	3579.34	6117.45	2621.05	699.539	791.734	774.642	2633.53	2278.63	1765.25	431.206	5653.15	1938.65
AFUA_1G03160	16.7093	19.3814	9.53702	156.454	130.92	45.9842	82.8084	94.3695	81.6887	19.1517	10.4907	24.0204	178.046	139.934	69.9764	101.62	119.26	86.149	19.3255	29.5271	27.673	82.0066	88.9198	69.5572	87.0283	95.2132	149.671	7.78708	8.10649	13.3559	119.035	163.757	56.7187	59.4767	78.8576	282.368
AFUA_1G03170	530.3	490.236	514.132	302.844	432.855	129.676	64.495	91.5098	73.1308	323.983	356.684	332.282	305.686	307.006	141.724	69.2453	77.0222	59.6416	239.421	159.446	197.32	254.831	274.17	112.362	65.4708	44.5018	64.9177	372.482	499.9	502.667	276.438	358.559	104.482	78.5943	39.7905	78.6698
AFUA_1G03175	7.03549	3.42025	1.734	0	0.818252	0	0	0	0	14.3638	15.736	10.0085	0	0.848084	0	1.79858	0	0	3.22091	5.90543	0	0.677741	0	0	0	0	0	0	10.8086	4.85669	0	1.5522	0	0	0	0
AFUA_1G03180	94.9791	79.8058	73.6952	401.657	342.029	91.0488	61.3101	94.3695	300.303	95.7586	62.9442	38.0323	425.196	334.145	86.8061	202.34	332.107	203.539	49.3873	72.3415	52.9396	208.744	123.853	57.3273	211.583	263.906	339.015	84.36	95.9268	67.9937	325.626	338.38	73.6348	71.1597	277.087	841.486
AFUA_1G03200	0	0	0	297.354	212.745	201.411	2.3887	7.62582	80.1327	0	0	0	56.0966	72.0871	194.871	2.69787	44.7226	68.1618	0	0	0	112.505	195.835	151.344	28.7433	12.4191	52.2948	0	0	0	198.72	114.087	201.003	3.18625	37.6201	102.552
AFUA_1G03190	0.879436	1.14008	0	61.3007	81.0069	19.3134	62.9025	81.0243	63.795	3.19195	1.74845	2.0017	12.1949	28.8349	17.7155	95.3247	74.5376	36.921	7.51546	0	1.20317	17.6213	7.40999	15.2873	63.0756	56.9209	48.6883	2.59569	1.35108	0	15.7402	10.0893	5.97039	42.4834	66.5587	21.0723
AFUA_1G03210	10.5532	28.5021	22.5421	411.721	451.675	143.471	207.021	203.037	508.804	14.3638	10.4907	32.0272	183.737	187.427	155.897	258.996	414.926	395.717	21.4727	13.2872	9.62538	89.4618	66.6899	92.4881	361.686	259.766	484.178	6.48923	18.9151	9.71338	84.6037	82.2667	92.5411	91.3393	294.45	514.163
AFUA_1G03220	2.63831	7.98058	6.06901	7.31949	0	0	37.423	27.6436	21.7836	11.1718	5.24535	12.0102	1.62599	5.93659	2.65733	25.1801	14.0793	15.1471	1.07364	2.95271	3.60952	3.3887	2.11714	0	19.1622	30.0129	0	6.48923	13.5108	18.2126	2.95129	10.0893	0	24.4279	21.7039	2.80964
AFUA_1G03230	9.6738	11.4008	17.34	8.23443	7.36427	4.59842	168.802	135.358	79.3547	9.57586	20.9814	14.0119	11.3819	9.32892	3.54311	102.519	74.5376	57.7482	4.29455	14.7636	12.0317	5.42193	7.40999	1.52873	75.8504	142.82	6.31144	15.5742	20.2662	19.4268	12.7889	28.7158	3.98026	159.313	79.581	42.1445
AFUA_1G03240	3.51774	17.1012	9.53702	9.14936	2.45476	2.75905	69.2724	44.8017	25.6736	20.7477	3.4969	2.0017	5.69095	3.39234	0.885777	41.3673	33.1278	13.2537	9.66273	2.95271	6.01586	3.3887	6.35142	0	23.1543	54.8511	0.901634	19.4677	20.2662	4.85669	4.91882	4.65661	0	39.2971	34.0028	5.61927
AFUA_1G03250	0	1.14008	0.867002	15.5539	16.365	2.75905	379.008	296.454	69.2409	0	0	2.0017	14.6339	10.177	5.31466	212.232	82.8196	57.7482	2.14727	0	3.60952	15.588	9.52713	6.11492	139.724	171.798	34.2621	2.59569	0	0	41.3181	45.0139	2.9852	279.328	69.4525	64.6216
AFUA_1G03260	0	0	0	3.65974	0	0	19.1096	5.71936	0	0	0	0	0	0	0	9.89219	7.45376	0.946692	0	0	0	1.35548	0	0	0.798425	7.24448	0	0	0	0	5.90258	1.5522	0.995065	2.12417	0	5.61927
AFUA_1G03270	22.8653	17.1012	12.138	1.82987	4.90951	0.919685	0	8.57905	3.88994	47.8793	41.9628	34.0289	1.62599	0	0	2.69787	3.31278	1.89338	24.6937	5.90543	12.0317	1.35548	3.17571	3.05746	1.59685	3.10478	0	9.08493	6.75541	9.71338	9.83763	3.88051	0	5.31042	0	5.61927
AFUA_1G03280	50.1279	26.2219	16.473	12.8091	12.2738	19.3134	32.6456	24.7839	14.7818	35.1115	8.74225	32.0272	26.8288	18.6578	14.1724	33.2737	17.3921	3.78677	11.81	2.95271	9.62538	12.8771	30.6985	29.8102	35.9291	23.8033	9.91798	14.2763	24.3195	26.7118	24.5941	21.7308	16.9161	60.5388	10.852	7.02409
AFUA_1G03290	11.4327	5.70041	3.46801	2.74481	6.54601	8.27716	8.75858	7.62582	1.55597	6.38391	6.9938	2.0017	1.62599	5.93659	14.1724	10.7915	3.31278	4.73346	8.5891	0	2.40634	6.77741	9.52713	5.35055	7.98425	6.20956	0	12.9785	4.05324	19.4268	9.83763	6.20881	2.9852	9.55876	2.89386	2.80964
AFUA_1G03300	36.0569	22.8017	25.1431	15.5539	49.0951	30.3496	53.3477	44.8017	26.4516	11.1718	10.4907	18.0153	47.9666	35.6195	47.8319	53.9574	34.7842	18.9338	4.29455	1.47636	10.8285	41.3422	67.7485	53.5055	71.0598	40.3621	12.6229	16.872	8.10649	19.4268	28.5291	40.3573	39.8026	106.208	19.5335	11.2385
AFUA_1G03310	494.243	363.686	241.894	0	2.45476	0	0	0	0	632.007	514.044	328.279	4.87796	0.848084	0	0	0.828196	0	9.66273	47.2434	21.6571	0	1.05857	0.764365	0	0	3.60654	92.1471	112.14	100.776	0	0	1.99013	0	0	0
AFUA_1G03320	128.398	180.133	190.74	6.40455	11.4555	9.19685	15.1285	1.90645	6.2239	127.678	211.562	302.257	7.31694	4.24042	7.08621	7.19432	9.93835	4.73346	77.3019	134.348	57.7523	5.42193	10.5857	12.2298	9.5811	5.17463	6.31144	133.678	121.597	106.847	8.85387	4.65661	11.9408	11.6829	2.89386	18.2626
AFUA_1G03352	0	0	3.46801	37.5124	57.2776	87.37	7.96234	1.90645	2.33396	0	0	0	59.3485	60.214	67.319	0	3.31278	4.73346	0	0	0	25.7542	44.4599	87.1376	0.798425	4.1397	5.40981	0	0	0	140.678	42.6856	278.618	0	2.17039	12.6434
AFUA_1G03360	347.377	271.34	169.932	53.0663	72.0061	34.0283	97.1406	54.334	18.6717	336.751	222.053	178.151	19.5118	22.0502	25.6875	64.7489	48.8636	25.5607	68.7128	88.5814	66.1745	18.9767	46.5771	35.9251	58.285	83.829	52.2948	90.8493	125.651	123.846	64.9284	28.7158	51.7434	118.953	75.2402	56.1927
AFUA_1G03370	463.463	392.188	333.796	746.588	735.608	510.425	1358.38	1196.3	1194.21	649.562	566.498	374.318	851.204	738.681	528.809	1288.68	1092.39	945.745	344.638	326.275	323.653	733.316	716.652	573.273	1534.57	1430.27	1163.11	358.206	408.027	263.475	612.885	829.652	478.626	1311.67	1214.7	948.252
AFUA_1G03380	3703.31	3999.41	3898.04	2489.54	3015.26	2307.49	3428.59	3361.08	2617.93	5403.98	5574.06	5666.81	2221.91	2564.61	2611.27	3385.83	2615.44	2646.95	3357.26	3094.44	3578.23	2378.19	2723.7	2400.1	3115.45	2376.19	3211.62	4233.58	4426.14	3847.71	2176.08	1640.68	2198.1	3017.38	2359.22	4406.91
AFUA_1G03390	2916.21	3924.16	3635.34	9840.14	6557.47	11955	2531.23	2884.47	4863.2	4254.87	4042.42	4772.05	14100.6	12217.5	10339.7	2779.71	4094.6	6499.99	3680.43	4061.46	3201.64	11213.2	11442.1	13517.8	3228.83	3971.01	3745.39	2525.61	2275.22	1914.75	9585.79	13449.8	12313.9	4466.07	5509.9	3993.9
AFUA_1G03400	1155.58	1068.26	1071.61	2758.53	2542.31	2717.67	2280.42	2313.48	1989.31	1406.06	987.874	1098.93	2695.89	2565.45	2965.58	2141.21	1970.28	2283.42	1110.14	987.682	1161.06	2535.43	2592.44	2832.74	1725.4	2118.49	1740.15	959.109	1095.73	1115.82	2511.55	2625.55	3030.97	2212.32	1820.24	2324.97
AFUA_1G03410	645.506	599.683	608.635	802.399	912.351	865.423	360.694	360.32	346.982	797.988	907.446	774.658	1007.3	897.273	756.453	361.515	348.671	363.53	807.375	965.537	771.233	921.05	793.927	843.859	356.097	465.717	302.949	805.963	797.138	869.347	731.92	824.22	722.417	447.138	397.905	287.988
AFUA_1G03420	539.974	461.733	384.949	742.013	747.064	920.604	735.721	639.616	543.035	801.18	795.545	580.493	1182.91	978.689	860.975	710.439	549.922	522.574	455.222	411.903	415.094	1135.22	1050.1	1003.61	696.226	714.099	492.292	275.143	376.952	343.611	898.176	1157.94	879.638	1152.36	559.238	431.279
AFUA_1G03430	816.117	785.517	836.657	365.974	310.117	454.324	660.875	598.627	479.24	636.795	697.632	550.468	477.227	412.169	462.375	563.855	424.036	404.237	1196.03	1383.35	1239.27	521.86	493.293	552.636	543.727	521.603	291.228	885.131	728.233	686.007	479.093	506.794	509.473	756.204	369.69	243.033
AFUA_1G03440	602.414	539.259	469.915	776.781	552.32	763.338	868.692	1104.79	1167.76	462.833	351.438	412.35	566.656	543.622	667.876	989.219	1101.5	1065.98	837.437	800.185	847.033	607.256	628.79	681.813	1446.75	3133.76	1610.32	482.799	381.005	356.967	718.147	693.059	711.472	920.827	1530.13	1092.95
AFUA_1G03450	577.79	622.485	549.679	524.258	526.954	743.105	805.789	775.927	792.769	445.277	412.634	436.371	739.011	567.368	611.186	769.792	835.65	791.435	557.218	583.161	659.338	853.954	713.476	595.44	907.809	1305.04	896.225	526.926	468.825	492.954	674.862	675.984	594.054	837.985	869.604	615.31
AFUA_1G03460	2212.66	1940.42	2183.11	596.538	488.496	731.149	703.871	723.5	759.316	1645.45	1384.77	1168.99	822.749	812.464	819.344	647.489	631.085	736.526	972.715	977.348	776.046	858.698	874.378	752.135	613.989	473.996	815.979	1532.76	2014.46	1869.83	939.494	980.216	895.559	928.262	809.556	837.271
AFUA_1G03470	3.51774	0	0.867002	37.5124	33.5483	18.3937	15.9247	12.392	10.8918	0	0	6.0051	51.2186	37.3157	22.1444	31.4752	23.1895	17.0405	2.14727	1.47636	2.40634	34.5648	15.8785	32.8677	15.9685	12.4191	8.11471	1.29785	0	0	25.5779	24.8352	13.9309	29.7384	15.1927	11.2385
AFUA_1G03480	1.75887	5.70041	0.867002	39.3423	47.4586	26.6709	15.9247	26.6904	28.7855	0	1.74845	2.0017	32.5197	44.9484	36.3168	15.2879	31.4715	12.307	3.22091	10.3345	7.21903	47.4419	27.5228	39.747	40.7197	14.489	45.0817	6.48923	2.70216	1.21417	33.448	21.7308	24.8766	41.4213	13.7458	16.8578
[truncated: 9,552 more rows]
