# Supplementary material for: Disruption of the Aspergillus fumigatus RNA interference machinery alters the conidial transcriptome
Source: bioRxiv preprint, doi:10.1101/2022.07.28.501871, version 2 (2023-02-14)
Supplement: Dataset_S3 [file 501871_file11.xlsx]

## Sheet: dcl_down_bio_process
ID	Name	Bgd count	Result count	Result gene list	Pct of bgd	Fold enrichment	Odds ratio	P-value	Benjamini	Bonferroni	(-log10) Bonferroni
GO:0042254	ribosome biogenesis	245	85	Afu1g01990,Afu1g02680,Afu1g05310,Afu1g05410,Afu1g06220,Afu1g06230,Afu1g06290,Afu1g09200,Afu1g10560,Afu1g10990,Afu1g11160,Afu1g12570,Afu1g13070,Afu1g13570,Afu1g14220,Afu1g14580,Afu1g14990,Afu1g16730,Afu1g17090,Afu2g01480,Afu2g01980,Afu2g02190,Afu2g02870,Afu2g03740,Afu2g03930,Afu2g04440,Afu2g05560,Afu2g05950,Afu2g08320,Afu2g08480,Afu2g08860,Afu2g12120,Afu2g12150,Afu2g12880,Afu2g12890,Afu2g13130,Afu…	34.7	6.33	10.68	1.13824e-46	6.1465e-45	6.1465e-45	44.2114
GO:0016073	snRNA metabolic process	20	8	Afu1g13570,Afu1g16730,Afu2g03740,Afu2g08460,Afu2g08860,Afu2g13130,Afu2g15980,Afu3g05860,	40	7.29	11.65	5.44405e-06	0.000146989	0.000293979	3.53168
GO:0006520	cellular amino acid metabolic process	269	31	Afu1g06940,Afu1g10780,Afu1g13090,Afu1g13740,Afu1g14570,Afu2g03580,Afu2g09650,Afu2g12470,Afu2g14030,Afu2g16280,Afu3g07790,Afu3g11640,Afu3g14470,Afu4g03700,Afu4g06620,Afu4g07820,Afu4g08330,Afu4g10410,Afu5g06780,Afu5g08090,Afu5g08890,Afu5g12790,Afu5g13940,Afu6g04700,Afu6g04910,Afu6g07390,Afu6g08720,Afu6g10810,Afu7g01000,Afu7g01010,Afu7g04500,	11.5	2.1	2.32	6.79643e-05	0.00122336	0.00367007	2.43533
GO:0006399	tRNA metabolic process	154	20	Afu1g05310,Afu1g05710,Afu1g16730,Afu2g03580,Afu2g03740,Afu2g08460,Afu2g08860,Afu2g13130,Afu2g14030,Afu2g16280,Afu3g05860,Afu4g07820,Afu4g08330,Afu4g12140,Afu5g11130,Afu5g11650,Afu6g02270,Afu6g04910,Afu6g10500,Afu7g05240,	13	2.37	2.63	0.000276893	0.00373806	0.0149522	1.82529
GO:0140053	mitochondrial gene expression	48	9	Afu1g12170,Afu2g16280,Afu4g08110,Afu4g08330,Afu4g13410,Afu5g08380,Afu5g11740,Afu6g04910,Afu7g05240,	18.8	3.42	4.03	0.00103158	0.0111411	0.0557054	1.2541
GO:0007018	microtubule-based movement	42	8	Afu1g13580,Afu2g11430,Afu3g11860,Afu5g13190,Afu6g02040,Afu6g12980,Afu7g01400,Afu8g04460,	19	3.47	4.1	0.00175224	0.0157701	0.0946208	1.02401
GO:0065003	protein-containing complex assembly	372	34	Afu1g01990,Afu1g06230,Afu1g12570,Afu1g13390,Afu2g02190,Afu2g05560,Afu2g08480,Afu2g09060,Afu2g11320,Afu2g11430,Afu2g12150,Afu2g17050,Afu2g17060,Afu3g05840,Afu3g06495,Afu3g06580,Afu3g08640,Afu4g03645,Afu4g06540,Afu4g07120,Afu4g07570,Afu5g01760,Afu5g03080,Afu5g06560,Afu5g11940,Afu5g12610,Afu5g13470,Afu6g01990,Afu6g04050,Afu6g04100,Afu6g06540,Afu6g07470,Afu6g12980,Afu8g04790,	9.1	1.67	1.78	0.0022888	0.0176565	0.123595	0.907998
GO:0140014	mitotic nuclear division	75	10	Afu1g13390,Afu1g13580,Afu2g02170,Afu2g11430,Afu3g10180,Afu3g11860,Afu4g06540,Afu6g12980,Afu6g13690,Afu7g01400,	13.3	2.43	2.68	0.00753054	0.0508311	0.406649	0.39078
GO:0008150	biological process	9210	518	Afu1g01990,Afu1g02000,Afu1g02180,Afu1g02200,Afu1g02210,Afu1g02350,Afu1g02390,Afu1g02610,Afu1g02630,Afu1g02680,Afu1g02900,Afu1g02930,Afu1g03650,Afu1g03910,Afu1g04340,Afu1g04540,Afu1g04570,Afu1g05120,Afu1g05150,Afu1g05170,Afu1g05180,Afu1g05310,Afu1g05390,Afu1g05400,Afu1g05410,Afu1g05710,Afu1g06030,Afu1g06190,Afu1g06220,Afu1g06230,Afu1g06290,Afu1g06370,Afu1g06410,Afu1g06570,Afu1g06840,Afu1g06940,Afu…	5.6	1.03	1.69	0.00862791	0.0517675	0.465907	0.3317
GO:0006351	transcription, DNA-templated	295	26	Afu1g14110,Afu1g16410,Afu2g02210,Afu2g03430,Afu2g03740,Afu2g05360,Afu2g05480,Afu2g13720,Afu3g00210,Afu3g14840,Afu4g01010,Afu4g03430,Afu4g09860,Afu4g11970,Afu4g14590,Afu5g02270,Afu5g07030,Afu5g07270,Afu5g14140,Afu6g05060,Afu6g06830,Afu6g06880,Afu6g08170,Afu7g05520,Afu7g06320,Afu7g06500,	8.8	1.61	1.7	0.0112747	0.0608834	0.608834	0.215501
GO:0000278	mitotic cell cycle	240	21	Afu1g10720,Afu1g13390,Afu1g13580,Afu2g02170,Afu2g08510,Afu2g09060,Afu2g10710,Afu2g11430,Afu3g10180,Afu3g11860,Afu3g14340,Afu4g06540,Afu4g12110,Afu4g12890,Afu5g03080,Afu6g10620,Afu6g12980,Afu6g13290,Afu6g13690,Afu7g01400,Afu8g04140,	8.8	1.6	1.68	0.0229423	0.112626	1	0

## Sheet: dcl_down_cell_comp
ID	Name	Bgd count	Result count	Result gene list	Pct of bgd	Fold enrichment	Odds ratio	P-value	Benjamini	Bonferroni	(-log10) Bonferroni
GO:0005730	nucleolus	186	70	Afu1g01990,Afu1g02610,Afu1g02680,Afu1g05310,Afu1g05410,Afu1g06230,Afu1g06290,Afu1g09200,Afu1g10440,Afu1g10560,Afu1g11160,Afu1g13070,Afu1g13570,Afu1g14110,Afu1g14220,Afu1g14580,Afu1g14990,Afu1g17090,Afu2g01480,Afu2g01980,Afu2g02190,Afu2g02870,Afu2g03740,Afu2g03930,Afu2g05480,Afu2g05930,Afu2g05950,Afu2g08320,Afu2g09060,Afu2g12880,Afu2g12890,Afu2g13570,Afu2g13720,Afu2g13980,Afu2g15980,Afu2g16040,Afu…	37.6	6.86	11.8	4.23812e-41	1.18667e-39	1.18667e-39	38.9257
GO:0005622	intracellular anatomical structure	4049	323	Afu1g01990,Afu1g02000,Afu1g02610,Afu1g02630,Afu1g02680,Afu1g02900,Afu1g04090,Afu1g04340,Afu1g04540,Afu1g05120,Afu1g05150,Afu1g05170,Afu1g05180,Afu1g05310,Afu1g05390,Afu1g05410,Afu1g06030,Afu1g06190,Afu1g06220,Afu1g06230,Afu1g06290,Afu1g06410,Afu1g06570,Afu1g06840,Afu1g06940,Afu1g06960,Afu1g06980,Afu1g07450,Afu1g09200,Afu1g09320,Afu1g09410,Afu1g10280,Afu1g10440,Afu1g10560,Afu1g10720,Afu1g10780,Afu…	8	1.45	2.23	1.71473e-19	2.40063e-18	4.80126e-18	17.3186
GO:0043226	organelle	3446	282	Afu1g01990,Afu1g02000,Afu1g02610,Afu1g02630,Afu1g02680,Afu1g04090,Afu1g04540,Afu1g05120,Afu1g05150,Afu1g05170,Afu1g05310,Afu1g05390,Afu1g05410,Afu1g06030,Afu1g06190,Afu1g06220,Afu1g06230,Afu1g06290,Afu1g06410,Afu1g06570,Afu1g06840,Afu1g06960,Afu1g06980,Afu1g07450,Afu1g09200,Afu1g09320,Afu1g09410,Afu1g10280,Afu1g10440,Afu1g10560,Afu1g10720,Afu1g10780,Afu1g10990,Afu1g11160,Afu1g11940,Afu1g11960,Afu…	8.2	1.49	2.12	2.47282e-17	2.30796e-16	6.92388e-16	15.1597
GO:0005634	nucleus	1683	159	Afu1g01990,Afu1g02000,Afu1g02610,Afu1g02630,Afu1g02680,Afu1g05150,Afu1g05310,Afu1g05410,Afu1g06190,Afu1g06220,Afu1g06230,Afu1g06290,Afu1g06410,Afu1g09200,Afu1g09320,Afu1g10280,Afu1g10440,Afu1g10560,Afu1g10720,Afu1g10990,Afu1g11160,Afu1g12590,Afu1g13040,Afu1g13070,Afu1g13390,Afu1g13570,Afu1g13580,Afu1g14110,Afu1g14220,Afu1g14580,Afu1g14650,Afu1g14990,Afu1g15710,Afu1g16410,Afu1g16730,Afu1g17090,Afu…	9.4	1.72	2.13	1.80976e-13	1.26683e-12	5.06733e-12	11.2952
GO:0032991	protein-containing complex	1637	152	Afu1g02000,Afu1g02610,Afu1g02680,Afu1g03910,Afu1g05180,Afu1g05310,Afu1g05410,Afu1g06030,Afu1g06230,Afu1g06290,Afu1g06410,Afu1g06570,Afu1g06960,Afu1g06980,Afu1g09200,Afu1g09410,Afu1g10280,Afu1g10720,Afu1g10990,Afu1g11160,Afu1g11940,Afu1g12540,Afu1g12590,Afu1g13070,Afu1g13090,Afu1g13390,Afu1g13570,Afu1g13580,Afu1g14110,Afu1g14120,Afu1g14220,Afu1g14580,Afu1g15710,Afu1g16660,Afu2g01480,Afu2g01990,Afu…	9.3	1.69	2.06	3.33872e-12	1.86968e-11	9.34841e-11	10.0293
GO:0005737	cytoplasm	2781	200	Afu1g02900,Afu1g04090,Afu1g04340,Afu1g04540,Afu1g05120,Afu1g05170,Afu1g05180,Afu1g05390,Afu1g06030,Afu1g06570,Afu1g06840,Afu1g06940,Afu1g06960,Afu1g06980,Afu1g07450,Afu1g09410,Afu1g10780,Afu1g11790,Afu1g11880,Afu1g11940,Afu1g11960,Afu1g12060,Afu1g12170,Afu1g12540,Afu1g13020,Afu1g13040,Afu1g13090,Afu1g13180,Afu1g13390,Afu1g13740,Afu1g13840,Afu1g14120,Afu1g14570,Afu1g14650,Afu1g15140,Afu1g16660,Afu…	7.2	1.31	1.53	3.20384e-06	1.49513e-05	8.97076e-05	4.04717
GO:0005840	ribosome	175	25	Afu1g06570,Afu1g06980,Afu1g09410,Afu1g11940,Afu1g12570,Afu3g07920,Afu3g08080,Afu3g14350,Afu4g07250,Afu4g07605,Afu4g08940,Afu4g11990,Afu4g13410,Afu5g06430,Afu5g08380,Afu5g09500,Afu5g11540,Afu5g11740,Afu5g12790,Afu5g12810,Afu5g13470,Afu6g06890,Afu6g07360,Afu6g09060,Afu7g04420,	14.3	2.6	2.96	9.53417e-06	3.81367e-05	0.000266957	3.57356
GO:0005739	mitochondrion	744	67	Afu1g04090,Afu1g04540,Afu1g05390,Afu1g06570,Afu1g06960,Afu1g06980,Afu1g07450,Afu1g09410,Afu1g10780,Afu1g11940,Afu1g11960,Afu1g12170,Afu1g13180,Afu1g15140,Afu2g00230,Afu2g04270,Afu2g05060,Afu2g08480,Afu2g09740,Afu2g12470,Afu2g13110,Afu2g16280,Afu3g02980,Afu3g07920,Afu3g08080,Afu3g14350,Afu4g03410,Afu4g03645,Afu4g04270,Afu4g07120,Afu4g07250,Afu4g07605,Afu4g08110,Afu4g08330,Afu4g08940,Afu4g11900,Afu…	9	1.64	1.81	3.01105e-05	0.000105387	0.000843095	3.07412
GO:0005654	nucleoplasm	202	23	Afu1g09200,Afu1g13040,Afu1g13580,Afu1g14110,Afu1g14220,Afu2g09060,Afu2g12150,Afu2g17050,Afu3g06580,Afu3g14340,Afu4g07630,Afu4g08190,Afu4g08930,Afu4g11970,Afu5g07030,Afu5g11130,Afu5g13470,Afu6g01990,Afu6g06880,Afu6g08380,Afu6g10620,Afu6g12710,Afu7g04430,	11.4	2.08	2.27	0.000685655	0.00213315	0.0191983	1.71674
GO:0005815	microtubule organizing center	72	11	Afu1g13390,Afu1g13580,Afu2g11430,Afu3g06430,Afu3g11860,Afu4g11602,Afu6g06950,Afu6g12980,Afu7g01400,Afu7g01990,Afu8g04460,	15.3	2.79	3.15	0.00174823	0.00489505	0.0489505	1.31024
GO:0005694	chromosome	300	25	Afu1g02000,Afu1g06410,Afu1g10280,Afu1g10720,Afu1g13580,Afu1g14220,Afu2g02170,Afu2g02190,Afu2g02280,Afu2g08510,Afu2g09060,Afu2g10710,Afu2g12150,Afu3g06480,Afu3g10180,Afu3g14340,Afu4g06540,Afu6g04100,Afu6g06880,Afu6g06950,Afu6g10620,Afu6g12700,Afu6g12980,Afu6g13370,Afu6g13690,	8.3	1.52	1.59	0.0240236	0.0611509	0.67266	0.172204
GO:0005811	lipid droplet	33	5	Afu2g11360,Afu4g03630,Afu5g04080,Afu5g07780,Afu8g02590,	15.2	2.76	3.1	0.0323905	0.0755779	0.906934	0.0424241

## Sheet: dcl_down_mol_func
ID	Name	Bgd count	Result count	Result gene list	Pct of bgd	Fold enrichment	Odds ratio	P-value	Benjamini	Bonferroni	(-log10) Bonferroni
GO:0003723	RNA binding	450	73	Afu1g02610,Afu1g02680,Afu1g05310,Afu1g05710,Afu1g06220,Afu1g06230,Afu1g06980,Afu1g09200,Afu1g10440,Afu1g12170,Afu1g12570,Afu1g12590,Afu1g13070,Afu1g13570,Afu1g14220,Afu1g14990,Afu1g16660,Afu1g16730,Afu1g17090,Afu2g01980,Afu2g01990,Afu2g03580,Afu2g05580,Afu2g05950,Afu2g08320,Afu2g08460,Afu2g08480,Afu2g09060,Afu2g09100,Afu2g12120,Afu2g12880,Afu2g13570,Afu2g13980,Afu2g16040,Afu2g16140,Afu2g16280,Afu…	16.2	2.96	3.7	1.44255e-17	5.48169e-16	5.48169e-16	15.2611
GO:0019843	rRNA binding	33	10	Afu1g02610,Afu1g06230,Afu1g06980,Afu1g09200,Afu1g13070,Afu2g08320,Afu2g08480,Afu4g08930,Afu6g09060,Afu8g04790,	30.3	5.53	7.62	6.66124e-06	0.000126564	0.000253127	3.59666
GO:0003735	structural constituent of ribosome	143	20	Afu1g06570,Afu1g06980,Afu1g09410,Afu1g11940,Afu3g07920,Afu3g08080,Afu4g07250,Afu4g07605,Afu4g11990,Afu4g13410,Afu5g06430,Afu5g08380,Afu5g11540,Afu5g11740,Afu5g12790,Afu5g12810,Afu6g06890,Afu6g07360,Afu6g09060,Afu7g04420,	14	2.55	2.87	9.95527e-05	0.001261	0.003783	2.42216
GO:0005198	structural molecule activity	201	23	Afu1g06570,Afu1g06980,Afu1g09410,Afu1g11940,Afu1g13390,Afu3g07920,Afu3g08080,Afu4g06540,Afu4g07250,Afu4g07605,Afu4g11990,Afu4g13410,Afu5g03080,Afu5g06430,Afu5g08380,Afu5g11540,Afu5g11740,Afu5g12790,Afu5g12810,Afu6g06890,Afu6g07360,Afu6g09060,Afu7g04420,	11.4	2.09	2.28	0.000639573	0.00607594	0.0243038	1.61433
GO:0004518	nuclease activity	118	14	Afu2g03740,Afu2g05560,Afu2g08860,Afu2g11070,Afu3g03050,Afu3g05860,Afu4g02930,Afu4g07010,Afu5g11790,Afu5g12850,Afu6g02270,Afu6g05060,Afu7g01550,Afu8g04640,	11.9	2.16	2.36	0.00508639	0.0349503	0.193283	0.713807
GO:0008168	methyltransferase activity	157	17	Afu1g06190,Afu1g10780,Afu1g14220,Afu1g17090,Afu2g08510,Afu2g09080,Afu3g06400,Afu3g06480,Afu4g03630,Afu4g04270,Afu4g12140,Afu4g13450,Afu5g01760,Afu5g11650,Afu5g12100,Afu6g07150,Afu7g04860,	10.8	1.97	2.13	0.00551846	0.0349503	0.209702	0.678398
GO:0004386	helicase activity	78	10	Afu1g06220,Afu1g14990,Afu2g08480,Afu2g09060,Afu2g13980,Afu2g16140,Afu3g10890,Afu4g13330,Afu5g11050,Afu5g11620,	12.8	2.34	2.56	0.00987916	0.0536297	0.375408	0.425497
GO:0043167	ion binding	1926	126	Afu1g02000,Afu1g02930,Afu1g03650,Afu1g05310,Afu1g06220,Afu1g06940,Afu1g07550,Afu1g10560,Afu1g10720,Afu1g11540,Afu1g12170,Afu1g13020,Afu1g13390,Afu1g14570,Afu1g14990,Afu1g16410,Afu1g17190,Afu1g17270,Afu2g02170,Afu2g02190,Afu2g02360,Afu2g03430,Afu2g03580,Afu2g04440,Afu2g05060,Afu2g05360,Afu2g05480,Afu2g05830,Afu2g07820,Afu2g08280,Afu2g08480,Afu2g09060,Afu2g09360,Afu2g09370,Afu2g09650,Afu2g12150,Afu…	6.5	1.19	1.27	0.0145522	0.0691228	0.552982	0.257289
GO:0003674	molecular function	9626	534	Afu1g01990,Afu1g02000,Afu1g02180,Afu1g02200,Afu1g02210,Afu1g02350,Afu1g02370,Afu1g02390,Afu1g02610,Afu1g02630,Afu1g02680,Afu1g02900,Afu1g02930,Afu1g03650,Afu1g03910,Afu1g04090,Afu1g04340,Afu1g04540,Afu1g05120,Afu1g05150,Afu1g05170,Afu1g05180,Afu1g05310,Afu1g05390,Afu1g05400,Afu1g05410,Afu1g05710,Afu1g06030,Afu1g06190,Afu1g06220,Afu1g06230,Afu1g06290,Afu1g06370,Afu1g06410,Afu1g06570,Afu1g06840,Afu…	5.5	1.01	2.31	0.030994	0.126604	1	0
GO:0140657	ATP-dependent activity	282	23	Afu1g06220,Afu1g14990,Afu1g17190,Afu2g02170,Afu2g08480,Afu2g09060,Afu2g11360,Afu2g12150,Afu2g13980,Afu2g16140,Afu3g10890,Afu4g13330,Afu5g02260,Afu5g11050,Afu5g11130,Afu5g11620,Afu5g13190,Afu6g03580,Afu6g04360,Afu6g04380,Afu6g13290,Afu6g13690,Afu7g01400,	8.2	1.49	1.55	0.0365613	0.126604	1	0
GO:0016779	nucleotidyltransferase activity	84	9	Afu1g13230,Afu1g14110,Afu2g05480,Afu2g13720,Afu3g09020,Afu3g13270,Afu4g11970,Afu6g07620,Afu6g08170,	10.7	1.95	2.09	0.0399803	0.126604	1	0
GO:0003924	GTPase activity	84	9	Afu1g12170,Afu1g13390,Afu2g12880,Afu2g13570,Afu3g14350,Afu4g08110,Afu5g03080,Afu5g03880,Afu5g13520,	10.7	1.95	2.09	0.0399803	0.126604	1	0

## Sheet: dcl_up_cell_comp
ID	Name	Bgd count	Result count	Result gene list	Pct of bgd	Fold enrichment	Odds ratio	P-value	Benjamini	Bonferroni	(-log10) Bonferroni
GO:0005618	cell wall	209	15	Afu1g03580,Afu1g04130,Afu1g14550,Afu2g01730,Afu2g14330,Afu3g03040,Afu3g07030,Afu3g11550,Afu6g02800,Afu6g03210,Afu6g12000,Afu7g04030,Afu8g01910,Afu8g02130,Afu8g05880,	7.2	2.09	2.23	0.00566654	0.135997	0.135997	0.866471
GO:0030312	external encapsulating structure	249	16	Afu1g03580,Afu1g04130,Afu1g14550,Afu2g01730,Afu2g14330,Afu3g01790,Afu3g03040,Afu3g07030,Afu3g11550,Afu6g02800,Afu6g03210,Afu6g12000,Afu7g04030,Afu8g01910,Afu8g02130,Afu8g05880,	6.4	1.87	1.97	0.0120951	0.145141	0.290281	0.537181

## Sheet: dcl_up_mol_func
ID	Name	Bgd count	Result count	Result gene list	Pct of bgd	Fold enrichment	Odds ratio	P-value	Benjamini	Bonferroni	(-log10) Bonferroni
GO:0016491	oxidoreductase activity	956	52	Afu1g01500,Afu1g03150,Afu1g09750,Afu1g13370,Afu1g14550,Afu1g15610,Afu1g17690,Afu2g00200,Afu2g00480,Afu2g04870,Afu2g07920,Afu2g08260,Afu2g15430,Afu2g15740,Afu2g17560,Afu2g17600,Afu3g01490,Afu3g01690,Afu3g01790,Afu3g03930,Afu3g10820,Afu4g00160,Afu4g00180,Afu4g00590,Afu4g03940,Afu4g04530,Afu4g08240,Afu4g08890,Afu5g02300,Afu5g06240,Afu5g08900,Afu5g09980,Afu5g14340,Afu6g00740,Afu6g03070,Afu6g03890,Afu…	5.4	1.58	1.73	0.000536907	0.0161072	0.0161072	1.79298

## Sheet: ppd_down_bio_process
ID	Name	Bgd count	Result count	Result gene list	Pct of bgd	Fold enrichment	Odds ratio	P-value	Benjamini	Bonferroni	(-log10) Bonferroni
GO:0055085	transmembrane transport	676	83	Afu1g01260,Afu1g01550,Afu1g01930,Afu1g03280,Afu1g03530,Afu1g10370,Afu1g10890,Afu1g10930,Afu1g12240,Afu1g13800,Afu1g15140,Afu1g16340,Afu1g17680,Afu2g00180,Afu2g00780,Afu2g04070,Afu2g04270,Afu2g05840,Afu2g05880,Afu2g07630,Afu2g08830,Afu2g09450,Afu2g12550,Afu2g14230,Afu2g14590,Afu2g15140,Afu2g15150,Afu2g15240,Afu2g15730,Afu2g16770,Afu2g16930,Afu3g00220,Afu3g00540,Afu3g01360,Afu3g01700,Afu3g02520,Afu…	12.3	1.64	1.82	3.20938e-06	0.000166888	0.000166888	3.77758
GO:0006355	regulation of transcription, DNA-templated	619	73	Afu1g04140,Afu1g06190,Afu1g11090,Afu1g14945,Afu1g15240,Afu1g15370,Afu1g15850,Afu1g16160,Afu1g17240,Afu1g17350,Afu2g02540,Afu2g04150,Afu2g04170,Afu2g04600,Afu2g05360,Afu2g08040,Afu2g08240,Afu2g09360,Afu2g15255,Afu2g15340,Afu2g16160,Afu3g00690,Afu3g01980,Afu3g02160,Afu3g02750,Afu3g02920,Afu3g04040,Afu3g05780,Afu3g06290,Afu3g11010,Afu3g11250,Afu3g12180,Afu3g12890,Afu3g13990,Afu4g01105,Afu4g01322,Afu…	11.8	1.58	1.73	5.15894e-05	0.00134132	0.00268265	2.57144
GO:0006351	transcription, DNA-templated	295	34	Afu1g15370,Afu1g15850,Afu1g17240,Afu2g04150,Afu2g05360,Afu2g08240,Afu3g00690,Afu3g02160,Afu3g02750,Afu3g06290,Afu3g12180,Afu4g01105,Afu5g00520,Afu5g02270,Afu5g03030,Afu5g10040,Afu5g12060,Afu5g12080,Afu5g14290,Afu5g14530,Afu6g00200,Afu6g00220,Afu6g05010,Afu6g05060,Afu6g07230,Afu6g08170,Afu6g10010,Afu6g12020,Afu6g14350,Afu7g00652,Afu7g06500,Afu8g01990,Afu8g06460,Afu8g07360,	11.5	1.54	1.64	0.00745446	0.129211	0.387632	0.411581
GO:0005975	carbohydrate metabolic process	468	46	Afu1g01230,Afu1g04260,Afu1g14710,Afu1g15150,Afu1g17320,Afu1g17410,Afu2g00450,Afu2g00800,Afu2g00920,Afu2g01240,Afu2g02120,Afu2g04600,Afu2g11270,Afu2g11610,Afu2g11620,Afu2g11870,Afu2g15312,Afu3g00380,Afu3g00610,Afu3g04250,Afu3g04300,Afu3g07900,Afu4g10860,Afu4g11310,Afu5g00530,Afu5g01380,Afu5g04230,Afu5g06840,Afu5g10540,Afu5g13150,Afu5g13840,Afu5g14190,Afu5g14530,Afu6g03150,Afu6g03280,Afu6g03540,Afu…	9.8	1.31	1.37	0.0329421	0.428247	1	0

## Sheet: ppd_down_cell_comp
ID	Name	Bgd count	Result count	Result gene list	Pct of bgd	Fold enrichment	Odds ratio	P-value	Benjamini	Bonferroni	(-log10) Bonferroni
GO:0005886	plasma membrane	617	72	Afu1g01550,Afu1g10370,Afu1g10890,Afu1g10930,Afu1g11960,Afu1g13800,Afu1g16340,Afu1g17270,Afu1g17680,Afu2g00420,Afu2g02630,Afu2g05060,Afu2g05840,Afu2g05880,Afu2g08830,Afu2g09450,Afu2g11270,Afu2g11870,Afu2g14590,Afu2g15240,Afu2g16930,Afu3g00220,Afu3g00540,Afu3g01030,Afu3g01700,Afu3g02520,Afu3g08480,Afu3g10820,Afu3g12530,Afu3g13520,Afu3g13670,Afu4g00150,Afu4g04180,Afu4g06230,Afu4g08720,Afu4g09150,Afu…	11.7	1.56	1.7	8.1762e-05	0.0023711	0.0023711	2.62505

## Sheet: ppd_down_mol_func
ID	Name	Bgd count	Result count	Result gene list	Pct of bgd	Fold enrichment	Odds ratio	P-value	Benjamini	Bonferroni	(-log10) Bonferroni
GO:0003700	DNA-binding transcription factor activity	353	63	Afu1g04140,Afu1g14945,Afu1g15370,Afu1g15850,Afu1g16160,Afu1g17240,Afu1g17350,Afu2g02540,Afu2g04150,Afu2g04600,Afu2g05360,Afu2g08040,Afu2g08240,Afu2g09360,Afu2g15255,Afu2g15340,Afu2g16160,Afu3g00690,Afu3g01980,Afu3g02160,Afu3g02750,Afu3g02920,Afu3g04040,Afu3g06290,Afu3g11250,Afu3g12180,Afu3g12890,Afu4g01105,Afu4g01322,Afu4g01470,Afu4g11480,Afu4g12410,Afu4g14220,Afu5g00135,Afu5g00520,Afu5g02270,Afu…	17.8	2.39	2.85	4.61896e-11	1.66283e-09	1.66283e-09	8.77915
GO:0022857	transmembrane transporter activity	706	84	Afu1g01260,Afu1g01550,Afu1g01930,Afu1g03280,Afu1g03530,Afu1g10370,Afu1g10890,Afu1g10930,Afu1g12240,Afu1g13800,Afu1g15140,Afu1g16340,Afu1g17680,Afu2g00180,Afu2g00780,Afu2g04070,Afu2g04270,Afu2g05840,Afu2g05880,Afu2g07630,Afu2g08830,Afu2g09450,Afu2g12550,Afu2g14230,Afu2g14590,Afu2g15140,Afu2g15150,Afu2g15240,Afu2g15730,Afu2g16770,Afu2g16930,Afu3g00220,Afu3g00540,Afu3g01360,Afu3g01700,Afu3g02520,Afu…	11.9	1.59	1.76	9.62997e-06	0.000173339	0.000346679	3.46007
GO:0003677	DNA binding	633	68	Afu1g03710,Afu1g07560,Afu1g11090,Afu1g14945,Afu1g15370,Afu1g15850,Afu1g16160,Afu1g17240,Afu2g02540,Afu2g04150,Afu2g04600,Afu2g05360,Afu2g08040,Afu2g08240,Afu2g09360,Afu2g11070,Afu2g15340,Afu3g00690,Afu3g02160,Afu3g02750,Afu3g02920,Afu3g05780,Afu3g06290,Afu3g11140,Afu3g11250,Afu3g12180,Afu3g12890,Afu4g01105,Afu4g06800,Afu4g09640,Afu4g11480,Afu4g12410,Afu4g14220,Afu5g00135,Afu5g00520,Afu5g02270,Afu…	10.7	1.44	1.54	0.00132965	0.0159558	0.0478673	1.31996
GO:0043167	ion binding	1926	173	Afu1g02060,Afu1g04140,Afu1g08840,Afu1g11090,Afu1g13660,Afu1g13920,Afu1g14490,Afu1g14945,Afu1g14970,Afu1g15150,Afu1g15340,Afu1g15360,Afu1g15370,Afu1g15850,Afu1g16160,Afu1g16810,Afu1g17120,Afu1g17190,Afu1g17240,Afu1g17270,Afu1g17430,Afu2g00450,Afu2g01680,Afu2g02120,Afu2g02850,Afu2g03890,Afu2g04150,Afu2g04590,Afu2g04600,Afu2g04630,Afu2g05060,Afu2g05360,Afu2g05450,Afu2g07680,Afu2g07950,Afu2g08040,Afu…	9	1.2	1.29	0.00346778	0.03121	0.12484	0.903646
GO:0016798	hydrolase activity, acting on glycosyl bonds	259	27	Afu1g01230,Afu1g04260,Afu1g14710,Afu1g15150,Afu1g17320,Afu1g17410,Afu2g00920,Afu2g01240,Afu2g11620,Afu2g11870,Afu3g00380,Afu3g00610,Afu4g06800,Afu5g00530,Afu5g03940,Afu5g06840,Afu5g10540,Afu5g14190,Afu5g14530,Afu6g03150,Afu6g03280,Afu6g07070,Afu6g08840,Afu7g00210,Afu7g06740,Afu8g01100,Afu8g07030,	10.4	1.39	1.46	0.0488783	0.351924	1	0

## Sheet: ppd_up_bio_process
ID	Name	Bgd count	Result count	Result gene list	Pct of bgd	Fold enrichment	Odds ratio	P-value	Benjamini	Bonferroni	(-log10) Bonferroni
GO:0016071	mRNA metabolic process	204	38	Afu1g02810,Afu1g06080,Afu1g10190,Afu1g10710,Afu1g11670,Afu1g13890,Afu2g02340,Afu2g03760,Afu2g05780,Afu2g10330,Afu2g11000,Afu2g16910,Afu3g05640,Afu3g05890,Afu3g06770,Afu3g09720,Afu3g09880,Afu4g03160,Afu4g03640,Afu4g07520,Afu4g07550,Afu4g11570,Afu4g11880,Afu4g12250,Afu5g01890,Afu5g04440,Afu5g06760,Afu5g07720,Afu5g07850,Afu5g08690,Afu5g12370,Afu5g12440,Afu5g12890,Afu6g02160,Afu6g04320,Afu6g07980,Afu…	18.6	2.07	2.38	1.07463e-05	0.000397202	0.000601791	3.22055
GO:0006399	tRNA metabolic process	154	31	Afu1g04710,Afu1g06380,Afu1g08930,Afu1g09010,Afu1g09690,Afu1g11670,Afu1g16210,Afu1g16470,Afu2g01920,Afu2g02340,Afu2g02590,Afu2g03580,Afu2g13030,Afu2g15940,Afu3g08030,Afu3g08760,Afu3g09880,Afu3g14290,Afu4g09100,Afu4g12250,Afu4g12920,Afu5g04010,Afu5g09610,Afu5g09620,Afu5g11650,Afu6g02160,Afu6g04440,Afu6g08610,Afu6g08910,Afu7g01370,Afu8g04820,	20.1	2.24	2.61	1.41858e-05	0.000397202	0.000794403	3.09996
GO:0006457	protein folding	72	16	Afu1g05040,Afu1g07440,Afu1g15270,Afu2g02050,Afu2g04620,Afu2g08300,Afu2g08550,Afu2g09290,Afu4g10010,Afu4g12360,Afu5g01890,Afu5g04170,Afu5g05760,Afu5g10270,Afu5g13920,Afu6g07120,	22.2	2.47	2.93	0.000533692	0.00996225	0.0298867	1.52452
GO:0140053	mitochondrial gene expression	48	12	Afu1g04400,Afu1g06810,Afu1g12160,Afu1g16470,Afu2g10290,Afu2g13030,Afu3g08030,Afu3g08760,Afu4g12170,Afu4g12920,Afu5g07140,Afu6g04440,	25	2.78	3.41	0.000863223	0.0112392	0.0483405	1.31569
GO:0006520	cellular amino acid metabolic process	269	40	Afu1g01680,Afu1g09010,Afu1g10780,Afu1g13090,Afu1g16210,Afu2g01920,Afu2g02590,Afu2g03580,Afu2g04210,Afu2g08590,Afu2g08890,Afu2g11260,Afu2g13030,Afu2g14210,Afu2g15940,Afu3g14490,Afu4g07210,Afu4g09830,Afu4g09840,Afu4g11980,Afu4g12470,Afu4g12920,Afu5g00590,Afu5g01690,Afu5g02180,Afu5g02720,Afu5g03480,Afu5g06160,Afu5g07510,Afu5g08120,Afu5g08600,Afu5g09610,Afu5g13810,Afu6g04430,Afu6g07340,Afu6g12110,Afu…	14.9	1.65	1.8	0.0010035	0.0112392	0.0561961	1.25029
GO:0006325	chromatin organization	154	22	Afu1g02410,Afu1g02820,Afu1g05040,Afu1g10280,Afu1g10850,Afu1g13780,Afu1g14600,Afu2g11000,Afu3g05890,Afu3g09850,Afu4g07380,Afu4g08090,Afu5g04170,Afu5g04440,Afu5g07510,Afu5g08110,Afu5g09540,Afu5g11460,Afu6g07980,Afu7g01870,Afu8g04240,Afu8g04270,	14.3	1.59	1.7	0.0196604	0.183497	1	0
GO:0042254	ribosome biogenesis	245	31	Afu1g02410,Afu1g04690,Afu1g06230,Afu1g13460,Afu1g16290,Afu1g16940,Afu1g17090,Afu2g01780,Afu2g02340,Afu2g04780,Afu2g04800,Afu2g08990,Afu2g10300,Afu2g11000,Afu2g11450,Afu2g14090,Afu3g05490,Afu3g09880,Afu3g13280,Afu3g13320,Afu4g05880,Afu4g07500,Afu4g11990,Afu4g12250,Afu4g13450,Afu5g04440,Afu6g02160,Afu6g07080,Afu6g11070,Afu7g04700,Afu8g04820,	12.7	1.41	1.48	0.0322706	0.194905	1	0
GO:0140014	mitotic nuclear division	75	12	Afu1g10640,Afu1g15070,Afu2g05850,Afu3g09920,Afu3g10180,Afu4g10630,Afu5g02170,Afu5g09000,Afu6g02180,Afu6g07980,Afu6g10330,Afu7g03890,	16	1.78	1.94	0.0345916	0.194905	1	0
GO:0065003	protein-containing complex assembly	372	44	Afu1g02410,Afu1g04690,Afu1g06230,Afu1g09160,Afu1g09940,Afu1g10190,Afu1g10850,Afu1g13780,Afu1g14600,Afu1g14790,Afu1g16553,Afu2g08990,Afu2g09290,Afu2g10300,Afu2g12260,Afu2g14880,Afu3g05840,Afu3g07280,Afu3g08590,Afu3g09570,Afu3g10620,Afu3g11100,Afu3g13280,Afu3g13320,Afu4g07120,Afu4g07520,Afu4g11880,Afu5g04170,Afu5g06280,Afu5g06760,Afu5g07720,Afu5g08110,Afu5g08690,Afu5g09540,Afu5g10740,Afu5g10890,Afu…	11.8	1.31	1.38	0.035494	0.194905	1	0
GO:0007059	chromosome segregation	111	16	Afu1g10640,Afu1g12670,Afu1g15070,Afu1g16553,Afu2g02280,Afu2g05850,Afu3g08100,Afu3g09920,Afu3g10180,Afu3g12250,Afu4g10630,Afu5g02170,Afu5g09000,Afu6g02180,Afu6g07980,Afu7g03890,	14.4	1.6	1.72	0.0393916	0.194905	1	0
GO:0036211	protein modification process	595	66	Afu1g02410,Afu1g03000,Afu1g03910,Afu1g04710,Afu1g10850,Afu1g11410,Afu1g13040,Afu1g13930,Afu1g14600,Afu1g15770,Afu2g02050,Afu2g03370,Afu2g03760,Afu2g03810,Afu2g05590,Afu2g08550,Afu2g10310,Afu2g11000,Afu2g11040,Afu2g12130,Afu2g12430,Afu2g13025,Afu2g14920,Afu2g16250,Afu2g16470,Afu2g16480,Afu3g03740,Afu3g05550,Afu3g06560,Afu3g06680,Afu3g08100,Afu3g08190,Afu3g09610,Afu3g10080,Afu3g10400,Afu3g12030,Afu…	11.1	1.23	1.28	0.0411596	0.194905	1	0
GO:0030163	protein catabolic process	222	28	Afu1g05040,Afu1g07400,Afu1g07440,Afu1g11410,Afu1g15770,Afu2g04620,Afu2g05210,Afu2g05590,Afu2g08300,Afu2g11040,Afu2g16470,Afu3g05550,Afu3g08940,Afu3g14060,Afu4g04280,Afu4g04640,Afu4g10350,Afu4g10700,Afu4g12290,Afu4g13160,Afu5g02440,Afu5g02590,Afu5g09340,Afu5g10740,Afu5g13890,Afu6g07980,Afu7g02510,Afu8g04530,	12.6	1.4	1.48	0.0417653	0.194905	1	0

## Sheet: ppd_up_cell_comp
ID	Name	Bgd count	Result count	Result gene list	Pct of bgd	Fold enrichment	Odds ratio	P-value	Benjamini	Bonferroni	(-log10) Bonferroni
GO:0005622	intracellular anatomical structure	4049	432	Afu1g01380,Afu1g01460,Afu1g01640,Afu1g02410,Afu1g02420,Afu1g02620,Afu1g02810,Afu1g02820,Afu1g03000,Afu1g03150,Afu1g03560,Afu1g04400,Afu1g04470,Afu1g04690,Afu1g04710,Afu1g04780,Afu1g05040,Afu1g05370,Afu1g05650,Afu1g05740,Afu1g05960,Afu1g06080,Afu1g06230,Afu1g06380,Afu1g06800,Afu1g06810,Afu1g07400,Afu1g07440,Afu1g07480,Afu1g08930,Afu1g09010,Afu1g09020,Afu1g09350,Afu1g09380,Afu1g09690,Afu1g09850,Afu…	10.7	1.19	1.41	8.27011e-07	2.39833e-05	2.39833e-05	4.62009
GO:0005739	mitochondrion	744	104	Afu1g02620,Afu1g04400,Afu1g04470,Afu1g05650,Afu1g06810,Afu1g07440,Afu1g07480,Afu1g10780,Afu1g12160,Afu1g12730,Afu1g14520,Afu1g14550,Afu1g14790,Afu1g14950,Afu1g15070,Afu1g15500,Afu1g15760,Afu1g16470,Afu1g17490,Afu2g01890,Afu2g02290,Afu2g03300,Afu2g04520,Afu2g08840,Afu2g08890,Afu2g09290,Afu2g09740,Afu2g10290,Afu2g10510,Afu2g11970,Afu2g12260,Afu2g13030,Afu2g13340,Afu2g13970,Afu2g14210,Afu2g14970,Afu…	14	1.55	1.73	2.21343e-06	3.20947e-05	6.41894e-05	4.19254
GO:0043226	organelle	3446	367	Afu1g01380,Afu1g01460,Afu1g01640,Afu1g02410,Afu1g02420,Afu1g02620,Afu1g02810,Afu1g02820,Afu1g03000,Afu1g03150,Afu1g03560,Afu1g04400,Afu1g04470,Afu1g04690,Afu1g04780,Afu1g05370,Afu1g05650,Afu1g05740,Afu1g05960,Afu1g06080,Afu1g06230,Afu1g06380,Afu1g06810,Afu1g07400,Afu1g07440,Afu1g07480,Afu1g08930,Afu1g09020,Afu1g09350,Afu1g09380,Afu1g09690,Afu1g09850,Afu1g09920,Afu1g10190,Afu1g10280,Afu1g10580,Afu…	10.7	1.18	1.35	1.77602e-05	0.000171682	0.000515045	3.28815
GO:0005634	nucleus	1683	195	Afu1g02410,Afu1g02420,Afu1g02810,Afu1g03000,Afu1g04690,Afu1g05370,Afu1g05740,Afu1g06080,Afu1g06230,Afu1g06380,Afu1g06810,Afu1g07400,Afu1g07440,Afu1g08930,Afu1g09020,Afu1g09350,Afu1g09380,Afu1g09690,Afu1g09920,Afu1g10190,Afu1g10280,Afu1g10580,Afu1g10710,Afu1g10850,Afu1g11410,Afu1g11670,Afu1g12610,Afu1g12670,Afu1g12730,Afu1g12810,Afu1g13040,Afu1g13780,Afu1g13890,Afu1g14600,Afu1g15040,Afu1g15270,Afu…	11.6	1.29	1.42	4.38662e-05	0.00031803	0.00127212	2.89547
GO:0032991	protein-containing complex	1637	188	Afu1g01380,Afu1g02410,Afu1g02420,Afu1g02810,Afu1g03910,Afu1g04400,Afu1g04470,Afu1g04690,Afu1g04710,Afu1g04780,Afu1g05040,Afu1g06080,Afu1g06230,Afu1g06380,Afu1g07400,Afu1g07440,Afu1g08930,Afu1g09020,Afu1g09350,Afu1g09380,Afu1g10190,Afu1g10280,Afu1g10580,Afu1g10710,Afu1g11670,Afu1g12670,Afu1g12730,Afu1g12810,Afu1g13090,Afu1g13780,Afu1g13890,Afu1g14600,Afu1g14790,Afu1g15050,Afu1g15770,Afu1g16375,Afu…	11.5	1.28	1.4	0.000105182	0.000610056	0.00305028	2.51566
GO:0005654	nucleoplasm	202	33	Afu1g02410,Afu1g09350,Afu1g10850,Afu1g12810,Afu1g13040,Afu1g14600,Afu1g17490,Afu2g03810,Afu2g11000,Afu2g12130,Afu2g12430,Afu2g14880,Afu3g05890,Afu3g08190,Afu3g09610,Afu3g09880,Afu3g12030,Afu3g12250,Afu3g13280,Afu4g07380,Afu4g08090,Afu4g12250,Afu4g12470,Afu5g04440,Afu5g08110,Afu5g10890,Afu5g11460,Afu5g12370,Afu6g13130,Afu7g01870,Afu8g04240,Afu8g05060,Afu8g05300,	16.3	1.82	2.01	0.000526586	0.00254517	0.015271	1.81613
GO:0005730	nucleolus	186	30	Afu1g06230,Afu1g06380,Afu1g16290,Afu1g16940,Afu1g17090,Afu2g01780,Afu2g04780,Afu2g10870,Afu2g11450,Afu3g05490,Afu3g05640,Afu3g05840,Afu3g08190,Afu3g09880,Afu3g12250,Afu3g13280,Afu4g05880,Afu4g06180,Afu4g07500,Afu4g09630,Afu4g12250,Afu5g01700,Afu5g03450,Afu5g04440,Afu5g06280,Afu6g07080,Afu6g08610,Afu6g11070,Afu7g04700,Afu8g04820,	16.1	1.79	1.98	0.00114494	0.00474333	0.0332033	1.47882
GO:0005737	cytoplasm	2781	287	Afu1g01380,Afu1g01460,Afu1g02620,Afu1g02810,Afu1g03000,Afu1g03150,Afu1g03560,Afu1g04400,Afu1g04470,Afu1g04710,Afu1g04780,Afu1g05040,Afu1g05650,Afu1g05960,Afu1g06080,Afu1g06800,Afu1g06810,Afu1g07440,Afu1g07480,Afu1g08930,Afu1g09010,Afu1g09020,Afu1g09690,Afu1g10710,Afu1g10780,Afu1g10850,Afu1g11640,Afu1g11900,Afu1g12160,Afu1g12610,Afu1g12670,Afu1g12730,Afu1g13020,Afu1g13040,Afu1g13090,Afu1g13460,Afu…	10.3	1.15	1.24	0.00243521	0.00882764	0.0706211	1.15107
GO:0005840	ribosome	175	24	Afu1g04400,Afu1g09850,Afu1g12730,Afu2g02290,Afu2g07380,Afu2g08130,Afu2g10290,Afu2g10300,Afu2g10510,Afu2g12260,Afu3g08080,Afu3g13320,Afu4g08940,Afu4g10480,Afu4g10740,Afu4g11990,Afu4g12170,Afu5g01770,Afu5g03000,Afu5g03570,Afu5g04030,Afu5g09500,Afu6g12960,Afu7g03730,	13.7	1.52	1.63	0.024089	0.0776201	0.698581	0.155784
GO:0005618	cell wall	209	27	Afu1g07440,Afu1g07480,Afu1g11460,Afu1g11640,Afu1g13780,Afu1g14550,Afu2g05340,Afu2g07380,Afu2g07720,Afu3g00270,Afu3g02280,Afu3g08990,Afu3g09690,Afu4g02805,Afu4g03240,Afu4g04318,Afu4g06820,Afu5g01990,Afu5g04170,Afu5g08030,Afu5g13920,Afu5g14210,Afu6g02800,Afu6g14470,Afu8g01710,Afu8g01910,Afu8g05985,	12.9	1.44	1.52	0.0347713	0.100837	1	0
GO:0005575	cellular component	9713	879	Afu1g00450,Afu1g00500,Afu1g01140,Afu1g01380,Afu1g01460,Afu1g01620,Afu1g01640,Afu1g01680,Afu1g02200,Afu1g02410,Afu1g02420,Afu1g02620,Afu1g02810,Afu1g02820,Afu1g02890,Afu1g02930,Afu1g03000,Afu1g03035,Afu1g03150,Afu1g03520,Afu1g03560,Afu1g03910,Afu1g04100,Afu1g04300,Afu1g04330,Afu1g04400,Afu1g04470,Afu1g04690,Afu1g04710,Afu1g04780,Afu1g04810,Afu1g05040,Afu1g05190,Afu1g05330,Afu1g05370,Afu1g05650,Afu…	9	1.01	2.19	0.0466008	0.122857	1	0

[truncated: 6 more sheets: ppd_up_mol_func, rrp_down_bio_process, rrp_down_cell_comp, rrp_down_mol_func, rrp_up_cell_comp, rrp_up_mol_func]
